# Supplementary material for: The Electronic Properties of Cadmium Naphthalene Diimide Coordination Complex
Source: Molecules. 2023 Apr 25;28(9):3709. doi: 10.3390/molecules28093709 (PMC10180404; doi:10.3390/molecules28093709)

## checkCIF/PLATON report

You have not supplied any structure factors. As a result the full set of tests cannot be run.

THIS REPORT IS FOR GUIDANCE ONLY. IF USED AS PART OF A REVIEW PROCEDURE FOR PUBLICATION, IT SHOULD NOT REPLACE THE EXPERTISE OF AN EXPERIENCED CRYSTALLOGRAPHIC REFEREE.

No syntax errors found.      CIF dictionary      Interpreting this report

### Datablock: 1\_a

---

|                        |                                     |                                |
|------------------------|-------------------------------------|--------------------------------|
| Bond precision:        | C-C = 0.0061 Å                      | Wavelength=0.71073             |
| Cell:                  | a=24.891(2)                         | b=7.3061(7)      c=11.7772(11) |
|                        | alpha=90                            | beta=90      gamma=90          |
| Temperature:           | 296 K                               |                                |
|                        | Calculated                          | Reported                       |
| Volume                 | 2141.8(3)                           | 2141.7(3)                      |
| Space group            | P 21 21 2                           | P 21 21 2                      |
| Hall group             | P 2 2ab                             | P 2 2ab                        |
| Moiety formula         | C40 H30 Cd N4 O18, O [+<br>solvent] | C40 H30 Cd N4 O18, O           |
| Sum formula            | C40 H30 Cd N4 O19 [+<br>solvent]    | C40 H30 Cd N4 O19              |
| Mr                     | 983.09                              | 983.08                         |
| Dx, g cm <sup>-3</sup> | 1.524                               | 1.524                          |
| Z                      | 2                                   | 2                              |
| Mu (mm <sup>-1</sup> ) | 0.593                               | 0.593                          |
| F000                   | 996.0                               | 996.0                          |
| F000'                  | 994.97                              |                                |
| h, k, lmax             | 30, 8, 14                           | 30, 8, 14                      |
| Nref                   | 3939[ 2280]                         | 3935                           |
| Tmin, Tmax             | 0.862, 0.888                        | 0.633, 0.745                   |
| Tmin'                  | 0.862                               |                                |

Correction method= # Reported T Limits: Tmin=0.633 Tmax=0.745

AbsCorr = MULTI-SCAN

Data completeness= 1.73/1.00

Theta(max)= 25.380

R(reflections)= 0.0305( 3748)

wR2(reflections)=  
0.0822( 3935)

S = 1.027

Npar= 304

The following ALERTS were generated. Each ALERT has the format

**test-name\_ALERT\_alert-type\_alert-level.**

Click on the hyperlinks for more details of the test.

---

### Alert level B

|                   |                                                |    |       |              |
|-------------------|------------------------------------------------|----|-------|--------------|
| PLAT260_ALERT_2_B | Large Average Ueq of Residue Including         | 09 | 0.413 | Check        |
| PLAT306_ALERT_2_B | Isolated Oxygen Atom (H-atoms Missing ?) ..... |    | 09    | Check        |
| PLAT420_ALERT_2_B | D-H Bond Without Acceptor 05 --H5B .           |    |       | Please Check |

---

### Alert level C

ABSTY02\_ALERT\_1\_C An \_exptl\_absorpt\_correction\_type has been given without  
a literature citation. This should be contained in the  
\_exptl\_absorpt\_process\_details field.

Absorption correction given as multi-scan

|                   |                                                  |      |              |
|-------------------|--------------------------------------------------|------|--------------|
| PLAT090_ALERT_3_C | Poor Data / Parameter Ratio (Zmax > 18) .....    | 7.50 | Note         |
| PLAT094_ALERT_2_C | Ratio of Maximum / Minimum Residual Density .... | 2.08 | Report       |
| PLAT241_ALERT_2_C | High 'MainMol' Ueq as Compared to Neighbors of   | 07   | Check        |
| PLAT767_ALERT_4_C | INS Embedded LIST 6 Instruction Should be LIST 4 |      | Please Check |

---

### Alert level G

|                   |                                                  |       |             |
|-------------------|--------------------------------------------------|-------|-------------|
| PLAT007_ALERT_5_G | Number of Unrefined Donor-H Atoms .....          | 5     | Report      |
| PLAT300_ALERT_4_G | Atom Site Occupancy of O2 Constrained at         | 0.5   | Check       |
| PLAT300_ALERT_4_G | Atom Site Occupancy of O5 Constrained at         | 0.5   | Check       |
| PLAT300_ALERT_4_G | Atom Site Occupancy of H2A Constrained at        | 0.5   | Check       |
| PLAT300_ALERT_4_G | Atom Site Occupancy of H2B Constrained at        | 0.5   | Check       |
| PLAT300_ALERT_4_G | Atom Site Occupancy of H5A Constrained at        | 0.5   | Check       |
| PLAT300_ALERT_4_G | Atom Site Occupancy of H5B Constrained at        | 0.5   | Check       |
| PLAT301_ALERT_3_G | Main Residue Disorder .....(Resd 1 )             | 3%    | Note        |
| PLAT304_ALERT_4_G | Non-Integer Number of Atoms in ..... (Resd 2 )   | 0.50  | Check       |
| PLAT432_ALERT_2_G | Short Inter X...Y Contact 01 ..C11 .             | 3.00  | Ang.        |
|                   | 1/2-x,1/2+y,1-z =                                | 3_556 | Check       |
| PLAT432_ALERT_2_G | Short Inter X...Y Contact 06 ..C1 .              | 3.01  | Ang.        |
|                   | 1/2-x,1/2+y,1-z =                                | 3_556 | Check       |
| PLAT605_ALERT_4_G | Largest Solvent Accessible VOID in the Structure | 131   | A**3        |
| PLAT779_ALERT_4_G | Suspect or Irrelevant (Bond) Angle(s) in CIF ... | 0.00  | Deg.        |
|                   | CD1 -O4 -CD1 2_655 1_555 1_555 .....             | # 38  | Check       |
| PLAT779_ALERT_4_G | Suspect or Irrelevant (Bond) Angle(s) in CIF ... | 0.00  | Deg.        |
|                   | CD1 -O7 -CD1 2_655 1_555 1_555 .....             | # 53  | Check       |
| PLAT779_ALERT_4_G | Suspect or Irrelevant (Bond) Angle(s) in CIF ... | 0.00  | Deg.        |
|                   | CD1 -O5 -CD1 2_655 1_555 1_555 .....             | # 128 | Check       |
| PLAT779_ALERT_4_G | Suspect or Irrelevant (Bond) Angle(s) in CIF ... | 41.30 | Deg.        |
|                   | O2 -O5 -H5B 1_555 1_555 1_555 .....              | # 136 | Check       |
| PLAT789_ALERT_4_G | Atoms with Negative _atom_site_disorder_group #  | 3     | Check       |
| PLAT791_ALERT_4_G | Model has Chirality at C2 (Sohnke SpGr)          | S     | Verify      |
| PLAT791_ALERT_4_G | Model has Chirality at C8 (Sohnke SpGr)          | S     | Verify      |
| PLAT868_ALERT_4_G | ALERTS Due to the Use of _smtbx_masks Suppressed | !     | Info        |
| PLAT883_ALERT_1_G | No Info/Value for _atom_sites_solution_primary . |       | Please Do ! |
| PLAT933_ALERT_2_G | Number of HKL-OMIT Records in Embedded .res File | 3     | Note        |

---

|    |                      |                                                              |
|----|----------------------|--------------------------------------------------------------|
| 0  | <b>ALERT level A</b> | = Most likely a serious problem - resolve or explain         |
| 3  | <b>ALERT level B</b> | = A potentially serious problem, consider carefully          |
| 5  | <b>ALERT level C</b> | = Check. Ensure it is not caused by an omission or oversight |
| 22 | <b>ALERT level G</b> | = General information/check it is not something unexpected   |
|    |                      |                                                              |
| 2  | ALERT type 1         | CIF construction/syntax error, inconsistent or missing data  |
| 8  | ALERT type 2         | Indicator that the structure model may be wrong or deficient |
| 2  | ALERT type 3         | Indicator that the structure quality may be low              |
| 17 | ALERT type 4         | Improvement, methodology, query or suggestion                |
| 1  | ALERT type 5         | Informative message, check                                   |

---

It is advisable to attempt to resolve as many as possible of the alerts in all categories. Often the minor alerts point to easily fixed oversights, errors and omissions in your CIF or refinement strategy, so attention to these fine details can be worthwhile. In order to resolve some of the more serious problems it may be necessary to carry out additional measurements or structure refinements. However, the purpose of your study may justify the reported deviations and the more serious of these should normally be commented upon in the discussion or experimental section of a paper or in the "special\_details" fields of the CIF. checkCIF was carefully designed to identify outliers and unusual parameters, but every test has its limitations and alerts that are not important in a particular case may appear. Conversely, the absence of alerts does not guarantee there are no aspects of the results needing attention. It is up to the individual to critically assess their own results and, if necessary, seek expert advice.

### **Publication of your CIF in IUCr journals**

A basic structural check has been run on your CIF. These basic checks will be run on all CIFs submitted for publication in IUCr journals (*Acta Crystallographica*, *Journal of Applied Crystallography*, *Journal of Synchrotron Radiation*); however, if you intend to submit to *Acta Crystallographica Section C* or *E* or *IUCrData*, you should make sure that full publication checks are run on the final version of your CIF prior to submission.

### **Publication of your CIF in other journals**

Please refer to the *Notes for Authors* of the relevant journal for any special instructions relating to CIF submission.

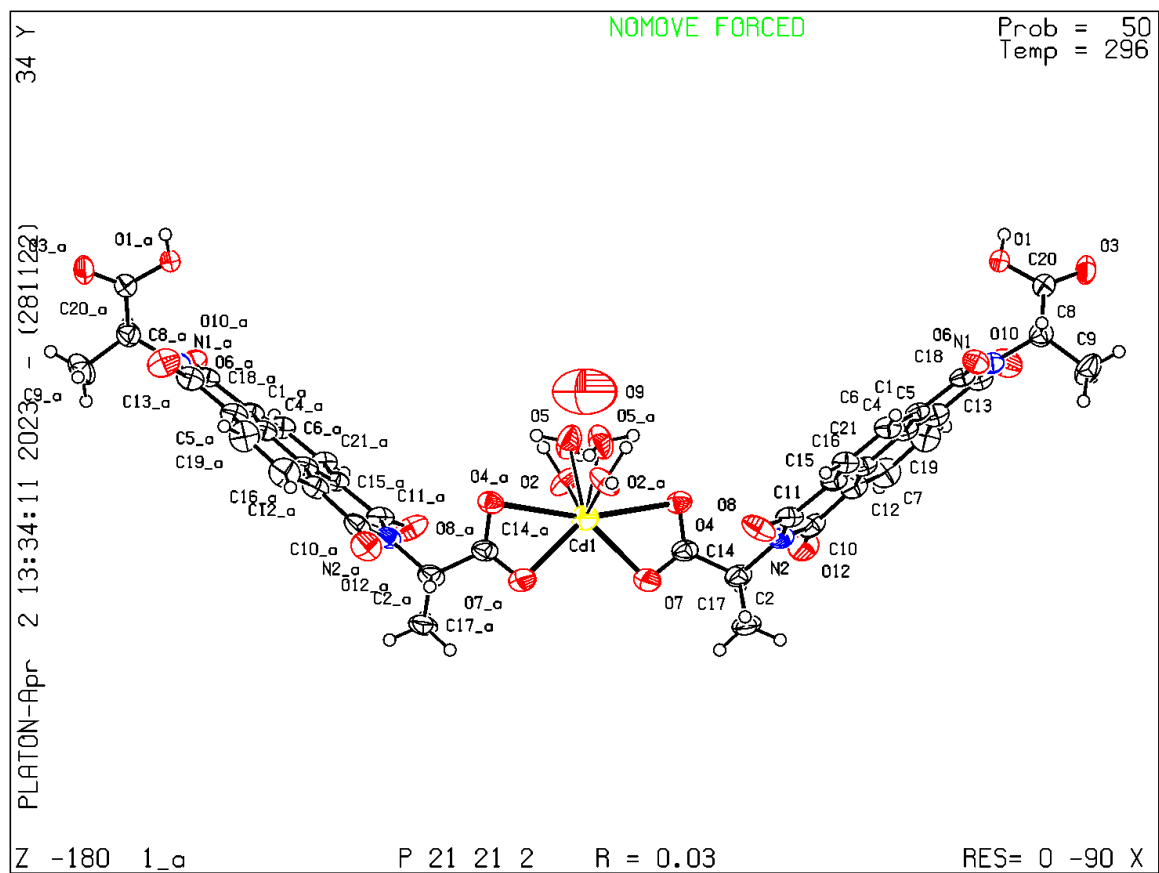

Supplement: Supplementary file 1 [file molecules-28-03709-s001.zip › checkcif.pdf]
