# Supplementary material for: The Electronic Properties of Cadmium Naphthalene Diimide Coordination Complex
Source: Molecules. 2023 Apr 25;28(9):3709. doi: 10.3390/molecules28093709 (PMC10180404; doi:10.3390/molecules28093709)
Supplement: Supplementary file 1 [file molecules-28-03709-s001.zip › 1_a.cif]

data_1_a
_audit_creation_date               2023-04-02
_audit_creation_method
;
Olex2 1.5
(compiled 2022.04.07 svn.rca3783a0 for OlexSys, GUI svn.r6498)
;
_shelx_SHELXL_version_number       '2018/3'
_audit_contact_author_address      ?
_audit_contact_author_email        ?
_audit_contact_author_name         ''
_audit_contact_author_phone        ?
_publ_contact_author_id_orcid      ?
_publ_section_references
;
Dolomanov, O.V., Bourhis, L.J., Gildea, R.J, Howard, J.A.K. & Puschmann, H.
 (2009), J. Appl. Cryst. 42, 339-341.

Sheldrick, G.M. (2015). Acta Cryst. C71, 3-8.
;
_chemical_name_common              ?
_chemical_name_systematic          ndi-cd-water
_chemical_formula_moiety           'C40 H30 Cd N4 O18, O'
_chemical_formula_sum              'C40 H30 Cd N4 O19'
_chemical_formula_weight           983.08
_chemical_absolute_configuration   unk
_chemical_melting_point            ?
loop_
  _atom_type_symbol
  _atom_type_description
  _atom_type_scat_dispersion_real
  _atom_type_scat_dispersion_imag
  _atom_type_scat_source
 'C' 'C' 0.0033 0.0016 'International Tables Vol C Tables 4.2.6.8 and 6.1.1.4'
 'H' 'H' 0.0000 0.0000 'International Tables Vol C Tables 4.2.6.8 and 6.1.1.4'
 'Cd' 'Cd' -0.8075 1.2024
 'International Tables Vol C Tables 4.2.6.8 and 6.1.1.4'
 'N' 'N' 0.0061 0.0033 'International Tables Vol C Tables 4.2.6.8 and 6.1.1.4'
 'O' 'O' 0.0106 0.0060 'International Tables Vol C Tables 4.2.6.8 and 6.1.1.4'

_shelx_space_group_comment
;
The symmetry employed for this shelxl refinement is uniquely defined
by the following loop, which should always be used as a source of
symmetry information in preference to the above space-group names.
They are only intended as comments.
;
_space_group_crystal_system        'orthorhombic'
_space_group_IT_number             18
_space_group_name_H-M_alt          'P 21 21 2'
_space_group_name_Hall             'P 2 2ab'
loop_
  _space_group_symop_operation_xyz
 'x, y, z'
 '-x, -y, z'
 '-x+1/2, y+1/2, -z'
 'x+1/2, -y+1/2, -z'

_cell_length_a                     24.891(2)
_cell_length_b                     7.3061(7)
_cell_length_c                     11.7772(11)
_cell_angle_alpha                  90
_cell_angle_beta                   90
_cell_angle_gamma                  90
_cell_volume                       2141.7(3)
_cell_formula_units_Z              2
_cell_measurement_reflns_used      9891
_cell_measurement_temperature      296.15
_cell_measurement_theta_max        25.380
_cell_measurement_theta_min        2.381
_shelx_estimated_absorpt_T_max     0.891
_shelx_estimated_absorpt_T_min     0.866
_exptl_absorpt_coefficient_mu      0.593
_exptl_absorpt_correction_T_max    0.7452
_exptl_absorpt_correction_T_min    0.6331
_exptl_absorpt_correction_type     multi-scan
_exptl_absorpt_process_details     ?
_exptl_absorpt_special_details     ?
_exptl_crystal_colour              'clear orangish orange'
_exptl_crystal_colour_lustre       clear
_exptl_crystal_colour_modifier     orangish
_exptl_crystal_colour_primary      orange
_exptl_crystal_density_diffrn      1.524
_exptl_crystal_density_meas        ?
_exptl_crystal_density_method      ?
_exptl_crystal_description         block
_exptl_crystal_F_000               996
_exptl_crystal_size_max            0.25
_exptl_crystal_size_mid            0.23
_exptl_crystal_size_min            0.2
_exptl_transmission_factor_max     ?
_exptl_transmission_factor_min     ?
_diffrn_reflns_av_R_equivalents    0.0251
_diffrn_reflns_av_unetI/netI       0.0206
_diffrn_reflns_Laue_measured_fraction_full  0.999
_diffrn_reflns_Laue_measured_fraction_max  0.998
_diffrn_reflns_limit_h_max         30
_diffrn_reflns_limit_h_min         -29
_diffrn_reflns_limit_k_max         8
_diffrn_reflns_limit_k_min         -8
_diffrn_reflns_limit_l_max         14
_diffrn_reflns_limit_l_min         -14
_diffrn_reflns_number              21339
_diffrn_reflns_point_group_measured_fraction_full  0.999
_diffrn_reflns_point_group_measured_fraction_max  0.998
_diffrn_reflns_theta_full          25.242
_diffrn_reflns_theta_max           25.380
_diffrn_reflns_theta_min           1.729
_diffrn_ambient_temperature        296.15
_diffrn_detector_area_resol_mean   ?
_diffrn_measured_fraction_theta_full  0.999
_diffrn_measured_fraction_theta_max  0.998
_diffrn_measurement_device_type    'Bruker APEX-II CCD'
_diffrn_measurement_method         '\f and \w scans'
_diffrn_radiation_type             MoK\a
_diffrn_radiation_wavelength       0.71073
_diffrn_source                     ?
_reflns_Friedel_coverage           0.728
_reflns_Friedel_fraction_full      1.000
_reflns_Friedel_fraction_max       0.999
_reflns_number_gt                  3748
_reflns_number_total               3935
_reflns_special_details
;
 Reflections were merged by SHELXL according to the crystal
 class for the calculation of statistics and refinement.
 
 Structure factors included contributions from the .fab file.
 
 _reflns_Friedel_fraction is defined as the number of unique
 Friedel pairs measured divided by the number that would be
 possible theoretically, ignoring centric projections and
 systematic absences.
;
_reflns_threshold_expression       'I > 2\s(I)'
_computing_cell_refinement         'SAINT v8.34A (Bruker, 2013)'
_computing_data_collection         ?
_computing_data_reduction          'SAINT v8.34A (Bruker, 2013)'
_computing_molecular_graphics      'Olex2 1.5 (Dolomanov et al., 2009)'
_computing_publication_material    'Olex2 1.5 (Dolomanov et al., 2009)'
_computing_structure_refinement    'SHELXL 2018/3 (Sheldrick, 2015)'
_computing_structure_solution      'olex2.solve 1.3 (Bourhis et al., 2015)'
_refine_diff_density_max           0.880
_refine_diff_density_min           -0.424
_refine_diff_density_rms           0.056
_refine_ls_abs_structure_details
;
 Flack x determined using 1534 quotients [(I+)-(I-)]/[(I+)+(I-)]
 (Parsons, Flack and Wagner, Acta Cryst. B69 (2013) 249-259).
;
_refine_ls_abs_structure_Flack     -0.013(7)
_refine_ls_extinction_coef         .
_refine_ls_extinction_method       none
_refine_ls_goodness_of_fit_ref     1.027
_refine_ls_hydrogen_treatment      constr
_refine_ls_matrix_type             full
_refine_ls_number_parameters       304
_refine_ls_number_reflns           3935
_refine_ls_number_restraints       0
_refine_ls_R_factor_all            0.0326
_refine_ls_R_factor_gt             0.0305
_refine_ls_restrained_S_all        1.027
_refine_ls_shift/su_max            0.000
_refine_ls_shift/su_mean           0.000
_refine_ls_structure_factor_coef   Fsqd
_refine_ls_weighting_details      
 'w=1/[\s^2^(Fo^2^)+(0.0462P)^2^+1.4030P] where P=(Fo^2^+2Fc^2^)/3'
_refine_ls_weighting_scheme        calc
_refine_ls_wR_factor_gt            0.0803
_refine_ls_wR_factor_ref           0.0822
_refine_special_details            ?
_olex2_refinement_description
;
1. Others
 Fixed Sof: O2(0.5) H2A(0.5) H2B(0.5) O5(0.5) H5A(0.5) H5B(0.5)
2.a Rotating group:
 O2(H2A,H2B), O5(H5A,H5B)
2.b Ternary CH refined with riding coordinates:
 C8(H8), C2(H2)
2.c Aromatic/amide H refined with riding coordinates:
 C6(H6), C21(H21), C7(H7), C19(H19)
2.d Idealised Me refined as rotating group:
 C17(H17A,H17B,H17C), C9(H9A,H9B,H9C)
2.e Idealised tetrahedral OH refined as rotating group:
 O1(H1)
;
_atom_sites_solution_hydrogens     mixed
_atom_sites_solution_primary       ?
_atom_sites_solution_secondary     ?
loop_
  _atom_site_label
  _atom_site_type_symbol
  _atom_site_fract_x
  _atom_site_fract_y
  _atom_site_fract_z
  _atom_site_U_iso_or_equiv
  _atom_site_adp_type
  _atom_site_occupancy
  _atom_site_site_symmetry_order
  _atom_site_calc_flag
  _atom_site_refinement_flags_posn
  _atom_site_refinement_flags_adp
  _atom_site_refinement_flags_occupancy
  _atom_site_disorder_assembly
  _atom_site_disorder_group
 Cd1 Cd 0.500000 0.000000 0.11587(3) 0.04349(15) Uani 1 2 d S T P . .
 O1 O 0.13697(11) 0.7622(4) 0.6736(2) 0.0383(7) Uani 1 1 d . . . . .
 H1 H 0.122949 0.720769 0.731106 0.058 Uiso 1 1 calc R U . . .
 O4 O 0.40626(11) 0.1150(4) 0.1493(2) 0.0376(7) Uani 1 1 d . . . . .
 O6 O 0.22561(13) 1.0629(4) 0.4546(3) 0.0388(7) Uani 1 1 d . . . . .
 O8 O 0.38899(14) 0.5282(4) 0.0934(3) 0.0532(8) Uani 1 1 d . . . . .
 O10 O 0.09978(14) 0.6138(5) 0.4520(3) 0.0538(9) Uani 1 1 d . . . . .
 N1 N 0.16194(14) 0.8397(5) 0.4516(3) 0.0338(7) Uani 1 1 d . . . . .
 O12 O 0.25283(16) 0.1191(4) 0.0540(3) 0.0547(9) Uani 1 1 d . . . . .
 O3 O 0.05749(13) 0.9005(5) 0.6542(3) 0.0575(9) Uani 1 1 d . . . . .
 N2 N 0.32074(16) 0.3256(5) 0.0723(3) 0.0380(8) Uani 1 1 d . . . . .
 C1 C 0.24615(16) 0.8007(5) 0.3454(3) 0.0294(8) Uani 1 1 d . . . . .
 C4 C 0.22715(17) 0.6297(5) 0.3053(3) 0.0312(8) Uani 1 1 d . . . . .
 O7 O 0.4398(2) 0.0871(6) -0.0193(3) 0.0765(13) Uani 1 1 d . . . . .
 C6 C 0.29547(17) 0.8644(5) 0.3115(3) 0.0334(9) Uani 1 1 d . . . . .
 H6 H 0.307973 0.976099 0.338612 0.040 Uiso 1 1 calc R U . . .
 C8 C 0.12403(17) 0.9583(6) 0.5140(4) 0.0401(10) Uani 1 1 d . . . . .
 H8 H 0.144323 1.066083 0.538764 0.048 Uiso 1 1 calc R U . . .
 C10 C 0.26962(19) 0.2595(5) 0.0985(4) 0.0404(10) Uani 1 1 d . . . . .
 C12 C 0.23812(18) 0.3634(5) 0.1821(3) 0.0368(9) Uani 1 1 d . . . . .
 C14 C 0.40349(19) 0.1391(6) 0.0446(3) 0.0385(10) Uani 1 1 d . . . . .
 C16 C 0.25836(16) 0.5287(5) 0.2276(3) 0.0324(9) Uani 1 1 d . . . . .
 C18 C 0.21242(18) 0.9118(6) 0.4212(3) 0.0312(9) Uani 1 1 d . . . . .
 C20 C 0.10246(17) 0.8670(6) 0.6201(4) 0.0405(9) Uani 1 1 d . . . . .
 C5 C 0.17655(18) 0.5611(5) 0.3390(4) 0.0380(9) Uani 1 1 d . . . . .
 C11 C 0.34262(17) 0.4864(6) 0.1173(3) 0.0393(9) Uani 1 1 d . . . . .
 C21 C 0.32725(18) 0.7614(6) 0.2360(3) 0.0351(9) Uani 1 1 d . . . . .
 H21 H 0.360629 0.805595 0.213495 0.042 Uiso 1 1 calc R U . . .
 C13 C 0.14303(19) 0.6669(6) 0.4182(4) 0.0380(10) Uani 1 1 d . . . . .
 C7 C 0.1881(2) 0.3032(6) 0.2135(4) 0.0501(12) Uani 1 1 d . . . . .
 H7 H 0.174269 0.196475 0.181946 0.060 Uiso 1 1 calc R U . . .
 C15 C 0.30930(18) 0.5964(5) 0.1954(3) 0.0330(9) Uani 1 1 d . . . . .
 C2 C 0.3534(2) 0.2211(6) -0.0101(4) 0.0462(12) Uani 1 1 d . . . . .
 H2 H 0.331172 0.117013 -0.033505 0.055 Uiso 1 1 calc R U . . .
 C17 C 0.3647(3) 0.3294(7) -0.1172(4) 0.0612(16) Uani 1 1 d . . . . .
 H17A H 0.331427 0.371203 -0.149249 0.092 Uiso 1 1 calc R U . . .
 H17B H 0.382927 0.252786 -0.171041 0.092 Uiso 1 1 calc R U . . .
 H17C H 0.386896 0.432830 -0.099117 0.092 Uiso 1 1 calc R U . . .
 C9 C 0.0794(2) 1.0264(8) 0.4385(5) 0.0592(14) Uani 1 1 d . . . . .
 H9A H 0.094314 1.073761 0.369379 0.089 Uiso 1 1 calc R U . . .
 H9B H 0.059946 1.121592 0.476907 0.089 Uiso 1 1 calc R U . . .
 H9C H 0.055422 0.927229 0.421330 0.089 Uiso 1 1 calc R U . . .
 C19 C 0.1576(2) 0.4015(6) 0.2930(5) 0.0500(12) Uani 1 1 d . . . . .
 H19 H 0.124049 0.357726 0.314728 0.060 Uiso 1 1 calc R U . . .
 O2 O 0.4745(2) -0.2527(9) 0.1944(6) 0.0464(16) Uani 0.5 1 d . . P A -1
 H2A H 0.457778 -0.384298 0.191388 0.070 Uiso 0.5 1 d R U P A -1
 H2B H 0.489967 -0.309301 0.268304 0.070 Uiso 0.5 1 d R U P A -1
 O5 O 0.4869(3) -0.1662(12) 0.2803(7) 0.065(2) Uani 0.5 1 d . . P A 1
 H5A H 0.513350 -0.235531 0.294881 0.098 Uiso 0.5 1 d R U P A 1
 H5B H 0.455872 -0.252676 0.252137 0.098 Uiso 0.5 1 d R U P A 1
 O9 O 0.500000 0.000000 0.3899(14) 0.41(2) Uani 1 2 d S T P . .

loop_
  _atom_site_aniso_label
  _atom_site_aniso_U_11
  _atom_site_aniso_U_22
  _atom_site_aniso_U_33
  _atom_site_aniso_U_23
  _atom_site_aniso_U_13
  _atom_site_aniso_U_12
 Cd1 0.0279(2) 0.0624(3) 0.0402(2) 0.000 0.000 -0.0138(2)
 O1 0.0346(15) 0.0489(18) 0.0315(15) 0.0024(13) 0.0002(12) 0.0135(13)
 O4 0.0325(14) 0.0478(17) 0.0325(14) 0.0016(13) -0.0042(11) -0.0083(12)
 O6 0.0459(17) 0.0324(16) 0.0381(16) -0.0082(12) 0.0014(14) -0.0049(13)
 O8 0.072(2) 0.0427(19) 0.0450(17) -0.0122(15) 0.0214(15) -0.0140(17)
 O10 0.054(2) 0.052(2) 0.055(2) 0.0011(16) 0.0121(17) -0.0190(17)
 N1 0.0393(19) 0.0331(18) 0.0289(17) 0.0030(13) -0.0006(14) -0.0036(14)
 O12 0.073(2) 0.0342(16) 0.057(2) -0.0176(15) -0.0198(18) -0.0028(17)
 O3 0.0422(17) 0.075(2) 0.055(2) 0.0167(19) 0.0087(16) 0.0281(17)
 N2 0.057(2) 0.0278(18) 0.0290(17) -0.0082(14) -0.0118(15) 0.0053(16)
 C1 0.041(2) 0.0247(17) 0.0225(17) 0.0044(14) -0.0048(16) -0.0037(16)
 C4 0.043(2) 0.0234(17) 0.0269(18) 0.0048(14) -0.0052(16) -0.0075(17)
 O7 0.104(3) 0.092(3) 0.0344(18) -0.0042(19) 0.002(2) 0.054(3)
 C6 0.046(2) 0.0232(18) 0.031(2) -0.0035(15) -0.0028(17) -0.0110(16)
 C8 0.040(2) 0.040(3) 0.040(2) 0.0045(18) 0.0009(17) 0.0019(18)
 C10 0.057(3) 0.0255(19) 0.039(2) -0.0036(17) -0.021(2) -0.0004(18)
 C12 0.054(3) 0.0217(18) 0.034(2) -0.0012(16) -0.0112(19) -0.0048(18)
 C14 0.057(3) 0.030(2) 0.029(2) -0.0049(16) -0.0061(19) 0.0016(19)
 C16 0.048(2) 0.024(2) 0.0252(16) 0.0016(16) -0.0087(15) -0.0053(18)
 C18 0.041(2) 0.029(2) 0.0235(19) 0.0044(16) -0.0044(16) -0.0060(17)
 C20 0.041(2) 0.045(2) 0.036(2) 0.004(2) 0.0001(19) 0.0091(18)
 C5 0.048(2) 0.030(2) 0.036(2) 0.0053(16) -0.0044(19) -0.0093(17)
 C11 0.060(2) 0.0313(19) 0.0263(16) 0.000(2) -0.0019(17) -0.002(2)
 C21 0.046(2) 0.029(2) 0.030(2) 0.0002(16) 0.0006(18) -0.0076(18)
 C13 0.046(2) 0.031(2) 0.037(2) 0.0064(17) -0.0023(18) -0.0098(19)
 C7 0.064(3) 0.027(2) 0.059(3) -0.008(2) -0.011(2) -0.015(2)
 C15 0.051(2) 0.0236(18) 0.0245(18) -0.0008(16) -0.0050(17) -0.0046(17)
 C2 0.071(3) 0.035(2) 0.032(2) -0.0111(18) -0.015(2) 0.012(2)
 C17 0.106(4) 0.052(3) 0.026(2) -0.009(2) -0.016(3) 0.034(3)
 C9 0.051(3) 0.062(4) 0.064(3) 0.034(3) -0.004(2) 0.006(3)
 C19 0.053(3) 0.032(2) 0.065(3) -0.002(2) -0.002(2) -0.016(2)
 O2 0.035(3) 0.052(4) 0.052(4) 0.024(3) -0.017(3) -0.019(3)
 O5 0.047(5) 0.070(5) 0.079(5) 0.038(4) 0.008(4) 0.013(4)
 O9 0.54(5) 0.56(5) 0.139(13) 0.000 0.000 0.28(4)

_geom_special_details
;
 All esds (except the esd in the dihedral angle between two l.s. planes)
 are estimated using the full covariance matrix.  The cell esds are taken
 into account individually in the estimation of esds in distances, angles
 and torsion angles; correlations between esds in cell parameters are only
 used when they are defined by crystal symmetry.  An approximate (isotropic)
 treatment of cell esds is used for estimating esds involving l.s. planes.
;
loop_
  _geom_bond_atom_site_label_1
  _geom_bond_atom_site_label_2
  _geom_bond_distance
  _geom_bond_site_symmetry_2
  _geom_bond_publ_flag
 Cd1 Cd1 0.0000(8) 2_655 ?
 Cd1 O4 2.511(3) . ?
 Cd1 O4 2.511(3) 2_655 ?
 Cd1 O7 2.277(4) 2_655 ?
 Cd1 O7 2.277(4) . ?
 Cd1 C14 2.740(5) 2_655 ?
 Cd1 O2 2.160(6) . ?
 Cd1 O5 2.309(7) . ?
 Cd1 O5 2.309(7) 2_655 ?
 O1 H1 0.8200 . ?
 O1 C20 1.311(5) . ?
 O4 C14 1.247(5) . ?
 O6 C18 1.217(5) . ?
 O8 C11 1.226(5) . ?
 O10 C13 1.211(5) . ?
 N1 C8 1.476(5) . ?
 N1 C18 1.409(5) . ?
 N1 C13 1.404(5) . ?
 O12 C10 1.226(5) . ?
 O3 C20 1.214(5) . ?
 N2 C10 1.395(6) . ?
 N2 C11 1.399(5) . ?
 N2 C2 1.478(6) . ?
 C1 C4 1.417(5) . ?
 C1 C6 1.372(6) . ?
 C1 C18 1.470(6) . ?
 C4 C16 1.409(6) . ?
 C4 C5 1.412(6) . ?
 O7 C14 1.236(6) . ?
 C6 H6 0.9300 . ?
 C6 C21 1.408(6) . ?
 C8 H8 0.9800 . ?
 C8 C20 1.516(6) . ?
 C8 C9 1.507(6) . ?
 C10 C12 1.470(6) . ?
 C12 C16 1.414(5) . ?
 C12 C7 1.372(7) . ?
 C14 C2 1.526(6) . ?
 C16 C15 1.413(6) . ?
 C5 C13 1.471(7) . ?
 C5 C19 1.369(6) . ?
 C11 C15 1.476(6) . ?
 C21 H21 0.9300 . ?
 C21 C15 1.372(6) . ?
 C7 H7 0.9300 . ?
 C7 C19 1.402(8) . ?
 C2 H2 0.9800 . ?
 C2 C17 1.516(7) . ?
 C17 H17A 0.9600 . ?
 C17 H17B 0.9600 . ?
 C17 H17C 0.9600 . ?
 C9 H9A 0.9600 . ?
 C9 H9B 0.9600 . ?
 C9 H9C 0.9600 . ?
 C19 H19 0.9300 . ?
 O2 H2A 1.0484 . ?
 O2 H2B 1.0373 . ?
 O2 O5 1.232(11) . ?
 O5 H5A 0.8491 . ?
 O5 H5B 1.0511 . ?

loop_
  _geom_angle_atom_site_label_1
  _geom_angle_atom_site_label_2
  _geom_angle_atom_site_label_3
  _geom_angle
  _geom_angle_site_symmetry_1
  _geom_angle_site_symmetry_3
  _geom_angle_publ_flag
 Cd1 Cd1 O4 0(10) 2_655 . ?
 Cd1 Cd1 O4 0(10) 2_655 2_655 ?
 Cd1 Cd1 O7 0(10) 2_655 . ?
 Cd1 Cd1 O7 0(10) 2_655 2_655 ?
 Cd1 Cd1 C14 0(10) 2_655 2_655 ?
 Cd1 Cd1 O2 0(10) 2_655 . ?
 Cd1 Cd1 O5 0(10) 2_655 2_655 ?
 Cd1 Cd1 O5 0(10) 2_655 . ?
 O4 Cd1 O4 161.98(13) 2_655 . ?
 O4 Cd1 C14 27.02(11) 2_655 2_655 ?
 O4 Cd1 C14 170.66(11) . 2_655 ?
 O7 Cd1 O4 144.53(12) . 2_655 ?
 O7 Cd1 O4 53.45(12) . . ?
 O7 Cd1 O4 53.45(12) 2_655 2_655 ?
 O7 Cd1 O4 144.53(12) 2_655 . ?
 O7 Cd1 O7 91.27(19) . 2_655 ?
 O7 Cd1 C14 117.80(13) . 2_655 ?
 O7 Cd1 C14 26.53(13) 2_655 2_655 ?
 O7 Cd1 O5 122.2(2) . 2_655 ?
 O7 Cd1 O5 122.2(2) 2_655 . ?
 O7 Cd1 O5 129.8(2) . . ?
 O7 Cd1 O5 129.8(2) 2_655 2_655 ?
 O2 Cd1 O4 86.90(19) . . ?
 O2 Cd1 O4 85.41(18) . 2_655 ?
 O2 Cd1 O7 110.2(2) . . ?
 O2 Cd1 O7 104.7(2) . 2_655 ?
 O2 Cd1 C14 94.1(2) . 2_655 ?
 O2 Cd1 O5 97.6(3) . 2_655 ?
 O2 Cd1 O5 31.8(3) . . ?
 O5 Cd1 O4 85.01(18) 2_655 2_655 ?
 O5 Cd1 O4 79.88(18) 2_655 . ?
 O5 Cd1 O4 85.01(18) . . ?
 O5 Cd1 O4 79.88(18) . 2_655 ?
 O5 Cd1 C14 100.72(19) . 2_655 ?
 O5 Cd1 C14 109.14(19) 2_655 2_655 ?
 O5 Cd1 O5 66.0(5) 2_655 . ?
 C20 O1 H1 109.5 . . ?
 Cd1 O4 Cd1 0.000(18) 2_655 . ?
 C14 O4 Cd1 86.8(3) . . ?
 C14 O4 Cd1 86.8(3) . 2_655 ?
 C18 N1 C8 118.5(3) . . ?
 C13 N1 C8 116.9(3) . . ?
 C13 N1 C18 124.3(4) . . ?
 C10 N2 C11 124.2(4) . . ?
 C10 N2 C2 117.9(4) . . ?
 C11 N2 C2 117.9(4) . . ?
 C4 C1 C18 119.9(4) . . ?
 C6 C1 C4 120.1(4) . . ?
 C6 C1 C18 120.0(3) . . ?
 C16 C4 C1 119.6(4) . . ?
 C16 C4 C5 119.2(3) . . ?
 C5 C4 C1 121.1(4) . . ?
 Cd1 O7 Cd1 0.000(14) 2_655 . ?
 C14 O7 Cd1 98.1(3) . . ?
 C14 O7 Cd1 98.1(3) . 2_655 ?
 C1 C6 H6 119.8 . . ?
 C1 C6 C21 120.3(4) . . ?
 C21 C6 H6 119.8 . . ?
 N1 C8 H8 106.9 . . ?
 N1 C8 C20 112.2(3) . . ?
 N1 C8 C9 111.8(4) . . ?
 C20 C8 H8 106.9 . . ?
 C9 C8 H8 106.9 . . ?
 C9 C8 C20 111.7(4) . . ?
 O12 C10 N2 120.4(4) . . ?
 O12 C10 C12 122.5(5) . . ?
 N2 C10 C12 117.1(3) . . ?
 C16 C12 C10 120.3(4) . . ?
 C7 C12 C10 120.0(4) . . ?
 C7 C12 C16 119.7(4) . . ?
 O4 C14 C2 121.2(4) . . ?
 O7 C14 O4 121.2(4) . . ?
 O7 C14 C2 117.5(4) . . ?
 C4 C16 C12 119.8(4) . . ?
 C4 C16 C15 119.1(3) . . ?
 C15 C16 C12 121.1(4) . . ?
 O6 C18 N1 119.9(4) . . ?
 O6 C18 C1 122.9(4) . . ?
 N1 C18 C1 117.2(3) . . ?
 O1 C20 C8 114.9(4) . . ?
 O3 C20 O1 124.3(4) . . ?
 O3 C20 C8 120.7(4) . . ?
 C4 C5 C13 119.8(4) . . ?
 C19 C5 C4 119.9(4) . . ?
 C19 C5 C13 120.2(4) . . ?
 O8 C11 N2 119.3(4) . . ?
 O8 C11 C15 122.4(4) . . ?
 N2 C11 C15 118.3(4) . . ?
 C6 C21 H21 119.8 . . ?
 C15 C21 C6 120.5(4) . . ?
 C15 C21 H21 119.8 . . ?
 O10 C13 N1 119.6(4) . . ?
 O10 C13 C5 122.9(4) . . ?
 N1 C13 C5 117.4(4) . . ?
 C12 C7 H7 119.8 . . ?
 C12 C7 C19 120.5(4) . . ?
 C19 C7 H7 119.8 . . ?
 C16 C15 C11 118.8(3) . . ?
 C21 C15 C16 120.4(4) . . ?
 C21 C15 C11 120.8(4) . . ?
 N2 C2 C14 112.0(3) . . ?
 N2 C2 H2 106.0 . . ?
 N2 C2 C17 112.3(4) . . ?
 C14 C2 H2 106.0 . . ?
 C17 C2 C14 113.9(5) . . ?
 C17 C2 H2 106.0 . . ?
 C2 C17 H17A 109.5 . . ?
 C2 C17 H17B 109.5 . . ?
 C2 C17 H17C 109.5 . . ?
 H17A C17 H17B 109.5 . . ?
 H17A C17 H17C 109.5 . . ?
 H17B C17 H17C 109.5 . . ?
 C8 C9 H9A 109.5 . . ?
 C8 C9 H9B 109.5 . . ?
 C8 C9 H9C 109.5 . . ?
 H9A C9 H9B 109.5 . . ?
 H9A C9 H9C 109.5 . . ?
 H9B C9 H9C 109.5 . . ?
 C5 C19 C7 120.9(5) . . ?
 C5 C19 H19 119.6 . . ?
 C7 C19 H19 119.6 . . ?
 Cd1 O2 H2A 152.3 . . ?
 Cd1 O2 H2B 126.2 . . ?
 H2A O2 H2B 79.1 . . ?
 O5 O2 Cd1 80.8(5) . . ?
 O5 O2 H2A 126.7 . . ?
 O5 O2 H2B 54.8 . . ?
 Cd1 O5 Cd1 0.000(11) 2_655 . ?
 Cd1 O5 H5A 111.9 . . ?
 Cd1 O5 H5A 111.9 2_655 . ?
 Cd1 O5 H5B 98.9 . . ?
 Cd1 O5 H5B 98.9 2_655 . ?
 O2 O5 Cd1 67.4(4) . 2_655 ?
 O2 O5 Cd1 67.4(4) . . ?
 O2 O5 H5A 93.1 . . ?
 O2 O5 H5B 41.3 . . ?
 H5A O5 H5B 105.9 . . ?

loop_
  _geom_hbond_atom_site_label_D
  _geom_hbond_atom_site_label_H
  _geom_hbond_atom_site_label_A
  _geom_hbond_distance_DH
  _geom_hbond_distance_HA
  _geom_hbond_distance_DA
  _geom_hbond_angle_DHA
  _geom_hbond_site_symmetry_A
  _geom_hbond_publ_flag
 O1 H1 O4 0.82 1.76 2.582(4) 175.7 3_556 yes

loop_
  _geom_torsion_atom_site_label_1
  _geom_torsion_atom_site_label_2
  _geom_torsion_atom_site_label_3
  _geom_torsion_atom_site_label_4
  _geom_torsion
  _geom_torsion_site_symmetry_1
  _geom_torsion_site_symmetry_2
  _geom_torsion_site_symmetry_3
  _geom_torsion_site_symmetry_4
  _geom_torsion_publ_flag
 Cd1 O4 C14 O7 6.5(5) . . . . ?
 Cd1 O4 C14 O7 6.5(5) 2_655 . . . ?
 Cd1 O4 C14 C2 -178.1(4) 2_655 . . . ?
 Cd1 O4 C14 C2 -178.1(4) . . . . ?
 Cd1 O7 C14 O4 -7.2(5) . . . . ?
 Cd1 O7 C14 O4 -7.2(5) 2_655 . . . ?
 Cd1 O7 C14 C2 177.2(3) 2_655 . . . ?
 Cd1 O7 C14 C2 177.2(3) . . . . ?
 Cd1 O2 O5 Cd1 0.000(0) . . . 2_655 ?
 O4 C14 C2 N2 21.2(6) . . . . ?
 O4 C14 C2 C17 149.9(4) . . . . ?
 O8 C11 C15 C16 -173.5(4) . . . . ?
 O8 C11 C15 C21 6.6(6) . . . . ?
 N1 C8 C20 O1 35.7(5) . . . . ?
 N1 C8 C20 O3 -148.5(4) . . . . ?
 O12 C10 C12 C16 -177.4(4) . . . . ?
 O12 C10 C12 C7 0.4(6) . . . . ?
 N2 C10 C12 C16 3.7(6) . . . . ?
 N2 C10 C12 C7 -178.5(4) . . . . ?
 N2 C11 C15 C16 4.3(5) . . . . ?
 N2 C11 C15 C21 -175.6(4) . . . . ?
 C1 C4 C16 C12 -176.2(3) . . . . ?
 C1 C4 C16 C15 3.0(5) . . . . ?
 C1 C4 C5 C13 -0.8(6) . . . . ?
 C1 C4 C5 C19 175.6(4) . . . . ?
 C1 C6 C21 C15 0.0(6) . . . . ?
 C4 C1 C6 C21 0.6(6) . . . . ?
 C4 C1 C18 O6 -176.9(3) . . . . ?
 C4 C1 C18 N1 0.6(5) . . . . ?
 C4 C16 C15 C11 177.7(3) . . . . ?
 C4 C16 C15 C21 -2.3(6) . . . . ?
 C4 C5 C13 O10 -178.5(4) . . . . ?
 C4 C5 C13 N1 3.9(6) . . . . ?
 C4 C5 C19 C7 0.8(7) . . . . ?
 O7 C14 C2 N2 -163.3(5) . . . . ?
 O7 C14 C2 C17 -34.5(6) . . . . ?
 C6 C1 C4 C16 -2.1(5) . . . . ?
 C6 C1 C4 C5 180.0(4) . . . . ?
 C6 C1 C18 O6 1.7(6) . . . . ?
 C6 C1 C18 N1 179.2(3) . . . . ?
 C6 C21 C15 C16 0.9(6) . . . . ?
 C6 C21 C15 C11 -179.2(4) . . . . ?
 C8 N1 C18 O6 6.1(5) . . . . ?
 C8 N1 C18 C1 -171.4(3) . . . . ?
 C8 N1 C13 O10 -8.4(6) . . . . ?
 C8 N1 C13 C5 169.3(4) . . . . ?
 C10 N2 C11 O8 176.4(4) . . . . ?
 C10 N2 C11 C15 -1.5(6) . . . . ?
 C10 N2 C2 C14 -114.6(4) . . . . ?
 C10 N2 C2 C17 115.9(5) . . . . ?
 C10 C12 C16 C4 178.2(3) . . . . ?
 C10 C12 C16 C15 -0.9(6) . . . . ?
 C10 C12 C7 C19 -179.8(4) . . . . ?
 C12 C16 C15 C11 -3.1(6) . . . . ?
 C12 C16 C15 C21 176.8(4) . . . . ?
 C12 C7 C19 C5 1.4(8) . . . . ?
 C16 C4 C5 C13 -178.7(4) . . . . ?
 C16 C4 C5 C19 -2.3(6) . . . . ?
 C16 C12 C7 C19 -1.9(7) . . . . ?
 C18 N1 C8 C20 -128.8(4) . . . . ?
 C18 N1 C8 C9 104.7(4) . . . . ?
 C18 N1 C13 O10 177.3(4) . . . . ?
 C18 N1 C13 C5 -5.0(6) . . . . ?
 C18 C1 C4 C16 176.4(3) . . . . ?
 C18 C1 C4 C5 -1.5(6) . . . . ?
 C18 C1 C6 C21 -177.9(4) . . . . ?
 C5 C4 C16 C12 1.8(5) . . . . ?
 C5 C4 C16 C15 -179.1(4) . . . . ?
 C11 N2 C10 O12 178.7(4) . . . . ?
 C11 N2 C10 C12 -2.4(6) . . . . ?
 C11 N2 C2 C14 66.7(5) . . . . ?
 C11 N2 C2 C17 -62.9(5) . . . . ?
 C13 N1 C8 C20 56.6(5) . . . . ?
 C13 N1 C8 C9 -69.9(5) . . . . ?
 C13 N1 C18 O6 -179.7(4) . . . . ?
 C13 N1 C18 C1 2.8(5) . . . . ?
 C13 C5 C19 C7 177.2(5) . . . . ?
 C7 C12 C16 C4 0.4(6) . . . . ?
 C7 C12 C16 C15 -178.8(4) . . . . ?
 C2 N2 C10 O12 0.0(6) . . . . ?
 C2 N2 C10 C12 178.9(3) . . . . ?
 C2 N2 C11 O8 -5.0(6) . . . . ?
 C2 N2 C11 C15 177.1(3) . . . . ?
 C9 C8 C20 O1 162.3(4) . . . . ?
 C9 C8 C20 O3 -22.0(6) . . . . ?
 C19 C5 C13 O10 5.1(7) . . . . ?
 C19 C5 C13 N1 -172.5(4) . . . . ?

_smtbx_masks_special_details
;
A solvent mask was calculated and 64 electrons were 
found in a volume of 276\%A^3^ in 1 void per unit cell. 
This is consistent with the presence of 
3.2[H2O] per Asymmetric Unit 
which account for 64 electrons 
per unit cell.
;
loop_
  _smtbx_masks_void_nr
  _smtbx_masks_void_average_x
  _smtbx_masks_void_average_y
  _smtbx_masks_void_average_z
  _smtbx_masks_void_volume
  _smtbx_masks_void_count_electrons
  _smtbx_masks_void_content
 1 0.000 -0.953 0.197 137.9 32.2 '3.2 water'
 2 0.500 0.396 0.803 137.9 32.6 '3.2 water'

_smtbx_masks_void_probe_radius     1.2
_smtbx_masks_void_truncation_radius  1.2
_shelx_res_file
;
TITL 1_a.res in P2(1)2(1)2
    1_a.res
    created by SHELXL-2018/3 at 14:31:07 on 02-Apr-2023
REM Old TITL 1 in P2(1)2(1)2
REM SHELXT solution in P2(1)2(1)2
REM R1 0.150, Rweak 0.039, Alpha 0.009, Orientation as input
REM Flack x = 0.035 ( 0.008 ) from Parsons' quotients
REM Formula found by SHELXT: C44 N6 O14 Cd
CELL 0.71073 24.8907 7.3061 11.7772 90 90 90
ZERR 2 0.0023 0.0007 0.0011 0 0 0
LATT -1
SYMM -X,-Y,+Z
SYMM 0.5-X,0.5+Y,-Z
SYMM 0.5+X,0.5-Y,-Z
SFAC C H Cd N O
UNIT 80 60 2 8 38
EQIV $1 1-X,-Y,+Z
EQIV $2 0.5-X,0.5+Y,1-Z

L.S. 18
PLAN  27
SIZE 0.2 0.23 0.25
TEMP 23
CONF
HTAB O1 O4_$2
FREE C14 Cd1_$1
FREE C14 Cd1
FREE H5b Cd1
FREE H5b Cd1_$1
FREE O9 O5_$1
FREE O9 O5
BOND $H
LIST 6
MORE -1
ABIN
fmap 2
acta
OMIT 4 0 0
OMIT 1 1 0
OMIT 2 0 0
REM <olex2.extras>
REM <HklSrc "%.\\1_a.hkl">
REM </olex2.extras>

WGHT    0.046200    1.403000
FVAR       0.56806
CD1   3    0.500000    0.000000    0.115869    10.50000    0.02789    0.06237 =
         0.04020    0.00000    0.00000   -0.01384
O1    5    0.136967    0.762214    0.673583    11.00000    0.03459    0.04892 =
         0.03152    0.00236    0.00022    0.01353
AFIX 147
H1    2    0.122949    0.720769    0.731106    11.00000   -1.50000
AFIX   0
O4    5    0.406256    0.114984    0.149257    11.00000    0.03245    0.04783 =
         0.03255    0.00161   -0.00419   -0.00829
O6    5    0.225611    1.062923    0.454567    11.00000    0.04593    0.03241 =
         0.03814   -0.00817    0.00140   -0.00488
O8    5    0.388989    0.528209    0.093415    11.00000    0.07181    0.04273 =
         0.04503   -0.01222    0.02143   -0.01400
O10   5    0.099777    0.613816    0.451961    11.00000    0.05408    0.05214 =
         0.05525    0.00109    0.01205   -0.01901
N1    4    0.161936    0.839735    0.451617    11.00000    0.03930    0.03307 =
         0.02888    0.00299   -0.00058   -0.00363
O12   5    0.252828    0.119076    0.054006    11.00000    0.07314    0.03419 =
         0.05675   -0.01757   -0.01981   -0.00280
O3    5    0.057487    0.900529    0.654179    11.00000    0.04215    0.07518 =
         0.05523    0.01669    0.00869    0.02815
N2    4    0.320737    0.325589    0.072309    11.00000    0.05718    0.02777 =
         0.02896   -0.00820   -0.01179    0.00532
C1    1    0.246155    0.800702    0.345387    11.00000    0.04095    0.02470 =
         0.02252    0.00437   -0.00481   -0.00370
C4    1    0.227152    0.629659    0.305279    11.00000    0.04342    0.02337 =
         0.02689    0.00480   -0.00519   -0.00748
O7    5    0.439817    0.087067   -0.019296    11.00000    0.10356    0.09151 =
         0.03435   -0.00424    0.00204    0.05401
C6    1    0.295467    0.864372    0.311537    11.00000    0.04585    0.02319 =
         0.03117   -0.00347   -0.00283   -0.01098
AFIX  43
H6    2    0.307973    0.976099    0.338612    11.00000   -1.20000
AFIX   0
C8    1    0.124034    0.958304    0.513965    11.00000    0.03996    0.04028 =
         0.03999    0.00453    0.00088    0.00193
AFIX  13
H8    2    0.144323    1.066083    0.538764    11.00000   -1.20000
AFIX   0
C10   1    0.269625    0.259526    0.098495    11.00000    0.05684    0.02546 =
         0.03894   -0.00358   -0.02053   -0.00036
C12   1    0.238121    0.363401    0.182129    11.00000    0.05449    0.02168 =
         0.03418   -0.00124   -0.01125   -0.00477
C14   1    0.403489    0.139138    0.044602    11.00000    0.05692    0.02983 =
         0.02864   -0.00487   -0.00610    0.00165
C16   1    0.258355    0.528676    0.227620    11.00000    0.04807    0.02378 =
         0.02523    0.00165   -0.00870   -0.00528
C18   1    0.212419    0.911809    0.421240    11.00000    0.04072    0.02932 =
         0.02353    0.00443   -0.00443   -0.00599
C20   1    0.102459    0.866985    0.620144    11.00000    0.04088    0.04498 =
         0.03576    0.00417    0.00005    0.00908
C5    1    0.176550    0.561087    0.338954    11.00000    0.04820    0.02975 =
         0.03591    0.00532   -0.00437   -0.00934
C11   1    0.342624    0.486383    0.117263    11.00000    0.06034    0.03129 =
         0.02630    0.00013   -0.00189   -0.00161
C21   1    0.327245    0.761412    0.235999    11.00000    0.04637    0.02875 =
         0.03014    0.00021    0.00062   -0.00755
AFIX  43
H21   2    0.360629    0.805595    0.213495    11.00000   -1.20000
AFIX   0
C13   1    0.143025    0.666923    0.418180    11.00000    0.04561    0.03121 =
         0.03721    0.00641   -0.00226   -0.00977
C7    1    0.188078    0.303221    0.213550    11.00000    0.06440    0.02680 =
         0.05903   -0.00802   -0.01087   -0.01523
AFIX  43
H7    2    0.174269    0.196475    0.181946    11.00000   -1.20000
AFIX   0
C15   1    0.309302    0.596364    0.195368    11.00000    0.05088    0.02365 =
         0.02449   -0.00076   -0.00504   -0.00458
C2    1    0.353389    0.221106   -0.010064    11.00000    0.07114    0.03548 =
         0.03199   -0.01112   -0.01489    0.01186
AFIX  13
H2    2    0.331172    0.117013   -0.033505    11.00000   -1.20000
AFIX   0
C17   1    0.364696    0.329406   -0.117184    11.00000    0.10556    0.05230 =
         0.02577   -0.00875   -0.01595    0.03365
AFIX 137
H17A  2    0.331427    0.371203   -0.149249    11.00000   -1.50000
H17B  2    0.382927    0.252786   -0.171041    11.00000   -1.50000
H17C  2    0.386896    0.432830   -0.099117    11.00000   -1.50000
AFIX   0
C9    1    0.079375    1.026404    0.438549    11.00000    0.05139    0.06196 =
         0.06432    0.03450   -0.00435    0.00570
AFIX 137
H9A   2    0.094314    1.073761    0.369379    11.00000   -1.50000
H9B   2    0.059946    1.121592    0.476907    11.00000   -1.50000
H9C   2    0.055422    0.927229    0.421330    11.00000   -1.50000
AFIX   0
C19   1    0.157590    0.401508    0.292983    11.00000    0.05310    0.03225 =
         0.06463   -0.00194   -0.00205   -0.01604
AFIX  43
H19   2    0.124049    0.357726    0.314728    11.00000   -1.20000
AFIX   0
PART -1
O2    5    0.474503   -0.252688    0.194443    10.50000    0.03530    0.05196 =
         0.05198    0.02354   -0.01688   -0.01875
AFIX   7
H2A   2    0.457778   -0.384298    0.191388    10.50000   -1.50000
H2B   2    0.489967   -0.309301    0.268304    10.50000   -1.50000
AFIX   0
PART 1
O5    5    0.486865   -0.166153    0.280321    10.50000    0.04710    0.06973 =
         0.07931    0.03840    0.00799    0.01295
AFIX   7
H5A   2    0.513350   -0.235531    0.294881    10.50000   -1.50000
H5B   2    0.455872   -0.252676    0.252137    10.50000   -1.50000
AFIX   0
PART 0
O9    5    0.500000    0.000000    0.389931    10.50000    0.54411    0.55785 =
         0.13861    0.00000    0.00000    0.27743
HKLF 4


REM  1_a.res in P2(1)2(1)2
REM wR2 = 0.0822, GooF = S = 1.027, Restrained GooF = 1.027 for all data
REM R1 = 0.0305 for 3748 Fo > 4sig(Fo) and 0.0326 for all 3935 data
REM 304 parameters refined using 0 restraints

END

WGHT      0.0450      1.3557

REM Highest difference peak  0.880,  deepest hole -0.424,  1-sigma level  0.056
Q1    1   0.4767 -0.3133  0.0956  11.00000  0.05    0.88
Q2    1   0.5222 -0.3080  0.0884  11.00000  0.05    0.54
Q3    1   0.4713 -0.0948  0.3708  11.00000  0.05    0.45
Q4    1   0.5000  0.0000  0.1813  10.50000  0.05    0.41
Q5    1   0.4689  0.0995  0.3679  11.00000  0.05    0.29
Q6    1   0.4942 -0.0304  0.4816  11.00000  0.05    0.27
Q7    1   0.4627  0.0099  0.1119  11.00000  0.05    0.25
Q8    1   0.4229  0.0838 -0.0227  11.00000  0.05    0.20
Q9    1   0.4565 -0.2050  0.1064  11.00000  0.05    0.19
Q10   1   0.1639  0.1748  0.1526  11.00000  0.05    0.18
Q11   1   0.2580  0.5338  0.2962  11.00000  0.05    0.17
Q12   1   0.4566  0.1568 -0.0189  11.00000  0.05    0.16
Q13   1   0.1677  0.6122  0.3839  11.00000  0.05    0.15
Q14   1   0.3003  0.0045  0.1438  11.00000  0.05    0.15
Q15   1   0.2716  0.0569  0.2034  11.00000  0.05    0.15
Q16   1   0.3988  0.6463  0.1217  11.00000  0.05    0.15
Q17   1   0.2496  0.1323  0.1176  11.00000  0.05    0.14
Q18   1   0.5000  0.0000  0.3020  10.50000  0.05    0.14
Q19   1   0.4020  0.2302  0.1131  11.00000  0.05    0.14
Q20   1   0.0510  0.7873  0.6126  11.00000  0.05    0.14
Q21   1   0.3690  0.2489 -0.1774  11.00000  0.05    0.14
Q22   1   0.2799  0.5650  0.1937  11.00000  0.05    0.14
Q23   1   0.3069  0.5622  0.3256  11.00000  0.05    0.14
Q24   1   0.4338  0.0275  0.3818  11.00000  0.05    0.13
Q25   1   0.4979 -0.3121  0.2136  11.00000  0.05    0.13
Q26   1   0.4219 -0.0813 -0.0464  11.00000  0.05    0.13
Q27   1   0.3287  0.5167  0.1797  11.00000  0.05    0.13
;
_shelx_res_checksum                2805
_shelx_hkl_file
;
   0   1   0   -0.80    0.70
   0  -1   0   -0.90    0.60
   0   1   0   -1.20    0.80
   0   1   0   -2.10    0.80
   0  -1   0   -1.20    0.70
   0  -1   0   -1.60    0.70
   0   2   0 1222.88   42.80
   0  -2   0 1270.47   43.50
   0  -2   0 1252.07   43.40
   0  -2   0 1288.27   42.90
   0   2   0 1228.38   43.30
   0   3   0   -0.10    1.60
   0  -3   0   -1.20    1.20
   0   3   0   -0.40    1.30
   0  -3   0    1.10    1.60
   0   4   0   62.79    4.70
   0   4   0   74.49    5.90
   0  -4   0   65.29    4.60
   0  -4   0   69.09    5.40
   0   5   0    0.70    2.30
   0  -5   0   -3.50    2.00
   0  -6   0  104.49    7.10
   0  -6   0   89.89    7.50
   0   6   0   91.49    7.90
   0  -7   0    1.20    3.40
   0   7   0   -0.60    3.40
   0  -7   0   -0.60    2.60
   0  -8   0  169.28   12.40
   0   8   0  197.08   13.40
   0   0   1 1520.75   50.09
   0   0   1 1489.45   49.80
   0   0  -1 1530.85   49.90
   0   0  -1 1435.26   49.99
   0  -1   1  319.57   11.30
   0   1   1  315.47   11.50
   0  -1   1  321.37   11.40
   0   1  -1  303.57   11.30
   0   1   1  315.47   11.20
   0   1  -1  315.27   11.50
   0  -1  -1  312.27   11.10
   0   1  -1  326.97   11.90
   0  -1  -1  315.77   11.50
   0  -2   1   11.70    1.70
   0   2   1   10.10    1.90
   0  -2  -1   13.10    2.00
   0  -2  -1   16.60    1.90
   0  -2   1   14.60    2.10
   0   2  -1   12.20    2.20
   0  -2  -1   14.60    1.80
   0  -2   1   13.60    1.90
   0   2   1   14.40    2.00
   0  -2   1   11.00    1.60
   0  -2  -1   13.70    2.20
   0   2  -1   13.70    2.10
   0  -3  -1  177.68    8.50
   0   3  -1  191.18    9.00
   0  -3   1  193.88   10.00
   0  -3   1  199.38    8.40
   0  -3  -1  202.08    9.10
   0  -3   1  205.48    8.50
   0   3   1  186.28    8.60
   0   3   1  195.68    9.20
   0  -3  -1  196.38    8.50
   0   3  -1  197.18    9.70
   0  -4   1  886.11   30.90
   0   4   1  852.01   31.80
   0   4  -1  833.62   31.60
   0  -4   1  846.72   30.70
   0   4   1  847.32   31.10
   0  -4  -1  813.22   31.00
   0  -4   1  861.51   31.80
   0  -5  -1  219.18   10.60
   0   5  -1  207.58   11.10
   0  -5   1  198.18    9.80
   0   5   1  186.78   10.00
   0   5   1  204.98   11.10
   0  -5   1  219.88   11.20
   0   6  -1  252.67   13.70
   0  -6   1  248.68   13.40
   0  -6   1  256.27   12.20
   0  -6  -1  252.47   12.80
   0   6   1  246.58   12.50
   0   6   1  260.87   13.60
   0   7   1   29.30    5.60
   0  -7   1   24.90    5.20
   0   7  -1   24.60    5.30
   0  -7   1   40.80    5.20
   0  -7  -1   40.90    5.60
   0  -7  -1   27.50    5.20
   0  -8  -1  119.19   10.00
   0  -8   1  106.99   10.20
   0   8   1  120.49   10.70
   0   8  -1  123.99   10.90
   0   0   2  217.98    8.60
   0   0  -2  220.48    8.60
   0   0  -2  220.58    8.10
   0   0  -2  217.38    8.10
   0   0   2  212.48    8.00
   0   0   2  228.88    8.10
   0   1   2 1288.17   43.90
   0  -1  -2 1257.07   43.80
   0  -1   2 1295.17   43.40
   0   1  -2 1326.97   43.70
   0   1   2 1304.17   42.90
   0  -1   2 1333.97   44.10
   0   1  -2 1261.27   43.50
   0  -1  -2 1276.27   42.80
   0   1  -2 1275.07   44.10
   0  -1  -2 1130.99   43.60
   0  -1  -2 1296.87   43.60
   0  -1   2 1296.17   43.60
   0  -2  -2 1373.06   46.90
   0   2   2 1356.96   47.80
   0  -2   2 1389.56   47.30
   0  -2   2 1410.96   47.60
   0   2   2 1380.66   47.90
   0  -2  -2 1405.56   47.70
   0   2  -2 1367.46   48.40
   0   2  -2 1384.16   47.50
   0   2  -2 1372.46   47.70
   0  -3   2   35.60    3.00
   0   3  -2   28.00    3.80
   0   3   2   36.80    3.90
   0   3   2   31.50    3.40
   0  -3  -2   31.80    3.20
   0   3  -2   26.60    3.30
   0  -3  -2   33.70    3.00
   0  -3  -2   31.70    3.30
   0  -4   2   48.50    4.00
   0   4  -2   43.80    4.80
   0  -4  -2   44.50    4.10
   0   4   2   46.30    4.90
   0   4   2   42.30    4.50
   0  -4   2   48.40    3.90
   0  -5   2   31.50    4.80
   0  -5   2   38.30    4.00
   0  -5  -2   34.40    4.30
   0   5  -2   40.10    5.10
   0   5   2   28.30    4.60
   0   5   2   40.70    4.60
   0  -6  -2   47.90    5.50
   0   6   2   47.10    6.10
   0   6  -2   47.50    6.00
   0  -6   2   45.90    4.90
   0   6   2   49.90    5.70
   0  -6   2   55.69    6.80
   0   7   2  137.79   10.70
   0   7  -2  144.99   10.70
   0   7   2  132.19    9.40
   0  -7   2  154.38    8.80
   0  -7  -2  121.99    9.10
   0  -7   2  129.99   10.50
   0   8  -2   36.80    6.60
   0   8   2   35.00    6.70
   0  -8   2   36.50    6.90
   0  -8  -2   37.10    6.00
   0   0   3  279.47   10.20
   0   0   3  271.17   10.90
   0   0  -3  269.77   10.80
   0   0   3  278.77   10.00
   0   0  -3  279.17   10.20
   0   0  -3  272.97   10.20
   0  -1   3 3765.82  127.89
   0  -1  -3 3778.22  127.69
   0   1  -3 3860.71  128.09
   0  -1   3 3817.62  127.49
   0   1   3 3789.02  127.89
   0  -1  -3 3747.73  126.79
   0   1   3 3776.12  128.29
   0   1  -3 3929.11  127.79
   0  -1   3 3920.41  128.19
   0   1   3 3882.61  126.79
   0   1  -3 3768.42  128.29
   0  -1  -3 3719.23  128.19
   0   2   3 1673.43   59.39
   0   2  -3 1653.73   58.89
   0   2  -3 1836.12   59.09
   0  -2   3 1704.73   58.79
   0  -2  -3 1723.03   59.09
   0  -2  -3 1706.53   57.79
   0  -2   3 1745.43   58.79
   0   2   3 1767.72   58.19
   0  -2  -3 1709.93   59.29
   0   2  -3 1685.93   59.99
   0  -3  -3  665.13   24.30
   0   3  -3  654.83   24.80
   0   3  -3  656.53   25.90
   0  -3  -3  665.93   23.60
   0   3   3  649.04   24.90
   0   3   3  669.03   24.90
   0  -3   3  675.03   24.20
   0   3  -3  667.23   24.50
   0  -4   3  612.04   22.80
   0   4  -3  589.64   23.80
   0  -4  -3  612.54   22.60
   0   4   3  614.74   24.00
   0   4   3  612.74   23.80
   0   4  -3  606.64   25.20
   0   5   3    7.90    3.00
   0  -5   3    5.50    3.10
   0  -5   3    7.60    2.40
   0   5  -3   10.60    3.20
   0   5   3   10.40    3.20
   0  -5  -3    4.30    2.40
   0  -6  -3  142.19    8.60
   0   6   3  134.79    9.20
   0   6  -3  124.19    9.30
   0  -6   3  153.88    8.40
   0  -6   3  130.09    9.70
   0   6   3  135.59    9.70
   0  -7   3   16.40    3.50
   0  -7  -3   18.30    4.20
   0   7   3   19.70    5.00
   0   7  -3   15.50    4.70
   0   7   3   13.50    4.40
   0  -7   3   15.40    5.40
   0  -8  -3   -2.90    3.30
   0   8   3    5.60    4.50
   0  -8   3    2.70    4.20
   0   8  -3    6.90    4.30
   0   0   4 2370.76   78.39
   0   0  -4 2006.70   79.29
   0   0   4 2352.26   79.69
   0   0  -4 2471.25   78.89
   0   0   4 2445.96   78.79
   0   0  -4 2350.76   78.69
   0   1  -4  546.95   19.20
   0  -1  -4  514.25   18.90
   0  -1  -4  510.75   17.90
   0   1   4  532.25   17.80
   0   1  -4  515.45   19.50
   0   1   4  514.05   19.80
   0   1  -4  521.35   19.70
   0  -1   4  498.65   19.40
   0  -1   4  520.75   18.70
   0  -1   4  536.55   19.40
   0   1   4  524.05   19.20
   0  -2   4 1673.43   56.69
   0  -2  -4 1665.83   55.39
   0  -2  -4 1644.34   56.89
   0   2  -4 1632.14   58.09
   0   2  -4 1646.64   57.19
   0   2  -4 1607.54   56.89
   0   2   4 1677.43   55.79
   0  -2   4 1630.54   56.89
   0   2   4 1683.83   57.89
   0  -3  -4   86.09    4.30
   0   3   4   88.79    6.10
   0   3  -4   84.79    5.60
   0  -3   4   84.79    5.20
   0   4   4  368.66   16.30
   0   4  -4  368.16   16.00
   0  -4   4  377.36   15.10
   0  -4  -4  368.26   14.30
   0   4  -4  370.26   17.50
   0  -5   4    0.50    2.00
   0   5  -4    3.00    2.70
   0   5   4   -3.00    2.40
   0  -5  -4    0.60    1.90
   0  -6   4  268.67   12.80
   0   6  -4  267.77   14.60
   0  -6   4  290.87   15.70
   0  -6  -4  288.97   13.00
   0   6   4  270.77   14.50
   0   6   4  271.57   14.40
   0   7  -4  151.98   10.80
   0   7   4  131.49   10.10
   0  -7   4  119.29   10.90
   0  -7   4  136.49    8.40
   0  -7  -4  126.79    8.60
   0  -8  -4   33.60    5.30
   0   8   4   37.50    6.90
   0   8  -4   45.30    7.40
   0  -8   4   41.30    7.50
   0   0  -5 1372.46   47.80
   0   0   5 1336.27   49.00
   0   0   5 1408.36   47.50
   0   0  -5 1450.45   48.00
   0   1   5   85.79    5.60
   0  -1   5   80.39    5.30
   0   1  -5   85.19    4.90
   0   1  -5   83.49    5.30
   0  -1   5   86.79    4.90
   0  -1   5   87.49    4.50
   0  -1  -5   78.59    4.60
   0   1   5   84.59    3.40
   0  -1  -5   85.69    3.80
   0   2  -5 1570.64   56.29
   0   2   5 1640.54   53.49
   0  -2  -5 1522.25   54.89
   0   2   5 1608.64   56.29
   0  -2   5 1586.04   55.29
   0   2  -5 1642.24   55.29
   0  -2  -5 1538.75   53.19
   0   3  -5   34.10    4.80
   0  -3  -5   32.00    3.70
   0   3   5   36.50    4.60
   0  -3   5   40.30    3.70
   0   3  -5   40.20    4.20
   0  -3  -5   43.40    2.50
   0  -4  -5  601.04   23.70
   0   4   5  584.24   24.30
   0  -4  -5  594.54   22.80
   0  -4   5  604.74   22.90
   0   4  -5  588.64   25.50
   0  -4  -5  613.34   21.40
   0   4  -5  582.74   23.70
   0  -5  -5  257.17   13.30
   0   5  -5  246.18   13.10
   0  -5   5  260.97   12.00
   0   5   5  249.18   13.50
   0  -5  -5  269.77   11.10
   0  -6  -5  191.48    9.60
   0  -6  -5  198.68   12.00
   0  -6   5  197.88   13.00
   0   6  -5  198.88   12.00
   0  -6   5  197.58   10.30
   0   6   5  187.78   12.10
   0  -7   5    1.70    2.90
   0  -7   5    7.50    4.90
   0   7  -5    9.90    4.20
   0   7   5    0.60    3.50
   0  -7  -5    5.70    3.00
   0  -7  -5   -3.20    3.50
   0  -8  -5   41.50    7.20
   0  -8   5   24.80    6.60
   0   8  -5   40.90    7.40
   0   8   5   48.30    7.40
   0  -8  -5   38.20    6.50
   0   0  -6    8.00    1.90
   0   0  -6    8.00    1.80
   0   0   6    2.70    1.90
   0   0   6    4.50    1.20
   0   1  -6 2004.80   70.39
   0  -1   6 2016.10   71.19
   0   1  -6 2081.09   70.89
   0  -1  -6 2098.89   70.09
   0  -1  -6 2074.19   69.09
   0   1   6 1967.10   71.49
   0   1   6 2069.49   68.49
   0  -2  -6  233.78   10.60
   0  -2   6  235.18   11.20
   0   2  -6  241.98   11.90
   0   2   6  247.28    9.00
   0   2  -6  253.57   11.10
   0  -2  -6  242.98    8.90
   0   2   6  246.08   12.20
   0  -3   6   87.69    5.90
   0   3   6   86.49    6.90
   0  -3  -6   90.39    3.80
   0   3  -6   85.59    7.10
   0  -3  -6   76.69    5.80
   0   3  -6   81.39    5.90
   0   4  -6  224.58   11.40
   0   4  -6  219.08   13.10
   0   4   6  218.28   12.20
   0  -4  -6  214.58    9.80
   0  -4  -6  223.78    8.60
   0  -4   6  215.78   10.70
   0  -4  -6  209.58   11.20
   0  -5  -6  165.78    7.80
   0  -5  -6  183.48   10.80
   0   5  -6  158.98   10.30
   0  -5   6  165.28    9.30
   0   5   6  168.78   11.20
   0  -6   6  139.39    8.60
   0  -6  -6  142.59   10.30
   0  -6  -6  149.09    7.60
   0  -6   6  144.39   11.10
   0   6   6  119.09   10.20
   0   6  -6  141.29   10.30
   0  -7  -6   14.00    5.00
   0  -7   6   14.80    5.80
   0  -7  -6    8.00    3.50
   0   7   6   12.10    4.80
   0   7  -6    8.50    4.40
   0   0  -7   47.00    4.10
   0   0   7   41.50    3.10
   0   0  -7   39.20    3.70
   0   0   7   42.50    5.00
   0  -1  -7  351.96   12.80
   0   1   7  312.37   12.00
   0  -1  -7  334.57   13.70
   0   1  -7  282.67   13.80
   0   1  -7  361.06   14.70
   0   1   7  341.07   15.30
   0  -1   7  371.76   15.30
   0  -2  -7  262.27   11.70
   0   2  -7  268.17   12.10
   0  -2  -7  261.77    9.70
   0  -2   7  262.67   12.50
   0   2   7  263.77    9.60
   0   2   7  250.37   13.00
   0   2  -7  256.57   12.90
   0  -3  -7  214.58    8.10
   0   3   7  210.68   12.10
   0   3  -7  216.58   12.30
   0  -3  -7  235.88   10.90
   0   3  -7  212.98   11.00
   0  -3   7  225.08   11.00
   0  -4   7   46.00    5.10
   0   4  -7   38.70    5.30
   0  -4  -7   46.10    5.30
   0   4  -7   39.60    6.30
   0  -4  -7   40.60    3.70
   0  -4  -7   41.30    2.80
   0   4   7   38.20    5.80
   0  -5  -7   15.50    2.20
   0   5   7   15.30    4.60
   0   5  -7   12.20    4.00
   0  -5  -7   13.20    4.00
   0  -5   7   16.70    3.60
   0  -6  -7   12.00    4.60
   0  -6   7   17.80    5.40
   0   6  -7   19.40    4.90
   0   6   7    7.70    4.50
   0  -6   7    7.40    3.30
   0   7  -7    5.50    4.10
   0   7   7    4.20    4.40
   0  -7   7    4.90    4.80
   0  -7  -7    4.40    4.30
   0   0  -8   62.59    4.70
   0   0   8   56.89    4.10
   0   0  -8   58.59    5.00
   0   0   8   53.69    5.60
   0   1  -8   70.89    5.90
   0  -1   8   76.79    6.50
   0   1   8   87.09    7.10
   0   1   8   72.09    3.60
   0  -1  -8   77.09    4.50
   0  -1  -8   72.99    5.50
   0   1  -8   69.39    5.50
   0   2   8  576.54   20.00
   0  -2   8  566.34   23.50
   0   2   8  557.54   24.30
   0  -2  -8  562.54   22.20
   0   2  -8  598.74   23.20
   0   2  -8  568.54   23.80
   0  -2  -8  588.84   20.30
   0  -3  -8    4.70    1.10
   0  -3   8    2.00    2.70
   0   3  -8    3.50    2.60
   0   3  -8    1.10    3.20
   0  -3  -8    5.90    2.80
   0   3   8    4.90    3.80
   0   4  -8  972.90   37.00
   0   4  -8  949.11   38.90
   0  -4  -8  929.91   32.70
   0  -4  -8  966.20   36.30
   0   4   8  980.20   38.60
   0  -4   8  957.30   36.40
   0  -5  -8   36.70    5.50
   0  -5   8   43.50    5.70
   0   5   8   46.50    7.10
   0   5  -8   57.29    6.80
   0   6  -8   63.39    7.80
   0  -6  -8   71.09    7.80
   0   6   8   66.99    9.00
   0  -6   8   62.89    8.70
   0  -6   8   68.79    7.00
   0   7  -8   -0.90    3.60
   0  -7   8   -5.00    4.20
   0  -7  -8   -3.10    4.00
   0   7   8   -4.40    4.00
   0   0  -9 2288.97   80.89
   0   0   9 2324.97   83.49
   0   0  -9 2429.96   81.69
   0   1   9  108.89    8.50
   0  -1  -9   98.89    6.70
   0  -1   9  100.79    7.60
   0   1  -9  106.59    7.20
   0  -1  -9   99.49    5.60
   0   1  -9   99.59    7.00
   0   1   9   98.29    4.60
   0   2  -9  259.07   13.70
   0  -2   9  307.97   14.80
   0  -2  -9  300.17   11.10
   0   2  -9  298.77   14.80
   0   2   9  294.77   15.70
   0  -2  -9  288.97   13.30
   0  -3  -9   80.39    6.80
   0  -3   9   86.29    7.30
   0   3  -9   87.99    7.40
   0   3   9   80.39    8.80
   0   3  -9   66.59    7.80
   0   4  -9  951.00   39.40
   0   4  -9  918.11   37.40
   0  -4  -9  974.30   36.70
   0  -4   9  981.40   37.50
   0   4   9  984.60   39.60
   0  -5  -9   29.50    5.40
   0  -5   9   37.50    5.60
   0   5  -9   46.80    6.50
   0   5   9   51.59    7.80
   0  -6   9   18.40    4.40
   0   6   9   20.50    6.40
   0  -6   9   15.00    5.50
   0  -6  -9   15.20    4.70
   0   6  -9   12.80    4.70
   0   0 -10   39.90    5.00
   0   0 -10   40.10    4.40
   0   0  10   43.70    6.40
   0   1 -10  193.98   10.90
   0  -1  10  200.38   12.10
   0   1 -10  204.18   11.00
   0  -1 -10  195.38    9.00
   0  -1 -10  191.88   10.30
   0   1  10  202.18   12.30
   0  -2  10   65.19    7.40
   0  -2 -10   61.19    6.30
   0   2 -10   49.20    6.30
   0   2  10   56.29    7.60
   0   2 -10   59.89    6.70
   0  -3 -10   11.30    3.80
   0   3 -10    3.30    3.40
   0   3 -10   -1.00    4.00
   0  -3  10    3.40    3.50
   0   3  10    7.30    4.20
   0  -4 -10  176.68   11.30
   0   4 -10  172.98   11.40
   0  -4  10  164.88   11.00
   0   4  10  172.48   13.10
   0   4 -10  179.18   13.30
   0   5 -10   16.00    4.80
   0  -5  10   18.00    4.60
   0  -5  10   16.10    5.60
   0  -5 -10   26.80    5.50
   0   5  10   13.40    5.70
   0  -6 -10    5.40    4.70
   0   6  10    8.90    6.00
   0  -6  10   17.90    4.60
   0  -6  10   22.30    6.30
   0   6 -10   13.30    5.10
   0   0  11    3.90    3.90
   0   0 -11    4.50    2.50
   0   0 -11    5.60    3.00
   0  -1  11   11.00    4.70
   0   1  11    6.70    4.10
   0   1 -11    4.40    3.10
   0  -1 -11    9.30    3.40
   0   1 -11   14.20    4.00
   0   2 -11    2.70    3.40
   0   2 -11    0.20    2.80
   0  -2  11   -2.40    3.00
   0   2  11   -1.50    4.00
   0  -2 -11    0.10    3.00
   0   3 -11   57.89    8.00
   0   3  11   64.09    8.90
   0   3 -11   66.29    7.90
   0  -3  11   62.59    7.50
   0  -3 -11   79.19    7.50
   0   4  11   -0.20    4.40
   0  -4  11   -1.60    3.30
   0  -4 -11   -2.30    3.60
   0   4 -11    2.70    3.80
   0  -5  11   85.69    8.90
   0  -5 -11   97.99    9.70
   0   5 -11   92.29    9.60
   0   5  11  100.39   12.00
   0  -5  11  110.69   10.80
   0   0  12   98.99    9.50
   0   0 -12  104.59    8.40
   0   1 -12   19.40    4.60
   0   1 -12   18.80    4.50
   0  -1  12   13.20    4.80
   0  -1 -12   10.60    3.80
   0   1  12   14.00    5.20
   0   2 -12  138.69   10.10
   0  -2 -12  125.89    9.50
   0   2  12  146.99   12.20
   0   2 -12  139.29   10.50
   0  -2  12  139.79   11.10
   0   3  12   38.00    7.70
   0  -3 -12   33.10    5.60
   0  -3  12   30.70    5.80
   0   3 -12   31.90    5.90
   0   4  12   11.40    5.60
   0  -4  12   10.60    4.50
   0  -4  12    8.20    4.90
   0  -4 -12    9.30    4.50
   0   4 -12    3.70    3.90
   0   0 -13  100.79    8.70
   0   0  13  120.49   11.30
   0  -1  13   58.09    8.50
   0  -1 -13   44.10    6.10
   0   1 -13   45.30    6.40
   0   1  13   46.60    8.00
   0  -2  13   83.79    9.90
   0   2  13   98.19   11.40
   0  -2 -13   88.19    8.50
   0   2 -13   90.49    8.70
   0  -3  13    2.60    4.20
   0   3 -13   -0.10    3.60
   0  -3 -13   -2.80    3.50
   0  -3  13    2.00    4.10
   0   3  13   -2.40    4.60
   0   0 -14   98.49    9.20
   0   0  14  104.09   11.30
   0   1 -14   26.30    5.60
   0  -1 -14   23.70    5.20
   0   1  14   29.80    7.00
   0  -1  14   22.50    6.30
  -1   0   0   -0.30    0.10
   1   0   0   -0.70    0.10
   1   0   0   -0.60    0.10
  -1   1   0 1552.64   52.69
  -1  -1   0 1573.84   52.29
  -1   1   0 1570.04   52.89
  -1  -1   0 1569.14   52.79
  -1   1   0 1552.24   52.89
   1   1   0 1521.55   52.89
   1  -1   0 1592.54   52.89
   1   1   0 1577.74   52.39
   1   1   0 1548.45   52.79
   1  -1   0 1555.74   52.69
   1  -1   0 1577.24   52.89
   1   2   0   24.50    2.20
   1  -2   0   27.30    2.60
  -1  -2   0   22.80    2.50
   1   2   0   22.20    2.70
  -1   2   0   21.90    2.60
   1  -2   0   28.80    2.90
  -1  -2   0   27.70    2.90
  -1   2   0   22.00    2.60
   1  -2   0   25.20    2.50
  -1  -2   0   27.10    2.90
  -1   2   0   23.80    2.60
  -1  -2   0   26.60    2.10
  -1   3   0  136.19    7.30
  -1   3   0  131.99    7.00
   1   3   0  128.19    6.10
   1  -3   0  135.49    6.60
  -1   3   0  130.89    6.60
  -1  -3   0  127.69    6.80
  -1  -3   0  132.69    6.10
   1   3   0  130.49    7.10
   1  -3   0  147.19    8.10
   1   4   0 1661.53   59.49
  -1   4   0 1764.72   60.79
  -1  -4   0 1746.03   60.59
  -1   4   0 1663.23   59.99
  -1  -4   0 1754.42   59.59
   1   4   0 1740.73   61.09
   1  -4   0 1761.62   60.69
   1  -5   0   17.50    3.50
   1   5   0   12.10    3.40
  -1  -5   0   11.20    3.10
  -1   5   0   15.40    3.50
  -1   6   0   21.10    4.30
  -1  -6   0   12.80    3.10
   1  -6   0   13.40    3.70
   1  -6   0   11.90    3.30
   1   6   0   11.40    3.80
  -1  -6   0    8.60    3.50
  -1   7   0   60.69    7.40
  -1  -7   0   41.00    6.30
   1   7   0   58.39    7.40
  -1  -7   0   69.79    6.20
   1  -7   0   66.89    7.60
   1  -7   0   71.49    6.80
   1  -8   0    2.50    4.00
   1   8   0    0.40    4.00
  -1   8   0    7.20    4.30
  -1  -8   0    1.00    4.00
   1   0   1 4198.98  142.09
  -1   0  -1 4296.57  142.09
   1   0  -1 4283.27  142.19
  -1   0   1 4197.08  141.39
  -1   0  -1 4327.17  141.69
  -1   0   1 4241.88  143.09
   1   0   1 4128.79  141.49
   1   1  -1 2397.76   82.09
  -1   1   1 2385.86   82.19
   1   1  -1 2461.85   81.69
  -1  -1  -1 2518.25   81.89
   1  -1   1 2460.95   81.79
  -1   1   1 2435.56   81.79
  -1  -1  -1 2417.96   81.69
  -1  -1   1 2421.36   82.09
  -1  -1   1 2490.85   82.39
  -1  -1   1 2441.96   81.59
   1  -1  -1 2431.86   82.19
   1   1   1 2502.55   81.99
  -1   1  -1 2390.76   81.79
   1  -1  -1 2449.75   81.79
  -1   1  -1 2480.55   82.19
   1   1   1 2370.26   82.19
   1   1   1 2498.05   81.79
   1  -1  -1 2408.06   82.09
  -1  -2  -1  773.02   26.70
   1  -2   1  842.42   27.10
  -1   2   1  802.82   27.20
   1   2  -1  792.72   27.30
  -1   2   1  780.62   27.10
   1  -2   1  803.92   27.00
   1  -2   1  825.42   27.00
  -1  -2  -1  803.12   26.60
   1  -2   1  819.22   27.60
  -1  -2  -1  744.63   27.40
  -1  -2   1  757.22   26.30
   1   2   1  738.13   26.80
  -1  -2   1  722.43   27.10
   1  -2  -1  739.23   27.00
  -1  -2   1  731.63   26.30
  -1   2  -1  713.23   26.80
   1  -2  -1  745.53   26.90
   1  -2  -1  751.02   27.20
  -1  -2   1  730.43   27.10
  -1   2  -1  725.33   27.50
   1   2   1  719.33   26.60
   1   2   1  715.43   27.20
  -1   3   1  692.73   25.20
  -1   3   1  678.23   25.00
   1  -3   1  710.63   24.90
   1  -3   1  707.03   25.20
   1   3  -1  690.03   25.50
   1  -3   1  654.53   24.70
  -1  -3  -1  738.23   25.80
  -1  -3  -1  702.53   24.50
  -1  -3  -1  690.53   24.80
  -1   3  -1  678.93   25.90
   1  -3  -1  667.93   25.20
  -1   3  -1  669.83   25.10
   1  -3  -1  676.93   24.80
  -1  -3   1  634.24   24.10
   1   3   1  674.73   24.60
  -1  -3   1  655.53   25.30
  -1  -3   1  677.63   24.30
   1   3   1  662.93   25.40
   1  -3  -1  677.53   24.90
  -1   4   1  564.84   22.20
   1   4  -1  574.74   22.60
  -1  -4  -1  564.54   21.70
  -1   4   1  544.45   21.70
  -1  -4  -1  582.54   21.20
   1  -4   1  606.04   23.10
   1  -4   1  556.44   21.50
   1   4   1  561.24   22.40
   1   4   1  555.14   21.30
   1  -4  -1  553.04   21.70
  -1  -4   1  562.54   21.00
  -1   4  -1  560.64   22.10
  -1  -4   1  553.54   22.20
  -1  -4   1  568.24   21.00
  -1   4  -1  556.24   22.90
  -1   5   1   33.70    4.60
  -1  -5  -1   26.80    3.90
   1   5  -1   37.80    5.00
  -1   5   1   35.20    4.40
   1  -5   1   33.90    4.80
   1  -5   1   38.70    4.20
   1   5   1   27.30    3.70
  -1   5  -1   27.80    4.30
  -1  -5   1   33.00    3.60
   1  -5  -1   29.20    4.20
  -1  -5   1   26.30    4.30
   1   5   1   28.30    4.60
  -1  -6  -1   67.39    6.50
   1  -6   1   70.49    6.20
   1  -6   1   68.19    7.00
  -1   6   1   61.09    6.80
   1   6  -1   68.39    7.30
  -1   6   1   66.69    6.30
  -1  -6   1   91.99    6.20
   1  -6  -1   72.79    6.60
  -1  -6   1   74.09    7.10
  -1   6  -1   84.79    7.30
   1   6   1   75.99    7.50
   1   6   1   70.09    6.00
   1   7  -1   53.99    7.40
   1  -7   1   32.90    6.10
  -1  -7  -1   47.10    5.70
   1  -7   1   48.50    5.80
  -1   7   1   39.80    6.30
  -1  -7  -1   38.00    5.90
  -1  -7   1   49.60    5.30
   1   7   1   36.60    6.10
  -1   7  -1   31.40    5.80
   1  -7  -1   52.99    6.40
  -1  -7   1   27.10    5.60
   1  -7  -1   36.90    5.70
   1  -8   1   68.29    8.70
  -1   8   1   83.99    9.40
  -1  -8  -1   84.89    8.90
   1   8  -1  105.59   10.50
  -1  -8   1   96.59    9.70
  -1   8  -1  101.79    9.90
   1  -8  -1  106.69    8.90
   1  -8  -1  103.09    9.40
   1   8   1   99.89   10.40
  -1   0  -2 5521.45  186.28
  -1   0   2 5439.46  186.48
   1   0  -2 5612.74  185.78
   1   0  -2 5277.27  186.48
  -1   0   2 5494.05  186.78
   1   0  -2 5555.74  185.78
  -1   0  -2 5536.25  186.78
  -1   0   2 5728.43  185.68
   1   0   2 5747.92  187.48
   1   0   2 5739.83  188.98
   1   0   2 5607.94  186.98
   1  -1   2 2189.08   72.99
  -1  -1  -2 2122.09   71.79
   1   1  -2 2183.18   73.09
  -1  -1  -2 2130.09   72.79
   1   1  -2 2079.59   72.59
  -1  -1  -2 2148.89   72.79
  -1   1   2 2173.78   72.99
   1  -1   2 2074.79   72.19
   1  -1   2 2156.38   72.69
   1   1  -2 2170.78   72.39
   1   1   2 2187.08   71.99
  -1   1  -2 2126.09   72.99
  -1  -1   2 2178.28   72.49
  -1   1  -2 2195.38   72.79
  -1  -1   2 2228.08   72.99
  -1   1  -2 2103.39   72.29
   1  -1  -2 2145.99   71.69
   1   1   2 2179.78   72.79
  -1  -1   2 2154.98   72.39
   1  -1  -2 2160.18   72.49
   1  -1  -2 2093.29   72.89
   1   2  -2 4663.43  154.58
  -1   2   2 4650.53  154.08
   1   2  -2 4537.55  153.88
   1   2  -2 4726.63  153.28
  -1  -2  -2 4691.93  153.08
  -1   2   2 4471.55  153.68
  -1  -2  -2 4682.03  153.58
   1  -2   2 4705.53  153.48
   1  -2   2 4770.02  153.68
   1  -2  -2 4515.65  153.88
  -1   2  -2 4465.45  153.48
  -1   2  -2 4538.35  154.48
   1  -2  -2 4472.55  153.98
  -1  -2   2 4480.95  153.68
   1   2   2 4489.85  153.68
   1   2   2 4499.05  153.98
   1  -2  -2 4609.34  153.28
   1   2   2 4654.13  153.28
   1  -2  -2 4446.96  152.88
  -1  -2   2 4584.44  153.08
  -1   2  -2 4591.44  153.78
  -1   3   2   46.10    4.10
  -1  -3  -2   45.40    3.50
   1  -3   2   45.70    3.60
  -1  -3  -2   44.50    3.50
  -1   3   2   42.00    4.00
   1  -3   2   42.20    3.70
   1   3  -2   40.70    4.10
   1   3   2   51.59    3.90
   1   3   2   46.20    4.30
  -1  -3   2   54.59    3.40
  -1   3  -2   43.20    4.00
   1  -3  -2   45.10    3.40
   1  -3  -2   43.60    3.60
   1  -3  -2   51.29    4.50
   1  -4   2  732.03   28.50
  -1   4   2  754.52   29.30
  -1   4   2  778.22   29.50
   1   4  -2  768.02   29.70
  -1  -4  -2  766.62   28.60
  -1  -4   2  804.02   28.40
   1   4   2  795.82   29.70
  -1  -4   2  823.62   30.00
   1   4   2  775.62   29.00
   1  -4  -2  786.72   28.60
  -1   4  -2  775.32   30.60
  -1   4  -2  774.42   29.40
  -1  -4   2  813.72   28.20
   1  -5   2  325.17   14.70
  -1   5   2  343.57   15.90
  -1  -5  -2  366.76   15.20
   1   5  -2  356.36   16.30
  -1   5   2  348.47   15.70
   1  -5  -2  339.67   14.90
   1   5   2  349.27   16.10
  -1  -5   2  350.56   16.10
   1   5   2  350.16   15.20
  -1  -5   2  358.76   14.40
  -1   5  -2  352.86   15.80
   1  -6   2  302.17   15.50
  -1  -6  -2  295.57   14.20
  -1   6   2  300.27   14.80
  -1   6   2  286.67   14.90
   1   6  -2  290.47   15.20
   1  -6   2  310.37   14.00
  -1  -6   2  303.47   15.50
   1   6   2  306.47   15.50
   1  -6  -2  295.27   14.20
  -1  -6   2  306.17   13.40
   1   6   2  301.87   14.30
  -1   6  -2  299.77   15.00
  -1  -7  -2   -2.30    2.90
   1  -7   2   -1.00    3.60
  -1   7   2   -0.20    3.40
  -1   7   2    0.30    3.00
   1   7  -2   -0.60    3.40
   1  -7   2   -0.70    2.50
   1   7   2   -0.80    2.70
   1  -7  -2   -1.00    2.80
  -1  -7   2    1.50    2.40
  -1   7  -2    0.40    3.40
  -1  -7   2   -3.10    3.40
   1   7   2   -1.40    3.10
  -1   8   2   70.99    8.60
  -1  -8  -2   48.00    6.60
   1  -8   2   65.09    8.50
   1   8  -2   54.89    8.10
  -1   8  -2   72.99    8.60
   1   8   2   72.99    8.80
  -1  -8   2   58.29    8.00
   1  -8  -2   61.19    7.30
   1   0  -3 1427.56   49.50
  -1   0   3 1521.75   49.50
   1   0   3 1463.65   49.30
   1   0   3 1444.06   50.09
  -1   0   3 1493.45   49.20
  -1   0  -3 1495.55   49.30
   1   0   3 1419.66   49.30
  -1   0   3 1447.76   50.09
   1   0  -3 1432.46   50.09
   1   0  -3 1460.15   49.30
  -1   0  -3 1450.25   49.40
   1   1  -3  173.48    7.40
  -1  -1  -3  171.78    5.90
   1   1  -3  180.98    7.00
   1  -1   3  175.48    6.50
  -1  -1  -3  160.28    6.70
  -1  -1  -3  175.98    7.10
  -1  -1  -3  178.88    7.40
  -1   1   3  177.38    7.50
   1  -1   3  184.48    7.30
   1   1  -3  186.58    7.10
   1  -1   3  172.78    7.10
  -1  -1   3  146.39    6.80
  -1  -1   3  146.49    7.00
   1   1   3  141.19    7.20
   1   1   3  143.89    5.80
  -1   1  -3  146.19    6.50
  -1   1  -3  141.19    6.90
  -1   1  -3  137.19    7.10
  -1  -1   3  138.79    6.50
   1  -1  -3  144.99    6.60
   1  -2   3 1970.70   66.79
   1   2  -3 1929.11   67.79
  -1   2   3 1952.80   67.39
   1   2  -3 1925.21   66.89
   1  -2   3 1948.41   66.39
  -1  -2  -3 1943.71   65.69
  -1  -2  -3 1953.30   66.99
   1   2  -3 1955.00   66.59
  -1   2  -3 1934.01   67.79
   1  -2  -3 1937.31   66.69
  -1  -2   3 1992.50   66.39
  -1  -2   3 1962.20   66.79
  -1   2  -3 1891.41   66.49
  -1   2  -3 1937.31   66.99
   1  -2  -3 1986.00   65.99
   1   2   3 1952.30   67.09
   1  -2  -3 1944.71   65.59
   1  -2  -3 2040.20   67.29
   1   2   3 1996.30   65.99
   1   3  -3  133.89    8.20
   1   3  -3  125.89    7.10
   1  -3   3  149.69    7.00
  -1   3   3  136.99    7.50
   1  -3   3  142.99    7.70
   1   3  -3  155.48    6.80
  -1  -3  -3  139.89    6.20
  -1   3  -3  122.19    6.90
   1  -3  -3  127.59    6.10
   1   3   3  128.59    7.10
  -1   3  -3  143.59    7.20
   1   3   3  128.79    6.50
  -1  -3   3  134.89    6.40
   1  -3  -3  136.19    6.60
   1   3   3  122.99    7.20
  -1   3  -3  127.29    8.10
  -1   4   3  414.56   17.60
  -1   4   3  399.96   17.30
   1   4  -3  396.16   17.40
  -1  -4  -3  407.36   16.10
   1  -4   3  415.76   16.70
   1  -4  -3  424.66   16.20
  -1  -4   3  423.96   16.50
   1   4   3  416.76   17.60
  -1   4  -3  429.06   18.80
   1   4   3  408.26   17.20
  -1  -4   3  436.76   16.20
  -1   4  -3  424.16   17.30
  -1  -4   3  403.26   17.80
  -1   5   3  108.69    7.60
   1  -5   3  108.99    6.60
  -1   5   3   99.79    7.50
   1   5  -3  116.69    7.90
  -1  -5  -3  100.09    6.50
   1   5   3   85.99    7.30
  -1   5  -3   82.49    7.00
  -1  -5   3   89.59    7.70
   1  -5  -3   99.99    6.40
  -1  -5   3   93.09    5.90
   1   5   3  103.49    7.00
  -1  -6  -3  197.48   10.30
   1   6  -3  190.58   11.80
  -1   6   3  197.28   11.50
   1  -6   3  192.98   10.30
   1  -6   3  196.88   12.00
  -1   6   3  188.98   11.50
   1  -6  -3  198.58   10.50
  -1  -6   3  187.38   12.00
  -1  -6   3  197.58    9.80
   1   6   3  193.28   11.80
   1   6   3  209.78   11.30
  -1   6  -3  196.98   11.60
   1  -7   3   50.29    5.70
  -1   7   3   42.30    6.30
   1  -7   3   32.90    6.60
  -1   7   3   42.50    6.40
  -1  -7  -3   37.00    5.30
   1   7  -3   36.30    6.20
  -1   7  -3   47.40    6.70
  -1  -7   3   37.60    6.30
   1   7   3   47.70    6.10
   1  -7  -3   45.30    5.70
  -1  -7   3   47.30    5.00
   1   7   3   50.39    7.10
   1   8  -3   60.59    8.30
  -1   8   3   44.30    6.90
  -1   8   3   41.60    6.60
   1  -8   3   49.90    8.00
  -1  -8  -3   49.50    6.40
  -1  -8   3   44.60    7.40
   1  -8  -3   47.60    6.30
   1   8   3   56.29    8.30
  -1   8  -3   58.09    7.90
  -1   0  -4 3427.96  111.69
  -1   0   4 3372.26  111.79
   1   0   4 3221.78  112.69
   1   0  -4 3293.17  111.89
  -1   0   4 3343.17  111.39
  -1   0   4 3283.37  112.69
   1   0  -4 3407.66  112.69
  -1   0  -4 3371.26  111.79
   1   0  -4 3257.47  111.59
   1   0   4 3354.86  111.49
   1   0   4 3259.87  111.59
   1   1  -4  596.04   19.60
   1  -1   4  574.64   19.90
   1  -1   4  581.94   18.80
  -1   1   4  569.84   20.30
  -1  -1  -4  568.44   20.90
  -1  -1  -4  558.04   18.20
   1   1  -4  553.54   19.90
   1  -1   4  572.14   19.70
  -1   1   4  594.44   20.80
  -1   1   4  582.04   17.80
  -1  -1  -4  560.34   19.10
   1   1  -4  561.54   19.70
   1  -1  -4  480.35   19.00
   1   1   4  475.35   19.20
  -1  -1   4  475.15   19.40
  -1   1  -4  476.85   19.60
   1  -1  -4  472.65   17.90
   1   1   4  472.15   19.80
  -1   1  -4  500.45   19.00
  -1  -1   4  473.15   18.80
   1   1   4  487.15   18.00
  -1   1  -4  467.45   19.60
  -1  -1   4  465.75   19.40
  -1   2   4  379.56   15.40
   1   2  -4  363.26   14.60
  -1  -2  -4  380.06   14.60
   1  -2   4  375.86   14.10
   1  -2   4  381.26   14.70
  -1  -2  -4  384.66   13.10
   1   2  -4  374.16   15.60
   1   2  -4  402.66   14.70
   1  -2  -4  362.56   12.80
   1  -2  -4  357.56   14.40
   1   2   4  349.96   15.00
  -1   2  -4  364.86   14.30
  -1   2  -4  359.16   14.80
  -1  -2   4  368.26   14.40
  -1  -2   4  369.56   15.00
  -1   2  -4  360.46   15.60
   1   2   4  383.56   13.50
  -1  -3  -4 1609.54   57.39
  -1  -3  -4 1610.84   55.79
   1  -3   4 1649.13   57.19
  -1   3   4 1629.94   58.19
   1   3  -4 1588.44   57.59
   1   3  -4 1633.14   58.89
   1   3  -4 1635.84   57.09
  -1   3  -4 1622.94   57.29
  -1   3  -4 1620.34   58.89
   1  -3  -4 1659.53   57.39
   1  -3  -4 1684.13   56.49
   1   3   4 1667.63   57.99
  -1  -3   4 1671.23   56.79
   1  -3  -4 1664.73   55.69
   1   3   4 1724.13   56.59
  -1   4   4    4.50    2.70
   1   4  -4    6.50    2.70
   1  -4   4    9.70    2.30
  -1  -4  -4    6.00    1.90
   1  -4  -4    8.40    1.90
  -1   4  -4   11.70    3.80
   1  -4  -4   11.70    2.90
   1   4   4    9.60    2.90
  -1  -4   4    9.80    2.10
  -1   4  -4    8.00    2.70
   1   4   4    8.30    2.70
   1  -4  -4    5.30    2.60
   1   5  -4  181.28   10.70
  -1   5   4  181.48   10.70
   1  -5   4  181.48    9.50
  -1  -5  -4  171.28    8.80
   1   5   4  191.28   10.70
  -1   5  -4  182.88   11.80
   1  -5  -4  189.08    8.90
  -1   5  -4  175.08   10.20
  -1  -5   4  173.18    8.80
   1  -5  -4  185.38   10.40
   1   5   4  169.28   10.10
  -1  -5   4  198.78   11.60
  -1  -6  -4  140.29    8.20
   1  -6   4  131.79   10.50
  -1   6   4  138.99    9.90
   1   6  -4  137.09    9.90
   1  -6   4  147.89    8.60
   1   6   4  135.79    9.80
  -1  -6   4  135.69   10.50
   1  -6  -4  128.49    8.00
  -1  -6   4  137.79    7.80
   1   6   4  121.09    9.00
  -1   6  -4  132.79    9.50
   1  -7   4   94.39    7.50
   1  -7   4   96.89    9.40
  -1   7   4  100.59    9.00
  -1  -7  -4   99.19    7.60
   1   7  -4   87.09    9.00
   1   7   4  105.59    8.80
  -1  -7   4  106.39    9.80
   1  -7  -4   98.99    7.70
   1  -7  -4  105.29    9.30
   1   7   4  109.79    9.50
  -1   7  -4  104.89    9.20
  -1  -7   4  106.09   10.20
  -1  -8  -4    1.50    3.30
   1   8  -4    0.30    4.00
  -1   8   4    1.80    4.00
   1  -8   4   -0.60    4.10
   1  -8  -4    1.90    4.20
  -1  -8   4   -0.40    4.00
  -1   8  -4   -1.00    3.80
   1  -8  -4    3.30    3.20
  -1   0  -5 2679.53   90.99
   1   0  -5 2644.14   90.79
  -1   0  -5 2713.33   90.89
  -1   0   5 2724.53   90.49
   1   0   5 2687.23   90.49
  -1   0   5 2647.04   92.09
   1   0  -5 2704.53   91.09
   1   0   5 2763.72   90.99
   1   0   5 2653.03   92.09
  -1  -1  -5  241.98   10.40
  -1   1   5  258.57    9.20
   1  -1   5  247.48   11.30
   1  -1   5  263.17   10.20
  -1   1   5  242.58   11.70
  -1  -1  -5  255.47    9.80
   1   1  -5  261.37   11.10
   1   1  -5  248.08   11.20
   1  -1   5  247.58   10.80
  -1   1  -5  265.07   11.40
   1  -1  -5  266.47   10.70
  -1  -1   5  270.77   11.00
  -1  -1   5  271.87   11.50
   1   1   5  285.87    9.50
   1  -1  -5  277.47    9.60
   1   1   5  272.27   11.90
  -1   1  -5  293.37   11.00
  -1  -2  -5  744.83   26.00
  -1   2   5  764.72   25.90
   1  -2   5  748.13   28.00
  -1  -2  -5  745.13   27.60
  -1   2   5  760.62   28.90
   1   2  -5  764.72   28.00
   1   2  -5  711.43   28.70
   1  -2   5  795.52   27.80
   1  -2  -5  754.22   27.60
  -1  -2   5  765.02   27.90
  -1   2  -5  763.62   27.70
  -1   2  -5  768.42   29.00
   1   2   5  810.62   26.40
   1   2   5  770.62   28.80
   1  -2  -5  752.72   25.70
  -1  -3  -5  390.76   15.80
   1   3  -5  386.66   17.10
   1  -3   5  392.96   15.50
  -1  -3  -5  390.26   13.60
   1   3  -5  380.16   15.80
  -1   3   5  391.26   16.70
   1   3   5  384.76   14.40
   1  -3  -5  387.36   13.40
   1   3   5  363.66   16.30
   1  -3  -5  360.66   15.40
  -1   3  -5  343.57   16.70
  -1   3  -5  373.66   15.50
  -1  -3   5  377.96   15.20
   1  -3  -5  361.46   14.10
   1  -4   5   31.20    3.80
  -1  -4  -5   28.30    4.20
   1   4  -5   24.10    3.90
  -1  -4  -5   26.50    2.60
  -1   4   5   24.90    4.30
   1  -4  -5   18.80    3.80
  -1   4  -5   25.50    5.10
   1   4   5   17.80    3.70
  -1   4  -5   15.70    3.30
   1  -4  -5   19.40    2.80
  -1  -4   5   20.60    3.00
   1  -4  -5   19.10    2.30
   1   5  -5    7.50    3.40
  -1   5   5   13.10    4.10
  -1  -5  -5    6.00    2.40
  -1  -5  -5    7.50    3.50
   1  -5   5   10.00    3.00
  -1   5  -5   14.20    5.00
   1  -5  -5   16.50    2.70
  -1  -5   5    9.10    4.10
   1   5   5   16.10    4.10
   1  -5  -5   11.50    3.80
  -1  -5   5   11.50    2.70
  -1   5  -5   18.00    3.90
   1  -6   5   18.90    3.80
  -1   6   5   22.20    5.20
  -1  -6  -5   16.50    4.50
   1   6  -5   18.70    4.70
   1  -6   5   14.90    4.90
  -1  -6  -5   23.40    3.60
  -1   6  -5   22.20    4.80
   1  -6  -5   12.50    4.40
  -1  -6   5   27.70    3.90
  -1  -6   5   22.50    5.50
   1   6   5   24.80    5.10
   1  -6  -5   19.70    3.40
  -1  -7  -5  107.59    7.40
   1  -7   5  106.79   10.50
   1   7  -5  103.79    9.70
  -1  -7  -5  107.69    9.70
   1  -7   5  101.59    7.70
  -1   7   5   93.79    9.50
  -1  -7   5   92.89   10.20
  -1   7  -5   98.59    9.30
   1  -7  -5  101.19    9.50
   1   7   5   95.49    9.00
   1  -7  -5  103.19    7.40
  -1  -8  -5   15.30    5.70
  -1  -8  -5   31.50    5.00
   1   8  -5   32.80    6.70
   1  -8   5   32.20    7.50
  -1   8   5   31.40    6.40
   1  -8  -5   22.10    6.20
  -1  -8   5   28.10    6.90
  -1   8  -5   34.00    6.60
  -1   0   6  153.98    8.50
  -1   0  -6  163.88    7.30
   1   0  -6  159.98    7.60
   1   0  -6  144.89    7.00
  -1   0  -6  161.28    7.40
  -1   0   6  157.68    6.70
   1   0   6  149.99    6.70
   1   0   6  165.28    8.70
  -1   1   6  158.08    5.50
   1   1  -6  150.18    7.80
  -1  -1  -6  153.18    6.40
  -1   1   6  154.28    8.40
   1   1  -6  161.58    7.80
   1  -1   6  148.89    8.20
  -1  -1  -6  146.89    7.00
  -1   1  -6  155.98    8.00
   1  -1  -6  140.49    6.00
  -1   1  -6  137.69    7.20
   1  -1  -6  141.89    7.10
   1   1   6  137.49    8.20
   1   1   6  138.79    5.80
  -1  -1   6  131.79    7.70
   1  -2   6  982.20   35.80
  -1  -2  -6  949.31   33.30
  -1   2   6  998.90   36.80
  -1  -2  -6  988.60   35.10
   1   2  -6  956.00   36.40
   1   2  -6  971.00   35.60
  -1  -2   6  971.30   35.70
  -1   2  -6 1021.50   35.40
   1   2   6  998.10   33.50
  -1   2  -6  999.10   36.60
   1   2   6  923.11   36.40
   1  -2  -6  982.30   35.00
   1   3  -6   17.10    3.90
  -1  -3  -6   17.70    1.80
   1  -3   6   13.90    2.80
  -1   3   6   18.90    4.00
  -1  -3  -6   16.50    3.20
   1   3  -6   15.10    3.10
  -1   3  -6   15.30    2.90
   1  -3  -6   14.10    1.80
   1   3   6   16.70    2.10
   1   3   6   20.30    3.80
  -1   3  -6   18.20    4.10
   1  -3  -6   13.40    1.40
  -1  -3   6   14.60    2.80
   1  -3  -6   10.80    2.70
   1   4  -6  803.62   33.00
  -1  -4  -6  847.82   31.10
  -1  -4  -6  813.22   29.90
  -1   4   6  797.62   32.10
  -1  -4  -6  821.82   28.20
   1   4  -6  776.62   31.10
   1  -4   6  835.82   30.60
   1  -4  -6  824.32   28.00
  -1  -4   6  811.42   30.20
  -1   4  -6  776.42   30.80
   1   4   6  806.72   32.00
   1  -4  -6  794.82   30.70
   1  -4  -6  796.52   29.00
  -1   4  -6  801.22   33.10
   1   5  -6  753.22   30.70
  -1   5   6  739.63   31.50
  -1  -5  -6  780.52   27.50
  -1  -5  -6  781.92   30.50
   1  -5   6  741.53   29.40
   1  -5  -6  786.92   30.30
  -1   5  -6  757.72   30.40
   1   5   6  763.92   31.20
  -1   5  -6  769.52   32.90
  -1  -5   6  782.22   31.90
  -1  -5   6  767.12   29.00
   1  -5  -6  771.92   27.30
   1   6  -6  100.89    8.90
  -1   6   6  116.99    9.70
  -1  -6  -6   95.29    6.20
   1  -6   6   97.29    7.50
  -1  -6  -6  100.59    9.10
   1  -6   6  102.79   10.70
  -1   6  -6  101.39    8.80
   1  -6  -6   98.29    6.10
   1  -6  -6  102.29    8.90
  -1  -6   6   99.49    9.80
  -1  -6   6   88.79    6.80
   1   6   6  112.89    9.20
   1   7  -6    0.10    3.60
  -1  -7  -6   -1.30    4.10
   1  -7   6   -0.50    4.30
  -1   7   6    4.00    4.30
   1  -7   6   -1.70    2.50
  -1  -7  -6   -1.10    2.40
  -1  -7   6    0.70    4.30
   1  -7  -6   -1.90    3.90
  -1   7  -6    2.50    3.80
   1   7   6   -3.10    3.60
   1   0   7 1257.97   43.00
  -1   0  -7 1279.77   43.70
   1   0  -7 1215.28   43.50
   1   0  -7 1285.07   44.10
  -1   0   7 1235.38   45.40
  -1   0   7 1248.18   42.80
   1   0   7 1162.58   45.10
  -1   0  -7 1248.58   43.80
  -1  -1  -7  783.62   27.00
  -1   1   7  675.63   25.80
   1   1  -7  781.22   28.60
  -1   1   7  778.22   29.70
   1   1  -7  637.84   28.00
  -1  -1  -7  771.62   27.70
   1  -1   7  772.62   29.30
   1   1   7  790.52   29.70
   1  -1  -7  796.82   27.90
   1   1   7  709.93   26.10
   1  -1  -7  795.82   26.60
  -1  -1   7  788.22   29.30
  -1   1  -7  802.52   28.80
  -1  -2  -7 1009.90   37.80
  -1   2   7 1054.79   40.00
   1  -2   7 1021.20   38.90
   1   2  -7 1020.60   39.30
  -1  -2  -7 1058.09   36.30
   1   2  -7 1086.59   38.80
   1   2   7 1038.80   39.80
  -1  -2   7 1073.49   39.00
   1  -2  -7 1044.50   37.90
  -1   2  -7 1099.69   39.70
  -1   2  -7 1127.49   38.60
   1   2   7 1054.59   36.20
  -1  -3  -7    9.70    3.10
   1   3  -7    9.40    3.50
   1  -3   7   11.90    3.10
   1   3  -7   12.40    3.30
  -1   3   7   11.90    3.60
  -1  -3  -7   11.70    1.50
   1  -3  -7   13.60    3.20
  -1   3  -7   15.30    3.20
  -1   3  -7   18.50    4.10
   1   3   7   17.90    2.10
   1   3   7   16.60    4.00
  -1  -3   7   13.10    3.10
   1   4  -7  520.35   21.70
   1   4  -7  515.35   23.30
  -1  -4  -7  515.55   21.10
  -1  -4  -7  541.55   19.60
  -1  -4  -7  533.85   18.00
   1  -4   7  533.95   21.00
  -1   4   7  525.15   22.90
  -1  -4   7  474.95   20.40
   1  -4  -7  474.55   18.50
   1   4   7  495.65   22.40
   1  -4  -7  480.25   20.70
   1  -4  -7  479.05   17.50
  -1   4  -7  483.25   21.00
  -1   4  -7  482.05   23.00
   1   5  -7    9.10    3.80
  -1  -5  -7    7.70    2.00
  -1  -5  -7   13.80    4.50
   1  -5   7   14.10    3.60
  -1   5   7   10.20    4.70
  -1  -5   7    9.70    3.20
   1  -5  -7   19.50    2.10
  -1   5  -7    9.10    4.90
  -1   5  -7   11.30    3.90
  -1  -5   7   20.10    5.20
   1  -5  -7   11.90    4.00
   1   5   7    9.00    4.30
   1   6  -7   88.19    8.90
   1  -6   7  102.49    7.90
  -1   6   7  105.79    9.80
  -1  -6  -7  101.09    6.10
   1  -6   7  107.79   10.50
  -1  -6  -7   96.99    9.20
   1  -6  -7  124.69    9.80
  -1   6  -7  107.79    9.20
  -1  -6   7  105.09   10.30
   1   6   7  108.39    9.70
  -1  -6   7  103.19    7.60
   1   7  -7    9.90    4.60
  -1   7   7    8.00    4.70
  -1  -7  -7   11.50    4.90
   1  -7   7   11.20    5.50
   1   7   7    9.50    4.80
  -1  -7   7   14.70    5.70
  -1   7  -7   12.40    4.50
   1  -7  -7    8.50    4.90
   1   0  -8  355.96   14.80
  -1   0  -8  334.77   14.30
   1   0  -8  332.47   14.10
  -1   0   8  351.06   13.30
  -1   0  -8  384.26   14.70
   1   0   8  329.47   15.90
  -1   0   8  330.17   15.80
   1  -1   8  450.45   19.30
   1   1  -8  444.86   18.40
  -1   1   8  427.66   15.70
  -1   1   8  435.36   19.60
  -1  -1  -8  444.06   17.60
  -1  -1  -8  451.75   17.00
   1   1  -8  411.56   18.30
   1  -1  -8  463.95   18.00
  -1   1  -8  475.35   18.90
  -1  -1   8  450.35   19.30
   1  -1  -8  461.45   16.60
   1   1   8  464.85   20.00
   1   1   8  438.16   16.10
  -1   1  -8  447.36   18.20
   1  -2   8  210.18   11.20
  -1   2   8  205.18   11.80
  -1  -2  -8  206.38   10.00
  -1  -2  -8  212.88    8.40
   1   2  -8  211.38   10.90
   1   2  -8  190.78   11.10
  -1  -2   8  201.78   10.90
   1  -2  -8  191.98   10.00
   1   2   8  199.28    8.00
   1   2   8  191.88   11.40
  -1   2  -8  204.28   11.50
  -1   2  -8  210.88   10.60
  -1  -3  -8  309.07   14.10
   1   3  -8  312.77   16.00
  -1   3   8  294.87   15.80
   1   3  -8  311.77   14.90
   1  -3   8  298.17   14.70
  -1  -3  -8  299.97   11.60
  -1   3  -8  322.27   16.30
  -1   3  -8  316.27   14.60
   1  -3  -8  330.67   14.30
   1   3   8  300.27   15.70
   1   3   8  329.57   12.20
  -1  -3   8  325.07   14.80
  -1  -4  -8  289.57   10.90
   1   4  -8  306.97   15.00
   1  -4   8  296.37   14.40
  -1  -4  -8  282.67   14.10
  -1   4   8  294.67   16.10
  -1   4  -8  297.27   14.40
  -1  -4   8  296.77   14.20
   1  -4  -8  285.57   14.10
  -1   4  -8  284.77   16.40
   1   4   8  264.17   15.50
   1  -5   8  167.08   10.10
  -1  -5  -8  160.88   10.60
   1   5  -8  166.88   11.00
  -1   5   8  162.48   12.00
   1  -5  -8  159.28   10.50
  -1   5  -8  139.49   10.10
  -1  -5   8  162.38    9.80
  -1  -5   8  169.78   11.90
  -1   5  -8  167.28   12.80
   1   5   8  162.78   11.90
   1  -6   8   -1.50    2.70
   1   6  -8    3.40    3.70
  -1   6   8   -2.50    3.80
   1  -6   8   -1.20    4.00
  -1  -6  -8   -3.90    3.90
  -1   6  -8    1.50    3.70
  -1  -6   8   -0.30    2.60
   1  -6  -8    0.80    4.00
   1   6   8    1.20    4.30
  -1  -6   8    2.00    4.40
   1   7  -8    3.40    4.30
  -1   7   8    4.00    5.00
  -1  -7  -8   -0.80    4.20
   1  -7   8    1.00    4.80
  -1   7  -8    7.00    4.30
   1  -7  -8    4.90    4.50
  -1  -7   8    4.20    5.10
   1   7   8   -0.30    4.60
  -1   0  -9   35.00    4.20
   1   0  -9   42.30    4.30
  -1   0  -9   29.70    4.10
  -1   0   9   35.00    5.10
   1   0  -9   48.60    5.00
   1   0   9   47.40    6.00
   1   1  -9  178.78   10.10
   1   1  -9  193.38   10.10
  -1  -1  -9  191.68    8.80
  -1  -1  -9  199.68    9.70
  -1   1   9  197.48   11.70
  -1   1   9  200.88    7.40
   1  -1   9  197.88   11.30
   1  -1  -9  192.08    9.80
  -1   1  -9  196.68   10.10
   1   1   9  166.38   10.80
  -1  -1   9  187.38   11.10
   1  -1  -9  178.68    8.20
   1   1   9  182.88    7.60
  -1   1  -9  189.78   10.30
  -1  -2  -9   22.10    3.70
   1  -2   9   15.70    3.80
  -1  -2  -9   30.00    2.90
   1   2  -9   21.70    4.30
   1   2  -9   19.40    3.90
  -1   2   9   14.90    4.30
  -1   2  -9   20.00    4.30
   1   2   9   20.70    4.50
  -1   2  -9   24.80    4.10
  -1  -2   9   20.50    4.10
   1  -2  -9   18.30    3.60
  -1  -3  -9  391.56   14.90
  -1  -3  -9  403.56   17.70
   1   3  -9  385.06   18.50
   1   3  -9  392.26   19.50
   1  -3   9  402.36   18.80
  -1   3   9  387.86   19.80
  -1   3  -9  422.86   20.00
  -1   3  -9  439.46   18.80
   1   3   9  432.56   20.30
  -1  -3   9  431.06   18.80
   1  -3  -9  441.26   17.90
  -1   4   9  149.49   11.60
   1   4  -9  155.38   10.40
  -1  -4  -9  152.98   10.00
   1  -4   9  135.69    9.90
  -1  -4   9  153.18    9.90
   1  -4  -9  148.29    9.70
  -1   4  -9  137.09   11.60
   1   4   9  144.59   11.40
  -1   4  -9  151.98   10.00
   1   5  -9  100.29    9.00
   1  -5   9   99.39    8.30
  -1   5   9   90.99    9.90
  -1  -5  -9   77.89    8.30
  -1  -5   9   82.09    7.60
   1   5   9   86.79    9.50
  -1   5  -9   82.69   10.30
   1  -5  -9   98.49    8.60
  -1  -5   9  107.99   10.00
  -1   5  -9   88.09    8.40
   1  -6   9   21.40    6.10
   1   6  -9   26.70    5.80
  -1  -6  -9   33.20    6.20
   1  -6   9   23.60    5.10
  -1   6   9   27.20    6.60
  -1   6  -9   24.10    5.60
  -1  -6   9   18.90    6.10
   1  -6  -9   24.30    5.50
  -1  -6   9   29.00    5.20
   1   6   9   26.10    6.60
   1   0 -10   28.70    4.30
   1   0 -10   21.60    3.30
   1   0  10   19.60    4.40
  -1   0 -10   24.10    3.90
  -1   0 -10   28.30    3.90
  -1   0  10   23.50    5.00
   1   1 -10  213.48   11.20
   1  -1  10  209.88   12.20
  -1   1  10  212.28   13.00
  -1  -1 -10  222.38    9.80
  -1  -1 -10  218.98   10.80
   1   1 -10  210.18   11.50
  -1   1 -10  193.48   11.10
   1  -1 -10  187.28   10.60
  -1  -1  10  197.88   12.30
   1  -1 -10  190.08    9.00
  -1   1 -10  217.58   11.20
   1   1  10  196.28   12.50
  -1  -2 -10  132.49    6.40
   1   2 -10  122.59    9.40
  -1  -2 -10  130.19    8.30
   1   2 -10  101.49    8.60
   1  -2  10  134.19    9.70
  -1   2  10  145.69   10.60
   1   2  10  158.68   11.10
  -1  -2  10  142.69    9.70
   1  -2 -10  149.29    8.70
  -1   2 -10  164.68   10.20
  -1   2 -10  107.09    8.40
  -1   3  10   93.79    9.60
   1  -3  10   96.89    8.40
   1   3 -10   95.99    8.30
   1   3 -10   88.19    8.90
  -1  -3 -10   93.69    7.50
  -1   3 -10   80.69    8.80
  -1   3 -10   86.79    7.70
   1   3  10   86.09    8.80
  -1  -3  10   76.19    8.00
   1  -3 -10   75.29    7.40
  -1  -4 -10  216.78   12.40
   1   4 -10  226.38   13.50
   1  -4  10  191.08   12.50
  -1   4  10  214.68   14.40
  -1   4 -10  214.48   14.80
  -1  -4  10  226.88   12.90
  -1   4 -10  212.38   12.80
   1  -4 -10  213.38   12.30
   1   4  10  210.38   14.00
  -1  -4  10  232.68   13.70
   1   5 -10   41.80    6.90
   1  -5  10   48.10    6.80
  -1  -5 -10   36.00    6.10
  -1   5  10   52.09    8.70
   1  -5 -10   47.70    6.60
  -1  -5  10   50.09    6.50
  -1  -5  10   44.30    7.40
   1   5  10   51.89    8.60
  -1   5 -10   54.99    7.40
   1   6 -10   14.20    5.00
   1  -6  10   17.30    6.10
  -1  -6 -10    4.30    4.60
   1  -6  10   16.50    5.00
  -1   6  10   18.30    6.60
   1   6  10   10.80    5.90
  -1  -6  10    9.30    5.30
   1  -6 -10   16.10    5.20
  -1   6 -10   15.70    6.30
  -1   0 -11  151.78    9.40
  -1   0 -11  157.38    8.90
  -1   0  11  150.98   11.30
   1   0  11  149.19   10.80
   1   0 -11  161.68    9.90
   1   0 -11  142.29    8.60
   1  -1  11   48.80    6.80
  -1  -1 -11   41.60    4.40
   1   1 -11   44.10    5.50
   1   1 -11   42.40    5.80
  -1  -1 -11   38.00    5.00
  -1   1  11   37.40    6.20
   1   1  11   52.99    7.10
  -1   1 -11   48.80    5.80
  -1  -1  11   35.40    5.90
  -1   1 -11   47.30    5.60
   1  -1 -11   41.60    5.20
   1   2 -11  321.07   16.30
   1  -2  11  348.17   17.40
  -1   2  11  317.77   17.90
  -1  -2 -11  310.47   14.80
   1   2 -11  282.67   15.80
  -1   2 -11  327.37   16.50
   1   2  11  339.87   18.20
  -1  -2  11  322.57   16.80
   1  -2 -11  328.87   15.40
  -1   2 -11  287.07   15.40
  -1  -3 -11    5.80    3.70
   1  -3  11   14.30    4.50
  -1   3  11    7.00    4.70
   1   3 -11    2.50    3.50
  -1  -3  11    6.40    3.90
   1   3  11    3.90    4.00
   1  -3 -11    6.90    3.80
  -1   3 -11    4.10    4.30
  -1   3 -11    2.80    3.20
   1  -4  11  195.18   12.60
  -1  -4 -11  187.28   11.80
  -1   4  11  187.28   14.20
   1   4 -11  180.38   12.40
  -1  -4  11  182.78   12.90
  -1   4 -11  194.18   14.30
   1  -4 -11  180.28   11.50
   1   4  11  165.28   13.40
  -1   4 -11  192.58   12.20
  -1  -4  11  181.38   12.00
  -1  -5 -11   31.30    6.20
  -1   5  11   30.80    7.40
   1   5 -11   36.30    6.80
   1  -5  11   25.50    5.70
  -1  -5  11   28.20    6.30
  -1   5 -11   31.40    6.10
   1   5  11   28.80    7.30
  -1  -5  11   26.80    5.60
   1  -5 -11   21.20    5.40
  -1   0 -12    6.50    3.30
   1   0 -12    8.60    3.50
  -1   0  12    4.20    4.40
   1   0  12    5.70    4.00
   1  -1  12   83.49    9.20
  -1   1  12   93.89   10.00
  -1  -1 -12   91.59    7.80
   1   1 -12   86.39    8.20
   1   1  12   92.49    9.30
  -1  -1  12  101.59    9.70
  -1   1 -12   86.09    7.90
  -1   1 -12  108.29    8.50
   1  -1 -12  102.79    8.10
  -1   2  12   68.99    8.90
  -1  -2 -12   76.29    7.70
   1   2 -12   81.39    8.10
   1  -2  12   76.59    9.00
  -1   2 -12   94.39    8.20
  -1  -2  12   87.69    8.90
   1  -2 -12   81.39    8.00
  -1   2 -12   84.59    8.60
   1   2  12   71.09    9.10
   1  -3  12   58.49    7.90
  -1  -3 -12   62.79    6.90
  -1   3  12   70.89    9.40
   1   3 -12   60.39    7.70
  -1  -3  12   66.49    8.30
  -1   3 -12   67.19    8.50
  -1   3 -12   52.69    7.00
  -1  -3  12   83.39    8.40
   1  -3 -12   52.79    6.40
   1   3  12   71.39    9.90
  -1  -4 -12   49.99    6.90
   1   4 -12   53.39    7.70
   1  -4  12   51.99    7.60
  -1   4  12   48.80    8.80
  -1  -4  12   70.39    8.40
  -1   4 -12   65.19    8.10
   1  -4 -12   57.29    7.20
  -1  -4  12   69.39    8.60
   1   4  12   65.49    9.60
   1   0 -13    0.10    3.00
   1   0  13   -1.50    4.00
  -1   0  13    1.10    4.50
  -1   0 -13    1.50    3.20
   1  -1  13   40.20    7.20
   1   1 -13   39.40    6.20
  -1  -1 -13   36.70    5.60
  -1   1  13   37.40    7.80
   1  -1 -13   41.80    6.20
  -1  -1  13   43.90    7.60
  -1   1 -13   44.60    6.30
   1   1  13   46.90    8.00
  -1  -2 -13   -1.60    3.30
  -1   2  13    6.10    4.50
   1  -2  13   -1.70    3.90
   1   2 -13    9.10    4.00
  -1   2 -13    5.80    3.70
   1   2  13    0.80    4.80
  -1  -2  13   -1.00    4.20
  -1   2 -13   -2.90    3.60
   1  -2 -13    0.00    3.90
   1  -3  13   54.39    8.10
   1   3 -13   58.79    8.20
  -1   3  13   57.19    9.50
  -1  -3 -13   54.39    6.90
  -1  -3  13   76.79    8.40
   1  -3 -13   61.59    7.50
  -1  -3  13   59.29    8.30
  -1   3 -13   63.99    8.10
   1   3  13   57.89    9.50
  -1   0  14   70.39    9.50
   1   0 -14   69.59    8.10
   1   0  14   62.19    9.50
  -1   0 -14   69.79    7.90
  -1  -1 -14   26.00    5.50
  -1   1  14   27.80    7.50
   1   1 -14   31.90    6.00
   1  -1  14   23.50    6.80
  -1   1 -14   30.70    5.70
   1  -1 -14   27.50    5.70
   1   1  14   31.30    7.30
  -1  -1  14   19.20    6.40
  -2   0   0  364.86   12.30
   2   0   0  359.26   12.40
  -2   0   0  362.56   12.40
   2   0   0  354.96   12.60
   2   0   0  373.66   12.70
   2   1   0 6938.31  225.68
  -2   1   0 6949.20  227.08
  -2  -1   0 6802.32  228.18
   2  -1   0 6941.31  227.18
  -2  -1   0 6516.45  225.58
   2   1   0 7021.60  227.48
  -2   1   0 6473.25  227.38
   2  -1   0 6980.60  227.08
  -2   1   0 6609.54  227.08
   2  -1   0 6482.95  227.78
  -2   2   0 2825.62   95.19
  -2  -2   0 2794.52   95.29
  -2  -2   0 2816.72   94.89
  -2   2   0 2823.72   94.79
   2  -2   0 2852.31   95.19
   2   2   0 2839.62   95.09
  -2  -2   0 2875.81   93.99
   2   2   0 2774.92   95.29
   2  -2   0 2835.72   94.89
   2   2   0 2748.43   93.99
   2  -2   0 2828.52   95.09
  -2   2   0 2740.63   94.99
   2  -3   0  389.86   15.10
  -2   3   0  377.76   14.90
   2   3   0  368.06   15.40
   2   3   0  371.26   14.00
   2  -3   0  388.36   15.20
  -2  -3   0  384.86   13.90
  -2  -3   0  361.56   14.90
  -2   3   0  363.66   14.90
  -2   3   0  390.26   15.50
   2   4   0  948.41   34.80
  -2   4   0 1010.80   36.90
   2   4   0  990.70   36.70
  -2   4   0  964.90   35.90
  -2   4   0 1009.30   36.20
  -2  -4   0 1021.10   34.90
  -2  -4   0  987.50   36.10
  -2   5   0  203.28   10.60
   2  -5   0  191.18   10.50
  -2  -5   0  197.68   10.50
   2   5   0  193.58   11.00
  -2  -5   0  193.38    9.00
   2   6   0  242.98   13.70
   2  -6   0  251.57   12.80
  -2   6   0  243.68   13.00
  -2  -6   0  234.88   12.80
  -2  -6   0  264.37   11.80
   2  -6   0  231.18   12.70
   2  -7   0   -1.50    2.80
   2  -7   0   -1.80    3.20
  -2  -7   0    0.20    2.40
   2   7   0    2.30    3.70
  -2  -7   0   -1.50    3.30
  -2   7   0    3.50    3.20
  -2   8   0   22.90    5.50
   2  -8   0   16.50    4.40
   2  -8   0   13.10    4.90
   2   8   0   16.50    5.70
  -2  -8   0   10.80    4.70
  -2   0  -1 2002.10   68.09
  -2   0   1 2015.50   68.29
   2   0   1 2040.50   68.09
  -2   0   1 1988.40   67.99
  -2   0  -1 1997.20   67.99
  -2   0   1 2060.09   68.19
   2   0   1 2022.40   67.89
   2   0   1 2047.10   68.39
   2   0  -1 2205.38   68.29
   2   0  -1 2006.50   67.89
   2   0  -1 2012.90   68.29
  -2   1   1 2837.82   98.19
   2   1  -1 2845.82   98.09
  -2  -1  -1 2859.51   97.59
  -2   1   1 2890.71   97.79
  -2  -1  -1 2926.61   98.19
  -2   1   1 3013.60   97.59
  -2  -1  -1 2998.00   97.69
   2  -1   1 3027.20   98.19
   2  -1   1 2953.30   97.49
   2   1  -1 2943.91   97.89
  -2  -1   1 2960.90   97.99
  -2  -1   1 2930.91   97.69
   2   1   1 3003.50   97.69
   2   1   1 2941.51   98.19
   2  -1  -1 2743.23   98.19
  -2   1  -1 2905.21   97.49
  -2   1  -1 2882.61   98.19
   2  -1  -1 2939.51   97.59
   2  -1  -1 2907.11   97.69
  -2  -1   1 2767.02   97.99
   2   1   1 2926.91   98.19
  -2   1  -1 3119.39   98.29
  -2   2   1 1336.87   47.40
   2  -2   1 1344.87   47.20
   2  -2   1 1408.16   47.40
  -2  -2  -1 1392.86   46.50
   2  -2   1 1370.86   47.60
  -2  -2  -1 1356.16   46.80
  -2   2   1 1353.06   47.10
   2  -2   1 1373.16   46.90
   2   2  -1 1335.67   47.50
  -2   2   1 1342.27   47.00
   2   2   1 1385.26   47.00
  -2  -2   1 1386.06   46.20
   2   2   1 1344.67   47.50
   2   2   1 1365.16   46.60
  -2   2  -1 1345.77   46.90
   2  -2  -1 1400.36   47.40
  -2  -2   1 1342.27   47.30
   2  -2  -1 1353.56   47.20
  -2  -2   1 1378.06   47.50
   2  -2  -1 1374.56   47.00
  -2   2  -1 1342.37   47.70
  -2  -2   1 1492.05   46.20
  -2   3   1  583.74   22.50
  -2   3   1  592.84   22.50
   2  -3   1  593.04   22.30
  -2   3   1  575.74   22.50
  -2  -3  -1  565.24   22.10
   2  -3   1  603.44   22.60
   2   3  -1  571.24   22.80
   2  -3   1  626.44   22.50
  -2  -3  -1  586.94   21.60
   2  -3  -1  631.34   22.70
   2  -3  -1  602.24   22.50
  -2   3  -1  593.14   23.20
  -2  -3   1  626.64   21.40
  -2   3  -1  617.24   22.40
   2   3   1  605.84   23.00
  -2  -3   1  594.24   22.70
  -2  -3   1  658.63   21.40
   2   3   1  597.74   21.80
   2   4  -1  325.67   15.20
  -2  -4  -1  347.27   13.60
  -2   4   1  346.77   14.80
  -2   4   1  333.07   14.70
  -2  -4  -1  342.37   14.40
   2  -4   1  353.56   14.60
  -2  -4   1  356.06   13.50
  -2   4  -1  350.36   14.80
  -2  -4   1  331.07   14.90
   2   4   1  337.17   13.90
   2   4   1  347.57   15.30
  -2   4  -1  350.66   15.70
  -2  -4   1  370.36   13.60
   2  -4  -1  342.77   14.50
  -2  -5  -1  211.78   10.70
   2  -5   1  209.48   10.70
  -2   5   1  206.08   10.90
  -2   5   1  214.18   11.10
   2   5  -1  202.98   11.40
  -2   5  -1  216.28   11.10
  -2  -5   1  212.98   11.30
  -2  -5   1  219.58    9.60
   2  -5  -1  212.78   10.70
   2   5   1  215.78   11.70
  -2  -5   1  217.68    9.70
   2   5   1  224.58   10.30
  -2  -6  -1   64.99    6.60
   2  -6   1   68.09    6.10
  -2   6   1   63.59    6.40
  -2   6   1   65.59    6.90
   2  -6   1   71.79    7.10
   2   6  -1   75.49    7.30
   2   6   1   60.09    5.40
  -2  -6   1   70.89    5.40
  -2  -6   1   53.99    6.60
   2  -6  -1   59.29    6.40
  -2   6  -1   60.09    6.50
   2   6   1   54.99    6.70
  -2  -7  -1   78.39    8.10
  -2  -7  -1  104.89    7.60
  -2   7   1   74.69    8.00
   2  -7   1   67.89    8.00
   2  -7   1  100.29    8.00
   2   7  -1   70.79    8.30
  -2   7  -1   83.99    8.50
   2  -7  -1   95.29    8.10
   2  -7  -1   95.99    8.20
  -2  -7   1   85.29    6.40
   2   7   1   85.69    8.80
  -2  -7   1   90.79    8.60
   2   8  -1   11.10    5.10
   2  -8   1   17.40    5.30
  -2   8   1    9.70    4.70
   2  -8   1   13.50    4.90
  -2  -8  -1   10.30    4.40
   2  -8  -1    9.90    4.50
   2  -8  -1    4.40    4.00
   2   8   1   10.80    5.00
  -2   8  -1   20.40    5.10
  -2  -8   1   14.50    5.10
   2   0   2  396.26   13.80
  -2   0   2  397.66   13.80
   2   0   2  390.16   14.40
   2   0  -2  383.16   14.30
  -2   0   2  397.06   14.40
   2   0  -2  416.06   14.20
  -2   0  -2  396.66   13.90
  -2   0  -2  397.66   13.70
  -2   0   2  393.06   13.70
   2   0   2  395.66   13.90
  -2   1   2 9891.21  318.47
  -2  -1  -2 9860.11  315.07
   2  -1   2 9511.15  316.57
   2  -1   2 9455.55  315.77
  -2   1   2 9523.45  317.37
   2   1  -2 9577.84  318.37
   2   1  -2 9999.00  317.77
  -2  -1  -2 9602.14  315.57
   2  -1   2 9824.12  317.37
  -2  -1  -2 9341.46  314.87
   2  -1  -2 9483.15  314.87
   2   1   2 9099.59  319.57
  -2   1  -2 9381.86  316.77
   2   1   2 9048.09  316.37
   2  -1  -2 9372.36  318.67
  -2  -1   2 9202.68  317.17
  -2   1  -2 9060.09  316.07
   2   1   2 9270.77  315.77
  -2  -1   2 9358.86  314.77
  -2  -1   2 9358.56  317.37
  -2  -1   2 9530.15  315.17
  -2   1  -2 9367.06  316.87
  -2   2   2 3288.57  114.09
   2  -2   2 3375.16  113.29
  -2  -2  -2 3357.56  112.99
  -2  -2  -2 3397.66  113.49
   2   2  -2 3519.05  112.99
   2  -2   2 3313.27  113.79
   2   2  -2 3282.47  113.99
  -2  -2   2 3438.76  112.89
  -2  -2   2 3371.86  113.89
   2   2   2 3374.36  113.59
   2  -2  -2 3400.56  112.99
  -2   2  -2 3321.17  113.39
  -2   2  -2 3355.86  114.49
   2  -2  -2 3361.46  113.59
  -2  -2   2 3407.86  114.09
  -2   2  -2 3411.76  113.99
   2  -2  -2 3391.76  113.99
   2  -2  -2 3425.86  114.09
   2  -2  -2 3370.26  113.19
   2   2   2 3424.16  113.29
   2   2   2 3264.87  113.99
   2  -3   2  386.06   15.10
  -2  -3  -2  408.96   14.70
   2  -3   2  399.96   15.00
  -2   3   2  404.36   15.30
  -2   3   2  393.66   15.60
  -2  -3  -2  409.36   14.70
   2   3  -2  398.06   15.80
   2  -3  -2  359.36   14.80
  -2   3  -2  358.36   14.90
   2   3   2  364.86   14.80
   2   3   2  349.07   14.70
  -2  -3   2  374.66   14.00
  -2  -3   2  376.66   15.60
   2   3   2  358.26   15.50
   2  -3  -2  370.56   14.50
  -2   3  -2  375.16   16.10
  -2   4   2   74.49    5.80
  -2  -4  -2   66.19    5.10
  -2   4   2   69.89    5.60
   2   4  -2   62.19    5.80
   2  -4   2   70.89    5.20
   2   4   2   79.19    5.30
  -2  -4   2   77.39    4.40
   2   4   2   71.19    6.10
  -2   4  -2   71.79    6.60
   2  -4  -2   75.59    5.10
  -2  -4   2   67.89    5.70
  -2   4  -2   76.99    5.60
  -2  -4   2   70.49    4.40
   2   5  -2  417.46   18.90
   2  -5   2  425.76   17.90
  -2  -5  -2  407.46   17.60
  -2   5   2  388.16   18.20
  -2   5   2  402.46   18.30
  -2  -5   2  431.96   18.90
  -2   5  -2  443.36   18.40
  -2  -5   2  436.06   16.90
   2  -5  -2  433.16   17.70
  -2  -5   2  465.75   16.80
   2   5   2  435.66   19.10
   2   5   2  435.06   17.80
  -2   5  -2  455.85   20.20
  -2  -6  -2   31.40    4.70
  -2   6   2   30.50    5.00
   2  -6   2   26.10    4.90
   2  -6   2   26.10    4.20
  -2   6   2   24.90    4.50
   2   6  -2   30.30    5.10
  -2   6  -2   28.10    4.80
  -2  -6   2   24.50    4.80
   2   6   2   36.40    4.60
   2  -6  -2   27.70    4.40
   2   6   2   34.20    5.50
  -2  -6   2   37.30    3.90
  -2  -7  -2   45.40    6.00
   2   7  -2   56.39    7.50
  -2   7   2   47.90    6.30
  -2   7   2   66.59    7.50
   2  -7   2   57.39    6.30
   2  -7   2   43.10    6.70
   2  -7  -2   45.20    6.00
  -2  -7   2   45.70    6.90
  -2  -7   2   70.69    5.60
   2   7   2   55.49    7.30
  -2   7  -2   54.49    7.00
   2   7   2   48.30    5.80
  -2   8   2   18.70    5.40
  -2  -8  -2   23.10    5.10
   2   8  -2   17.80    5.70
   2  -8   2   17.30    5.50
  -2  -8   2   18.30    5.30
   2   8   2   17.10    5.40
  -2   8  -2   26.20    5.60
   2  -8  -2   22.80    5.00
   2   0   3  421.66   15.10
  -2   0   3  441.36   16.00
  -2   0   3  425.96   15.00
  -2   0   3  429.36   15.30
  -2   0  -3  426.96   15.00
  -2   0  -3  414.26   15.20
   2   0  -3  445.36   15.90
   2   0   3  430.86   15.10
   2   0   3  425.36   15.90
   2   0  -3  404.36   15.40
  -2  -1  -3  777.62   26.60
   2   1  -3  799.32   26.40
   2   1  -3  791.62   26.70
   2  -1   3  804.22   25.50
   2  -1   3  780.42   26.50
  -2   1   3  794.12   26.90
  -2  -1  -3  767.42   26.10
  -2  -1  -3  795.72   26.50
   2   1  -3  785.22   26.20
   2  -1   3  819.52   26.60
  -2  -1  -3  762.32   25.20
  -2   1  -3  707.43   25.60
   2  -1  -3  663.93   25.80
   2   1   3  669.13   26.40
  -2   1  -3  700.03   26.50
   2   1   3  699.43   25.20
  -2   1  -3  684.33   26.50
  -2  -1   3  672.23   26.00
  -2  -1   3  692.33   26.40
  -2  -1   3  685.33   26.00
  -2  -2  -3  161.88    8.00
   2   2  -3  168.78    7.50
   2  -2   3  154.28    7.20
   2   2  -3  156.48    8.10
   2  -2   3  159.48    8.00
  -2   2   3  154.68    8.40
  -2  -2  -3  151.18    6.90
   2   2   3  188.68    7.40
  -2   2  -3  214.28    8.60
  -2  -2   3  201.68    7.60
  -2  -2   3  191.28    8.10
  -2   2  -3  201.18    9.10
   2   2   3  198.28    8.40
  -2   2  -3  188.08    7.70
   2  -2  -3  192.38    7.10
   2  -2  -3  192.68    6.80
   2  -2  -3  181.98    7.80
   2  -2  -3  190.38   10.90
   2   2   3  184.78    8.30
   2  -3   3 1529.05   53.09
   2  -3   3 1507.35   53.49
  -2  -3  -3 1484.55   52.49
   2   3  -3 1501.05   52.79
   2   3  -3 1520.25   53.99
  -2   3   3 1490.55   54.19
   2   3   3 1607.94   53.19
  -2  -3   3 1545.65   54.29
   2   3   3 1539.05   53.59
  -2   3  -3 1546.45   53.39
   2  -3  -3 1564.34   52.49
  -2  -3   3 1540.95   52.49
   2  -3  -3 1567.24   53.59
   2  -3  -3 1565.04   52.89
   2   3   3 1542.95   54.09
  -2   3  -3 1502.35   54.79
  -2  -4  -3  226.88   10.00
   2  -4   3  238.08   10.80
   2   4  -3  226.58   11.60
  -2   4   3  222.18   11.40
  -2  -4   3  229.78   10.00
   2  -4  -3  238.08   10.10
   2   4   3  225.98   10.80
  -2  -4   3  232.28   11.80
  -2   4  -3  223.38   12.30
   2   4   3  219.68   11.40
  -2  -4   3  244.58    9.80
  -2   4  -3  234.38   11.00
   2  -5   3  726.53   27.30
  -2  -5  -3  718.03   26.90
  -2   5   3  734.03   28.60
  -2   5   3  734.23   28.10
   2   5  -3  728.63   28.70
  -2  -5   3  707.03   26.10
   2   5   3  717.93   28.60
   2   5   3  715.33   27.60
  -2  -5   3  703.53   28.70
  -2   5  -3  674.93   29.60
   2  -5  -3  705.63   26.80
  -2  -5   3  700.53   26.60
  -2   5  -3  700.53   27.80
   2  -6   3   67.19    6.10
  -2   6   3   75.49    7.30
  -2  -6  -3   76.79    6.40
   2   6  -3   62.49    7.40
   2  -6   3   58.19    7.10
  -2   6   3   70.89    6.90
  -2  -6   3   67.89    5.20
   2  -6  -3   67.59    6.30
  -2  -6   3   67.09    7.50
  -2   6  -3   66.19    6.80
   2   6   3   74.29    7.70
   2   6   3   62.59    6.30
   2   7  -3   82.09    8.60
   2  -7   3   87.39    7.40
   2  -7   3   72.29    8.30
  -2  -7  -3   79.59    7.40
  -2   7   3   83.79    8.50
   2  -7  -3   85.19    7.30
   2   7   3   79.39    7.50
  -2  -7   3   91.59    9.60
  -2   7  -3   81.29    8.30
   2   7   3  101.39    9.10
  -2   8   3   29.10    6.10
   2   8  -3   27.30    6.30
  -2  -8  -3   27.40    5.20
   2  -8   3   33.40    7.00
  -2  -8   3   25.20    6.20
   2  -8  -3   32.10    5.40
  -2   8  -3   32.30    6.20
   2   8   3   44.70    7.40
  -2   0   4 1784.32   58.19
   2   0  -4 1753.12   58.89
   2   0   4 1699.43   57.79
   2   0   4 1693.53   57.89
  -2   0   4 1683.13   58.89
   2   0  -4 1661.93   57.79
  -2   0  -4 1693.33   58.09
  -2   0   4 1732.93   57.69
   2   0  -4 1599.74   58.19
   2   0   4 1721.13   58.99
  -2   0  -4 1763.62   57.79
  -2  -1  -4  796.92   28.00
  -2  -1  -4  716.73   27.40
  -2  -1  -4  717.13   26.70
   2   1  -4  757.02   28.10
   2  -1   4  780.62   27.00
   2   1  -4  792.22   28.10
   2  -1   4  769.02   28.20
   2   1  -4  769.72   28.00
  -2  -1  -4  875.61   32.20
   2  -1   4  753.82   27.90
  -2   1   4  743.73   28.50
  -2   1  -4  810.22   28.50
   2   1   4  795.52   28.50
   2  -1  -4  776.62   27.60
  -2  -1   4  778.52   27.60
  -2   1  -4  836.52   27.50
  -2  -1   4  787.72   28.10
   2   1   4  828.52   26.70
  -2   1  -4  784.12   28.40
  -2  -1   4  800.52   28.10
  -2  -2  -4 2328.27   78.49
   2  -2   4 2318.37   79.19
   2  -2   4 2297.47   80.19
  -2  -2  -4 2340.17   79.99
   2   2  -4 2316.37   80.29
   2   2  -4 2347.36   79.79
   2   2  -4 2319.07   80.99
  -2   2   4 2266.37   80.79
   2  -2  -4 2482.95   78.09
   2  -2  -4 2304.57   78.39
  -2   2  -4 2299.77   79.49
  -2  -2   4 2363.96   79.69
   2  -2  -4 2377.36   79.79
   2   2   4 2445.46   78.99
   2   2   4 2384.86   80.59
  -2   2  -4 2306.07   81.09
   2   3  -4  122.99    6.50
   2   3  -4  131.39    7.50
  -2  -3  -4  127.89    5.80
   2  -3   4  136.99    7.40
   2  -3   4  127.19    7.10
  -2   3   4  124.39    7.70
  -2  -3   4  137.89    6.50
  -2   3  -4  133.59    8.50
   2  -3  -4  130.19    7.20
   2  -3  -4  133.59    5.70
   2   3   4  127.39    7.30
   2   3   4  133.29    6.40
   2   3   4  134.39    7.50
   2  -3  -4  135.19    6.20
  -2   3  -4  141.79    7.10
   2   4  -4  424.36   16.20
   2  -4   4  413.76   16.60
  -2   4   4  416.66   17.70
   2   4  -4  410.86   17.40
  -2  -4  -4  425.36   15.50
   2   4   4  383.66   16.80
   2   4   4  383.26   17.10
  -2  -4   4  398.96   17.70
  -2   4  -4  379.36   18.20
  -2  -4   4  391.06   15.50
   2  -4  -4  401.26   15.30
   2  -4  -4  387.06   15.80
   2  -4  -4  380.46   16.70
  -2   4  -4  386.36   16.60
  -2  -5  -4   17.10    3.20
   2  -5   4   16.00    3.30
  -2   5   4   20.50    4.30
   2   5  -4   19.80    4.20
   2  -5  -4    9.30    3.50
  -2  -5   4   14.20    2.50
   2  -5  -4   12.40    2.70
  -2   5  -4   11.30    4.60
  -2  -5   4    9.70    3.70
   2   5   4   18.50    3.80
   2   5   4   12.30    3.60
  -2   5  -4   15.30    3.60
  -2   6   4  126.89    9.50
   2  -6   4  138.39    8.50
  -2  -6  -4  141.99    8.10
   2   6  -4  129.69    9.90
   2   6   4  126.49    9.00
  -2   6  -4  117.59    8.80
   2  -6  -4  113.49    9.10
   2  -6  -4  123.39    7.80
   2   6   4  136.69   10.00
  -2  -6   4  141.09   10.40
  -2  -6   4  118.99    7.10
   2  -7   4   12.40    3.90
  -2  -7  -4   11.80    3.70
   2   7  -4   11.20    4.60
  -2   7   4   16.90    4.80
   2  -7   4    8.10    4.80
  -2   7  -4   11.00    4.30
   2   7   4   14.90    4.30
   2   7   4   18.40    5.20
  -2  -7   4   15.90    5.20
   2  -7  -4   11.10    3.50
   2  -7  -4   10.00    4.40
  -2   8   4   59.59    8.10
   2  -8   4   65.89    9.10
   2   8  -4   56.09    8.30
  -2  -8  -4   60.09    6.60
   2   8   4   53.49    7.70
   2  -8  -4   43.40    7.10
   2  -8  -4   56.19    6.60
  -2  -8   4   59.39    8.70
  -2   8  -4   59.39    8.00
   2   0   5  143.49    7.80
   2   0   5  151.38    6.60
   2   0   5  152.98    6.90
   2   0  -5  157.18    6.80
  -2   0   5  169.88    6.60
  -2   0  -5  163.48    6.80
   2   0  -5  163.38    7.40
  -2   0   5  151.68    8.00
  -2   0  -5  154.18    7.10
   2  -1   5 1151.98   48.20
  -2  -1  -5 1331.17   46.60
   2  -1   5 1378.86   47.70
  -2  -1  -5 1377.96   46.00
  -2   1   5 1334.47   48.10
   2  -1   5 1372.06   46.20
   2   1  -5 1428.36   47.50
   2   1  -5 1329.57   47.40
   2  -1  -5 1343.37   46.80
   2   1   5 1389.76   45.70
  -2   1  -5 1381.46   46.70
  -2  -1   5 1389.46   47.20
  -2  -1   5 1368.26   47.60
   2   1   5 1333.77   47.90
  -2   1  -5 1345.27   47.60
  -2  -2  -5 1277.97   45.70
   2  -2   5 1323.27   45.00
  -2  -2  -5 1282.97   44.20
  -2   2   5 1298.67   47.10
   2   2  -5 1272.77   46.90
   2   2  -5 1310.17   46.30
   2  -2   5 1295.97   46.20
   2   2   5 1304.47   46.80
  -2   2  -5 1296.07   47.10
  -2  -2   5 1330.27   46.00
  -2   2  -5 1354.46   45.60
   2   2   5 1341.27   44.60
   2  -2  -5 1294.17   45.60
   2  -3   5  280.97   12.50
  -2  -3  -5  263.27   12.40
   2   3  -5  258.87   12.50
  -2  -3  -5  264.67   10.50
  -2   3   5  263.27   13.30
   2  -3  -5  292.17   12.40
  -2  -3   5  289.67   11.90
   2   3   5  284.17   13.10
   2  -3  -5  292.97   10.80
  -2   3  -5  295.37   14.00
  -2   3  -5  282.17   12.20
   2   3   5  300.47   11.40
   2  -3  -5  292.47   10.10
   2  -4   5  264.27   12.10
  -2  -4  -5  266.57   12.70
  -2   4   5  262.67   13.50
  -2  -4  -5  264.87   10.50
   2   4  -5  247.98   12.80
   2  -4  -5  274.87   11.10
  -2  -4   5  257.97   13.20
   2  -4  -5  268.17   10.30
  -2  -4   5  265.27   11.40
   2  -4  -5  262.27   12.40
  -2   4  -5  248.68   12.10
   2   4   5  264.87   13.00
  -2   4  -5  261.57   14.20
  -2  -5  -5   98.19    6.00
   2  -5   5  106.29    7.30
  -2   5   5  105.09    8.60
   2   5  -5  107.29    8.30
   2  -5  -5   98.79    5.80
  -2  -5   5   91.59    8.50
   2  -5  -5   86.69    7.60
  -2   5  -5   94.99    9.40
   2   5   5   97.49    8.00
  -2  -5   5   95.69    6.10
  -2   5  -5   94.89    7.50
   2  -6   5  141.29    9.10
  -2   6   5  138.19   10.70
   2   6  -5  146.19   10.60
  -2  -6  -5  134.19    7.90
   2  -6  -5  151.98    8.00
  -2  -6   5  143.09    7.90
  -2   6  -5  143.69    9.90
   2   6   5  144.09   10.10
  -2  -6   5  131.69   10.80
   2  -6  -5  143.09   10.00
  -2   7   5    9.30    4.60
   2  -7   5    9.80    5.00
  -2  -7  -5   15.90    3.60
   2   7  -5   10.70    4.60
   2  -7   5   13.30    3.80
   2   7   5    7.30    4.20
   2  -7  -5    6.70    4.30
  -2  -7   5    0.10    4.00
  -2   7  -5   15.40    4.70
   2  -7  -5   11.30    3.20
  -2   8   5    3.80    4.70
   2   8  -5   -0.30    4.20
  -2  -8  -5    3.60    3.40
   2  -8   5    4.90    4.90
  -2  -8  -5    4.80    4.70
  -2   8  -5    7.10    4.50
   2  -8  -5    0.30    4.20
  -2  -8   5    0.60    4.60
   2   0   6   14.40    1.80
   2   0   6   10.40    2.70
  -2   0  -6    9.60    1.90
  -2   0   6    6.60    2.60
  -2   0   6    8.30    1.50
   2   0  -6    8.60    1.80
   2   0  -6    8.40    2.00
  -2   0  -6    8.30    1.90
  -2   1   6  648.04   22.50
   2   1  -6  635.24   24.90
   2   1  -6  653.73   25.00
  -2  -1  -6  649.64   24.10
  -2   1   6  672.63   26.00
   2  -1   6  623.44   25.30
  -2  -1  -6  647.74   23.50
  -2  -1   6  700.93   25.50
   2   1   6  713.13   26.10
  -2   1  -6  577.04   24.10
  -2  -1   6  676.63   25.70
   2  -1  -6  696.43   24.50
  -2   1  -6  696.23   25.30
   2  -1  -6  689.13   22.90
   2   1   6  700.93   23.20
   2  -2   6  120.79    7.40
  -2   2   6  125.79    8.00
  -2  -2  -6  118.69    6.80
   2   2  -6  127.89    7.40
   2   2  -6  111.59    7.60
  -2  -2  -6  121.49    5.30
   2   2   6  133.49    8.10
  -2   2  -6  139.69    6.90
   2  -2  -6  126.79    6.90
   2   2   6  131.99    5.60
  -2   2  -6  142.59    8.30
  -2  -2   6  134.59    7.40
  -2  -3  -6  271.77   10.40
   2   3  -6  288.07   13.10
   2  -3   6  272.37   12.70
  -2   3   6  284.17   14.00
  -2  -3  -6  274.97   12.60
  -2  -3   6  276.17   12.30
  -2   3  -6  287.87   14.20
   2   3   6  290.77   11.20
   2   3   6  293.97   13.70
  -2   3  -6  270.47   12.30
   2  -3  -6  271.77   12.40
   2  -4   6   36.30    4.50
  -2   4   6   36.20    5.50
  -2  -4  -6   37.90    3.00
   2   4  -6   38.10    5.10
  -2  -4  -6   39.00    5.00
   2  -4  -6   24.00    4.10
   2  -4  -6   33.90    2.50
   2  -4  -6   29.60    3.10
  -2   4  -6   34.10    5.80
  -2  -4   6   39.40    4.10
  -2  -4   6   26.70    4.60
   2   4   6   35.20    5.30
  -2   4  -6   27.20    4.00
   2   5  -6  414.86   20.10
  -2  -5  -6  432.26   19.90
  -2   5   6  424.76   20.90
  -2  -5  -6  439.16   17.10
   2  -5   6  433.96   19.10
   2   5   6  451.95   20.60
  -2   5  -6  466.35   22.50
   2  -5  -6  464.45   16.90
  -2  -5   6  488.05   21.40
   2  -5  -6  470.25   19.80
  -2   5  -6  462.15   19.80
  -2  -5   6  477.65   18.60
  -2  -6  -6  117.89    6.80
   2   6  -6  122.69    9.80
  -2  -6  -6  108.29    9.70
  -2   6   6  120.79   10.00
   2  -6   6  121.49    8.30
  -2  -6   6  109.19   10.30
   2  -6  -6  104.79    9.00
  -2  -6   6  112.39    7.30
  -2   6  -6  117.99    9.20
   2   6   6  110.09    9.20
   2  -6  -6  119.79    6.70
  -2  -7  -6   70.39    6.10
   2  -7   6   81.99   10.10
   2   7  -6   69.39    8.70
  -2   7   6   79.09    9.30
   2  -7   6   70.99    7.00
  -2  -7  -6   78.39    8.70
   2   7   6   69.39    8.50
  -2   7  -6   73.59    8.10
  -2  -7   6   67.29    9.10
   2  -7  -6   72.99    8.40
   2   0  -7  453.25   17.90
  -2   0  -7  478.95   18.50
  -2   0   7  470.75   19.80
   2   0   7  460.15   19.70
   2   0  -7  501.35   18.90
  -2   0   7  470.25   17.40
  -2   0  -7  498.25   18.30
   2   1  -7 1032.20   41.50
  -2   1   7 1148.89   42.90
  -2  -1  -7 1201.88   40.90
   2  -1   7 1160.38   42.50
  -2   1   7 1014.90   38.90
  -2  -1  -7 1179.38   40.30
   2   1  -7 1158.88   41.70
   2  -1  -7 1252.37   41.30
  -2  -1   7 1231.28   42.50
  -2   1  -7 1271.77   42.30
   2   1   7 1118.19   39.50
   2   1   7 1231.48   43.00
  -2   1  -7 1021.80   40.80
   2  -1  -7 1202.58   39.50
   2   2  -7   62.99    6.10
   2  -2   7   59.49    5.40
   2   2  -7   76.99    5.80
  -2  -2  -7   73.99    3.90
  -2  -2  -7   64.29    5.20
  -2   2   7   71.79    6.70
  -2  -2   7   59.79    5.40
  -2   2  -7   70.29    5.10
   2  -2  -7   53.49    4.90
   2   2   7   72.39    3.70
  -2   2  -7   66.59    6.10
   2   2   7   70.89    6.10
  -2   3   7  440.56   20.10
  -2  -3  -7  443.76   16.10
   2   3  -7  474.25   19.40
   2  -3   7  459.85   19.10
  -2  -3  -7  455.45   18.50
  -2   3  -7  461.55   20.40
  -2  -3   7  446.86   18.70
   2  -3  -7  440.26   18.30
   2   3   7  437.66   19.90
   2   3   7  439.36   16.70
  -2   3  -7  450.75   18.40
  -2   4   7  212.28   12.70
  -2  -4  -7  217.98    8.30
   2   4  -7  214.88   11.70
   2  -4   7  216.48   11.30
  -2  -4  -7  209.98   11.30
   2  -4  -7  197.98   10.80
  -2   4  -7  187.08   12.70
  -2  -4   7  203.28   10.40
  -2  -4   7  200.78   12.00
   2  -4  -7  196.58    8.20
  -2   4  -7  200.98   10.90
   2   4   7  197.48   12.00
   2  -4  -7  203.48    7.50
   2   5  -7  249.18   14.00
  -2   5   7  264.47   15.10
  -2  -5  -7  260.17   13.80
  -2  -5  -7  269.27   10.60
   2  -5   7  255.37   13.00
  -2   5  -7  276.17   16.30
  -2  -5   7  247.98   12.30
   2  -5  -7  274.37   13.60
   2  -5  -7  262.57   10.00
  -2  -5   7  242.68   14.60
   2   5   7  275.57   14.90
  -2   5  -7  245.18   13.20
   2   6  -7   81.89    8.70
  -2  -6  -7   74.49    8.20
  -2  -6  -7   93.29    5.60
  -2   6   7   87.59    9.40
   2  -6   7   94.19    7.70
  -2   6  -7   84.29    8.10
   2   6   7   79.09    8.70
  -2  -6   7   88.39    6.80
   2  -6  -7   83.09    8.20
  -2  -6   7   95.39    9.80
   2  -7   7   16.10    6.30
  -2  -7  -7   10.50    5.10
   2   7  -7    7.40    4.50
  -2   7   7   12.70    5.60
   2  -7   7   16.90    4.40
   2  -7  -7    7.60    4.70
  -2  -7   7    6.70    4.90
   2   7   7   11.60    5.00
  -2   7  -7   11.20    4.60
  -2   0  -8 1900.91   65.89
   2   0  -8 1992.20   66.49
   2   0  -8 1831.82   65.29
  -2   0   8 1843.22   67.59
   2   0   8 1859.21   67.69
  -2   0   8 1869.21   64.49
  -2   0  -8 1976.20   65.79
  -2  -1  -8   65.69    5.00
   2  -1   8   66.89    6.30
  -2   1   8   65.19    6.60
  -2   1   8   67.79    3.10
   2   1  -8   63.99    5.50
  -2  -1  -8   75.59    4.70
   2   1  -8   64.19    5.60
   2  -1  -8   66.99    5.60
  -2   1  -8   69.79    5.90
  -2  -1   8   68.19    6.30
   2   1   8   60.49    6.10
   2   1   8   64.09    3.70
  -2   1  -8   71.29    5.30
   2   2  -8  593.84   24.90
   2   2  -8  622.34   24.80
  -2  -2  -8  614.94   23.60
   2  -2   8  609.84   25.00
  -2   2   8  581.14   25.70
  -2  -2  -8  614.94   22.20
   2  -2  -8  625.24   23.90
   2   2   8  612.44   21.80
  -2   2  -8  638.74   25.50
   2   2   8  590.84   25.50
  -2   2  -8  654.73   24.30
  -2  -2   8  627.74   24.90
   2   3  -8  292.67   14.50
   2  -3   8  279.67   14.20
  -2  -3  -8  280.77   13.50
  -2  -3  -8  289.57   11.20
  -2   3   8  297.87   15.70
   2   3   8  288.87   15.40
   2   3   8  309.97   12.30
  -2   3  -8  305.57   15.60
  -2   3  -8  307.67   13.80
  -2  -3   8  280.87   13.90
   2  -3  -8  308.37   13.70
   2  -4   8   98.39    7.90
   2   4  -8   98.69    8.30
  -2   4   8  113.39    9.70
  -2  -4  -8   93.39    5.00
  -2  -4  -8   94.79    8.00
  -2  -4   8  109.79    7.70
   2  -4  -8  117.49    8.00
  -2   4  -8  118.89    8.20
   2   4   8   95.29    8.90
  -2   4  -8  103.89   10.20
  -2  -4   8  127.79    9.40
  -2  -5  -8   38.10    5.60
   2   5  -8   50.59    6.80
  -2  -5  -8   42.20    3.80
   2  -5   8   40.00    5.60
  -2   5   8   52.19    7.60
  -2   5  -8   49.20    8.20
   2   5   8   32.40    6.30
  -2   5  -8   46.00    6.00
  -2  -5   8   37.40    6.30
  -2  -5   8   48.30    5.60
   2  -5  -8   48.60    6.20
  -2  -6  -8   35.40    6.00
  -2   6   8   42.80    7.70
   2  -6   8   37.80    5.60
   2   6  -8   37.20    6.50
  -2   6  -8   45.70    6.30
   2  -6  -8   33.60    6.00
   2   6   8   38.90    6.90
  -2  -6   8   35.50    5.10
  -2  -6   8   44.10    7.20
  -2  -7  -8    1.70    4.70
   2   7  -8   -2.10    4.10
   2  -7   8    9.70    5.50
  -2   7   8   -0.40    4.80
   2   7   8    6.50    4.90
  -2  -7   8    4.50    4.70
   2  -7  -8    2.70    4.40
  -2   7  -8    1.40    6.40
  -2   0  -9   12.10    2.80
  -2   0   9   10.80    1.90
  -2   0   9    9.50    3.40
   2   0  -9    7.50    2.40
   2   0   9    5.30    3.00
  -2   0  -9   10.60    2.90
   2   0  -9   10.10    3.00
   2   1  -9   68.69    6.00
  -2  -1  -9   66.29    4.90
  -2   1   9   66.29    7.20
  -2  -1  -9   62.09    5.30
  -2   1   9   69.79    3.20
   2  -1   9   62.79    6.60
   2   1  -9   68.59    5.90
  -2   1  -9   67.19    6.30
   2  -1  -9   67.79    5.70
  -2  -1   9   61.69    6.20
  -2   1  -9   71.29    5.70
   2   1   9   63.59    7.20
   2   2  -9  428.56   19.20
  -2   2   9  433.96   20.50
   2   2  -9  403.16   18.90
   2  -2   9  428.06   19.50
  -2  -2  -9  446.96   16.40
  -2  -2  -9  436.46   17.80
   2   2   9  456.75   20.40
  -2   2  -9  453.75   19.60
  -2   2  -9  374.26   18.00
  -2  -2   9  440.16   19.20
   2  -2  -9  426.86   17.90
  -2  -3  -9  211.08   11.00
  -2   3   9  208.98   13.30
   2  -3   9  196.08   11.70
   2   3  -9  216.48   12.20
  -2  -3  -9  211.88    8.60
  -2   3  -9  207.58   12.90
  -2   3  -9  212.18   11.30
  -2  -3   9  208.28   11.60
   2   3   9  191.08   12.80
   2  -3  -9  200.98   10.90
  -2  -4  -9  207.18   11.50
   2  -4   9  213.98   11.90
   2   4  -9  218.68   12.30
  -2   4   9  193.78   13.30
  -2  -4   9  187.58   12.10
   2   4   9  176.18   12.60
  -2  -4   9  177.18   10.90
  -2   4  -9  171.38   10.80
   2  -4  -9  189.38   11.10
  -2   4  -9  174.58   13.00
   2   5  -9   10.20    4.50
  -2  -5  -9    6.30    4.30
   2  -5   9    0.00    3.30
  -2   5   9    6.60    4.70
   2   5   9    8.60    4.80
  -2   5  -9    5.40    3.60
  -2   5  -9    4.50    4.90
  -2  -5   9    6.60    3.20
  -2  -5   9   -0.10    3.70
   2  -5  -9    9.80    4.10
   2  -6   9   64.69    7.40
  -2   6   9   59.19    9.10
   2   6  -9   59.29    8.00
  -2  -6  -9   52.49    7.00
   2   6   9   59.29    8.90
   2  -6  -9   58.19    7.30
  -2   6  -9   62.39    7.60
  -2  -6   9   65.39    9.10
   2   0  10   47.00    6.50
   2   0 -10   40.70    5.30
  -2   0 -10   36.90    4.50
  -2   0 -10   42.10    4.70
  -2   0  10   32.70    5.40
   2   1 -10  168.68   10.50
  -2   1  10  188.28   12.20
   2  -1  10  172.58   11.40
  -2  -1 -10  165.48    9.40
  -2   1  10  176.38    7.50
  -2  -1 -10  184.68    9.00
  -2  -1  10  199.58   11.80
  -2   1 -10  177.28   10.50
  -2   1 -10  190.18   10.20
   2  -1 -10  189.48   10.20
   2   1  10  188.68   12.10
  -2   2  10   85.29    8.30
  -2  -2 -10   99.19    6.90
   2  -2  10   66.59    7.40
   2   2 -10   61.39    7.20
  -2  -2 -10   90.59    5.30
  -2   2 -10   64.49    6.50
   2  -2 -10   79.69    6.80
  -2   2 -10   86.89    7.90
   2   2  10   99.69    9.00
  -2  -2  10   84.69    7.80
   2  -3  10  481.95   22.50
  -2   3  10  507.55   24.30
  -2  -3 -10  500.95   21.10
   2   3 -10  488.05   22.60
   2   3  10  498.55   23.90
   2  -3 -10  509.75   21.40
  -2   3 -10  504.25   21.80
  -2  -3  10  504.35   22.20
  -2   3 -10  507.85   23.50
  -2  -3  10  525.05   22.40
  -2   4  10  175.08   13.30
   2  -4  10  158.18   11.30
   2   4 -10  182.28   11.80
  -2  -4 -10  175.58   10.80
   2  -4 -10  159.88   10.60
  -2  -4  10  173.98   12.10
  -2  -4  10  165.48   10.70
   2   4  10  150.68   12.30
  -2   4 -10  162.88   10.80
  -2   4 -10  162.28   13.00
  -2   5  10  176.78   14.10
   2  -5  10  190.08   12.20
   2   5 -10  203.38   13.20
  -2  -5 -10  202.68   12.30
   2   5  10  180.38   13.70
  -2  -5  10  173.18   11.30
  -2  -5  10  193.38   13.30
  -2   5 -10  178.48   14.10
  -2   5 -10  170.28   11.70
   2  -5 -10  167.88   11.80
  -2  -6 -10   32.00    6.30
   2  -6  10   25.30    5.50
  -2   6  10   25.20    7.00
   2   6 -10   20.00    5.70
   2  -6 -10   22.70    5.80
  -2  -6  10   19.80    6.50
   2   6  10   19.60    6.40
  -2   0 -11    4.50    3.00
   2   0 -11    5.60    3.30
  -2   0 -11    5.30    2.90
  -2   0  11    4.90    3.60
  -2   0  11    4.20    2.40
   2   0  11    7.60    3.80
   2   1 -11  330.97   16.00
  -2  -1 -11  320.27   14.60
   2  -1  11  298.27   16.20
  -2  -1 -11  306.87   13.70
  -2   1  11  303.07   17.10
   2  -1 -11  311.07   15.00
  -2  -1  11  305.47   14.20
   2   1  11  301.87   16.70
  -2   1 -11  321.07   15.60
  -2   1 -11  326.87   15.20
  -2  -1  11  309.67   16.60
   2   2 -11    2.30    3.20
  -2  -2 -11    1.60    3.30
  -2   2  11    0.60    3.70
   2  -2  11    2.40    3.80
  -2   2 -11    7.20    3.30
  -2  -2  11    0.00    3.00
   2  -2 -11    2.30    3.30
  -2  -2  11    4.00    3.70
  -2   2 -11    4.40    3.70
   2   2  11    1.20    3.40
  -2   3  11   97.09   10.40
  -2  -3 -11   95.79    8.10
   2   3 -11   73.59    8.60
   2  -3  11   94.99    9.00
   2  -3 -11  109.19    8.40
   2   3  11  117.69   10.70
  -2  -3  11  120.59    9.30
  -2   3 -11   82.49    7.90
  -2  -3  11  112.49    9.40
  -2   3 -11  103.49    9.90
   2   4 -11    8.60    4.30
   2  -4  11    8.70    4.40
  -2  -4 -11   13.90    4.60
  -2   4  11   13.20    5.50
   2   4  11   17.10    5.50
  -2  -4  11   15.50    5.00
  -2   4 -11    9.70    5.40
  -2  -4  11   18.80    4.70
   2  -4 -11   11.70    4.50
  -2   4 -11   14.80    4.60
  -2  -5 -11   29.90    5.80
   2  -5  11   27.60    6.00
  -2   5  11   52.89    9.30
   2   5 -11   45.90    7.30
  -2  -5  11   39.10    7.10
  -2   5 -11   38.50    7.80
  -2  -5  11   42.90    6.40
   2  -5 -11   34.90    6.10
   2   5  11   35.50    7.60
  -2   0 -12  108.09    8.30
   2   0  12   86.99    9.60
  -2   0  12   97.29    9.50
  -2   0 -12  101.09    7.80
   2   0 -12  102.99    8.70
  -2  -1 -12   28.80    4.90
  -2   1  12   30.80    6.70
   2   1 -12   36.20    5.80
   2  -1  12   28.70    6.30
  -2  -1  12   23.20    5.10
  -2   1 -12   28.00    4.90
  -2  -1  12   20.00    5.60
   2   1  12   27.10    6.30
  -2   1 -12   23.90    4.90
   2  -1 -12   25.60    5.00
  -2   2  12    3.80    4.60
   2   2 -12   11.80    4.10
  -2  -2 -12    3.40    3.60
   2  -2  12    2.40    3.90
   2  -2 -12    1.60    3.40
  -2   2 -12    7.80    4.00
   2   2  12    9.90    5.20
  -2   2 -12    5.50    3.40
  -2  -2  12   10.10    4.50
  -2  -2  12    2.70    3.60
   2  -3  12   35.30    6.50
  -2  -3 -12   29.30    5.10
   2   3 -12   26.20    5.80
  -2   3  12   33.10    7.60
  -2   3 -12   33.40    6.70
  -2  -3  12   45.70    6.50
  -2  -3  12   37.00    6.50
   2   3  12   42.50    7.80
   2  -3 -12   23.70    5.20
  -2   3 -12   30.50    5.60
  -2   4  12   64.19    9.70
  -2  -4 -12   59.49    7.20
   2  -4  12   66.59    8.50
   2   4 -12   60.49    8.50
  -2  -4  12   69.19    8.60
   2  -4 -12   64.39    7.50
   2   4  12   75.79   10.20
  -2   4 -12   74.99    8.60
  -2   4 -12   70.59    9.70
  -2  -4  12   85.09    8.70
   2   0  13  135.19   12.00
  -2   0  13  170.48   13.10
  -2   0 -13  153.98   10.20
   2   0 -13  150.38   10.80
   2   1 -13    0.10    3.00
   2  -1  13   -2.30    3.90
  -2  -1 -13   -2.80    3.10
  -2   1  13   -1.50    3.70
  -2  -1  13   -5.90    3.40
   2   1  13    4.30    4.00
  -2   1 -13    1.10    3.00
   2  -1 -13    0.10    3.20
   2   2 -13   72.89    8.50
   2  -2  13   66.49    8.80
  -2  -2 -13   70.59    7.40
  -2   2  13   80.49   10.70
   2   2  13   92.19   11.00
  -2   2 -13   77.79    8.90
  -2   2 -13   75.59    7.90
   2  -2 -13   82.39    8.40
  -2  -2  13   84.39    9.80
  -2  -3 -13    3.50    3.80
   2   3 -13    1.60    3.70
  -2   3  13    7.00    5.60
   2  -3  13    1.80    4.00
  -2   3 -13    3.30    3.60
   2  -3 -13    5.40    4.40
  -2   3 -13   -1.10    4.40
   2   3  13    4.10    5.00
  -2  -3  13    7.40    4.00
  -2  -3  13    7.00    4.50
  -2   0 -14   40.20    6.30
   2   0 -14   41.50    6.50
   2   0  14   47.00    8.00
  -2   0  14   43.40    8.40
   2   1 -14   26.30    5.70
   2  -1  14   43.20    7.80
  -2  -1 -14   24.50    5.40
  -2   1  14   21.10    6.90
  -2  -1  14   27.70    7.00
  -2   1 -14   27.00    5.40
   2   1  14   21.00    6.60
   2  -1 -14   15.50    4.80
   3   0   0   -1.40    0.70
   3   0   0   -0.20    0.50
   3   0   0   -1.20    0.70
   3   0   0   -0.80    0.40
  -3   0   0   -1.30    0.50
  -3   0   0   -1.40    0.40
  -3   1   0 5827.12  201.98
  -3  -1   0 6166.58  200.78
   3   1   0 6002.00  201.28
  -3   1   0 6052.89  200.88
   3  -1   0 6014.10  201.78
  -3  -1   0 6149.28  200.58
   3  -1   0 5948.10  202.98
   3   1   0 5941.61  200.78
   3   1   0 6005.20  200.88
  -3  -1   0 5951.30  202.28
   3  -1   0 6147.28  201.88
  -3   2   0  483.55   17.70
  -3  -2   0  486.85   18.00
   3  -2   0  499.95   18.40
  -3   2   0  498.55   18.30
   3   2   0  473.65   18.40
  -3  -2   0  483.85   16.80
   3  -2   0  486.75   18.10
   3  -2   0  491.05   17.80
   3   2   0  489.75   18.10
   3   2   0  478.85   16.90
  -3   2   0  474.95   18.30
  -3   3   0 2950.30  100.59
   3   3   0 2844.92   98.79
  -3   3   0 2820.72  100.19
  -3  -3   0 2901.41  100.09
   3   3   0 2929.91  100.79
   3  -3   0 3125.89  100.69
   3  -3   0 3069.69  100.29
  -3  -3   0 2969.40   98.69
  -3   3   0 2897.61   99.79
  -3  -4   0  266.47   12.30
  -3   4   0  272.87   12.40
  -3   4   0  268.07   12.90
  -3  -4   0  286.37   10.80
   3   4   0  275.07   13.00
   3   4   0  280.27   11.00
  -3   4   0  269.27   12.20
   3   5   0  664.83   26.80
  -3  -5   0  659.53   24.10
  -3  -5   0  645.14   25.90
  -3   5   0  667.83   25.90
  -3   6   0    1.80    2.90
   3   6   0    1.90    3.20
   3  -6   0   -1.90    2.60
  -3  -6   0    0.70    2.70
   3  -6   0   -0.70    2.60
  -3  -6   0   -1.00    1.90
   3   7   0  128.59   10.70
  -3   7   0  129.09    9.90
  -3  -7   0  130.89   10.00
   3  -7   0  133.69    9.70
  -3  -7   0  140.59    8.30
   3  -7   0  148.59   10.30
   3   8   0   -1.30    4.10
   3  -8   0   -0.20    3.80
  -3  -8   0   -0.30    3.60
  -3   8   0    3.30    3.60
   3  -8   0   -3.20    3.10
  -3   0  -1 1141.89   39.90
   3   0  -1 1208.08   39.70
  -3   0   1 1157.48   39.80
   3   0   1 1210.48   39.50
  -3   0   1 1257.47   39.70
   3   0  -1 1139.29   39.30
   3   0  -1 1178.58   39.80
  -3   0  -1 1141.49   39.40
  -3   0   1 1146.39   39.30
   3   0   1 1142.49   39.30
   3   0   1 1162.88   39.90
  -3   1   1 2218.98   76.89
  -3   1   1 2307.87   77.09
  -3  -1  -1 2327.47   77.69
  -3  -1  -1 2238.78   76.99
   3   1  -1 2269.67   76.69
   3   1  -1 2166.28   77.29
  -3  -1  -1 2320.37   76.99
   3  -1   1 2253.37   77.69
   3  -1   1 2240.08   76.59
  -3   1   1 2181.78   77.69
  -3  -1   1 2226.18   77.29
   3   1   1 2390.06   77.09
  -3  -1   1 2345.87   76.59
   3   1   1 2317.87   77.09
  -3   1  -1 2356.16   76.69
   3  -1  -1 2430.06   76.89
   3   1   1 2304.77   77.59
   3  -1  -1 2363.06   76.99
  -3   1  -1 2297.27   77.59
  -3   1  -1 2437.96   77.89
   3  -2   1 1219.58   41.20
   3  -2   1 1182.68   41.10
  -3  -2  -1 1231.88   40.00
  -3  -2  -1 1207.38   40.50
   3   2  -1 1190.28   41.20
  -3   2   1 1232.98   40.70
   3  -2   1 1212.38   40.40
   3  -2   1 1241.58   41.30
  -3   2   1 1211.58   41.30
  -3  -2   1 1184.48   39.40
   3  -2  -1 1144.39   40.50
  -3  -2   1 1146.49   39.50
   3   2   1 1118.19   41.10
   3   2   1 1172.28   40.60
  -3  -2   1 1139.09   40.80
   3   2   1 1153.98   40.00
   3  -2  -1 1119.39   40.60
  -3  -2   1 1142.59   41.10
  -3   2  -1 1127.19   40.20
   3  -2  -1 1161.38   41.10
  -3   2  -1 1136.49   41.30
   3   3  -1 1212.08   44.80
  -3   3   1 1240.08   44.30
  -3   3   1 1199.08   44.50
  -3  -3  -1 1248.68   43.10
  -3  -3  -1 1212.48   43.90
  -3   3   1 1215.68   44.10
   3  -3   1 1218.28   44.40
   3  -3   1 1301.27   44.70
   3  -3   1 1226.38   44.00
  -3  -3   1 1279.77   44.50
   3   3   1 1256.07   44.80
  -3   3  -1 1299.27   45.20
  -3  -3   1 1293.47   42.80
   3  -3  -1 1290.27   44.30
  -3  -3   1 1298.77   42.80
  -3   3  -1 1278.67   44.00
   3   3   1 1309.37   43.40
  -3   4   1  106.59    6.40
   3   4  -1  113.09    7.40
  -3   4   1  102.89    6.70
  -3  -4  -1  108.79    5.20
  -3   4   1  113.79    6.80
   3  -4   1   97.89    6.40
  -3  -4  -1  120.79    6.40
  -3   4  -1   80.79    6.70
  -3  -4   1   81.79    4.70
  -3   4  -1   88.59    6.00
  -3  -4   1   82.59    6.30
  -3  -4   1   87.19    4.70
   3   4   1   85.49    5.20
   3   4   1   82.59    6.70
   3   5  -1  185.38   10.90
  -3   5   1  183.48   10.30
   3  -5   1  214.68   10.50
  -3  -5  -1  210.38    9.80
  -3   5   1  180.38   10.40
  -3  -5  -1  180.38   10.00
   3  -5  -1  190.18   10.00
   3   5   1  194.58   11.10
  -3  -5   1  194.58    8.50
   3   5   1  188.48    9.20
  -3  -5   1  211.38    8.90
  -3   5  -1  187.58   11.30
  -3  -5   1  187.58   10.40
  -3   5  -1  185.68   10.20
   3   6  -1  140.79   10.30
  -3   6   1  155.08    9.60
   3  -6   1  142.99    9.70
  -3  -6  -1  149.39    9.30
  -3   6   1  148.69    9.60
   3  -6   1  146.59    9.30
  -3  -6   1  128.89    9.40
  -3  -6   1  150.98    7.70
   3  -6  -1  133.49    9.10
   3   6   1  153.68   10.40
   3   6   1  146.69    8.10
  -3   6  -1  142.59    9.40
  -3  -7  -1  144.79    8.70
  -3  -7  -1  127.79    9.50
  -3   7   1  127.39    9.60
   3   7  -1  133.49   11.00
   3  -7   1  137.29   10.40
   3  -7   1  120.79    9.20
  -3  -7   1  116.09    9.80
   3  -7  -1  121.99    9.30
   3   7   1  141.99   10.90
  -3   7  -1  128.19    9.80
  -3  -7   1  147.79   10.70
   3  -7  -1  122.39    9.80
  -3   8   1   26.00    5.70
  -3  -8  -1   32.40    5.90
   3  -8   1   40.20    7.10
   3   8  -1   24.70    6.10
   3  -8   1   30.40    5.70
   3  -8  -1   16.40    4.90
   3   8   1   34.50    6.70
  -3   8  -1   30.90    5.90
  -3  -8   1   19.40    5.50
   3  -8  -1   20.90    5.40
   3   0  -2  232.88    8.70
   3   0  -2  218.48    8.10
  -3   0   2  221.48    8.10
   3   0  -2  226.58    8.80
  -3   0  -2  220.98    8.10
  -3   0  -2  220.08    8.20
   3   0   2  227.68    8.90
  -3   0  -2  222.98    8.40
   3   0   2  239.28    8.40
  -3   0   2  228.18    8.80
  -3   1   2 4219.88  142.29
   3   1  -2 4200.38  141.79
   3   1  -2 4126.29  141.89
   3  -1   2 4266.17  142.09
  -3  -1  -2 4198.88  141.09
  -3   1   2 4253.77  141.19
  -3   1   2 4318.87  141.59
   3  -1   2 4218.78  140.89
  -3  -1  -2 4268.27  141.79
   3  -1   2 4196.38  141.89
   3   1  -2 4287.27  141.79
  -3  -1  -2 4351.06  141.99
  -3   1  -2 4321.37  142.19
  -3   1  -2 4139.69  142.09
  -3  -1   2 4326.07  141.29
   3   1   2 4284.17  141.19
   3  -1  -2 4317.87  141.49
   3   1   2 4053.09  141.79
  -3  -1   2 4172.08  141.69
  -3   1  -2 4099.09  140.89
  -3  -1   2 4213.98  141.79
   3   1   2 4150.28  141.79
   3  -1  -2 4281.97  141.19
   3   2  -2  397.06   14.10
  -3   2   2  400.06   13.10
   3  -2   2  385.46   14.00
   3   2  -2  395.96   12.50
  -3  -2  -2  404.56   13.40
  -3   2   2  396.46   14.30
  -3  -2  -2  394.56   13.00
   3  -2   2  404.26   13.00
   3  -2  -2  312.47   13.00
   3   2   2  315.97   13.00
   3  -2  -2  316.07   13.40
   3   2   2  312.27   13.70
   3  -2  -2  325.77   13.80
  -3  -2   2  328.77   13.60
   3   2   2  320.37   13.10
  -3  -2   2  325.47   12.30
   3  -2  -2  306.67   12.70
  -3   2  -2  299.27   13.90
  -3   2  -2  317.67   13.70
  -3   2  -2  309.37   12.80
  -3  -2   2  322.37   13.60
  -3   3   2    7.80    2.50
   3  -3   2   15.20    2.60
  -3   3   2    2.80    2.00
   3   3  -2    7.70    2.40
   3  -3   2    7.70    2.00
  -3  -3  -2    6.30    1.90
  -3  -3  -2    8.90    1.70
   3   3   2   10.80    2.00
   3  -3  -2    6.80    1.80
  -3  -3   2    6.70    2.40
  -3   3  -2    9.90    2.90
  -3   3  -2    8.60    2.10
   3   3   2   10.70    2.70
  -3  -3   2    8.90    1.40
  -3  -4  -2 1400.96   49.80
  -3   4   2 1430.36   51.09
  -3   4   2 1399.56   50.29
  -3  -4  -2 1431.96   49.40
   3  -4   2 1459.15   50.59
   3   4  -2 1389.66   51.19
  -3  -4   2 1457.15   48.70
   3   4   2 1410.96   49.80
   3  -4  -2 1412.66   49.80
   3   4   2 1413.06   51.19
  -3   4  -2 1442.36   51.99
  -3   4  -2 1399.46   50.19
  -3  -4   2 1405.86   48.80
  -3  -4   2 1427.26   50.99
  -3   5   2    2.60    2.50
  -3  -5  -2    0.90    2.40
   3   5  -2    4.80    2.90
  -3   5   2    0.60    2.50
   3  -5   2    2.30    2.50
  -3   5  -2    5.20    2.70
  -3  -5   2    3.70    1.60
  -3  -5   2    2.30    1.60
   3   5   2    3.10    2.80
   3   5   2    0.90    2.00
  -3  -5   2    1.80    2.90
   3  -5  -2    4.20    2.40
  -3   5  -2    1.90    3.10
   3  -6   2  179.18   10.40
  -3   6   2  192.68   11.20
  -3  -6  -2  174.48   10.30
  -3   6   2  182.18   10.80
   3   6  -2  180.28   11.50
  -3  -6   2  185.68   11.50
  -3  -6   2  198.08    8.90
   3   6   2  192.38   11.80
  -3   6  -2  185.08   10.80
   3   6   2  174.98    9.80
   3  -6  -2  177.38   10.20
   3  -7   2    1.50    3.10
  -3  -7  -2   -0.50    3.20
   3  -7   2    1.20    3.60
   3   7  -2   -0.20    3.60
  -3   7   2    3.70    3.50
  -3   7   2    1.50    3.40
  -3   7  -2    5.50    3.60
   3   7   2    3.40    2.90
   3   7   2    7.40    4.10
   3  -7  -2    3.70    3.20
  -3  -7   2   -0.80    4.00
   3  -8   2   63.69    7.50
   3  -8   2   46.20    7.60
  -3  -8  -2   53.19    6.70
   3   8  -2   51.49    8.00
   3   8   2   51.19    8.10
  -3  -8   2   46.50    7.30
  -3   8  -2   49.60    7.00
   3  -8  -2   44.70    6.40
  -3   0   3 2710.73   92.69
   3   0   3 2766.62   93.79
   3   0   3 2815.52   92.89
  -3   0   3 2739.13   93.79
   3   0  -3 2812.92   93.79
  -3   0  -3 2788.32   93.19
   3   0   3 2750.82   92.99
  -3   0  -3 2781.32   92.79
  -3   0   3 2802.32   92.89
   3   0  -3 2782.42   93.49
   3  -1   3 4442.96  144.39
  -3   1   3 4129.39  145.89
   3  -1   3 4272.67  145.49
   3  -1   3 4290.07  145.69
   3   1  -3 4389.96  145.59
   3   1  -3 4235.68  145.19
  -3  -1  -3 4245.38  145.49
  -3  -1  -3 4184.58  144.39
  -3  -1  -3 4199.98  145.59
  -3   1  -3 4473.15  145.99
   3   1   3 4258.27  145.69
  -3  -1   3 4341.87  145.29
  -3  -1   3 4461.85  145.69
   3  -1  -3 4397.16  145.09
  -3   1  -3 4367.56  145.79
   3   1   3 4491.65  144.59
  -3  -1   3 4324.27  145.19
  -3  -1   3 4453.85  145.39
  -3   1  -3 4429.06  144.99
  -3   2   3  774.42   30.60
   3  -2   3  784.42   30.20
   3  -2   3  799.42   29.10
   3   2  -3  779.82   30.20
  -3  -2  -3  787.92   28.90
   3   2  -3  817.62   29.30
  -3  -2  -3  818.02   30.10
   3   2   3  876.51   30.50
  -3   2  -3  869.51   29.50
  -3  -2   3  870.11   29.40
  -3   2  -3  871.71   31.10
   3  -2  -3  873.91   28.80
   3  -2  -3  883.51   29.80
  -3  -2   3  831.92   31.70
   3   2   3  862.81   30.20
  -3   2  -3  850.51   30.60
   3  -2  -3  876.91   28.70
  -3  -2   3  886.51   30.50
   3   2   3  893.71   29.50
  -3  -3  -3  544.15   20.20
   3   3  -3  564.84   20.30
  -3   3   3  538.95   21.90
   3  -3   3  532.85   20.50
   3  -3   3  552.94   21.40
   3   3  -3  522.65   21.60
  -3  -3  -3  579.94   21.80
  -3  -3   3  561.74   19.90
   3  -3  -3  580.34   20.20
   3  -3  -3  575.14   21.10
   3   3   3  564.84   21.20
   3   3   3  551.14   21.80
   3  -3  -3  567.94   20.40
   3   3   3  578.84   22.00
  -3   3  -3  551.14   20.80
  -3  -3   3  554.44   21.80
  -3   3  -3  558.44   22.60
   3  -4   3  119.69    7.00
   3   4  -3  108.79    7.50
  -3  -4  -3  109.69    6.20
  -3   4   3  112.79    7.60
   3   4   3  116.69    7.70
  -3   4  -3  108.09    7.90
   3  -4  -3  117.89    6.20
  -3  -4   3  111.09    5.40
   3   4   3  113.89    6.70
  -3  -4   3  106.49    5.70
  -3  -4   3  107.29    7.60
  -3   4  -3  117.29    6.80
  -3  -5  -3   58.89    5.50
  -3   5   3   62.79    6.70
   3   5  -3   72.99    6.90
   3  -5   3   84.49    6.30
   3   5   3   79.69    7.20
  -3  -5   3   87.09    7.40
  -3  -5   3   83.99    4.80
   3  -5  -3   81.09    5.80
  -3  -5   3   77.99    5.00
  -3   5  -3   83.89    6.40
   3   5   3   82.39    6.20
  -3   5  -3   71.69    7.90
  -3   6   3  252.77   13.70
   3  -6   3  261.57   12.80
   3   6  -3  254.67   13.90
  -3  -6  -3  267.27   12.40
  -3  -6   3  243.58   10.60
   3  -6  -3  238.28   11.90
  -3  -6   3  225.38   13.60
   3   6   3  241.58   12.30
  -3   6  -3  227.08   14.70
  -3   6  -3  222.78   12.60
   3   6   3  229.48   13.80
   3   7  -3   23.60    5.60
  -3   7   3   17.80    5.00
  -3  -7  -3   21.40    4.50
   3  -7   3   26.80    4.70
   3  -7   3   18.00    5.30
  -3   7  -3   20.50    4.80
   3   7   3   24.60    4.50
   3   7   3   23.20    5.70
  -3  -7   3   23.40    5.60
   3  -7  -3   25.10    4.50
   3  -7  -3   13.70    4.30
  -3  -8  -3   10.70    4.20
   3  -8   3    2.10    4.30
  -3   8   3    7.50    4.70
   3   8  -3   13.90    5.30
  -3  -8   3    9.90    5.00
   3   8   3   12.30    5.30
  -3   8  -3    7.70    4.30
   3  -8  -3    8.80    3.80
   3  -8  -3    4.10    4.00
  -3   0   4  448.46   16.00
   3   0   4  441.86   17.30
  -3   0   4  462.45   16.20
  -3   0  -4  452.25   16.50
   3   0   4  445.46   16.20
   3   0   4  452.45   16.30
   3   0  -4  476.75   17.40
   3   0  -4  413.06   16.70
  -3   0   4  464.35   16.60
  -3   0   4  456.25   17.40
  -3   0  -4  451.05   16.10
  -3  -1  -4 1777.42   61.69
   3   1  -4 1853.11   62.19
  -3  -1  -4 1875.91   62.29
  -3  -1  -4 1773.62   61.09
   3  -1   4 1797.92   62.49
   3  -1   4 1823.72   62.19
   3   1  -4 1938.41   62.49
   3  -1   4 1900.61   61.09
  -3   1   4 1835.22   62.89
  -3   1  -4 1865.11   61.39
  -3   1  -4 1764.72   62.49
   3  -1  -4 1778.92   61.89
  -3  -1   4 1719.73   62.09
   3   1   4 1719.33   62.59
   3   1   4 1806.12   60.99
  -3  -1   4 1863.91   62.59
  -3  -1   4 1756.92   61.99
  -3  -1   4 1780.02   62.29
   3  -2   4  705.33   24.30
   3  -2   4  690.43   25.60
   3   2  -4  697.03   24.90
  -3  -2  -4  690.63   23.90
   3   2  -4  695.93   25.70
  -3   2   4  679.33   26.20
  -3  -2   4  674.03   24.90
  -3   2  -4  695.13   24.60
  -3  -2   4  685.93   25.70
   3   2   4  672.93   25.60
   3  -2  -4  684.73   25.00
   3   2   4  706.43   24.40
  -3   2  -4  713.63   26.50
  -3   3   4  535.65   22.00
   3   3  -4  532.65   21.60
   3  -3   4  551.94   20.30
   3  -3   4  550.74   21.40
   3   3  -4  566.84   20.50
  -3  -3  -4  551.84   19.80
   3  -3  -4  543.05   20.90
  -3   3  -4  551.74   20.70
   3   3   4  557.04   21.70
   3   3   4  557.34   21.40
   3  -3  -4  573.24   19.90
   3   3   4  541.55   20.40
  -3   3  -4  527.45   22.50
   3  -3  -4  570.54   19.50
  -3  -3   4  543.55   21.80
  -3  -3   4  551.74   20.20
   3  -4   4   21.90    3.40
   3   4  -4   22.30    3.00
   3   4  -4   23.40    4.00
  -3   4   4   16.10    3.80
  -3  -4  -4   20.00    2.70
   3  -4  -4   25.30    3.80
   3  -4  -4   26.80    2.80
  -3   4  -4   26.70    4.80
   3   4   4   20.90    3.50
  -3  -4   4   25.10    4.20
   3  -4  -4   27.00    3.10
  -3  -4   4   25.20    2.70
  -3   4  -4   27.40    3.60
   3   4   4   29.80    4.50
  -3   5   4  768.52   31.30
   3  -5   4  747.83   29.90
   3   5  -4  746.63   31.00
  -3  -5  -4  761.02   28.70
  -3   5  -4  777.32   30.10
   3  -5  -4  802.52   28.80
   3   5   4  806.52   31.20
  -3  -5   4  797.42   28.30
  -3  -5   4  768.72   29.90
  -3  -5   4  784.92   31.30
   3  -5  -4  798.22   30.30
  -3   5  -4  801.62   32.80
   3   5   4  799.12   30.40
  -3   6   4   76.19    7.90
   3   6  -4   78.19    8.20
   3  -6   4   85.19    7.10
  -3  -6  -4   80.39    6.40
   3   6   4   83.39    7.20
  -3   6  -4   75.09    9.20
  -3  -6   4   89.29    8.60
   3   6   4   80.69    8.20
   3  -6  -4   94.09    6.70
   3  -6  -4   89.79    8.00
  -3   6  -4   69.99    7.20
  -3  -6   4   88.99    5.50
   3  -7   4   38.70    5.60
   3   7  -4   34.70    6.50
  -3   7   4   50.09    7.20
  -3  -7  -4   39.10    5.20
   3  -7   4   42.30    7.20
   3   7   4   41.00    5.90
   3  -7  -4   53.89    6.80
   3   7   4   52.29    7.20
   3  -7  -4   38.60    5.10
  -3   7  -4   52.79    6.80
  -3  -7   4   46.90    7.30
  -3  -8  -4    5.70    3.60
  -3   8   4    7.90    4.80
   3   8  -4    4.30    4.30
   3  -8   4   10.20    5.10
  -3   8  -4   10.70    4.20
  -3  -8   4    3.90    4.90
   3   8   4    8.40    4.70
   3  -8  -4    6.90    4.80
   3  -8  -4   11.70    4.00
   3   0   5   87.89    5.60
  -3   0   5   89.39    4.30
   3   0   5   81.89    4.20
  -3   0   5   80.19    4.10
   3   0   5   87.89    4.50
  -3   0  -5   90.69    4.40
  -3   0   5   82.49    5.40
  -3   0  -5   82.79    4.70
   3   0  -5   78.69    4.90
  -3  -1  -5 2613.64   93.69
   3  -1   5 2631.24   94.79
  -3  -1  -5 2585.84   93.09
   3   1  -5 2840.82   94.79
   3  -1   5 2719.33   93.19
  -3   1   5 2708.73   95.29
  -3  -1   5 2907.11   94.49
  -3  -1   5 2808.22   94.19
   3   1   5 2953.70   93.09
   3  -1  -5 2861.01   94.09
  -3  -1   5 2819.72   94.79
  -3   1  -5 2889.81   94.99
  -3   1  -5 2824.42   93.69
   3   1   5 2692.03   95.09
   3  -2   5  661.93   24.50
  -3  -2  -5  684.43   25.60
  -3  -2  -5  651.73   24.10
   3   2  -5  676.33   26.10
  -3   2   5  679.63   26.90
   3  -2   5  681.23   26.10
   3  -2  -5  727.63   25.60
   3   2   5  709.63   26.50
  -3  -2   5  699.73   25.60
  -3  -2   5  710.23   26.20
  -3   2  -5  721.23   25.20
   3   2   5  734.93   24.60
  -3   2  -5  722.93   27.00
  -3  -3  -5  558.44   21.00
   3   3  -5  528.85   23.20
   3  -3   5  570.54   23.10
  -3   3   5  551.94   23.90
  -3  -3  -5  571.74   23.00
   3  -3  -5  620.54   20.90
  -3   3  -5  613.84   22.50
   3   3   5  599.54   23.60
  -3  -3   5  624.64   23.90
   3  -3  -5  617.14   22.80
  -3   3  -5  645.44   24.90
  -3  -3   5  602.34   22.30
   3  -3  -5  623.94   20.50
   3   3   5  628.74   22.00
   3  -4   5  126.69    7.80
   3   4  -5  122.49    8.30
  -3  -4  -5  127.79    6.20
  -3   4   5  124.59    8.80
   3  -4  -5  129.49    6.30
  -3   4  -5  118.29    7.30
   3  -4  -5  126.29    7.70
   3   4   5  117.99    8.10
  -3   4  -5  124.19    9.30
   3  -4  -5  126.89    5.80
  -3  -4   5  133.59    8.80
  -3  -4   5  130.99    6.70
  -3  -5  -5 1379.36   47.50
  -3   5   5 1328.97   50.89
   3   5  -5 1345.97   50.49
   3  -5   5 1342.07   49.30
  -3  -5   5 1367.46   50.89
   3  -5  -5 1391.66   47.40
  -3   5  -5 1354.86   52.29
   3  -5  -5 1346.07   49.30
  -3   5  -5 1364.76   49.40
   3   5   5 1364.86   49.99
  -3  -5   5 1335.47   47.60
   3   5   5 1341.87   50.09
  -3  -6  -5   14.30    3.20
  -3   6   5   13.80    4.60
   3   6  -5   12.00    4.20
   3  -6   5   15.50    3.90
  -3  -6   5   17.70    5.20
  -3   6  -5   13.90    4.10
  -3   6  -5   17.60    5.50
   3  -6  -5   18.90    3.30
   3  -6  -5   13.50    4.30
   3   6   5   19.50    4.70
   3   6   5   11.20    4.00
  -3  -6   5   14.70    2.90
  -3   7   5   78.29    9.10
   3  -7   5   86.49   10.10
   3  -7   5   65.29    7.10
  -3  -7  -5   70.69    6.30
   3   7  -5   69.99    8.50
   3  -7  -5   73.49    6.30
   3  -7  -5   59.99    7.30
  -3   7  -5   64.99    7.50
   3   7   5   58.39    7.40
  -3  -7   5   63.19    8.30
   3   8  -5    7.20    4.70
  -3   8   5   10.30    5.30
   3  -8   5    3.50    4.70
  -3  -8  -5    5.20    3.40
  -3  -8   5    1.50    4.70
   3  -8  -5    3.80    4.30
  -3   8  -5    5.00    4.00
  -3   0  -6 1952.70   63.39
  -3   0   6 1835.32   62.99
   3   0   6 1871.91   63.29
  -3   0   6 1803.02   64.99
   3   0   6 1872.81   65.29
  -3   0   6 1833.42   62.99
  -3   0  -6 1851.41   63.89
   3   0  -6 1827.42   64.19
  -3  -1  -6  795.62   28.90
  -3  -1  -6  826.72   28.50
   3  -1   6  798.52   30.30
   3   1  -6  826.52   30.10
   3  -1   6  832.02   29.20
  -3   1   6  816.92   30.90
  -3  -1   6  813.62   30.20
  -3  -1   6  744.93   29.40
   3   1   6  811.42   28.10
   3   1   6  814.02   30.70
   3  -1  -6  803.22   29.30
  -3   1  -6  829.02   30.20
   3   2  -6  550.14   22.00
  -3  -2  -6  527.65   19.70
  -3   2   6  567.64   23.00
  -3  -2  -6  548.55   21.10
   3  -2   6  538.15   21.90
   3  -2  -6  560.24   21.20
   3   2   6  578.54   20.00
  -3   2  -6  558.94   22.70
   3   2   6  567.94   22.60
  -3   2  -6  586.64   21.10
  -3  -2   6  548.55   21.80
  -3  -2   6  567.84   21.70
   3   3  -6   17.40    3.50
  -3  -3  -6   11.80    3.10
  -3  -3  -6   11.90    1.70
   3  -3   6   12.80    3.00
  -3   3   6   12.60    3.80
  -3  -3   6   11.20    3.30
  -3   3  -6   15.60    2.70
  -3   3  -6   12.40    3.60
   3   3   6    9.90    3.10
   3   3   6   10.90    2.10
   3  -3  -6   14.00    3.10
  -3  -3   6   13.20    2.80
   3   4  -6   39.60    5.20
   3  -4   6   35.00    4.50
  -3   4   6   33.00    5.40
  -3  -4  -6   41.70    5.10
   3  -4  -6   22.80    2.40
  -3   4  -6   22.70    3.70
   3  -4  -6   21.80    3.90
  -3   4  -6   22.70    5.00
   3  -4  -6   21.40    2.00
   3   4   6   24.70    4.40
  -3  -4   6   22.50    4.50
  -3  -4   6   23.40    3.30
   3  -5   6   14.80    3.70
  -3   5   6   16.80    5.00
  -3  -5  -6   11.70    4.20
  -3  -5  -6   21.10    2.90
   3   5  -6   23.60    4.90
  -3  -5   6   13.80    2.90
   3  -5  -6   17.00    2.40
   3  -5  -6   15.80    4.20
  -3   5  -6   17.00    3.80
  -3   5  -6   15.80    5.20
  -3  -5   6   17.50    4.60
   3   5   6   19.90    4.50
   3  -6   6  103.89    8.10
  -3   6   6   97.99    9.50
   3   6  -6   94.79    8.80
  -3  -6  -6  102.89    9.30
  -3  -6  -6  103.39    6.40
   3   6   6   86.79    8.60
  -3  -6   6   95.29    9.20
  -3   6  -6   97.59    8.20
  -3   6  -6   86.59   10.40
  -3  -6   6   99.19    6.60
   3  -6  -6  100.79    6.10
   3  -6  -6  106.69    8.60
  -3  -7  -6    8.00    4.90
  -3  -7  -6   14.30    3.60
   3  -7   6   15.80    4.30
   3  -7   6   14.20    5.70
  -3   7   6   16.20    5.70
   3   7  -6   14.80    5.30
   3  -7  -6    6.70    4.60
  -3  -7   6   18.50    5.70
   3   7   6   17.10    5.10
  -3   7  -6    9.20    4.20
  -3   0  -7  266.97   10.90
  -3   0   7  260.67   10.20
  -3   0  -7  264.77   11.30
   3   0  -7  261.87   11.70
  -3   0   7  248.38   10.40
   3   0   7  262.17   12.60
  -3   0   7  251.57   12.50
   3   1  -7   91.59    6.60
  -3   1   7  100.69    7.30
  -3  -1  -7   97.39    5.80
  -3  -1  -7  109.79    5.60
   3  -1   7  105.69    7.20
   3  -1  -7  119.59    6.50
  -3   1  -7   98.09    5.90
  -3  -1   7  101.09    6.80
  -3   1  -7  116.89    7.20
   3   1   7  104.09    4.90
   3   1   7  107.09    7.50
  -3  -2  -7  578.44   22.90
  -3  -2  -7  565.84   21.60
  -3   2   7  556.34   24.80
   3   2  -7  611.14   24.10
   3  -2   7  574.94   24.10
  -3   2  -7  677.13   23.40
   3  -2  -7  621.04   23.30
   3   2   7  632.14   21.70
  -3   2  -7  631.04   24.80
   3   2   7  608.24   24.80
  -3  -2   7  628.84   24.00
  -3   3   7  173.68   10.80
   3   3  -7  189.18   10.30
   3  -3   7  183.98   10.10
  -3  -3  -7  186.58    7.40
  -3  -3  -7  183.28    9.80
   3   3   7  180.28   10.70
   3   3   7  176.48    8.00
  -3  -3   7  178.08    9.50
   3  -3  -7  167.58    9.30
  -3   3  -7  173.88   10.90
  -3  -3   7  168.18   10.20
  -3   3  -7  180.18    9.20
  -3  -4  -7  213.78    9.10
  -3  -4  -7  205.88   11.70
   3   4  -7  215.68   12.40
   3  -4   7  219.18   11.90
  -3   4   7  208.38   12.80
  -3  -4   7  249.08   11.40
   3  -4  -7  244.58   11.80
  -3  -4   7  232.38   12.80
   3   4   7  246.98   13.20
  -3   4  -7  236.98   11.60
  -3   4  -7  248.18   14.20
  -3   5   7   24.00    5.90
   3  -5   7   28.90    4.80
  -3  -5  -7   16.60    4.90
  -3  -5  -7   27.40    3.00
   3   5  -7   25.60    5.00
   3   5   7   25.00    5.30
  -3   5  -7   28.60    4.70
  -3  -5   7   26.70    4.00
   3  -5  -7   21.10    4.50
  -3   5  -7   17.60    5.40
   3  -5  -7   26.10    2.40
  -3  -5   7   26.60    5.40
  -3  -6  -7   97.89    5.90
   3   6  -7   96.09    9.20
   3  -6   7   99.39    8.00
  -3   6   7   87.79    9.90
  -3  -6  -7   92.39    9.10
  -3   6  -7   73.49    9.60
   3   6   7   82.09    8.70
  -3  -6   7   85.19    6.60
  -3   6  -7   92.99    8.20
   3  -6  -7   97.39    8.60
  -3  -6   7  100.99   10.60
  -3  -7  -7    1.20    4.20
  -3   7   7    0.50    4.60
   3   7  -7    4.10    4.20
   3  -7   7    1.30    4.70
   3  -7   7    1.20    3.10
  -3   7  -7    0.20    3.40
   3  -7  -7   -3.80    3.70
  -3  -7   7    0.30    4.40
   3   7   7    0.10    3.80
  -3   0   8    7.40    1.90
  -3   0   8    6.50    1.50
   3   0  -8    9.30    2.70
   3   0   8    6.80    2.80
  -3   0   8   13.50    3.50
  -3   0  -8    6.50    2.30
  -3   0  -8    6.10    2.50
  -3   1   8  809.72   31.90
   3  -1   8  807.82   31.40
  -3   1   8  752.72   27.00
  -3  -1  -8  800.92   29.00
  -3  -1  -8  803.92   29.30
   3   1  -8  693.43   30.20
  -3   1   8  812.32   27.40
  -3   1  -8  812.02   29.60
   3  -1  -8  843.42   30.00
   3   1   8  815.42   31.60
  -3  -1   8  810.62   31.20
  -3   1  -8  845.92   30.80
  -3  -2  -8  200.38    9.90
   3  -2   8  207.68   11.20
   3   2  -8  212.28   11.10
  -3  -2  -8  218.78    8.80
  -3   2   8  204.38   12.00
   3  -2  -8  198.98   10.10
  -3   2  -8  203.78   10.10
   3   2   8  194.68    8.30
  -3   2  -8  199.48   11.40
   3   2   8  197.28   11.60
  -3  -2   8  196.98   10.50
  -3  -2   8  195.68   10.70
   3   3  -8  356.36   16.30
  -3   3   8  338.57   17.30
   3  -3   8  339.27   15.90
  -3  -3  -8  331.97   15.10
  -3  -3  -8  321.27   12.70
  -3   3  -8  342.77   17.10
   3   3   8  331.97   14.40
   3  -3  -8  312.77   14.70
  -3  -3   8  340.07   15.90
  -3  -3   8  340.57   15.50
   3   3   8  342.97   16.90
  -3   3  -8  347.27   15.00
  -3  -4  -8   17.30    2.30
   3   4  -8   21.40    4.60
  -3  -4  -8   15.90    4.30
   3  -4   8   20.60    4.30
  -3   4   8   10.80    4.50
  -3  -4   8   25.10    5.20
  -3  -4   8   18.40    3.80
   3  -4  -8   22.10    4.20
  -3   4  -8   20.10    5.40
   3   4   8   21.50    5.20
  -3   4  -8   18.80    3.90
  -3  -5  -8   91.59    5.10
  -3   5   8  101.59    9.90
   3   5  -8   82.29    8.40
   3  -5   8   89.19    7.60
  -3  -5  -8   95.59    8.50
  -3  -5   8   86.69    8.90
  -3  -5   8   84.99    6.90
   3  -5  -8   95.59    8.00
  -3   5  -8   76.89    9.30
  -3   5  -8   83.49    7.40
   3   5   8   84.29    8.80
  -3  -6  -8   13.20    5.00
   3   6  -8   17.00    5.40
   3  -6   8   10.10    3.90
  -3   6   8   14.70    5.60
   3   6   8   17.00    5.30
  -3   6  -8   12.40    4.40
  -3   6  -8   14.20    6.10
  -3  -6   8   14.00    5.70
   3  -6  -8   11.50    4.50
   3  -7   8  167.08   11.50
  -3  -7  -8  153.98   12.00
  -3   7   8  169.58   13.70
   3   7  -8  144.89   12.50
   3  -7   8  173.08   14.10
   3   7   8  159.48   12.80
   3  -7  -8  150.68   11.60
  -3  -7   8  145.39   12.90
  -3   0   9   60.59    4.20
   3   0   9   48.60    6.10
  -3   0   9   50.99    3.50
  -3   0  -9   53.49    4.80
   3   0  -9   60.09    5.60
  -3   0  -9   47.80    4.90
  -3   0   9   37.80    5.30
  -3   1   9  466.35   21.70
  -3  -1  -9  478.95   19.20
  -3   1   9  482.65   17.20
  -3  -1  -9  489.55   19.00
   3   1  -9  460.65   20.60
   3  -1   9  456.25   21.10
  -3   1   9  491.45   16.80
  -3  -1   9  510.25   21.50
  -3   1  -9  522.75   19.90
   3  -1  -9  493.35   20.00
  -3   1  -9  484.35   20.50
   3   1   9  488.45   21.80
  -3  -1   9  505.15   19.50
   3  -2   9    6.10    3.30
  -3  -2  -9    9.30    2.90
  -3   2   9    7.30    4.20
  -3  -2  -9    8.90    2.10
   3   2  -9    4.00    2.80
  -3   2  -9    0.80    3.00
  -3   2  -9    6.80    2.70
  -3  -2   9    7.70    3.10
  -3  -2   9    2.80    2.80
   3  -2  -9    8.20    3.00
   3   2   9    6.20    3.60
  -3   3   9  264.77   15.40
   3  -3   9  260.77   13.80
  -3  -3  -9  264.27   10.60
  -3  -3  -9  264.57   12.80
   3   3  -9  280.47   14.40
  -3   3  -9  266.37   15.10
  -3  -3   9  260.77   13.80
   3  -3  -9  240.28   12.70
  -3  -3   9  252.67   13.30
   3   3   9  267.47   15.10
  -3   3  -9  262.87   12.90
  -3   4   9   17.00    5.50
   3  -4   9    9.80    3.80
  -3  -4  -9    9.90    3.00
  -3  -4  -9   12.40    4.20
   3   4  -9   13.40    4.40
   3   4   9   17.20    5.30
   3  -4  -9   14.90    4.30
  -3   4  -9   10.00    4.90
  -3   4  -9   10.30    3.60
  -3  -4   9   15.10    4.60
  -3  -4   9   15.70    3.90
   3   5  -9   87.49    9.50
  -3  -5  -9   93.09    9.10
  -3   5   9   82.59    9.70
   3  -5   9   81.29    7.90
  -3   5  -9   94.19   10.60
  -3  -5   9   99.29    9.90
  -3  -5   9   75.69    7.00
  -3   5  -9   83.39    7.80
   3  -5  -9   81.39    8.00
   3   5   9   84.49    9.70
   3   6  -9   12.90    5.00
  -3  -6  -9    7.50    4.60
   3  -6   9    5.70    3.80
  -3   6   9   12.10    5.60
   3   6   9    9.20    5.00
   3  -6  -9    5.40    4.50
  -3   6  -9    5.70    5.00
  -3  -6   9    9.90    5.20
   3   0 -10  312.47   14.90
  -3   0 -10  303.07   14.10
  -3   0 -10  314.67   13.90
   3   0  10  313.07   16.00
  -3   0  10  268.27   15.40
  -3   0  10  322.47   12.80
  -3  -1 -10  183.28    9.70
  -3   1  10  189.88   12.10
   3  -1  10  184.28   11.70
   3   1 -10  185.18   10.90
  -3  -1 -10  192.08    9.40
   3  -1 -10  182.98   10.30
   3   1  10  176.78   11.90
  -3  -1  10  181.38    9.60
  -3   1 -10  175.28   10.80
  -3   1 -10  197.78   10.30
  -3  -1  10  192.08   11.70
  -3  -2 -10  166.58    9.40
   3  -2  10  165.08   10.90
   3   2 -10  124.29    9.60
  -3  -2 -10  160.88    7.90
  -3   2  10  164.38   11.80
  -3  -2  10  158.78   10.50
   3   2  10  170.58   11.60
  -3   2 -10  138.49    9.10
   3  -2 -10  159.68    9.50
  -3   2 -10  170.08   11.00
  -3  -2  10  165.78    9.70
  -3  -3 -10  251.67   12.70
  -3   3  10  244.58   15.40
   3  -3  10  228.88   13.60
   3   3 -10  241.68   14.00
  -3   3 -10  244.38   12.80
   3   3  10  220.78   14.60
  -3   3 -10  238.38   14.70
   3  -3 -10  236.38   12.60
  -3  -3  10  226.08   13.20
  -3  -3  10  256.67   13.60
  -3   4  10   39.60    7.20
   3  -4  10   38.10    6.10
  -3  -4 -10   37.20    5.40
   3   4 -10   38.10    6.50
   3  -4 -10   32.40    5.50
  -3   4 -10   28.10    6.30
  -3   4 -10   31.70    5.30
  -3  -4  10   33.30    6.00
  -3  -4  10   34.00    5.30
   3   4  10   41.60    7.30
   3  -5  10   15.90    4.60
  -3   5  10   13.70    5.80
  -3  -5 -10   17.00    4.80
   3   5 -10   17.40    5.30
  -3  -5  10   11.90    5.00
  -3  -5  10   19.90    4.40
   3  -5 -10   17.70    4.80
  -3   5 -10   16.60    6.10
   3   5  10   26.90    6.70
  -3   5 -10   16.70    4.50
   3  -6  10   55.89    7.60
  -3  -6 -10   54.99    7.70
  -3   6  10   43.60    8.70
   3   6 -10   62.79    9.00
   3  -6 -10   40.30    6.70
   3   6  10   60.89    9.20
  -3  -6  10   50.09    8.20
  -3   0  11  200.68   13.00
  -3   0 -11  184.28   10.40
   3   0  11  189.58   12.40
  -3   0 -11  189.98   10.60
  -3   0  11  200.38   11.50
   3   0 -11  200.18   11.70
   3   1 -11   42.00    6.00
  -3  -1 -11   40.30    4.60
   3  -1  11   31.80    5.70
  -3  -1 -11   42.10    5.10
  -3   1  11   39.70    7.00
  -3  -1  11   40.80    4.80
  -3   1 -11   43.50    5.40
   3  -1 -11   39.30    5.40
  -3  -1  11   43.10    6.90
   3   1  11   38.80    6.60
  -3   1 -11   44.10    5.90
   3  -2  11    4.40    3.80
   3   2 -11    4.90    3.50
  -3  -2 -11   -1.30    2.90
  -3   2  11   -0.20    3.90
   3  -2 -11    3.80    3.50
   3   2  11   -5.70    3.40
  -3  -2  11    2.20    3.20
  -3  -2  11    0.90    3.80
  -3   2 -11   -2.40    3.30
  -3   2 -11    6.40    3.20
   3  -3  11   55.49    7.40
   3   3 -11   52.69    7.10
  -3  -3 -11   45.60    6.00
  -3   3  11   60.19    8.90
  -3  -3  11   52.19    7.00
  -3   3 -11   55.99    6.60
  -3   3 -11   58.09    7.80
  -3  -3  11   52.49    6.60
   3  -3 -11   46.80    6.10
   3   3  11   56.09    8.30
   3   4 -11  107.39   10.00
   3  -4  11  112.59    9.90
  -3  -4 -11  115.69    9.20
  -3   4  11  116.49   11.80
   3   4  11  115.99   11.10
  -3   4 -11   94.89    8.60
   3  -4 -11  112.29    9.60
  -3   4 -11  115.49   11.20
  -3  -4  11  106.99    9.20
  -3  -4  11  121.19   10.20
   3  -5  11   20.40    5.50
   3   5 -11    5.70    4.90
  -3  -5 -11   15.50    5.10
  -3   5  11   14.70    6.50
   3  -5 -11   17.40    5.40
   3   5  11   16.10    5.90
  -3  -5  11   22.40    6.10
  -3   5 -11   16.90    6.70
  -3  -5  11   13.10    4.50
   3   0  12  256.37   15.70
   3   0 -12  277.27   14.30
  -3   0 -12  258.87   13.30
  -3   0 -12  253.27   13.30
  -3   0  12  228.78   15.30
  -3  -1 -12  199.68   11.10
   3  -1  12  180.88   12.90
  -3   1  12  189.68   13.80
   3   1 -12  204.98   12.30
  -3   1 -12  198.08   12.10
  -3   1 -12  199.28   11.50
   3   1  12  184.08   13.00
  -3  -1  12  203.18   13.40
   3  -1 -12  192.38   11.70
   3   2 -12   59.49    7.60
  -3  -2 -12   73.99    7.10
  -3   2  12   62.39    9.10
   3  -2  12   55.09    8.00
  -3  -2  12   55.59    6.40
   3  -2 -12   48.40    6.30
  -3   2 -12   47.90    6.20
  -3   2 -12   48.30    6.90
   3   2  12   49.80    7.90
  -3  -2  12   47.10    7.10
  -3  -3 -12   54.09    6.40
   3  -3  12   46.50    7.10
  -3   3  12   43.10    7.70
   3   3 -12   32.40    6.50
  -3  -3  12   51.89    7.30
  -3   3 -12   50.79    7.80
   3   3  12   57.89    8.80
  -3   3 -12   46.40    6.60
  -3  -3  12   53.49    6.90
   3  -3 -12   52.59    6.60
  -3   4  12   21.00    6.90
   3  -4  12   31.00    6.30
  -3  -4 -12   15.10    5.00
   3   4 -12   24.10    6.00
  -3  -4  12   26.70    5.60
   3   4  12   31.30    7.10
  -3   4 -12   22.90    6.50
  -3  -4  12   31.50    6.40
   3  -4 -12   27.30    5.70
  -3   0  13   35.90    7.00
  -3   0 -13   41.70    5.70
   3   0  13   39.90    7.50
   3   0 -13   35.80    6.20
   3   1 -13  142.99   10.50
  -3  -1 -13  118.09    8.90
  -3   1  13  110.89   11.70
   3  -1  13  118.29   10.80
  -3   1 -13  129.89   12.30
   3   1  13  151.78   12.30
   3  -1 -13  135.59   10.10
  -3   1 -13  137.49    9.80
  -3  -1  13  125.09   11.50
   3  -2  13   15.20    5.50
   3   2 -13   13.10    4.60
  -3   2  13   12.30    5.70
  -3  -2 -13    9.50    4.30
   3  -2 -13    7.30    4.20
  -3   2 -13   12.90    5.00
  -3   2 -13   15.50    4.30
   3   2  13   21.10    6.20
  -3  -2  13    9.50    5.20
   3  -3  13   69.89    9.30
   3   3 -13   65.49    8.90
  -3   3  13   62.69    9.60
  -3  -3 -13   81.79    8.40
   3  -3 -13   73.69    8.10
  -3  -3  13   77.79    9.40
   3   3  13   72.29   10.20
  -3  -3  13   74.39    8.20
  -3   3 -13   84.99   10.10
  -3   0 -14   36.30    5.90
  -3   0  14   36.90    7.80
   3   0  14   39.60    7.60
   3   0 -14   33.80    6.20
  -3  -1 -14   48.20    6.60
  -3   1  14   66.99    9.60
   3   1 -14   65.89    8.40
   3  -1  14   52.19    8.50
   3   1  14   65.49    9.80
   3  -1 -14   54.59    7.60
  -3   1 -14   59.09    7.30
  -3  -1  14   58.19    8.80
   4   0   0  896.51   30.60
   4   0   0  898.11   31.00
  -4   0   0  908.91   30.60
   4   0   0  914.01   31.10
  -4   0   0  927.11   30.50
   4   0   0  819.72   30.50
  -4  -1   0   68.99    3.00
   4  -1   0   81.49    3.10
  -4   1   0   74.79    3.70
  -4  -1   0   67.89    3.60
  -4   1   0   73.39    4.30
   4   1   0   74.09    3.00
   4  -1   0   82.79    3.60
   4   1   0   71.89    4.10
  -4  -1   0   78.99    4.10
  -4   1   0   75.89    3.20
   4   2   0 1463.35   50.79
   4  -2   0 1492.15   50.79
  -4  -2   0 1429.56   48.70
   4  -2   0 1494.85   49.90
  -4   2   0 1461.95   50.39
   4  -2   0 1441.26   50.19
  -4   2   0 1414.16   50.59
  -4   2   0 1421.96   49.60
   4   2   0 1465.95   48.80
  -4  -2   0 1438.46   50.09
   4   2   0 1499.55   50.29
   4   3   0 1502.75   53.99
  -4   3   0 1548.74   53.79
   4   3   0 1508.75   51.69
  -4  -3   0 1556.04   51.59
  -4   3   0 1518.45   52.89
   4  -3   0 1597.04   53.29
  -4   3   0 1470.05   53.69
  -4  -3   0 1537.85   53.29
  -4  -4   0  288.07   10.80
   4   4   0  287.37   13.50
  -4   4   0  281.17   12.30
   4   4   0  272.97   10.90
  -4  -4   0  277.67   12.60
  -4   4   0  282.77   13.00
  -4   4   0  292.37   13.40
   4  -5   0   12.80    3.30
  -4  -5   0    7.60    2.10
  -4   5   0    4.10    2.50
  -4  -5   0    2.90    2.60
  -4   5   0    4.40    3.20
   4   5   0    3.50    3.00
  -4  -5   0    7.40    1.70
  -4   6   0   69.49    6.70
   4   6   0   72.19    7.90
   4  -6   0   57.09    6.50
   4  -6   0   88.69    7.50
  -4  -6   0   87.39    5.40
  -4  -6   0   63.69    6.70
  -4  -7   0  157.08   10.60
   4   7   0  148.79   11.40
   4  -7   0  145.19   10.60
  -4   7   0  160.78   10.50
   4  -7   0  121.49    9.90
   4   8   0   28.20    6.70
  -4  -8   0   44.30    6.70
   4  -8   0   29.70    5.90
  -4   8   0   33.70    6.10
   4  -8   0   38.10    6.40
   4   0   1 2280.77   79.09
   4   0   1 2397.66   79.69
   4   0  -1 2442.96   79.49
   4   0  -1 2360.66   79.09
  -4   0  -1 2316.77   79.09
  -4   0   1 2277.77   79.59
   4   0  -1 2377.96   79.69
  -4   0   1 2476.45   79.39
  -4   0  -1 2437.06   79.79
  -4   0  -1 2366.96   79.19
  -4   0   1 2331.17   78.99
  -4  -1  -1 1684.43   55.59
   4   1  -1 1653.03   55.99
   4  -1   1 1663.63   54.89
   4   1  -1 1597.94   56.19
   4   1  -1 1674.63   55.09
   4  -1   1 1423.86   55.79
  -4   1   1 1613.24   55.49
   4  -1   1 1606.64   54.99
  -4   1   1 1714.53   55.59
   4  -1   1 1682.33   56.49
  -4  -1  -1 1636.84   55.49
  -4  -1  -1 1646.84   56.19
  -4   1   1 1633.04   56.49
   4   1   1 1671.03   55.69
  -4   1  -1 1626.44   56.09
  -4   1  -1 1730.33   56.59
   4  -1  -1 1728.13   55.39
  -4  -1   1 1659.33   55.19
   4   1   1 1604.54   56.09
   4   1   1 1692.43   55.59
  -4  -1   1 1643.54   55.89
   4  -1  -1 1665.43   55.49
   4  -2   1  278.57   11.70
   4  -2   1  324.87   12.10
   4   2  -1  306.17   11.90
  -4   2   1  306.47   11.30
  -4  -2  -1  311.57   10.50
  -4  -2  -1  298.77   11.00
   4  -2   1  314.77   10.80
  -4   2   1  296.97   12.00
   4   2   1  277.37   11.20
   4   2   1  262.07   11.70
   4  -2  -1  261.97   10.70
   4  -2  -1  267.07   10.90
  -4   2  -1  263.47   10.60
   4  -2  -1  275.57   11.80
  -4   2  -1  270.27   11.70
   4   2   1  267.37   10.40
  -4  -2   1  265.37   11.30
   4  -2  -1  269.07   11.00
   4  -3   1  826.42   28.60
  -4  -3  -1  818.32   28.60
  -4   3   1  772.82   29.40
  -4  -3  -1  832.72   27.70
  -4   3   1  786.12   28.50
   4   3  -1  803.22   29.60
  -4   3   1  798.02   28.90
   4  -3   1  855.71   29.50
   4  -3  -1  775.42   28.70
  -4  -3   1  775.82   26.90
  -4  -3   1  828.12   27.00
   4   3   1  753.62   29.40
  -4   3  -1  766.12   28.30
   4   3   1  775.62   27.70
  -4  -3   1  744.23   28.90
  -4   3  -1  756.22   29.50
  -4   4   1  104.09    6.80
   4   4  -1   98.59    7.20
  -4  -4  -1  107.19    6.30
  -4   4   1  103.89    7.00
  -4  -4  -1  113.49    5.20
   4  -4   1  106.09    6.80
  -4   4   1  110.89    6.50
  -4  -4   1   89.09    4.60
   4   4   1   98.69    5.30
  -4  -4   1   94.19    4.60
  -4   4  -1   99.99    7.20
   4   4   1   92.99    7.10
  -4  -4   1   94.49    6.70
  -4   4  -1   95.89    6.10
  -4  -5  -1  202.78    8.80
  -4  -5  -1  185.08   10.20
   4  -5   1  195.18   10.60
   4   5  -1  206.48   11.50
  -4   5   1  179.78   10.80
  -4   5   1  206.98   10.60
  -4   5  -1  211.58   10.50
  -4  -5   1  210.38   11.00
  -4  -5   1  198.38    8.50
   4   5   1  211.28   11.70
  -4   5  -1  210.68   11.90
   4   5   1  196.58    9.20
  -4  -5   1  200.08    8.40
  -4  -6  -1   81.99    7.10
   4  -6   1   74.29    7.10
  -4   6   1   82.29    7.00
   4   6  -1   90.89    8.10
  -4   6   1   76.39    7.40
   4   6   1   73.59    5.60
  -4  -6   1   85.89    7.60
   4   6   1   86.29    8.20
  -4   6  -1   95.09    7.30
   4  -6  -1   85.39    7.00
  -4  -7  -1   -2.90    3.10
  -4   7   1    2.00    3.20
   4   7  -1    0.00    3.60
   4  -7   1    2.40    3.40
  -4  -7  -1   -1.60    2.10
   4  -7   1   -0.30    3.30
  -4  -7   1   -2.40    3.60
   4  -7  -1   -0.70    3.20
   4   7   1    7.70    4.50
   4  -7  -1    2.40    3.60
  -4   7  -1    0.00    3.10
  -4  -8  -1   98.99    9.50
  -4   8   1   95.39    9.40
   4   8  -1  108.99   10.60
   4  -8   1  105.59    9.20
   4  -8   1   93.39    9.70
  -4   8  -1  115.19    9.60
   4  -8  -1  100.19    9.20
  -4  -8   1   89.89    9.40
   4  -8  -1  105.09    9.80
   4   8   1  109.39   10.70
  -4   0  -2 2397.86   83.79
   4   0  -2 2483.25   84.19
   4   0   2 2574.44   83.79
   4   0   2 2485.95   84.29
  -4   0   2 2426.26   83.39
  -4   0   2 2392.96   84.29
   4   0  -2 2589.14   84.19
  -4   0   2 2644.24   84.09
  -4   0  -2 2457.55   83.59
  -4   0  -2 2503.75   84.49
   4   0  -2 2521.55   83.59
  -4  -1  -2 1389.56   49.80
   4   1  -2 1374.26   49.80
   4   1  -2 1337.77   49.99
  -4  -1  -2 1375.36   49.99
  -4   1   2 1416.96   49.60
  -4   1   2 1339.77   50.29
   4  -1   2 1259.77   49.80
  -4   1   2 1355.76   49.00
   4   1  -2 1457.45   49.40
   4  -1   2 1419.76   50.39
  -4  -1  -2 1365.96   49.20
  -4   1  -2 1515.75   50.49
  -4   1  -2 1514.35   48.80
   4   1   2 1586.54   49.40
   4  -1  -2 1592.04   49.70
   4   1   2 1543.95   50.09
  -4   1  -2 1572.34   50.39
  -4  -1   2 1556.54   49.90
  -4  -1   2 1565.74   49.50
   4   1   2 1542.05   49.90
   4  -1  -2 1598.44   48.80
   4   2  -2  581.44   21.50
  -4   2   2  559.74   21.70
  -4  -2  -2  569.64   20.60
   4  -2   2  566.54   20.10
  -4  -2  -2  554.74   20.30
   4   2  -2  538.55   21.40
   4   2  -2  575.24   19.80
   4  -2   2  550.14   21.30
  -4   2   2  564.64   20.40
  -4   2  -2  564.34   20.20
   4  -2  -2  574.44   20.60
   4  -2  -2  598.54   21.80
  -4  -2   2  553.04   21.10
   4  -2  -2  589.14   21.00
  -4  -2   2  578.74   19.80
  -4   2  -2  563.24   21.70
  -4   2  -2  605.94   21.80
   4  -2  -2  586.84   20.20
   4   2   2  587.54   20.60
   4   2   2  570.74   21.50
   4   2   2  585.74   20.70
  -4  -2   2  589.64   21.60
  -4   3   2 4807.32  162.48
   4   3  -2 4802.22  162.38
   4  -3   2 4736.63  161.98
  -4   3   2 4829.32  161.28
  -4  -3  -2 4692.13  160.88
  -4  -3  -2 4890.51  160.88
   4  -3   2 4803.92  160.98
  -4  -3   2 4756.62  159.88
   4   3   2 4770.12  162.28
  -4   3  -2 4787.52  162.78
   4  -3  -2 4796.82  161.08
  -4  -3   2 4836.92  161.98
   4   3   2 4804.32  160.88
  -4   3  -2 4739.53  160.88
  -4  -3   2 4838.92  159.78
   4  -3  -2 4841.82  161.28
  -4  -4  -2   29.00    3.00
  -4   4   2   28.70    4.40
   4  -4   2   27.70    4.00
  -4  -4  -2   27.80    3.30
   4   4  -2   30.10    4.40
  -4  -4   2   28.20    2.40
   4   4   2   27.20    4.20
  -4  -4   2   24.60    2.20
  -4   4  -2   23.20    3.20
   4   4   2   22.10    3.00
  -4   4  -2   24.90    4.40
  -4  -4   2   23.20    3.60
   4  -5   2  527.75   21.80
  -4  -5  -2  527.85   21.00
   4   5  -2  527.65   22.60
  -4   5   2  538.85   22.40
  -4   5   2  534.65   21.30
  -4  -5   2  512.35   19.20
  -4  -5   2  530.45   19.10
  -4   5  -2  522.75   21.20
   4   5   2  535.05   22.60
  -4  -5   2  529.65   22.10
   4  -5  -2  515.45   20.90
   4   5   2  522.35   20.50
  -4   5  -2  499.25   22.80
  -4   6   2  131.29    8.90
  -4   6   2  116.99    9.20
   4  -6   2  134.59    9.10
  -4  -6  -2  128.69    8.70
   4   6  -2  123.39    9.70
  -4  -6   2  145.29   10.00
   4  -6  -2  139.09    8.70
  -4   6  -2  123.79   10.40
  -4  -6   2  137.99    6.60
  -4   6  -2  136.39    8.90
   4   6   2  140.99    8.10
   4   6   2  125.89    9.90
   4  -7   2  158.28   10.50
   4   7  -2  163.78   11.90
  -4   7   2  168.18   11.40
   4  -7   2  162.68   11.60
  -4  -7  -2  161.68   10.50
   4  -7  -2  159.78   10.20
  -4   7  -2  158.28   10.60
  -4  -7   2  153.48   11.10
   4   7   2  169.48   11.90
   4   7   2  156.78    9.90
   4  -8   2    4.30    3.60
   4   8  -2    2.00    4.50
   4  -8   2    3.70    4.30
  -4  -8  -2    2.70    3.80
  -4  -8   2    1.70    4.20
   4  -8  -2    2.00    3.80
  -4   8  -2    6.90    4.10
   4  -8  -2    4.30    3.60
   4   8   2   -3.60    4.00
  -4   0  -3  178.08    7.30
  -4   0   3  180.78    8.00
   4   0  -3  180.98    7.00
   4   0  -3  180.58    7.80
   4   0   3  190.98    7.20
  -4   0  -3  179.18    7.10
   4   0   3  186.98    8.00
  -4   0  -3  180.88    6.90
   4   0  -3  186.48    7.80
  -4   0   3  181.88    6.90
   4   1  -3 7079.79  233.18
  -4   1   3 6810.02  233.48
   4   1  -3 7097.19  232.68
   4  -1   3 7022.30  233.28
  -4   1   3 6838.32  232.68
  -4  -1  -3 7003.80  232.98
  -4  -1  -3 7059.09  233.08
   4  -1   3 7018.40  232.18
  -4  -1  -3 6754.82  232.18
  -4   1  -3 7099.29  232.78
   4  -1  -3 6773.92  232.58
  -4   1  -3 7071.49  233.28
   4   1   3 7166.78  232.08
   4   1   3 6857.91  233.08
  -4   1  -3 7032.90  233.48
  -4  -1   3 7000.50  232.58
  -4  -1   3 6920.01  232.88
   4   1   3 6829.02  232.68
  -4  -1   3 7029.70  232.68
  -4   2   3   50.59    2.80
   4  -2   3   56.39    2.90
   4   2  -3   57.39    4.20
  -4  -2  -3   45.90    2.80
   4  -2   3   53.89    4.20
  -4   2   3   55.59    4.60
   4   2  -3   55.49    3.00
  -4  -2  -3   53.79    3.60
  -4   2  -3   42.80    4.10
   4   2   3   36.00    3.70
  -4   2  -3   41.10    2.90
   4   2   3   44.00    3.50
   4  -2  -3   42.10    3.30
   4  -2  -3   46.10    2.40
  -4  -2   3   41.20    3.80
  -4  -2   3   43.40    2.90
   4   2   3   40.70    3.00
   4  -3   3 1547.05   52.19
   4   3  -3 1563.94   51.79
  -4  -3  -3 1507.85   51.99
   4   3  -3 1482.85   53.69
  -4   3   3 1509.85   54.09
  -4  -3  -3 1552.44   52.79
   4  -3   3 1515.95   53.39
  -4   3  -3 1531.85   54.49
  -4  -3   3 1504.45   51.49
   4   3   3 1518.65   52.79
   4  -3  -3 1485.55   52.59
   4  -3  -3 1493.25   51.99
   4   3   3 1508.35   53.59
  -4   3  -3 1482.85   52.29
  -4  -3   3 1529.05   53.59
  -4   4   3  868.71   33.10
   4  -4   3  847.52   32.10
   4   4  -3  834.02   32.80
  -4  -4  -3  848.52   31.00
   4   4   3  882.41   32.80
   4  -4  -3  869.91   31.70
  -4  -4   3  843.42   32.60
  -4  -4   3  868.81   30.00
  -4  -4   3  844.82   30.30
   4  -4  -3  878.11   31.00
   4   4   3  866.91   31.60
  -4   4  -3  849.61   31.50
  -4   4  -3  881.71   33.80
   4  -5   3  125.99    8.20
   4   5  -3  115.79    8.80
  -4  -5  -3  107.29    7.40
  -4   5   3  119.59    8.80
  -4  -5   3  131.99    6.10
   4   5   3  137.39    7.80
   4   5   3  136.89    9.20
  -4  -5   3  133.39    6.40
   4  -5  -3  125.29    8.20
  -4   5  -3  132.39   10.00
  -4   5  -3  138.29    8.10
  -4  -5   3  135.29    9.10
   4  -5  -3  141.49    7.60
  -4  -6  -3   57.69    5.70
   4   6  -3   66.19    7.50
  -4   6   3   54.09    6.90
   4  -6   3   61.69    6.30
   4   6   3   51.89    6.80
  -4   6  -3   57.89    6.30
   4   6   3   51.69    5.60
  -4  -6   3   52.89    3.90
   4  -6  -3   50.29    5.40
   4  -6  -3   52.19    6.20
  -4   6  -3   55.79    8.00
  -4  -6   3   57.39    7.50
   4   7  -3   51.69    7.40
   4  -7   3   57.79    7.90
  -4   7   3   63.19    7.80
  -4  -7  -3   53.79    6.20
   4  -7   3   54.69    6.60
   4   7   3   50.19    7.30
  -4   7  -3   51.79    6.40
   4   7   3   52.19    6.00
  -4  -7   3   51.69    7.70
   4  -7  -3   51.89    6.50
   4  -7  -3   46.80    5.80
  -4  -8  -3   17.00    4.60
   4   8  -3   23.50    6.30
   4  -8   3   19.70    4.80
  -4   8   3   21.90    5.70
   4  -8   3   19.00    5.80
  -4  -8   3   20.60    5.90
   4  -8  -3   18.40    5.20
   4  -8  -3   18.70    4.60
   4   8   3   24.80    6.20
  -4   8  -3   31.00    5.50
  -4   0  -4  306.77   11.30
  -4   0   4  299.97   12.60
   4   0   4  305.27   11.60
   4   0   4  315.37   11.60
  -4   0   4  315.37   11.50
  -4   0   4  306.77   11.20
  -4   0  -4  301.97   11.80
   4   0  -4  307.17   12.30
   4   0  -4  318.97   12.60
   4   0   4  301.37   12.60
   4   1  -4  548.75   19.90
   4   1  -4  544.85   19.60
  -4  -1  -4  504.55   18.50
  -4  -1  -4  524.75   19.60
  -4  -1  -4  534.15   19.10
  -4   1   4  523.95   20.30
   4  -1   4  494.15   20.10
   4  -1   4  540.35   18.30
   4  -1   4  530.45   20.00
  -4  -1   4  502.35   19.60
  -4   1  -4  521.95   19.90
   4   1   4  527.85   20.00
  -4  -1   4  495.65   19.40
   4  -1  -4  522.95   19.20
   4   1   4  536.75   18.50
  -4   1  -4  543.05   18.60
  -4  -1   4  502.75   19.20
  -4   2   4 1394.46   47.20
  -4  -2  -4 1374.96   44.60
   4   2  -4 1371.56   46.50
   4   2  -4 1400.96   45.50
   4  -2   4 1405.26   44.70
   4  -2   4 1378.86   46.50
   4  -2  -4 1251.97   45.50
  -4  -2   4 1250.57   46.10
  -4   2  -4 1217.38   44.90
   4   2   4 1245.68   46.20
  -4   2  -4 1240.18   46.80
   4   2   4 1281.37   44.90
   4   2   4 1298.67   46.10
  -4  -2   4 1241.38   45.30
  -4   3   4   12.50    3.10
  -4  -3  -4   12.90    2.00
   4  -3   4   10.20    2.60
   4   3  -4   14.50    3.00
   4   3  -4   13.30    2.10
   4  -3   4   15.10    2.10
   4   3   4   13.80    2.80
   4  -3  -4   11.10    1.60
   4  -3  -4   12.10    1.70
   4  -3  -4    6.90    2.20
  -4   3  -4    8.10    2.00
  -4  -3   4    7.30    2.70
   4   3   4   11.50    2.60
  -4   3  -4    6.90    3.00
  -4  -3   4    9.40    1.90
  -4  -4  -4  733.93   27.30
   4  -4   4  741.43   28.90
  -4   4   4  743.63   29.90
   4   4  -4  713.63   27.30
   4   4  -4  737.43   29.60
   4   4   4  778.12   28.80
  -4   4  -4  763.62   28.20
   4   4   4  800.52   29.70
   4  -4  -4  786.72   27.60
   4  -4  -4  782.52   27.20
  -4  -4   4  757.72   29.60
  -4  -4   4  763.92   27.00
   4  -4  -4  755.32   28.50
  -4   4  -4  759.22   30.70
   4  -5   4  149.59    9.00
   4   5  -4  142.19    9.90
  -4  -5  -4  147.89    7.80
  -4   5   4  137.69    9.80
  -4   5  -4  152.98    8.80
  -4  -5   4  133.99    6.70
  -4  -5   4  139.19    7.20
   4   5   4  142.99    8.90
   4  -5  -4  132.69    8.80
  -4   5  -4  148.09   10.80
  -4  -5   4  137.39    9.40
   4   5   4  156.78   10.00
   4  -5  -4  145.99    7.70
  -4  -6  -4    5.10    2.90
   4  -6   4    1.60    2.90
  -4   6   4    6.00    3.90
   4   6  -4    1.80    3.60
  -4  -6   4    5.70    4.20
  -4   6  -4    2.40    3.00
   4   6   4    3.50    3.80
   4  -6  -4    8.00    3.00
  -4   6  -4    2.60    4.30
   4  -6  -4    9.40    3.60
   4   6   4    7.30    3.20
  -4  -6   4    6.10    1.90
  -4   7   4   23.60    5.70
  -4  -7  -4   22.80    4.30
   4  -7   4   24.40    4.80
   4   7  -4   22.60    5.70
  -4  -7   4   28.10    6.40
   4   7   4   21.00    4.60
   4  -7  -4   18.80    4.10
   4   7   4   22.40    5.40
   4  -7  -4   14.00    4.50
  -4   7  -4   19.20    4.70
   4  -8   4   25.90    6.60
  -4   8   4   29.40    6.70
  -4  -8  -4   22.10    4.60
   4   8  -4   16.00    5.80
  -4  -8   4   17.60    5.50
   4  -8  -4   22.50    5.40
   4  -8  -4   16.30    4.20
  -4   8  -4   20.30    5.30
   4   8   4   28.60    6.50
  -4   0   5   92.39    4.40
  -4   0   5   84.99    4.10
  -4   0  -5   83.79    4.30
  -4   0   5   90.39    5.80
  -4   0  -5   81.79    4.70
   4   0   5   84.19    4.40
   4   0   5   85.69    5.50
   4   0   5   88.79    4.60
   4   1  -5  240.88   11.30
   4  -1   5  243.88    9.90
   4  -1   5  240.28   11.50
  -4   1   5  231.88   11.80
  -4  -1  -5  237.58   10.40
  -4  -1  -5  240.98   10.00
   4  -1  -5  272.17   11.00
  -4   1  -5  291.57   11.80
  -4  -1   5  269.37   10.90
  -4  -1   5  272.37   11.20
   4   1   5  292.47   10.00
  -4  -1   5  273.07   11.40
   4   1   5  291.27   12.10
  -4   1  -5  271.67   10.30
   4  -2   5   78.19    5.70
   4   2  -5   82.69    6.00
  -4  -2  -5   84.99    4.40
  -4   2   5   82.49    6.60
   4   2  -5   73.79    5.50
  -4  -2  -5   86.39    5.70
   4  -2   5   82.69    4.40
   4  -2  -5  118.69    5.90
   4   2   5  115.59    4.90
  -4  -2   5  116.09    6.40
  -4  -2   5  106.19    5.70
  -4   2  -5  112.79    5.30
  -4   2  -5  114.29    7.10
   4   2   5  118.29    6.80
  -4   3   5  294.27   14.10
   4  -3   5  288.27   13.10
   4   3  -5  306.27   12.30
   4   3  -5  283.67   13.50
  -4  -3  -5  282.67   11.10
   4  -3   5  281.17   11.60
   4  -3  -5  293.37   10.50
   4  -3  -5  295.07   12.60
  -4  -3   5  297.37   13.60
  -4   3  -5  296.37   14.50
   4  -3  -5  297.37   10.40
  -4   3  -5  293.67   12.20
   4   3   5  305.47   13.50
  -4  -3   5  279.87   12.00
  -4   4   5  108.39    8.60
   4  -4   5  105.09    7.50
   4   4  -5  117.19    7.40
  -4  -4  -5  123.79    6.20
   4   4  -5  109.09    8.10
   4  -4  -5  133.19    6.20
   4  -4  -5  121.09    7.60
  -4   4  -5  148.99    9.90
   4   4   5  132.49    8.20
  -4  -4   5  129.79    8.80
   4  -4  -5  137.39    5.90
   4   4   5  136.79    8.40
  -4  -4   5  131.19    6.60
  -4   4  -5  133.79    7.40
   4  -5   5  469.15   20.10
  -4  -5  -5  475.75   18.20
   4   5  -5  437.66   20.70
  -4   5   5  465.25   21.40
   4   5   5  465.35   20.20
  -4   5  -5  458.95   22.30
  -4  -5   5  469.45   21.20
   4   5   5  459.95   20.60
   4  -5  -5  466.05   17.90
  -4   5  -5  464.25   19.50
   4  -5  -5  480.75   19.80
  -4  -5   5  462.75   18.00
   4   6  -5   83.99    8.90
  -4   6   5   88.89    8.80
   4  -6   5   91.89    7.70
  -4  -6  -5   79.49    6.40
  -4  -6   5   82.49    5.50
   4   6   5   89.79    7.70
  -4   6  -5   72.79    9.20
  -4  -6   5   85.79    9.00
   4  -6  -5   85.89    6.00
  -4   6  -5   96.79    7.70
   4   6   5   87.29    8.60
   4  -6  -5   95.89    8.10
  -4   7   5   15.50    5.30
   4  -7   5   15.20    4.20
   4   7  -5   11.50    4.80
  -4  -7  -5   13.10    3.70
   4  -7  -5   19.10    5.10
   4   7   5   19.90    4.80
   4   7   5   23.50    5.70
   4  -7  -5   20.40    3.80
  -4   7  -5   24.70    5.00
  -4  -7   5   17.90    5.80
   4  -8   5   21.70    6.70
   4   8  -5   31.30    6.90
  -4   8   5   36.50    7.30
  -4  -8  -5   27.20    4.80
  -4   8  -5   27.00    5.90
  -4  -8   5   25.20    6.60
   4  -8  -5   25.30    5.90
   4   0  -6  139.19    7.60
  -4   0   6  146.19    6.40
  -4   0  -6  141.99    7.20
  -4   0  -6  147.59    6.70
   4   0   6  148.39    8.30
  -4   0   6  143.39    8.30
  -4   0   6  157.08    6.50
  -4  -1  -6 1723.83   60.59
  -4   1   6 1703.43   62.79
   4  -1   6 1804.52   60.49
   4  -1   6 1724.63   62.39
  -4  -1  -6 1744.23   60.89
   4   1  -6 1834.42   62.29
  -4  -1   6 1726.63   62.49
  -4  -1   6 1766.02   61.29
  -4  -1   6 1773.42   62.19
   4   1   6 1834.72   62.89
  -4   1  -6 1807.42   62.29
   4   1   6 1814.42   60.29
   4  -1  -6 1827.52   61.49
   4  -2   6  155.18    6.90
  -4  -2  -6  155.68    8.20
   4   2  -6  168.58    9.00
  -4   2   6  169.98    9.80
  -4  -2  -6  148.79    6.80
   4  -2   6  159.88    8.90
   4   2   6  178.78    7.20
   4  -2  -6  162.68    8.20
  -4  -2   6  176.68    8.60
  -4   2  -6  177.38    7.80
   4   2   6  169.18    9.30
  -4  -2   6  153.08    8.50
  -4   2  -6  178.28    9.60
  -4   3   6 1612.44   59.09
   4   3  -6 1555.24   58.09
  -4  -3  -6 1622.24   57.39
  -4  -3  -6 1587.24   55.19
   4  -3   6 1578.64   57.79
   4  -3  -6 1656.43   56.99
  -4  -3   6 1643.74   58.09
  -4   3  -6 1686.43   59.49
   4   3   6 1642.84   58.39
  -4  -3   6 1654.73   56.89
  -4   3  -6 1627.84   56.59
   4   4  -6  218.38   12.30
  -4  -4  -6  237.18    9.60
  -4   4   6  229.78   13.20
  -4  -4  -6  225.78   12.10
   4  -4   6  232.68   12.00
  -4   4  -6  224.48   11.10
   4  -4  -6  238.58    9.10
   4  -4  -6  236.18   11.50
  -4  -4   6  238.38   10.80
   4  -4  -6  237.98    8.70
  -4  -4   6  239.18   12.70
  -4   4  -6  236.88   13.80
   4   4   6  245.08   12.60
  -4  -5  -6  264.97   14.00
   4  -5   6  275.77   13.60
  -4   5   6  256.17   14.80
  -4  -5  -6  290.87   11.30
   4   5  -6  265.97   14.40
   4  -5  -6  256.87   13.10
   4   5   6  239.68   13.70
  -4   5  -6  250.07   15.60
  -4   5  -6  251.77   12.80
   4  -5  -6  265.17   10.60
  -4  -5   6  266.17   11.80
  -4  -5   6  255.87   14.40
  -4  -6  -6   69.09    7.80
  -4  -6  -6   76.39    5.80
  -4   6   6   65.09    8.60
   4  -6   6   65.09    6.90
   4   6  -6   82.79    9.00
  -4   6  -6   82.29   10.40
  -4  -6   6   68.59    5.70
  -4   6  -6   70.79    7.10
   4  -6  -6   71.19    5.20
  -4  -6   6   66.09    8.10
   4  -6  -6   66.89    7.10
   4   6   6   81.99    8.00
  -4   7   6   31.20    6.90
  -4  -7  -6   33.00    6.40
  -4  -7  -6   26.40    4.10
   4   7  -6   28.30    6.20
   4  -7   6   28.70    5.30
  -4  -7   6   32.30    6.50
  -4   7  -6   30.10    5.40
   4  -7  -6   23.50    5.60
   4   7   6   26.60    5.60
  -4   0   7   36.10    3.00
  -4   0   7   35.00    4.60
   4   0  -7   42.10    4.30
  -4   0  -7   35.90    3.40
   4   0   7   41.30    5.00
  -4   0   7   36.80    3.00
  -4   0  -7   34.10    3.80
   4   1  -7  462.25   20.00
  -4  -1  -7  515.35   18.70
  -4   1   7  496.85   21.10
  -4  -1  -7  515.05   18.90
   4  -1   7  505.25   20.70
  -4  -1   7  480.95   20.20
  -4   1  -7  464.95   18.80
  -4   1  -7  497.95   20.20
   4  -1  -7  517.25   19.60
   4   1   7  506.45   20.90
  -4  -1   7  497.95   19.10
  -4  -2  -7  328.17   14.00
   4  -2   7  343.67   15.20
  -4  -2  -7  316.07   12.70
   4   2  -7  341.17   15.20
  -4   2   7  346.97   16.20
  -4  -2   7  332.87   14.60
   4   2   7  328.67   13.60
  -4  -2   7  335.57   14.70
  -4   2  -7  338.97   15.60
   4   2   7  330.77   15.60
  -4   2  -7  336.67   13.80
  -4  -3  -7  311.47   11.90
  -4   3   7  314.37   15.80
   4   3  -7  311.97   14.90
  -4  -3  -7  308.17   14.00
   4  -3   7  293.57   14.40
  -4   3  -7  325.37   16.10
   4   3   7  314.37   15.30
   4  -3  -7  306.77   13.70
  -4  -3   7  313.27   13.90
  -4  -3   7  297.07   14.60
  -4   3  -7  325.37   13.50
  -4   4   7   51.39    6.90
   4  -4   7   41.90    5.30
  -4  -4  -7   52.39    5.80
  -4  -4  -7   54.39    3.70
   4   4  -7   57.29    6.50
  -4  -4   7   48.80    6.20
  -4   4  -7   48.90    7.00
   4   4   7   42.50    6.00
  -4   4  -7   49.00    5.10
   4  -4  -7   40.60    5.00
  -4  -4   7   43.90    4.70
  -4  -5  -7  118.09    9.40
  -4   5   7  111.89   10.10
   4  -5   7  112.59    8.40
   4   5  -7  119.49    9.50
  -4  -5  -7  119.49    6.10
  -4  -5   7  110.29    9.60
   4   5   7  111.99    9.10
  -4   5  -7  111.19    8.00
   4  -5  -7  112.69    8.50
  -4   5  -7  122.99   10.90
  -4  -5   7  115.69    7.20
  -4   6   7    5.90    4.50
   4   6  -7    3.70    3.60
   4  -6   7    2.70    3.30
  -4  -6  -7   -0.90    4.10
  -4  -6  -7    1.90    2.30
   4   6   7    7.50    4.20
   4  -6  -7   -2.40    3.50
  -4   6  -7    8.90    4.70
  -4  -6   7    4.40    4.30
  -4   6  -7    5.10    3.40
  -4  -7  -7  210.38   13.90
   4   7  -7  183.48   14.00
  -4   7   7  211.28   15.20
   4  -7   7  195.38   12.40
  -4  -7   7  215.18   14.90
   4  -7  -7  211.58   13.40
   4   7   7  201.28   13.70
  -4   0  -8   21.60    3.00
  -4   0   8   24.60    2.60
   4   0   8   19.60    3.80
  -4   0  -8   17.90    3.10
   4   0  -8   13.70    3.20
  -4   0   8   26.00    4.50
  -4   0   8   21.70    2.30
  -4   1   8  380.16   17.80
  -4  -1  -8  381.96   15.40
  -4  -1  -8  378.56   15.20
   4  -1   8  372.46   17.30
   4   1  -8  310.77   16.20
  -4   1  -8  397.26   16.80
  -4  -1   8  381.36   17.10
   4   1   8  392.36   17.60
  -4  -1   8  386.26   15.60
   4  -1  -8  403.36   16.20
  -4   1  -8  400.16   15.60
  -4  -2  -8  261.27   11.80
   4  -2   8  250.07   13.10
   4   2  -8  259.07   13.10
  -4   2   8  247.28   14.00
  -4  -2  -8  260.07   10.70
   4   2   8  281.17   14.00
   4  -2  -8  246.68   11.90
  -4   2  -8  264.17   13.60
  -4  -2   8  266.37   12.50
  -4   2  -8  271.27   11.90
  -4  -2   8  246.78   12.70
  -4  -3  -8  134.59    6.40
  -4   3   8  154.88   10.70
   4  -3   8  146.69    9.30
   4   3  -8  148.49    9.60
  -4  -3  -8  139.69    8.70
   4   3   8  122.09    9.40
   4  -3  -8  124.09    8.20
  -4  -3   8  134.29    8.40
  -4   3  -8  134.59   10.20
  -4   3  -8  137.89    8.00
  -4  -3   8  142.09    9.10
  -4  -4  -8  427.16   15.80
  -4   4   8  438.36   21.10
  -4  -4  -8  429.36   18.70
   4   4  -8  438.16   19.90
   4  -4   8  423.46   19.10
  -4   4  -8  403.86   18.00
  -4   4  -8  427.16   21.10
  -4  -4   8  401.56   19.40
   4   4   8  411.06   19.90
  -4  -4   8  417.06   18.10
   4  -4  -8  410.76   18.40
   4  -5   8   27.60    5.10
  -4  -5  -8   31.00    3.10
  -4   5   8   27.10    6.40
   4   5  -8   34.70    6.20
  -4  -5  -8   25.30    5.40
   4   5   8   21.60    5.50
  -4   5  -8   28.40    4.90
  -4  -5   8   32.60    4.50
   4  -5  -8   21.50    4.70
  -4   5  -8   23.80    6.20
  -4  -5   8   21.50    5.60
   4   6  -8   83.49    9.50
  -4   6   8   85.39   10.50
  -4  -6  -8   74.99    8.30
   4  -6   8   93.49    8.30
   4  -6  -8   83.69    8.30
  -4   6  -8   88.59    8.10
  -4  -6   8   72.69    8.90
   4   6   8   81.79    9.30
  -4   6  -8   80.19   10.70
   4  -7   8    8.40    4.10
   4   7  -8    8.30    5.00
  -4  -7  -8    9.40    5.30
  -4   7   8    4.00    5.20
  -4  -7   8   17.00    6.20
   4   7   8    5.80    4.80
   4  -7  -8    3.70    4.60
  -4   0   9  115.49    8.80
   4   0   9  121.49    8.90
   4   0  -9  116.49    8.10
  -4   0  -9  125.09    7.00
  -4   0   9  113.69    6.00
  -4   0  -9  116.19    7.30
  -4   0   9  116.19    5.60
  -4  -1  -9    5.60    2.30
  -4   1   9    3.40    3.00
   4   1  -9    2.50    2.60
  -4  -1  -9    4.50    2.40
   4  -1   9    5.60    3.20
  -4   1  -9    1.70    2.70
   4   1   9    9.30    3.70
  -4  -1   9    2.10    2.60
  -4  -1   9    2.20    2.10
  -4   1  -9    5.40    2.30
   4  -1  -9    2.80    2.60
  -4  -2  -9  517.75   20.40
  -4  -2  -9  536.25   19.50
   4   2  -9  493.45   22.00
  -4   2   9  509.05   23.30
   4  -2   9  516.05   22.30
  -4   2  -9  451.05   20.30
  -4  -2   9  515.85   21.90
   4  -2  -9  495.55   20.70
  -4   2  -9  527.45   22.50
  -4  -2   9  502.85   20.90
   4   2   9  537.25   23.00
   4  -3   9   39.50    5.80
  -4  -3  -9   47.90    5.30
   4   3  -9   38.70    5.80
  -4  -3  -9   45.50    3.80
  -4   3   9   49.30    7.40
  -4   3  -9   39.70    6.50
   4  -3  -9   33.10    4.70
   4   3   9   32.10    5.90
  -4  -3   9   39.70    5.50
  -4   3  -9   43.50    5.00
  -4  -3   9   37.60    5.30
  -4   4   9  153.58   12.40
   4  -4   9  155.98   10.90
   4   4  -9  158.58   11.30
  -4  -4  -9  173.78   10.70
  -4  -4  -9  150.18    7.40
  -4   4  -9  177.58   12.70
   4  -4  -9  172.98   10.20
  -4  -4   9  182.08   10.10
  -4   4  -9  168.38   10.00
  -4  -4   9  176.68   11.40
   4   4   9  149.09   11.40
  -4   5   9   19.70    6.30
   4  -5   9   18.60    4.80
   4   5  -9   10.50    4.60
  -4  -5  -9    9.40    4.60
   4   5   9   12.50    5.10
   4  -5  -9   12.10    4.20
  -4  -5   9   15.60    4.90
  -4  -5   9   17.80    4.00
  -4   5  -9   18.10    4.20
  -4   5  -9   18.80    6.00
  -4  -6  -9   23.60    5.60
   4   6  -9    9.90    4.90
  -4   6   9   26.00    7.10
   4  -6   9   13.80    4.50
  -4  -6   9   26.80    6.60
   4   6   9   25.70    6.30
  -4   6  -9   17.20    6.30
   4  -6  -9   23.30    5.40
  -4   0 -10   73.19    6.00
   4   0 -10   80.89    7.20
  -4   0  10   85.79    5.10
  -4   0 -10   68.29    6.30
  -4   0  10   82.29    8.10
   4   0  10   64.49    7.50
  -4  -1 -10   62.59    5.60
  -4   1  10   62.69    7.70
   4  -1  10   53.19    6.80
  -4  -1 -10   74.29    5.70
   4   1 -10   64.99    6.80
  -4  -1  10   72.29    7.90
   4   1  10   73.29    7.90
  -4   1 -10   61.59    6.60
   4  -1 -10   68.99    6.40
  -4   1 -10   74.39    6.10
  -4  -1  10   70.59    5.80
   4  -2  10    6.40    3.80
   4   2 -10    8.30    3.70
  -4  -2 -10    6.20    2.30
  -4   2  10    8.30    4.20
  -4  -2 -10    4.10    3.10
  -4   2 -10    9.90    4.10
  -4  -2  10    7.40    3.60
  -4  -2  10   17.30    3.80
   4  -2 -10    7.90    3.40
   4   2  10    7.80    3.90
  -4   2 -10    5.20    2.80
  -4  -3 -10   70.29    6.90
  -4  -3 -10   73.89    7.00
   4   3 -10   66.89    7.80
   4  -3  10   54.59    7.10
  -4   3  10   70.49    9.20
   4  -3 -10   60.79    6.50
  -4  -3  10   65.19    7.10
  -4   3 -10   63.39    6.40
  -4   3 -10   73.09    8.70
  -4  -3  10   68.79    7.20
   4   3  10   67.59    8.40
   4   4 -10    0.20    3.40
  -4   4  10   -0.60    4.60
  -4  -4 -10   -1.20    3.60
   4  -4  10   -1.70    3.20
   4   4  10   -0.70    3.50
  -4  -4  10    2.60    3.80
   4  -4 -10   -3.00    3.20
  -4   4 -10    0.20    4.00
  -4  -4  10    1.90    3.00
  -4   4 -10    1.20    3.00
   4   5 -10   59.59    8.20
  -4   5  10   47.10    8.00
  -4  -5 -10   49.10    6.80
   4  -5  10   57.59    7.60
   4  -5 -10   54.09    6.80
  -4  -5  10   75.49    8.90
  -4   5 -10   44.90    8.10
   4   5  10   66.79    9.30
  -4  -5  10   64.59    7.00
  -4   6  10    5.60    5.80
   4   6 -10   10.90    5.20
  -4  -6 -10    8.60    4.90
   4  -6  10   11.30    4.80
  -4   6 -10    2.00    5.40
  -4  -6  10   12.70    5.60
   4   6  10   -0.40    5.10
   4  -6 -10    5.40    4.40
  -4   0  11    1.70    3.50
   4   0 -11    2.80    3.20
  -4   0 -11    2.30    2.70
   4   0  11    1.40    3.50
  -4   0 -11   -1.70    2.70
  -4  -1 -11  250.47   12.80
  -4   1  11  253.37   15.70
   4  -1  11  273.27   15.50
   4   1 -11  266.87   14.60
  -4  -1 -11  259.97   12.60
  -4   1 -11  291.57   13.60
  -4  -1  11  279.07   12.70
  -4  -1  11  286.27   15.60
   4   1  11  270.37   15.80
  -4   1 -11  264.37   14.40
   4  -1 -11  271.27   14.00
   4   2 -11  112.09    9.30
   4  -2  11  113.29    9.70
  -4   2  11  108.39   10.50
  -4  -2 -11  103.09    7.70
   4   2  11  111.99    9.80
  -4  -2  11  110.09    9.30
  -4   2 -11  103.09    7.90
  -4  -2  11  105.29    8.30
  -4   2 -11  123.39    9.70
   4  -2 -11  108.99    8.50
   4   3 -11  292.17   17.10
  -4   3  11  333.57   19.20
  -4  -3 -11  363.66   16.10
   4  -3  11  339.57   17.90
   4   3  11  303.57   17.90
   4  -3 -11  324.67   16.00
  -4   3 -11  300.57   15.60
  -4   3 -11  347.07   18.50
  -4  -3  11  322.87   16.90
  -4  -3  11  339.87   16.60
  -4   4  11    3.30    5.00
   4  -4  11   -1.00    3.50
  -4  -4 -11    5.50    4.00
   4   4 -11   10.70    4.50
   4   4  11    3.30    4.20
  -4  -4  11    3.90    4.20
  -4   4 -11    0.20    3.80
   4  -4 -11    5.80    4.00
  -4  -4  11    2.50    3.40
  -4   4 -11    2.80    5.00
  -4   5  11   61.89    9.90
  -4  -5 -11   41.60    6.50
   4   5 -11   57.09    8.50
   4  -5  11   44.20    7.30
  -4  -5  11   42.70    6.30
  -4  -5  11   43.00    7.20
  -4   5 -11   37.10    8.10
   4  -5 -11   41.10    6.50
   4   5  11   50.09    8.50
  -4   0 -12   89.59    8.10
  -4   0  12  108.09   10.40
   4   0  12   91.09    9.70
   4   0 -12   97.49    8.50
  -4   0 -12   96.19    7.60
   4  -1  12  127.69   11.10
  -4  -1 -12  126.39    8.90
  -4   1  12  145.99   12.00
   4   1 -12  142.99   10.60
  -4   1 -12  129.59    9.90
   4   1  12  137.89   11.60
   4  -1 -12  130.29    9.80
  -4  -1  12  146.79   11.40
  -4   1 -12  155.68    9.60
  -4   2  12  179.18   13.80
   4   2 -12  192.28   13.00
   4  -2  12  181.88   13.20
  -4  -2 -12  188.18   11.20
  -4  -2  12  207.68   13.50
  -4   2 -12  219.38   12.10
   4  -2 -12  216.38   12.60
  -4  -2  12  221.38   11.80
  -4   2 -12  190.78   13.00
   4   2  12  216.68   14.20
   4   3 -12   64.19    8.50
   4  -3  12   81.99    9.50
  -4  -3 -12   71.29    7.40
  -4   3  12   73.59   10.50
  -4   3 -12   71.49    7.60
  -4   3 -12   75.89    9.30
  -4  -3  12   83.49    8.90
   4   3  12   87.89   10.60
  -4  -3  12   79.99    8.20
   4  -3 -12   61.79    7.30
  -4  -4 -12  114.79   10.00
   4   4 -12  111.39   10.50
  -4   4  12  120.49   12.70
   4  -4  12  124.49   11.00
  -4  -4  12  129.69   10.70
  -4   4 -12  127.89   12.40
  -4  -4  12  112.59   10.10
   4  -4 -12  119.79    9.90
   4   4  12  140.59   12.30
   4   0 -13  137.29   10.60
   4   0  13  128.49   11.60
  -4   0  13  116.59   11.40
  -4   0 -13  122.19    9.10
   4  -1  13   11.40    5.30
  -4  -1 -13    6.10    3.60
  -4   1  13   10.60    5.80
   4   1 -13   13.60    4.70
   4  -1 -13   10.80    4.40
  -4   1 -13   12.50    4.00
  -4   1 -13    5.80    4.00
   4   1  13    3.80    5.00
  -4  -1  13    5.60    4.60
   4  -2  13    1.30    4.40
   4   2 -13    5.30    4.00
  -4   2  13    0.40    4.90
  -4  -2 -13    4.80    3.80
  -4  -2  13   -0.90    4.30
  -4   2 -13    0.40    2.90
  -4   2 -13    7.60    4.70
   4  -2 -13   -0.50    3.90
   4   2  13   -1.10    4.30
   4   3 -13    8.70    4.50
   4  -3  13    6.50    4.90
  -4  -3 -13    4.90    4.10
  -4   3  13    6.70    5.40
   4   3  13    9.20    5.70
  -4  -3  13    2.10    4.30
   4  -3 -13    6.60    4.60
  -4   3 -13    5.60    5.10
  -4  -3  13   11.40    5.20
  -4   0 -14   32.80    5.50
  -4   0  14   28.80    7.10
   4   0 -14   33.40    6.30
   4   0  14   33.20    7.20
   5   0   0   -0.20    1.00
  -5   0   0    0.20    0.70
   5   0   0   -0.10    0.60
   5   0   0   -0.60    1.10
   5   0   0   -0.80    0.70
  -5   0   0   -0.50    0.70
   5   1   0 2844.82   95.79
   5  -1   0 2738.93   94.59
  -5  -1   0 2818.72   95.19
  -5   1   0 2919.81   95.39
  -5  -1   0 2840.92   95.69
  -5  -1   0 2835.32   94.79
   5  -1   0 2907.71   95.09
  -5   1   0 2851.31   94.69
   5   1   0 2795.82   94.69
  -5   1   0 2799.52   95.99
   5   2   0 1561.44   54.59
   5  -2   0 1607.14   54.79
   5  -2   0 1615.24   53.59
  -5   2   0 1537.65   54.19
  -5  -2   0 1534.95   53.79
   5  -2   0 1559.94   53.89
  -5   2   0 1548.25   54.69
  -5  -2   0 1590.04   52.49
   5  -2   0 1588.44   53.19
   5   3   0 2808.92   96.89
  -5  -3   0 2866.51   96.79
  -5  -3   0 2935.51   98.69
  -5   3   0 2911.81   98.19
   5   3   0 2912.11   99.69
  -5   3   0 2848.22   99.39
   5  -3   0 2978.10   98.59
  -5   3   0 2956.70   99.39
   5   4   0   58.29    5.80
  -5  -4   0   65.49    3.30
  -5   4   0   67.79    5.90
  -5  -4   0   58.69    5.30
  -5   4   0   58.79    4.80
  -5  -5   0  937.11   32.90
   5  -5   0  918.21   35.90
  -5   5   0  933.91   34.70
  -5  -5   0  933.71   32.50
   5   5   0  929.81   36.20
  -5  -5   0  930.91   35.10
  -5   5   0  953.70   36.20
  -5  -6   0    2.10    1.80
   5   6   0   -2.30    3.00
   5  -6   0   -0.90    2.70
  -5   6   0   -2.60    2.20
  -5  -6   0   -0.50    2.90
  -5  -7   0  165.68   11.30
   5  -7   0  162.08   11.30
   5   7   0  182.58   12.80
  -5   7   0  180.88   11.20
   5  -7   0  181.38   11.90
   5   8   0   68.39    8.90
  -5   8   0   62.79    7.50
   5  -8   0   46.20    7.30
  -5  -8   0   50.89    7.30
   5  -8   0   58.59    7.80
  -5   0   1  116.19    5.30
  -5   0  -1  115.39    4.70
  -5   0   1  112.69    4.60
   5   0  -1  116.39    5.30
   5   0   1  121.79    5.40
   5   0  -1  117.79    4.60
  -5   0  -1  126.19    5.60
  -5   0   1  120.29    5.00
   5   0  -1  116.39    5.00
   5   0   1  115.59    4.70
  -5  -1  -1  200.38    7.70
  -5   1   1  184.78    8.50
  -5   1   1  197.08    7.60
   5   1  -1  191.78    8.30
  -5  -1  -1  197.78    7.60
   5  -1   1  196.08    6.80
   5  -1   1  188.98    6.90
   5   1  -1  195.98    8.00
   5   1  -1  193.28    7.30
  -5   1   1  207.38    7.70
  -5  -1  -1  198.88    8.30
   5  -1   1  199.88    8.70
   5   1   1  206.68    7.80
   5   1   1  204.28    8.40
  -5  -1   1  203.18    8.30
  -5  -1   1  201.08    7.40
  -5   1  -1  205.18    8.20
  -5  -1   1  204.08    8.00
   5  -1  -1  200.38    7.60
   5   1   1  203.18    7.60
   5  -1  -1  207.18    7.40
  -5  -2  -1  989.50   33.90
  -5   2   1 1047.30   34.30
  -5  -2  -1 1046.50   33.30
  -5   2   1 1011.50   35.20
   5  -2   1 1013.70   35.10
   5  -2   1 1024.90   33.60
   5  -2   1 1055.79   35.30
   5   2  -1 1000.20   35.00
   5  -2   1  988.90   34.50
  -5   2  -1  920.81   33.30
   5   2   1  909.51   34.70
   5   2   1  955.90   33.30
  -5   2  -1  913.61   34.70
  -5  -2   1  925.31   34.20
   5  -2  -1  947.71   33.80
   5  -2  -1  939.91   34.90
   5   2   1  951.10   34.20
   5  -2  -1  941.31   33.60
   5  -2  -1  946.61   33.90
   5  -3   1 1371.16   47.50
   5  -3   1 1332.87   48.60
  -5   3   1 1324.67   48.70
  -5   3   1 1388.06   48.10
  -5  -3  -1 1280.87   47.50
   5   3  -1 1340.87   48.80
  -5  -3  -1 1353.56   46.60
   5   3   1 1409.26   48.90
  -5  -3   1 1330.17   48.10
   5  -3  -1 1408.86   47.80
  -5   3  -1 1394.16   47.20
  -5   3  -1 1406.96   48.90
   5  -3  -1 1401.76   47.40
   5   3   1 1402.06   46.70
  -5   4   1  662.63   25.20
  -5   4   1  679.33   26.10
  -5   4   1  651.03   26.40
   5   4  -1  658.93   26.60
  -5  -4  -1  655.93   25.30
  -5  -4  -1  674.83   23.90
   5  -4   1  664.33   26.30
  -5   4  -1  656.43   25.00
  -5  -4   1  670.53   25.90
   5   4   1  683.33   24.20
  -5   4  -1  690.33   26.90
  -5  -4   1  678.03   23.20
   5   4   1  667.03   26.60
  -5  -4   1  727.63   23.30
   5  -5   1  157.98    9.30
  -5  -5  -1  143.29    6.70
  -5  -5  -1  141.49    8.40
   5   5  -1  142.29    9.60
  -5   5   1  131.19    8.00
  -5   5   1  137.49    8.80
  -5   5   1  132.39    8.90
   5   5   1  129.49    9.40
  -5   5  -1  134.19    8.00
  -5  -5   1  135.69    6.00
   5   5   1  140.09    7.00
  -5   5  -1  139.59    9.50
  -5  -5   1  133.69    8.70
  -5  -5   1  149.39    6.20
  -5   6   1  114.39    8.00
   5   6  -1  104.69    9.30
   5  -6   1  106.99    8.30
  -5   6   1   94.39    8.60
  -5  -6  -1   96.09    7.80
  -5  -6   1  109.19    8.60
  -5  -6   1  124.89    5.80
   5   6   1  122.49    6.70
  -5   6  -1  121.99    8.10
   5   6   1  117.99    9.60
   5  -6  -1  115.79    8.30
  -5   6  -1  114.09    9.50
  -5  -7  -1   13.10    4.40
   5   7  -1   13.00    4.80
  -5   7   1   14.00    3.90
   5  -7   1    9.30    4.30
   5  -7   1   20.90    4.90
   5   7   1   12.30    4.70
   5  -7  -1   14.90    5.00
  -5   7  -1    9.80    3.70
  -5  -7   1    6.00    4.00
   5  -7  -1    4.80    3.60
   5   8  -1   26.70    6.40
   5  -8   1   27.20    5.90
   5  -8   1   26.50    5.70
  -5  -8  -1   24.30    5.60
  -5  -8   1   32.60    6.30
  -5   8  -1   23.00    5.20
   5  -8  -1   35.40    6.70
   5  -8  -1   27.90    5.50
   5   8   1   32.90    6.60
  -5   0   2 2922.91   98.19
  -5   0   2 3143.59   98.79
  -5   0  -2 2895.01   98.29
   5   0   2 2923.81   99.19
   5   0  -2 2932.31   99.09
   5   0   2 3064.59   98.49
  -5   0  -2 2858.21   98.49
   5   0   2 2842.12   98.19
   5   0  -2 2959.30   98.29
  -5   0   2 2845.22   99.09
   5   0  -2 3029.50   98.99
  -5   0  -2 2854.71   99.29
   5   1  -2 1236.38   43.50
  -5  -1  -2 1261.37   43.40
   5   1  -2 1273.07   42.60
  -5  -1  -2 1218.88   42.50
   5   1  -2 1233.78   43.10
  -5   1   2 1245.88   43.90
  -5   1   2 1291.37   42.30
  -5  -1  -2 1279.17   43.10
   5  -1   2 1235.18   43.70
  -5   1   2 1260.47   42.90
  -5   1  -2 1316.47   43.50
   5  -1  -2 1250.67   42.80
  -5  -1   2 1246.78   43.00
   5  -1  -2 1302.57   42.10
   5   1   2 1249.97   43.30
   5   1   2 1272.47   43.10
  -5  -1   2 1232.28   42.60
   5   1   2 1306.17   42.70
   5  -1  -2 1062.49   43.50
   5  -2   2 1121.89   40.50
  -5   2   2 1227.58   39.40
   5  -2   2 1245.48   38.90
   5   2  -2 1191.48   38.50
   5   2  -2 1191.08   40.60
  -5   2   2 1187.28   40.90
  -5  -2  -2 1199.18   39.30
  -5   2   2 1219.78   39.80
  -5  -2  -2 1209.38   39.50
   5  -2  -2 1111.89   38.90
  -5   2  -2 1002.00   40.60
   5   2   2 1114.79   39.40
  -5  -2   2 1113.19   38.50
  -5   2  -2 1079.99   38.70
   5   2   2 1138.69   39.60
   5   2   2 1083.29   40.30
   5  -2  -2 1103.69   39.30
  -5   2  -2 1069.09   40.50
  -5  -2   2 1055.09   39.90
  -5   3   2 1492.75   52.49
  -5   3   2 1494.45   51.19
  -5  -3  -2 1487.75   50.79
   5  -3   2 1510.05   50.69
  -5  -3  -2 1470.85   50.59
   5   3  -2 1459.95   52.29
   5  -3   2 1370.36   51.99
  -5  -3   2 1454.95   49.30
   5  -3  -2 1458.85   50.89
   5   3   2 1487.75   52.29
  -5  -3   2 1494.45   51.89
   5   3   2 1488.25   50.69
  -5   3  -2 1486.85   50.59
  -5   3  -2 1461.85   52.59
  -5  -3   2 1426.16   49.40
   5  -3  -2 1484.65   50.89
  -5   4   2  874.91   32.00
   5  -4   2  882.31   32.70
  -5  -4  -2  894.61   30.80
   5   4  -2  872.01   33.10
  -5   4   2  854.11   32.90
  -5  -4  -2  878.01   31.40
   5   4   2  833.92   30.90
  -5  -4   2  858.11   32.50
  -5   4  -2  847.22   31.30
  -5  -4   2  850.81   29.40
   5  -4  -2  882.01   31.60
  -5  -4   2  847.92   29.60
   5   4   2  867.21   33.00
  -5   4  -2  842.22   33.30
   5   5  -2   19.80    4.30
   5  -5   2    9.30    3.50
  -5  -5  -2   12.20    3.30
  -5   5   2   22.30    4.40
  -5  -5   2   18.30    4.00
   5   5   2   17.80    2.90
  -5  -5   2   15.80    1.90
   5  -5  -2   14.90    3.40
   5   5   2   12.90    3.80
  -5  -5   2   12.20    1.70
  -5   5  -2   20.60    4.80
  -5   5  -2   18.30    3.40
   5   6  -2   33.90    5.70
  -5   6   2   37.90    5.80
  -5  -6  -2   27.10    4.50
   5  -6   2   32.60    5.20
  -5  -6   2   42.60    6.10
   5   6   2   38.00    6.00
  -5   6  -2   42.20    5.20
  -5   6  -2   41.20    6.90
   5   6   2   46.70    4.70
  -5  -6   2   38.90    3.10
   5  -6  -2   41.10    5.10
   5  -6  -2   41.20    5.30
   5  -7   2  102.79    8.50
   5   7  -2   80.29    9.00
  -5   7   2   92.59    9.00
  -5  -7  -2   91.39    8.00
   5   7   2   92.49    9.50
   5  -7  -2   95.89    8.20
  -5   7  -2   88.49    8.00
  -5  -7   2   86.89    9.00
   5  -7  -2   85.09    7.70
   5  -8   2   22.40    6.10
   5  -8   2   23.80    5.40
   5   8  -2   23.40    6.30
  -5  -8  -2   22.10    5.10
  -5   8  -2   17.80    4.80
   5  -8  -2   14.60    4.70
   5   8   2   20.30    6.00
   5  -8  -2   24.70    6.00
   5  -8  -2   17.30    4.70
  -5  -8   2   16.70    5.30
  -5   0  -3  675.93   24.00
  -5   0  -3  694.83   24.30
   5   0   3  729.63   24.50
  -5   0  -3  714.13   25.50
  -5   0   3  683.73   24.00
   5   0  -3  697.93   24.20
   5   0  -3  730.43   25.10
  -5   0  -3  687.43   24.60
   5   0  -3  711.43   25.20
  -5   0   3  669.13   25.20
   5   0   3  705.43   25.30
  -5   1   3 1314.47   42.30
  -5  -1  -3 1303.47   43.90
  -5   1   3 1235.58   44.30
  -5   1   3 1264.87   43.40
   5  -1   3 1352.06   42.30
   5   1  -3 1344.97   43.40
   5  -1   3 1256.77   44.20
  -5  -1  -3 1289.67   42.80
  -5  -1  -3 1304.37   43.90
   5   1  -3 1295.57   43.60
   5  -1   3 1207.58   43.60
   5   1  -3 1318.67   44.10
  -5  -1   3 1205.28   43.30
   5   1   3 1253.17   42.90
   5  -1  -3 1228.98   43.30
  -5   1  -3 1203.28   43.90
  -5  -1   3 1200.08   43.40
  -5   1  -3 1245.68   42.30
   5   1   3 1235.18   43.80
   5  -1  -3 1215.38   42.20
   5   1   3 1182.68   43.40
   5   2  -3  202.08   10.10
   5  -2   3  197.98   10.10
  -5   2   3  210.18    8.60
   5  -2   3  210.68    8.40
  -5  -2  -3  208.48    9.50
  -5   2   3  204.48   10.50
   5   2  -3  212.98    8.80
  -5  -2  -3  204.28    8.80
  -5   2  -3  237.88    8.80
   5  -2  -3  257.57    8.40
   5  -2  -3  250.47    9.60
  -5  -2   3  234.78   10.10
   5   2   3  257.67    9.40
   5   2   3  242.48    9.80
   5   2   3  260.77   10.40
  -5  -2   3  249.88    9.00
  -5   2  -3  252.17   10.90
  -5   3   3 1087.09   40.30
  -5  -3  -3 1091.49   38.80
  -5   3   3 1123.39   38.40
   5   3  -3 1100.19   40.10
   5  -3   3 1121.29   39.80
   5   3  -3 1079.39   37.60
   5  -3   3 1140.29   38.20
  -5  -3  -3 1103.59   38.20
  -5   3  -3 1061.19   38.20
   5  -3  -3 1066.79   38.70
   5  -3  -3 1114.49   38.10
   5   3   3 1074.99   39.80
  -5  -3   3 1098.79   37.50
  -5  -3   3 1092.39   39.70
  -5   3  -3 1080.99   40.60
   5   3   3 1112.99   38.90
   5  -4   3  472.75   19.60
  -5  -4  -3  468.95   18.20
  -5   4   3  490.65   20.50
   5   4  -3  453.25   20.00
  -5  -4   3  466.25   17.10
  -5  -4   3  490.85   19.90
   5  -4  -3  467.55   18.70
   5   4   3  469.55   18.60
  -5   4  -3  477.45   18.50
  -5   4  -3  470.25   20.80
  -5  -4   3  464.65   16.90
   5   4   3  485.45   20.10
  -5   5   3  702.53   29.00
   5  -5   3  694.83   28.20
   5   5  -3  700.23   29.10
  -5  -5  -3  723.43   26.90
   5  -5  -3  694.43   26.80
   5   5   3  710.93   28.90
  -5  -5   3  725.63   28.70
  -5  -5   3  710.23   25.00
   5   5   3  712.03   27.10
  -5   5  -3  727.83   30.00
   5  -5  -3  735.93   27.60
  -5  -5   3  707.73   25.30
  -5   5  -3  706.93   27.30
   5  -6   3  426.96   19.40
  -5  -6  -3  414.96   18.30
   5   6  -3  409.96   20.40
  -5   6   3  429.16   20.70
   5   6   3  438.96   18.40
   5   6   3  450.65   20.70
  -5   6  -3  439.56   18.90
  -5   6  -3  410.96   21.40
  -5  -6   3  455.65   20.50
   5  -6  -3  427.46   19.00
   5  -6  -3  445.56   18.50
  -5  -6   3  436.86   15.90
  -5   7   3   18.90    5.40
   5   7  -3   13.30    4.90
   5  -7   3   17.90    4.50
  -5  -7  -3   12.30    3.80
  -5   7  -3   13.60    4.20
   5   7   3   12.20    4.70
   5   7   3   11.50    5.50
  -5  -7   3    6.30    4.40
   5  -7  -3   13.00    4.20
   5  -7  -3   15.60    3.90
  -5   8   3   -2.50    3.90
   5  -8   3    8.80    4.90
   5   8  -3    9.60    4.70
  -5  -8  -3    5.60    3.60
   5  -8   3    4.70    4.00
   5  -8  -3    9.40    3.70
  -5   8  -3   12.50    4.40
   5   8   3   -2.30    4.20
  -5  -8   3    6.90    5.00
   5  -8  -3    6.40    4.30
  -5   0  -4  130.09    5.50
  -5   0   4  131.39    5.40
  -5   0  -4  136.49    5.90
  -5   0  -4  131.29    6.10
   5   0  -4  127.99    6.60
  -5   0   4  138.19    7.00
   5   0  -4  136.29    6.70
   5   0   4  140.99    5.90
   5   0   4  126.99    6.70
  -5  -1  -4 3291.47  115.79
  -5   1   4 3257.07  117.59
   5   1  -4 3398.36  116.69
  -5  -1  -4 3299.67  116.29
   5  -1   4 3445.66  115.39
  -5  -1  -4 3389.46  116.89
   5   1  -4 3389.16  117.19
   5  -1   4 3316.87  117.29
   5   1   4 3719.93  115.89
   5   1   4 3389.16  117.19
   5  -1  -4 3560.54  116.59
  -5  -1   4 3583.54  117.09
  -5   1  -4 3662.73  115.69
  -5  -1   4 3576.84  116.89
  -5  -1   4 3514.75  116.49
  -5   1  -4 3540.95  117.29
   5   2  -4  756.12   27.50
   5  -2   4  752.62   25.30
  -5   2   4  758.42   28.10
   5   2  -4  731.93   26.10
  -5  -2  -4  727.03   25.50
   5  -2   4  757.92   27.50
  -5   2  -4  726.43   25.60
  -5  -2   4  726.13   27.00
  -5   2  -4  719.43   27.80
   5   2   4  759.72   26.10
   5   2   4  696.73   26.90
   5   2   4  709.23   27.00
   5  -2  -4  715.33   26.40
  -5  -2   4  711.63   26.10
  -5   3   4 1241.18   45.30
   5   3  -4 1275.17   42.80
   5  -3   4 1243.38   42.60
   5   3  -4 1200.78   44.70
   5  -3   4 1242.78   44.60
  -5  -3  -4 1229.18   42.60
  -5   3  -4 1169.38   45.30
  -5  -3   4 1229.28   42.70
   5  -3  -4 1254.57   43.50
  -5   3  -4 1184.08   42.90
   5   3   4 1244.68   44.00
   5   3   4 1227.68   44.50
   5  -3  -4 1222.98   42.10
  -5  -3   4 1252.07   44.50
   5  -3  -4 1277.37   42.10
  -5   4   4  110.19    8.20
   5   4  -4  118.99    5.80
   5  -4   4  111.59    7.60
   5   4  -4  113.89    8.20
  -5  -4  -4  120.19    6.20
  -5  -4   4  117.49    8.00
   5  -4  -4  107.29    5.80
   5   4   4  117.39    7.10
  -5  -4   4  111.19    5.50
  -5   4  -4  116.29    6.60
   5  -4  -4  111.29    7.00
  -5   4  -4  108.89    8.50
   5   4   4  105.59    7.70
   5  -4  -4  106.99    5.90
   5  -5   4  296.57   13.90
  -5  -5  -4  285.37   12.00
  -5   5   4  307.67   15.00
   5   5  -4  287.47   14.70
  -5  -5   4  252.17   11.00
  -5   5  -4  270.77   12.60
  -5  -5   4  260.17   10.70
   5  -5  -4  275.67   13.20
  -5  -5   4  269.87   14.20
   5   5   4  271.47   14.30
  -5   5  -4  240.88   14.90
   5   5   4  266.77   12.80
   5  -5  -4  258.77   11.80
  -5  -6  -4   57.09    5.70
  -5   6   4   52.89    7.40
   5  -6   4   56.49    6.60
   5   6  -4   65.19    7.70
  -5   6  -4   48.80    5.70
  -5  -6   4   50.59    7.20
  -5  -6   4   47.00    4.00
   5   6   4   52.29    7.00
   5  -6  -4   55.49    6.10
   5   6   4   48.50    5.90
   5  -6  -4   58.49    5.50
  -5   6  -4   46.60    7.80
  -5   7   4  103.89   10.10
  -5  -7  -4  113.79    8.30
   5   7  -4  108.19   10.20
   5  -7   4  115.09    9.20
  -5   7  -4  123.59    9.10
   5   7   4  115.69    8.60
   5  -7  -4  128.09    8.50
   5  -7  -4  114.19    9.10
  -5   7  -4   80.79   10.30
   5   7   4  132.59   10.80
  -5  -7   4  122.29   10.20
   5  -8   4   14.50    5.90
  -5   8   4   17.70    6.00
  -5  -8  -4   15.70    4.30
   5  -8   4   13.30    4.50
   5   8  -4   13.50    5.30
  -5  -8   4   12.10    5.40
   5  -8  -4   13.30    4.80
   5  -8  -4   15.40    4.00
   5   8   4   13.80    5.60
  -5   8  -4   16.30    4.80
  -5   0   5   36.70    2.90
  -5   0  -5   39.60    3.40
   5   0   5   40.90    4.00
   5   0  -5   34.40    3.70
  -5   0   5   39.00    4.20
  -5   0  -5   46.00    2.80
  -5   0   5   38.80    2.60
  -5  -1  -5 3090.39  103.99
  -5   1   5 3077.19  105.79
   5  -1   5 3177.58  103.29
   5   1  -5 3210.88  105.29
   5  -1   5 3100.69  105.39
  -5  -1  -5 3001.50  103.59
   5   1   5 3255.57  103.59
   5  -1  -5 3120.29  104.49
  -5   1  -5 3060.19  105.09
   5   1   5 3093.29  105.49
  -5  -1   5 3085.19  104.69
  -5   1  -5 2822.32  103.39
  -5  -1   5 3057.09  104.89
  -5  -1   5 2992.40  104.19
  -5   2   5  840.62   31.10
  -5  -2  -5  829.72   29.50
   5   2  -5  845.42   30.40
  -5  -2  -5  811.62   28.10
   5  -2   5  846.02   27.90
   5  -2   5  820.42   30.30
   5   2  -5  800.02   29.20
   5   2   5  814.82   29.40
   5   2   5  767.32   30.00
   5  -2  -5  765.12   29.10
  -5   2  -5  794.92   30.70
  -5   2  -5  792.42   28.40
  -5  -2   5  787.92   29.20
  -5  -2   5  784.52   29.70
   5  -3   5  844.32   32.80
   5   3  -5  842.52   33.10
  -5  -3  -5  861.71   30.60
  -5   3   5  821.72   33.60
   5   3  -5  848.72   31.50
   5  -3   5  857.91   30.70
  -5  -3   5  871.01   32.90
   5  -3  -5  895.01   32.00
   5  -3  -5  907.11   29.70
   5   3   5  902.51   32.80
  -5   3  -5  905.21   34.20
  -5  -3   5  890.81   31.50
   5   3   5  891.31   32.90
   5  -3  -5  906.41   29.70
  -5   3  -5  899.11   31.40
   5   4  -5  169.58   10.60
   5  -4   5  181.38   10.10
   5   4  -5  179.68    8.60
  -5   4   5  176.18   11.00
  -5  -4  -5  180.68    8.20
  -5  -4   5  182.78    8.30
  -5  -4   5  184.48   10.60
   5   4   5  191.38   10.20
   5  -4  -5  189.68    7.70
   5  -4  -5  184.58    9.60
   5  -4  -5  185.38    7.80
  -5   4  -5  188.48    9.10
   5   4   5  177.78   10.30
  -5   4  -5  187.48   11.40
  -5   5   5   29.00    5.40
  -5  -5  -5   33.10    3.70
   5  -5   5   34.00    5.00
   5   5  -5   34.30    5.60
  -5   5  -5   27.00    4.00
  -5  -5   5   31.00    3.30
   5  -5  -5   30.50    3.50
  -5  -5   5   30.10    5.20
   5   5   5   28.70    4.70
  -5   5  -5   36.00    6.60
   5  -5  -5   24.70    4.10
   5   5   5   26.50    4.90
  -5   6   5   57.49    7.90
  -5  -6  -5   48.70    5.10
   5  -6   5   56.19    6.50
   5   6  -5   52.69    7.30
   5  -6  -5   64.29    5.20
  -5  -6   5   54.59    7.30
   5   6   5   48.80    6.70
   5  -6  -5   61.79    6.90
   5   6   5   56.09    6.60
  -5   6  -5   54.19    6.00
  -5   6  -5   48.20    8.20
   5  -7   5   49.00    6.70
  -5  -7  -5   61.89    6.10
  -5   7   5   51.39    7.90
   5   7  -5   46.30    7.50
   5  -7  -5   48.00    6.50
   5  -7  -5   52.69    5.50
  -5   7  -5   63.39    7.10
  -5   7  -5   39.40    7.70
  -5  -7   5   49.30    7.60
   5   7   5   45.50    7.10
   5   7   5   45.90    6.30
   5   8  -5   -0.70    4.10
  -5   8   5    0.70    4.30
  -5  -8  -5   -5.50    2.90
   5  -8   5   -2.90    4.30
  -5  -8   5   -2.00    4.00
   5   8   5    1.70    4.40
   5  -8  -5   -4.00    3.60
  -5   0   6  703.03   24.60
   5   0   6  686.53   26.70
  -5   0  -6  711.83   24.80
  -5   0   6  711.93   27.00
  -5   0   6  712.53   24.80
  -5   0  -6  675.23   25.60
   5   0  -6  680.43   26.20
   5   1  -6   66.39    5.40
   5  -1   6   69.19    3.90
  -5  -1  -6   65.09    4.10
   5  -1   6   68.09    5.60
  -5   1   6   67.89    6.00
  -5  -1  -6   67.09    4.50
  -5  -1   6   73.79    4.70
   5  -1  -6   79.69    5.20
  -5   1  -6   77.09    5.70
  -5   1  -6   57.99    4.00
   5   1   6   67.89    5.80
  -5  -1   6   74.09    5.50
  -5  -1   6   70.39    5.70
   5  -2   6  319.27   11.40
  -5   2   6  321.97   14.70
   5  -2   6  333.07   14.00
   5   2  -6  313.77   13.80
  -5  -2  -6  300.27   11.50
  -5  -2  -6  323.97   12.90
   5  -2  -6  281.87   12.60
   5   2   6  276.17   13.50
  -5  -2   6  270.37   12.70
  -5  -2   6  266.27   12.80
  -5   2  -6  288.57   12.00
  -5   2  -6  296.67   14.10
  -5   3   6  205.58   11.30
  -5  -3  -6  189.08    7.90
   5   3  -6  182.28   10.50
   5  -3   6  189.78   10.30
   5  -3   6  194.78    8.20
  -5  -3  -6  197.58   10.10
  -5  -3   6  194.28   10.40
  -5  -3   6  182.88    9.10
  -5   3  -6  201.08   11.50
   5   3   6  178.08   10.30
   5  -3  -6  182.58    9.50
  -5   3  -6  192.28    8.90
   5   4  -6   67.19    7.00
  -5   4   6   91.59    7.90
  -5  -4  -6   76.39    7.10
   5  -4   6   95.49    7.20
  -5  -4  -6   89.79    5.00
   5  -4  -6  100.59    4.10
   5   4   6   96.29    7.40
  -5   4  -6   99.99    6.30
  -5  -4   6   90.29    7.70
   5  -4  -6   97.89    6.90
  -5  -4   6   98.69    5.90
   5  -4  -6   95.49    4.20
  -5   4  -6   97.29    8.40
   5  -5   6   73.39    7.00
   5   5  -6   71.29    7.40
  -5  -5  -6   70.79    4.90
  -5   5   6   63.59    8.00
  -5  -5   6   83.79    8.00
  -5   5  -6   54.89    7.90
  -5  -5   6   74.19    5.20
   5   5   6   74.19    7.20
   5  -5  -6   72.59    6.80
   5  -5  -6   72.69    4.40
  -5   5  -6   69.19    6.20
  -5   6   6  289.57   16.70
   5  -6   6  291.57   14.90
  -5  -6  -6  296.77   12.70
   5   6  -6  267.77   15.90
   5   6   6  266.37   14.80
  -5  -6   6  285.97   16.20
   5  -6  -6  280.77   14.50
  -5   6  -6  265.27   17.40
  -5   6  -6  280.17   14.10
   5  -6  -6  285.47   13.80
   5  -7   6   94.39    8.60
  -5  -7  -6   91.19    7.00
  -5   7   6  101.29   10.50
   5   7  -6   91.39   10.30
   5  -7  -6  101.59    9.00
  -5  -7   6   97.99   10.80
   5   7   6   92.29    8.80
  -5   7  -6   79.09   11.40
  -5   7  -6   95.29    9.00
   5   0   7  884.81   33.90
  -5   0   7  891.61   34.00
  -5   0   7  898.71   31.20
  -5   0  -7  865.71   32.50
  -5   0   7  888.21   31.30
  -5   0  -7  914.21   31.60
   5   0  -7  899.01   33.20
   5   1  -7   43.00    4.90
  -5  -1  -7   60.09    4.30
   5  -1   7   61.99    5.60
  -5   1   7   52.99    5.40
  -5  -1  -7   54.19    4.00
  -5  -1   7   43.90    4.00
  -5   1  -7   49.10    3.90
  -5  -1   7   45.50    4.90
   5  -1  -7   52.89    4.70
  -5   1  -7   49.30    5.10
   5   1   7   37.90    5.10
   5   2  -7  285.67   13.80
  -5   2   7  279.07   14.50
   5  -2   7  276.47   13.60
  -5  -2  -7  271.37   11.40
  -5  -2  -7  277.87   12.50
  -5   2  -7  308.67   12.20
  -5   2  -7  296.27   14.30
   5   2   7  287.07   14.10
  -5  -2   7  291.97   13.10
   5  -2  -7  294.27   12.70
  -5  -2   7  298.37   13.30
  -5  -3  -7  336.67   14.90
   5   3  -7  319.27   15.60
   5  -3   7  315.17   15.30
  -5  -3  -7  316.87   12.70
  -5   3   7  309.77   16.20
  -5   3  -7  347.67   14.00
  -5  -3   7  343.97   15.40
  -5  -3   7  336.27   14.50
   5  -3  -7  325.37   14.40
  -5   3  -7  346.77   16.70
   5   3   7  331.37   15.80
   5   4  -7  403.26   19.30
  -5  -4  -7  415.06   15.80
  -5   4   7  424.46   20.40
   5  -4   7  403.76   18.60
  -5  -4  -7  446.86   18.70
  -5  -4   7  431.66   17.40
  -5   4  -7  420.06   20.60
  -5   4  -7  422.56   17.50
   5  -4  -7  413.46   17.90
   5   4   7  409.36   19.20
  -5  -4   7  416.06   19.20
   5  -5   7  102.39    8.20
  -5   5   7  102.19    9.80
  -5  -5  -7  103.19    9.00
  -5  -5  -7  100.49    5.80
   5   5  -7   87.49    8.60
   5  -5  -7   96.19    7.90
  -5  -5   7  106.99    6.80
  -5   5  -7  104.69   10.20
   5   5   7  103.39    8.90
  -5  -5   7  112.29    9.40
  -5   5  -7  101.49    7.50
   5  -6   7   84.49    8.10
  -5  -6  -7   88.59    9.20
  -5  -6  -7   88.39    5.70
   5   6  -7   85.09    9.40
  -5   6   7   87.49   10.10
  -5  -6   7   80.49    9.20
  -5   6  -7   66.29    9.20
   5   6   7   80.69    8.20
   5  -6  -7   79.79    8.10
  -5   6  -7   92.39    7.70
  -5  -7  -7   81.69    9.30
  -5   7   7   84.99   10.70
   5   7  -7   67.79    9.40
   5  -7   7   69.99    8.10
  -5   7  -7   72.29   10.80
  -5  -7   7   85.59   10.60
   5  -7  -7   70.29    8.10
   5   7   7   77.99    9.10
  -5   0   8  133.79    6.60
  -5   0  -8  154.68    7.40
  -5   0   8  135.19    6.50
   5   0  -8  150.48    8.70
   5   0   8  157.48    9.50
  -5   0   8  140.89    9.10
  -5   0  -8  154.38    8.20
   5   1  -8  677.03   30.30
  -5   1   8  771.42   31.60
   5  -1   8  793.32   31.20
  -5  -1  -8  815.92   29.10
  -5  -1  -8  791.92   28.90
  -5   1  -8  827.22   30.80
   5  -1  -8  820.62   30.10
   5   1   8  809.92   31.60
  -5  -1   8  800.02   31.00
  -5   1  -8  819.82   29.20
  -5  -1   8  806.82   29.20
   5   2  -8   29.40    4.70
  -5  -2  -8   24.80    3.60
  -5  -2  -8   30.10    3.10
   5  -2   8   30.40    4.80
  -5   2   8   32.20    5.60
   5   2   8   21.30    4.60
  -5   2  -8   20.90    4.50
   5  -2  -8   18.90    3.60
  -5  -2   8   24.30    4.10
  -5   2  -8   27.50    3.50
  -5  -2   8   18.50    3.60
   5   3  -8  255.87   13.20
  -5  -3  -8  228.78   11.40
  -5   3   8  245.28   13.90
   5  -3   8  251.27   12.60
  -5  -3  -8  243.08    9.50
  -5   3  -8  208.48   13.00
   5   3   8  187.68   12.10
  -5  -3   8  192.18   11.70
  -5   3  -8  219.38   10.70
   5  -3  -8  213.38   11.20
  -5  -3   8  209.68   11.30
   5  -4   8   52.39    6.30
   5   4  -8   54.29    7.00
  -5   4   8   58.79    7.90
  -5  -4  -8   51.49    6.10
  -5  -4  -8   63.29    4.30
  -5   4  -8   60.69    7.60
  -5   4  -8   69.09    5.90
  -5  -4   8   64.49    7.40
   5   4   8   63.19    7.30
   5  -4  -8   61.89    6.50
  -5  -4   8   62.59    5.80
  -5   5   8   74.49    9.40
  -5  -5  -8   74.69    4.80
   5  -5   8   73.19    7.30
   5   5  -8   77.89    8.80
  -5  -5  -8   59.09    6.90
  -5  -5   8   63.89    7.90
  -5  -5   8   67.89    5.80
  -5   5  -8   63.39    8.70
  -5   5  -8   60.19    6.30
   5   5   8   63.59    7.90
   5  -5  -8   50.59    6.30
   5   6  -8    0.90    3.90
   5  -6   8    4.30    3.70
  -5  -6  -8    3.40    4.50
  -5   6   8    2.70    4.80
  -5  -6   8    5.80    4.80
   5   6   8    9.60    4.50
   5  -6  -8    3.00    3.70
  -5   6  -8    3.20    4.90
  -5   7   8   19.20    6.60
   5  -7   8   24.40    5.40
  -5  -7  -8   21.00    6.00
   5   7  -8   14.80    5.70
   5  -7  -8   17.90    5.40
  -5   7  -8   10.80    6.10
  -5  -7   8   22.70    6.40
   5   7   8   28.10    6.60
  -5   0   9    4.30    3.30
   5   0   9    6.10    3.30
  -5   0   9    5.30    1.80
   5   0  -9    5.20    2.90
  -5   0  -9    2.40    2.40
  -5   0   9    1.10    1.40
  -5   0  -9    4.10    2.20
  -5  -1  -9  358.66   15.00
  -5   1   9  332.07   17.40
   5  -1   9  374.06   17.40
  -5  -1  -9  344.87   14.70
   5   1  -9  311.87   16.10
   5  -1  -9  374.76   16.10
  -5  -1   9  368.26   14.90
  -5   1  -9  367.86   15.10
  -5  -1   9  362.76   17.00
  -5   1  -9  354.76   16.40
   5   1   9  359.36   17.30
  -5  -2  -9   38.30    3.80
   5  -2   9   34.80    5.10
   5   2  -9   37.70    5.40
  -5   2   9   25.80    5.10
  -5  -2  -9   28.50    4.00
   5  -2  -9   27.80    4.20
  -5  -2   9   28.20    4.70
  -5   2  -9   27.90    5.10
  -5  -2   9   29.20    4.40
   5   2   9   32.70    5.60
  -5   2  -9   27.50    3.90
   5   3  -9  158.08   10.50
   5  -3   9  156.68   10.30
  -5   3   9  137.89   10.80
  -5  -3  -9  132.79    8.70
  -5  -3  -9  141.29    7.10
   5  -3  -9  144.29    9.00
  -5   3  -9  138.39   10.70
  -5  -3   9  138.29    9.10
   5   3   9  129.29    9.90
  -5  -3   9  149.79    9.80
  -5   3  -9  149.39    8.60
  -5  -4  -9   63.49    4.40
  -5   4   9   55.89    8.30
  -5  -4  -9   59.19    6.60
   5  -4   9   62.19    7.10
   5   4  -9   63.49    7.80
  -5  -4   9   59.39    7.40
  -5   4  -9   70.59    6.30
   5  -4  -9   51.39    5.90
   5   4   9   65.99    8.30
  -5  -4   9   72.49    6.60
  -5   4  -9   63.09    8.20
   5  -5   9  169.48   11.30
   5   5  -9  159.48   12.10
  -5   5   9  186.08   13.90
  -5  -5  -9  169.98   11.30
  -5  -5   9  169.08   10.00
  -5   5  -9  169.08   12.20
  -5   5  -9  192.98   14.10
   5   5   9  167.18   12.30
  -5  -5   9  175.98   12.30
   5  -5  -9  152.18   10.70
  -5   6   9    7.40    5.80
   5   6  -9    1.60    4.30
  -5  -6  -9    1.10    4.40
   5  -6   9    3.90    4.00
   5   6   9    2.30    4.50
  -5   6  -9    2.70    5.30
  -5  -6   9    2.20    4.50
   5  -6  -9    6.80    4.40
  -5   0 -10  228.18   10.90
   5   0  10  212.08   13.10
  -5   0  10  227.48    9.70
  -5   0  10  221.38   13.40
  -5   0 -10  223.88   11.60
   5   0 -10  228.68   12.30
  -5   1  10  382.66   19.90
   5  -1  10  399.36   19.50
   5   1 -10  392.86   18.70
  -5  -1 -10  391.36   16.80
  -5  -1 -10  412.26   17.10
  -5  -1  10  392.46   16.70
   5   1  10  405.16   19.70
  -5  -1  10  411.96   19.40
  -5   1 -10  431.76   18.80
   5  -1 -10  420.36   18.30
  -5   1 -10  425.06   17.40
  -5  -2 -10  290.27   13.50
  -5  -2 -10  295.47   12.70
   5  -2  10  294.17   15.60
  -5   2  10  293.07   16.60
  -5  -2  10  284.67   13.80
   5   2  10  302.47   16.20
  -5  -2  10  295.27   15.30
  -5   2 -10  302.27   15.60
   5  -2 -10  300.67   14.30
  -5   2 -10  247.68   13.20
  -5  -3 -10   29.10    3.30
   5   3 -10   28.50    5.60
  -5  -3 -10   16.00    4.30
  -5   3  10   21.80    6.10
   5  -3  10   18.70    4.80
  -5   3 -10   12.70    5.10
   5  -3 -10   13.60    4.20
  -5   3 -10   17.30    3.70
   5   3  10   11.90    4.70
  -5  -3  10   14.40    4.30
  -5  -3  10   20.20    4.50
  -5  -4 -10  104.09    8.60
  -5   4  10   89.59   10.70
   5   4 -10  102.39    9.90
   5  -4  10  106.59    9.30
   5  -4 -10  100.09    8.60
  -5   4 -10  107.99   10.50
  -5  -4  10   98.69    9.30
  -5   4 -10  105.89    8.10
  -5  -4  10  115.59    8.60
   5   4  10  108.29   10.00
   5   5 -10   17.00    5.30
  -5  -5 -10   22.70    5.40
  -5   5  10   28.30    7.00
   5  -5  10   15.30    4.90
  -5   5 -10    6.70    5.10
   5  -5 -10   13.30    4.50
  -5  -5  10   16.60    4.10
  -5  -5  10   24.30    5.90
   5   5  10   10.30    5.10
  -5   6  10   62.39   10.20
  -5  -6 -10   68.49    8.10
   5  -6  10   71.99    8.70
   5   6 -10   66.29    9.10
  -5  -6  10   53.39    8.30
   5  -6 -10   55.89    7.40
  -5   6 -10   59.89   10.10
   5   6  10   70.49    9.60
  -5   0 -11  351.96   16.00
  -5   0 -11  316.67   14.80
   5   0 -11  346.77   16.70
  -5   0  11  314.97   17.40
   5   0  11  335.87   17.80
   5   1 -11    3.00    3.10
  -5  -1 -11    4.90    3.00
  -5  -1 -11    5.10    2.80
   5  -1  11    6.20    3.90
  -5   1  11    5.40    4.30
  -5   1 -11    1.90    2.80
   5  -1 -11    3.50    3.30
   5   1  11    0.80    3.60
  -5  -1  11    7.30    2.80
  -5  -1  11    4.10    3.90
  -5   1 -11    4.10    3.40
  -5  -2 -11  227.28   11.80
  -5  -2 -11  246.18   13.20
   5   2 -11  187.78   13.00
  -5   2  11  223.28   15.00
   5  -2  11  223.48   14.00
  -5  -2  11  246.08   12.40
   5  -2 -11  226.08   12.70
  -5   2 -11  259.47   14.60
  -5   2 -11  231.28   12.20
   5   2  11  246.38   14.90
  -5  -2  11  234.88   13.80
  -5   3  11  102.89   10.60
   5   3 -11   95.29    9.40
  -5  -3 -11  109.29    8.50
   5  -3  11  123.49   10.40
  -5   3 -11  126.19   11.20
  -5  -3  11  127.29    9.30
   5   3  11  120.39   10.90
   5  -3 -11  106.69    9.00
  -5   3 -11  114.49    8.40
  -5  -3  11  113.99    9.60
   5  -4  11   35.20    6.50
  -5  -4 -11   34.00    5.80
   5   4 -11   39.30    7.00
  -5   4  11   35.40    7.30
  -5  -4  11   36.40    6.10
  -5   4 -11   36.50    7.30
   5  -4 -11   38.80    5.90
   5   4  11   18.50    5.70
  -5  -4  11   39.40    5.90
  -5  -5 -11   -0.30    4.40
   5   5 -11   -0.90    4.00
   5  -5  11    0.10    3.80
  -5   5  11   -4.70    4.60
  -5   5 -11   -0.80    4.70
   5  -5 -11   -2.00    3.90
  -5  -5  11   -0.80    4.20
   5   5  11    7.10    5.10
  -5   0  12  117.09   10.60
  -5   0 -12  103.29    8.60
  -5   0 -12  108.49    7.90
   5   0  12   96.29    9.50
   5   0 -12  108.89    9.10
   5   1 -12   72.09    8.30
  -5  -1 -12   76.89    6.80
  -5   1  12   69.49    9.30
   5  -1  12   66.69    8.50
   5  -1 -12   55.19    6.90
   5   1  12   65.79    8.90
  -5  -1  12   52.59    7.80
  -5   1 -12   50.09    6.80
  -5   1 -12   70.29    6.60
  -5  -2 -12  172.38   10.50
   5   2 -12  184.88   12.40
   5  -2  12  162.58   12.50
  -5   2  12  154.18   12.90
  -5   2 -12  201.58   11.20
  -5  -2  12  179.68   12.60
  -5   2 -12  176.18   12.60
   5   2  12  168.78   12.80
  -5  -2  12  172.98   10.50
   5  -2 -12  174.38   11.40
  -5  -3 -12   -0.20    3.70
  -5   3  12    3.50    4.50
   5   3 -12    2.20    3.70
   5  -3  12    0.50    4.00
  -5   3 -12    4.00    4.60
   5   3  12    8.10    5.00
  -5  -3  12    2.50    4.20
  -5  -3  12    6.50    4.00
   5  -3 -12    3.90    4.10
   5   4 -12   23.20    6.00
  -5   4  12   23.10    7.40
  -5  -4 -12   22.20    5.20
   5  -4  12   15.10    5.30
  -5  -4  12   23.10    5.50
  -5   4 -12   21.70    6.70
   5   4  12   15.50    6.00
  -5  -4  12   14.60    4.80
   5  -4 -12   14.60    4.90
   5   0  13   -2.60    3.90
  -5   0  13    9.10    4.90
   5   0 -13   -1.40    3.20
  -5   0 -13    0.80    3.00
   5   1 -13   63.59    8.20
  -5  -1 -13   57.09    6.50
   5  -1  13   67.39    9.10
  -5   1  13   65.49    9.50
  -5   1 -13   72.49    8.30
  -5  -1  13   68.99    8.90
   5   1  13   62.99    9.10
   5  -1 -13   61.39    7.60
  -5   1 -13   77.79    7.30
  -5   2  13   58.69    9.00
   5  -2  13   66.49    8.90
  -5  -2 -13   63.19    7.00
   5   2 -13   61.49    8.20
  -5   2 -13   62.19    8.40
   5   2  13   76.39   10.20
  -5  -2  13   75.19    9.20
   5  -2 -13   62.49    7.70
  -5   3  13  124.79   13.80
   5  -3  13   95.79   10.50
   5   3 -13   93.79   10.70
  -5  -3 -13  101.29    8.90
  -5  -3  13  116.79   10.80
   5  -3 -13   91.69    9.20
  -5   3 -13  116.39   11.30
   5   3  13  120.69   12.00
  -5   0  14   24.70    6.80
   5   0 -14   11.60    4.60
   5   0  14   18.30    6.00
  -5   0 -14   16.20    4.40
   6   0   0 1433.36   49.40
   6   0   0 1393.86   48.80
  -6   0   0 1455.15   48.60
   6   0   0 1425.86   48.60
   6   0   0 1456.55   49.40
  -6   0   0 1443.96   48.70
   6  -1   0 3364.76  130.19
   6  -1   0 3963.40  129.29
  -6   1   0 4102.59  129.59
   6  -1   0 4016.10  128.79
  -6   1   0 3930.21  129.79
  -6   1   0 3929.61  130.49
  -6  -1   0 3918.01  129.89
  -6  -1   0 3871.31  129.19
  -6  -1   0 3837.02  129.29
   6   1   0 3703.93  128.99
   6   1   0 3879.41  129.99
  -6  -2   0   48.90    2.30
  -6   2   0   46.90    3.80
   6  -2   0   49.60    2.80
   6   2   0   50.69    2.20
  -6   2   0   48.70    4.30
  -6  -2   0   54.39    3.50
   6  -2   0   51.89    3.10
   6   2   0   54.89    4.40
   6  -2   0   51.89    5.00
   6  -2   0   50.49    3.40
   6  -3   0  235.48   10.00
   6   3   0  223.38   11.00
  -6   3   0  236.48   10.90
  -6  -3   0  222.98   10.10
  -6   3   0  240.98   11.20
  -6   4   0 2249.57   77.89
  -6  -4   0 2320.07   78.69
   6   4   0 2269.37   79.89
  -6  -4   0 2212.08   76.09
  -6   4   0 2309.07   79.49
  -6   5   0   25.30    3.60
  -6  -5   0   18.00    2.20
  -6   5   0   37.00    5.20
  -6  -5   0   27.90    2.30
   6   5   0   20.50    4.30
  -6  -5   0   26.10    4.20
   6  -5   0   18.30    4.20
  -6  -6   0  345.07   13.30
  -6   6   0  342.97   15.60
   6   6   0  334.77   17.50
  -6  -6   0  331.47   16.00
   6  -6   0  338.67   17.10
  -6   6   0  348.27   17.30
  -6  -7   0    1.90    3.70
   6  -7   0   -1.70    3.50
   6  -7   0   -3.80    2.90
   6   7   0    0.30    3.90
  -6   7   0    3.00    3.10
   6   8   0   15.40    5.70
  -6  -8   0   20.40    5.40
   6  -8   0   10.10    4.60
   6  -8   0    9.80    4.50
  -6   0  -1 1260.37   42.80
   6   0  -1 1256.27   43.20
   6   0   1 1242.38   42.90
  -6   0   1 1263.27   42.70
  -6   0   1 1220.08   43.60
  -6   0  -1 1292.47   43.00
   6   0   1 1269.67   43.70
   6   0  -1 1244.28   43.60
  -6   0   1 1312.97   43.20
   6   0  -1 1270.47   42.80
  -6   0  -1 1297.47   43.80
  -6   1   1  376.66   12.90
   6  -1   1  360.96   14.10
   6   1  -1  371.26   13.40
  -6  -1  -1  369.06   13.10
   6  -1   1  370.66   12.10
   6  -1   1  365.86   13.20
  -6   1   1  362.26   12.90
  -6  -1  -1  360.46   12.90
  -6   1   1  355.16   14.10
   6   1  -1  369.96   13.80
   6   1  -1  362.16   12.80
  -6  -1  -1  366.16   13.70
   6   1   1  344.87   13.60
  -6  -1   1  325.07   13.00
  -6   1  -1  336.47   12.10
   6  -1  -1  345.77   12.80
   6  -1  -1  352.36   12.60
   6   1   1  348.17   13.00
   6  -1  -1  334.97   13.90
  -6  -1   1  355.56   12.80
   6   1   1  343.07   12.90
  -6  -1   1  358.96   13.60
   6  -2   1 1116.49   36.20
  -6   2   1 1103.19   37.40
   6  -2   1 1049.09   38.20
  -6  -2  -1 1100.99   37.10
   6  -2   1 1123.89   36.50
  -6   2   1 1093.59   38.40
   6   2  -1 1091.29   38.20
  -6  -2  -1 1123.89   36.50
   6  -2   1 1113.69   37.70
  -6   2  -1  980.50   37.80
   6   2   1  993.90   37.90
   6   2   1 1010.20   36.40
  -6  -2   1 1019.20   37.40
   6  -2  -1 1025.60   36.60
   6  -2  -1 1061.49   36.90
  -6   3   1  704.43   26.50
  -6   3   1  715.13   25.50
   6  -3   1  706.33   24.70
  -6  -3  -1  647.14   24.80
   6  -3   1  692.83   26.20
  -6  -3  -1  700.63   23.80
   6   3  -1  699.93   26.30
   6   3   1  661.23   23.80
   6  -3  -1  706.23   26.20
  -6   3  -1  653.63   24.30
  -6   3  -1  667.23   26.10
   6  -3  -1  673.83   24.50
   6   3   1  655.33   26.10
  -6  -3   1  672.43   25.40
   6  -4   1  909.31   34.50
  -6  -4  -1  910.51   31.70
  -6   4   1  946.41   34.20
  -6   4   1  909.81   34.70
   6   4  -1  902.11   34.80
  -6  -4  -1  905.81   33.30
   6   4   1  927.01   32.00
  -6  -4   1  905.11   33.90
  -6   4  -1  927.51   34.90
   6  -4  -1  883.81   32.80
   6   4   1  886.01   34.60
  -6   4  -1  938.91   32.90
  -6   5   1  275.77   13.10
  -6   5   1  246.58   13.00
   6  -5   1  228.78   12.70
   6   5  -1  261.47   13.50
  -6  -5  -1  258.47   10.00
  -6  -5  -1  242.78   11.90
   6   5   1  229.38   10.20
  -6   5  -1  238.98   11.40
  -6  -5   1  253.77   12.50
   6   5   1  225.78   13.00
  -6   5  -1  244.98   13.20
  -6  -6  -1  154.68    9.90
   6   6  -1  150.88   10.90
   6  -6   1  141.09   10.30
  -6   6  -1  172.28   11.50
  -6  -6   1  157.38   10.20
  -6  -6   1  170.68    6.70
   6   6   1  162.58   11.30
  -6   6  -1  158.98    9.40
  -6  -7  -1  200.68   11.90
   6  -7   1  190.78   12.30
   6   7  -1  186.68   13.30
  -6   7  -1  193.38   11.50
  -6  -7   1  188.08   12.30
   6   7   1  198.98   13.50
   6  -7  -1  179.28   11.60
   6  -7  -1  208.58   13.40
   6  -8   1    5.10    4.50
  -6  -8  -1    3.90    4.40
   6   8  -1    8.90    5.00
   6  -8   1    2.70    4.00
   6  -8  -1   -0.60    3.40
   6  -8  -1   -2.30    3.70
   6  -8  -1    6.10    4.10
   6   8   1   -1.90    4.30
  -6   8  -1    0.60    3.40
  -6  -8   1    3.70    4.30
   6   0   2 1686.53   58.89
   6   0  -2 1804.72   59.79
   6   0   2 1835.12   59.29
  -6   0  -2 1710.13   59.29
   6   0   2 1722.23   59.99
  -6   0  -2 1741.03   58.99
  -6   0  -2 1768.92   60.19
  -6   0   2 1694.73   59.89
   6   0  -2 1729.43   59.89
  -6   0   2 1738.03   58.89
   6   0  -2 1743.43   58.99
  -6   0   2 1849.02   59.59
   6  -1   2 1143.39   40.70
   6   1  -2 1191.88   40.10
   6   1  -2 1182.58   40.50
   6   1  -2 1209.98   39.50
  -6  -1  -2 1206.58   40.10
  -6   1   2 1138.49   39.70
  -6  -1  -2 1175.38   39.40
  -6   1   2 1236.58   39.20
  -6   1   2 1184.58   40.90
  -6  -1  -2 1175.08   40.20
   6   1   2 1143.99   39.50
  -6  -1   2 1116.19   39.50
  -6  -1   2 1121.59   39.80
   6   1   2 1123.59   39.80
  -6   1  -2 1126.99   40.20
   6  -1  -2 1043.60   40.50
   6   1   2 1120.29   40.10
   6  -1  -2 1142.09   39.70
   6  -1  -2 1146.49   38.90
  -6  -2  -2   17.10    2.00
   6   2  -2   18.70    1.40
   6   2  -2   15.70    2.70
  -6   2   2   17.90    2.10
  -6   2   2   18.30    3.20
   6  -2   2   19.40    3.10
  -6   2   2   22.00    2.30
  -6  -2  -2   19.20    2.10
   6  -2   2   17.20    1.60
  -6   2  -2   22.20    3.30
   6   2   2   10.80    2.20
  -6  -2   2   15.70    1.50
   6   2   2   18.80    2.20
   6  -2  -2   16.60    2.10
   6   2   2   14.60    2.50
   6  -2  -2   17.80    1.80
  -6   2  -2   16.60    1.60
  -6  -2   2   14.50    2.50
  -6  -3  -2 2836.32   95.99
  -6  -3  -2 2776.62   96.29
   6  -3   2 2879.71   97.99
   6  -3   2 2828.72   95.99
  -6   3   2 2846.52   96.69
   6   3  -2 2780.32   97.89
  -6   3   2 2764.32   98.09
  -6  -3   2 2853.51   97.39
  -6   3  -2 2833.92   98.19
   6  -3  -2 2825.12   96.29
   6   3   2 2848.71   97.89
   6   3   2 2922.81   96.09
  -6   3  -2 2866.91   95.89
   6  -3  -2 2938.21   96.29
  -6  -4  -2   86.29    5.60
  -6   4   2   86.89    6.00
   6  -4   2   82.59    6.50
  -6   4   2   85.69    6.90
   6   4  -2   80.79    6.90
  -6  -4  -2   83.19    4.80
  -6   4  -2   94.59    7.40
   6   4   2   82.59    6.80
  -6  -4   2   93.29    6.70
   6  -4  -2   87.79    5.70
  -6   4  -2   82.99    5.30
   6   4   2   89.19    5.10
  -6  -5  -2  820.32   29.80
   6   5  -2  812.32   32.90
   6  -5   2  824.12   32.30
  -6   5   2  822.72   32.90
  -6  -5  -2  822.62   30.90
  -6   5   2  847.52   31.90
   6  -5  -2  819.82   30.90
  -6   5  -2  799.32   33.10
  -6  -5   2  823.22   32.10
  -6   5  -2  819.52   30.70
   6   5   2  843.62   30.20
   6   5   2  845.02   32.90
   6  -6   2  202.48   12.40
   6   6  -2  220.28   13.40
  -6  -6  -2  227.38   11.70
  -6   6   2  211.58   13.20
  -6   6  -2  229.78   11.60
   6  -6  -2  213.08   11.60
  -6   6  -2  211.88   13.80
   6   6   2  225.48   10.50
   6  -6  -2  217.58   11.60
  -6  -6   2  226.38   12.80
   6   6   2  240.88   13.80
  -6   7   2   11.80    4.60
  -6  -7  -2    2.30    3.70
   6  -7   2    7.50    3.90
   6   7  -2   11.00    4.70
  -6   7  -2   18.20    4.40
   6  -7  -2   14.90    4.20
  -6   7  -2   15.00    5.50
   6   7   2   22.80    5.50
  -6  -7   2   15.30    4.70
   6  -7  -2   15.40    4.00
   6  -8   2   -0.40    4.10
   6   8  -2    2.20    4.60
   6  -8   2   -0.10    3.60
  -6  -8  -2    0.90    3.70
  -6   8  -2    9.20    3.80
  -6  -8   2   -2.10    3.80
   6  -8  -2    3.50    4.40
   6  -8  -2    3.50    3.50
   6  -8  -2    1.90    3.50
   6   8   2    4.40    4.50
  -6   0  -3  451.85   16.70
   6   0  -3  420.76   16.10
   6   0   3  434.16   16.40
  -6   0  -3  417.96   15.30
  -6   0  -3  408.56   14.90
  -6   0  -3  412.96   15.60
   6   0  -3  426.46   16.20
   6   0   3  442.36   15.50
   6   0  -3  431.06   15.30
  -6   0   3  429.26   15.00
  -6   0   3  406.16   16.20
  -6   1   3  666.43   23.90
   6   1  -3  673.13   23.40
  -6  -1  -3  672.03   23.10
   6   1  -3  684.73   22.60
  -6  -1  -3  666.63   23.20
  -6  -1  -3  666.23   22.20
  -6   1   3  695.73   21.60
   6  -1   3  648.34   23.60
  -6   1   3  606.54   23.30
   6   1  -3  696.43   23.00
   6  -1  -3  587.54   21.40
   6   1   3  619.24   22.20
   6  -1  -3  607.84   22.60
   6   1   3  583.04   22.90
   6   1   3  575.24   22.60
  -6  -1   3  587.74   22.50
  -6   1  -3  565.64   23.00
  -6  -1   3  590.84   22.50
  -6   1  -3  606.34   21.30
  -6  -2  -3   88.39    5.00
   6  -2   3   94.39    6.10
   6   2  -3   87.79    5.80
   6  -2   3   88.79    3.70
  -6   2   3   99.69    4.50
  -6   2   3   90.39    6.30
  -6  -2  -3   91.19    4.50
   6   2  -3   97.89    4.30
  -6   2  -3   86.29    4.00
   6  -2  -3   87.19    5.00
  -6  -2   3   89.69    4.40
   6   2   3   94.49    5.20
  -6   2  -3   82.39    5.80
   6   2   3   89.09    5.70
  -6  -2   3   89.49    5.50
   6  -2  -3   97.49    3.90
  -6   3   3 1787.72   60.39
   6   3  -3 1901.91   59.49
  -6  -3  -3 1783.62   60.29
   6  -3   3 1765.32   62.09
  -6  -3  -3 1801.42   60.79
   6  -3   3 1854.61   59.99
   6   3  -3 1782.52   62.29
  -6   3   3 1832.62   62.79
   6   3   3 1728.33   60.79
  -6   3  -3 1703.83   59.99
  -6  -3   3 1707.13   61.59
   6   3   3 1674.33   61.79
   6  -3  -3 1741.53   59.89
  -6   3  -3 1651.13   62.49
  -6  -3   3 1717.03   59.29
   6  -3  -3 1717.13   60.59
  -6  -4  -3   97.79    5.90
   6   4  -3   99.99    7.60
   6  -4   3   98.39    6.50
   6  -4   3  109.29    7.50
  -6   4   3  106.59    7.90
  -6   4   3  107.29    6.40
  -6  -4   3  104.79    4.40
   6  -4  -3   96.89    6.30
  -6   4  -3  107.09    6.00
   6   4   3  111.59    6.20
  -6  -4   3  102.59    4.60
  -6   4  -3  105.59    8.20
  -6  -4   3  104.79    7.40
   6   4   3   96.39    7.40
   6  -5   3   77.19    6.90
   6   5  -3   72.09    7.20
  -6  -5  -3   68.89    5.70
  -6   5   3   68.09    7.10
  -6  -5   3   63.89    3.30
   6  -5  -3   59.69    5.90
  -6  -5   3   69.39    6.80
   6   5   3   60.89    5.30
  -6  -5   3   66.19    3.40
  -6   5  -3   53.29    6.90
   6  -5  -3   65.79    5.40
   6   5   3   72.49    7.30
  -6   5  -3   71.79    5.50
   6  -6   3  194.78   11.70
  -6   6   3  185.68   12.40
  -6  -6  -3  180.48   10.20
   6   6  -3  182.68   12.60
   6  -6  -3  189.58   10.30
   6   6   3  211.28   12.70
   6   6   3  195.28   10.20
  -6   6  -3  195.88   13.30
  -6   6  -3  186.48   10.50
  -6  -6   3  189.98   12.10
   6  -6  -3  191.58   10.90
   6  -7   3    3.30    3.50
   6   7  -3    3.10    4.30
  -6   7   3    5.30    4.40
  -6  -7  -3    7.90    3.60
  -6   7  -3    6.00    4.90
   6   7   3    5.30    4.30
   6  -7  -3    3.80    3.00
  -6  -7   3   -0.30    4.00
   6  -7  -3    4.20    3.40
  -6   7  -3    5.60    3.50
   6   8  -3    8.30    5.00
   6  -8   3    6.70    4.10
  -6  -8  -3    4.90    3.60
  -6   8   3    9.10    4.90
   6  -8   3    1.10    4.40
   6   8   3    8.20    4.90
  -6  -8   3    8.20    4.90
   6  -8  -3    7.00    4.00
   6  -8  -3    8.00    3.60
  -6   8  -3    9.40    4.10
  -6   0  -4  347.57   13.40
   6   0  -4  341.47   12.80
  -6   0   4  337.07   14.10
  -6   0   4  352.86   12.60
  -6   0  -4  344.07   12.60
   6   0  -4  361.96   14.00
   6   0   4  335.67   14.10
   6   0   4  365.16   13.70
  -6   0  -4  348.97   13.10
   6  -1   4   65.29    3.10
   6  -1   4   62.29    4.90
   6   1  -4   64.29    4.80
   6   1  -4   66.59    4.20
   6   1  -4   70.49    4.40
  -6   1   4   65.99    2.80
  -6  -1  -4   59.39    3.70
  -6  -1  -4   62.99    4.40
  -6   1   4   57.89    5.10
  -6  -1   4   72.99    4.30
  -6   1  -4   73.19    3.30
   6   1   4   75.09    3.70
  -6  -1   4   71.89    4.40
   6   1   4   68.29    4.80
   6  -1  -4   70.69    4.40
   6  -1  -4   70.79    3.00
  -6   1  -4   68.29    4.80
   6   2  -4 4822.32  168.68
   6   2  -4 4771.02  167.18
   6  -2   4 4891.11  166.18
  -6   2   4 4906.81  169.38
   6  -2   4 4992.90  168.98
  -6  -2  -4 4844.02  166.78
  -6   2   4 4873.21  166.28
  -6  -2   4 5169.48  167.48
   6   2   4 5132.99  168.48
   6   2   4 5164.58  168.48
   6  -2  -4 5042.50  165.78
  -6   2  -4 5115.19  169.28
   6  -2  -4 5031.80  167.68
  -6  -2   4 5081.99  168.28
  -6   2  -4 5071.09  166.58
   6  -3   4  884.01   30.20
  -6   3   4  840.42   33.10
   6   3  -4  860.71   30.40
  -6  -3  -4  857.61   30.50
   6  -3   4  854.11   32.60
   6   3  -4  860.91   32.70
  -6  -3   4  883.01   32.40
   6   3   4  861.41   32.40
  -6  -3   4  871.51   30.40
  -6   3  -4  864.31   33.40
   6  -3  -4  889.01   29.90
   6   3   4  873.11   31.80
   6  -3  -4  852.01   31.30
  -6   3  -4  868.81   30.50
   6   4  -4  475.55   21.40
   6   4  -4  531.25   18.60
   6  -4   4  534.85   19.90
  -6  -4  -4  498.35   19.10
   6  -4   4  505.75   21.20
  -6   4   4  503.15   21.80
   6  -4  -4  511.65   19.00
  -6  -4   4  492.45   18.30
   6   4   4  509.95   20.20
   6  -4  -4  498.45   19.90
  -6  -4   4  505.25   21.10
   6   4   4  503.55   21.30
   6  -4  -4  527.15   18.90
  -6   4  -4  512.55   19.40
  -6   4  -4  465.85   22.10
   6   5  -4  167.98   11.10
  -6  -5  -4  172.68    9.10
   6  -5   4  177.98   10.80
  -6   5   4  186.88   11.70
  -6  -5   4  184.18    7.60
   6   5   4  191.08    9.90
  -6  -5   4  171.38    7.80
   6  -5  -4  188.38   10.00
  -6   5  -4  179.18    9.50
   6  -5  -4  201.18    9.20
  -6   5  -4  174.98   12.10
   6   5   4  191.58   11.40
  -6  -5   4  209.68   11.60
  -6   6   4  293.77   16.30
  -6  -6  -4  291.37   13.40
   6   6  -4  292.77   16.30
   6  -6   4  321.47   15.50
   6  -6  -4  281.57   14.30
  -6  -6   4  306.67   16.20
   6   6   4  291.27   15.90
   6  -6  -4  300.87   13.50
  -6   6  -4  290.17   14.00
   6   6   4  292.97   14.20
  -6   6  -4  274.87   16.90
   6   7  -4   13.60    5.00
  -6   7   4   12.90    5.20
  -6  -7  -4   12.80    3.80
   6  -7   4   18.90    4.70
   6  -7  -4   19.30    4.10
   6   7   4   23.00    5.70
  -6   7  -4   17.10    4.30
  -6   7  -4   13.40    5.80
  -6  -7   4   20.30    5.70
   6  -7  -4   16.70    4.60
   6  -8   4    6.60    4.10
  -6  -8  -4    4.80    3.60
   6   8  -4    3.00    4.50
  -6   8   4   -1.30    4.50
   6  -8   4   -1.50    4.50
   6  -8  -4    6.10    4.30
  -6  -8   4    0.90    4.10
   6   8   4   10.60    5.20
  -6   0   5 1269.37   42.40
  -6   0  -5 1249.28   42.60
  -6   0   5 1214.88   43.90
  -6   0  -5 1191.28   42.80
  -6   0  -5 1245.18   42.00
   6   0  -5 1177.48   43.40
  -6   0   5 1236.18   41.80
   6   0   5 1227.48   43.90
  -6  -1  -5  488.95   18.20
  -6   1   5  515.95   20.40
   6  -1   5  525.55   20.10
   6   1  -5  552.34   20.10
   6  -1   5  522.15   17.80
  -6  -1  -5  518.65   18.60
   6   1   5  490.45   19.80
  -6  -1   5  490.95   19.30
   6  -1  -5  508.15   19.10
  -6   1  -5  436.36   17.80
  -6   1  -5  497.45   19.60
  -6  -1   5  492.15   19.40
  -6  -1   5  486.35   18.70
   6  -2   5 1641.24   57.59
  -6   2   5 1672.23   58.29
   6   2  -5 1572.34   56.19
  -6  -2  -5 1619.24   56.49
  -6  -2  -5 1609.54   55.29
   6  -2   5 1679.43   54.79
   6   2  -5 1677.53   57.69
  -6   2  -5 1597.24   55.29
   6  -2  -5 1579.54   56.39
   6   2   5 1655.73   57.39
  -6   2  -5 1626.64   57.89
  -6  -2   5 1596.94   56.79
  -6  -2   5 1589.04   56.29
   6   3  -5   86.09    5.00
   6  -3   5   75.69    6.40
  -6  -3  -5   75.49    4.50
   6  -3   5   77.99    4.20
  -6   3   5   77.29    7.00
   6   3  -5   73.69    6.40
   6  -3  -5   87.99    5.70
  -6  -3   5   85.19    6.40
   6  -3  -5   80.49    3.60
  -6   3  -5   85.69    7.20
   6   3   5   89.39    6.10
   6   3   5   83.49    6.30
  -6   3  -5   90.69    4.90
  -6  -3   5   83.79    5.00
   6  -3  -5   83.59    3.40
  -6   4   5  112.19    8.80
   6  -4   5  110.59    7.80
  -6  -4  -5  116.39    6.00
   6   4  -5  104.59    8.10
   6   4  -5  106.49    5.90
  -6   4  -5  109.79    6.40
   6  -4  -5  116.89    7.30
  -6  -4   5  102.99    5.70
   6  -4  -5  114.19    5.30
   6  -4  -5  118.49    5.50
   6   4   5  119.19    8.10
  -6   4  -5  116.89    9.20
   6   4   5  121.59    7.70
  -6  -4   5  104.79    7.80
  -6   5   5   10.40    4.40
   6  -5   5    9.60    3.60
   6   5  -5    7.90    3.80
  -6  -5  -5    7.90    2.60
  -6   5  -5    5.20    2.60
   6  -5  -5    8.10    3.20
   6   5   5    5.20    3.10
  -6   5  -5    1.60    3.40
  -6  -5   5    9.80    3.70
   6   5   5    5.30    3.30
   6  -5  -5    6.20    2.20
  -6  -5   5    7.00    1.80
   6  -6   5  307.57   15.50
  -6  -6  -5  286.27   13.10
   6   6  -5  275.17   16.20
  -6   6   5  279.07   16.40
  -6   6  -5  286.07   13.90
   6   6   5  288.37   15.90
  -6   6  -5  271.77   17.20
   6   6   5  272.67   14.40
   6  -6  -5  295.57   14.40
   6  -6  -5  299.07   12.90
  -6  -6   5  281.17   15.90
   6   7  -5   56.09    8.10
   6  -7   5   61.39    7.40
  -6   7   5   59.89    8.40
  -6  -7  -5   64.39    6.30
   6   7   5   71.59    8.70
   6  -7  -5   61.39    7.00
   6   7   5   66.59    8.70
  -6   7  -5   60.09    9.60
  -6  -7   5   59.79    8.30
  -6   7  -5   59.99    6.70
  -6   8   5   25.60    6.90
   6   8  -5   20.90    6.20
   6  -8   5   16.80    5.20
  -6  -8  -5   22.90    4.60
   6  -8   5   10.50    6.00
   6   8   5   22.90    6.30
   6  -8  -5   16.40    5.00
  -6  -8   5   10.30    5.40
  -6   0   6  243.98   10.00
  -6   0   6  248.48   11.90
   6   0   6  240.78   11.70
   6   0  -6  230.08   11.20
  -6   0   6  239.58    9.50
  -6   0  -6  257.37   11.40
  -6   0  -6  251.67    9.90
  -6   0  -6  253.97   10.80
  -6   1   6  747.63   27.90
   6  -1   6  715.73   27.20
  -6  -1  -6  721.73   25.40
   6  -1   6  719.23   24.90
  -6  -1  -6  713.13   25.40
   6   1  -6  756.92   27.20
   6   1   6  662.13   27.00
  -6   1  -6  657.73   26.60
   6  -1  -6  689.33   26.20
  -6  -1   6  682.53   26.70
  -6  -1   6  675.73   25.60
  -6  -2  -6  227.28   10.30
  -6  -2  -6  228.28    9.20
   6  -2   6  235.68    8.80
   6  -2   6  239.38   11.50
   6   2  -6  232.58   11.50
  -6   2   6  229.08   11.90
   6  -2  -6  216.78   10.30
  -6  -2   6  213.38   10.60
   6   2   6  209.68   11.10
  -6  -2   6  209.38   10.30
  -6   2  -6  219.58   11.60
  -6   2  -6  216.18    9.30
   6  -3   6   24.40    2.60
  -6  -3  -6   21.90    2.60
  -6  -3  -6   19.60    3.80
  -6   3   6   25.80    4.60
   6  -3   6   21.40    4.00
   6   3  -6   19.50    4.00
  -6   3  -6   30.50    5.00
   6   3   6   35.20    4.70
  -6   3  -6   40.00    3.60
   6  -3  -6   29.90    3.60
  -6  -3   6   35.80    3.80
  -6  -3   6   42.80    5.10
  -6   4   6   36.20    6.00
  -6  -4  -6   38.20    3.70
   6   4  -6   36.50    5.70
   6  -4   6   41.50    5.30
   6   4   6   45.00    5.50
  -6  -4   6   38.90    5.40
   6  -4  -6   45.50    2.50
  -6   4  -6   43.90    4.30
  -6   4  -6   36.00    6.00
   6  -4  -6   33.10    4.30
   6  -4  -6   42.60    2.40
  -6  -4   6   42.00    3.90
   6   5  -6  260.67   14.80
   6  -5   6  284.67   14.40
  -6   5   6  282.67   15.70
  -6  -5  -6  294.57   11.80
  -6   5  -6  269.17   12.70
  -6  -5   6  265.57   11.60
   6   5   6  259.37   13.80
   6  -5  -6  276.27   10.80
   6  -5  -6  272.97   13.50
  -6  -5   6  252.97   14.50
  -6   5  -6  270.77   16.20
   6  -6   6   96.49    8.50
  -6  -6  -6  104.99    6.80
  -6   6   6   88.09    9.70
   6   6  -6  105.59    9.60
  -6  -6   6   97.89    9.70
   6  -6  -6   99.19    8.50
  -6   6  -6   94.29   11.10
  -6   6  -6   96.79    7.70
   6   6   6  105.69    9.20
   6   6   6   98.69    8.70
  -6   7   6  112.49   11.40
  -6  -7  -6  107.89    7.50
   6   7  -6   94.59   10.90
   6  -7   6   82.19    8.80
  -6   7  -6   72.89   10.40
  -6  -7   6  105.89   11.10
   6   7   6   92.19    8.70
   6  -7  -6  107.29    9.20
  -6   0  -7  112.89    5.60
   6   0   7   97.69    7.20
  -6   0   7  118.19    7.60
  -6   0   7  105.49    5.40
   6   0  -7  102.49    6.90
  -6   0   7  106.39    5.10
  -6   0  -7   97.39    6.20
  -6  -1  -7  857.61   30.40
  -6  -1  -7  864.71   30.50
  -6   1   7  861.01   33.10
   6   1  -7  850.61   32.30
   6  -1   7  857.41   32.50
  -6  -1   7  836.32   30.60
  -6   1  -7  813.32   30.20
  -6  -1   7  823.22   32.10
   6  -1  -7  863.81   31.50
  -6   1  -7  864.61   32.00
   6   1   7  838.62   32.50
  -6   2   7  121.09    8.70
   6  -2   7  125.69    5.80
   6  -2   7  117.79    8.10
  -6  -2  -7  123.89    6.10
   6   2  -7  134.89    8.50
  -6  -2  -7  132.39    7.20
   6  -2  -7  133.19    7.50
  -6  -2   7  121.49    7.40
  -6   2  -7  113.29    8.20
   6   2   7  118.19    8.20
  -6  -2   7  120.79    7.60
  -6   2  -7  119.69    6.40
   6  -3   7  378.16   17.30
  -6   3   7  372.16   18.50
  -6  -3  -7  400.66   16.70
   6   3  -7  390.56   17.80
  -6  -3  -7  380.26   14.70
  -6  -3   7  379.86   16.30
  -6  -3   7  383.66   17.10
   6   3   7  381.66   17.60
   6  -3  -7  380.86   16.30
  -6   3  -7  373.36   18.40
  -6   3  -7  401.96   15.60
  -6  -4  -7   87.29    4.90
  -6  -4  -7   67.39    7.10
  -6   4   7   89.59    8.80
   6   4  -7   82.09    7.60
   6  -4   7   80.89    7.20
  -6  -4   7   76.89    7.30
  -6  -4   7   75.39    5.60
   6   4   7   67.09    7.20
  -6   4  -7   75.99    5.70
   6  -4  -7   67.19    6.40
  -6   4  -7   67.49    8.00
  -6   5   7  190.78   13.40
   6  -5   7  206.38   12.10
  -6  -5  -7  194.88    9.10
   6   5  -7  195.78   12.60
  -6  -5  -7  194.98   12.10
   6   5   7  199.78   12.10
  -6  -5   7  192.88    9.70
  -6   5  -7  201.08   13.90
  -6   5  -7  197.98   10.50
  -6  -5   7  205.98   12.60
   6  -5  -7  198.78   11.20
  -6   6   7   81.59    9.90
  -6  -6  -7   88.19    6.00
   6   6  -7   89.49    9.80
  -6  -6  -7   81.49    8.80
   6  -6   7   82.49    8.30
   6   6   7   88.99    8.70
   6  -6  -7   80.69    8.00
  -6   6  -7   88.09   10.90
  -6  -6   7   96.19    9.70
  -6  -7  -7   13.90    5.10
  -6  -7  -7   16.50    5.70
   6  -7   7   20.30    5.00
   6   7  -7   14.10    5.40
  -6   7   7   15.80    5.90
   6  -7  -7    6.90    4.40
   6   7   7   17.50    5.20
  -6   7  -7    2.80    5.10
  -6  -7   7   12.00    5.40
  -6   0  -8  420.36   17.50
  -6   0   8  432.26   15.70
   6   0  -8  415.36   18.10
   6   0   8  401.96   18.60
  -6   0  -8  447.16   16.50
  -6   0   8  407.16   15.80
  -6   0   8  419.06   18.90
   6  -1   8  271.77   14.20
  -6   1   8  292.07   14.80
  -6  -1  -8  286.07   12.20
  -6  -1  -8  286.87   12.40
   6   1  -8  246.68   13.60
   6   1   8  288.77   14.50
   6  -1  -8  305.37   13.50
  -6   1  -8  301.37   12.30
  -6  -1   8  294.37   12.40
  -6   1  -8  305.07   14.00
  -6  -1   8  305.37   14.30
  -6   2   8  519.55   23.70
  -6  -2  -8  543.55   21.00
   6   2  -8  533.85   22.80
  -6  -2  -8  528.05   20.10
   6  -2   8  545.35   22.80
  -6  -2   8  524.35   22.10
  -6   2  -8  543.45   20.70
  -6  -2   8  531.55   21.50
   6   2   8  528.85   22.90
  -6   2  -8  545.45   23.10
   6  -2  -8  544.95   21.50
   6  -3   8   18.50    4.30
  -6  -3  -8   15.80    3.70
   6   3  -8   25.70    5.00
  -6   3   8   16.00    4.50
  -6  -3  -8   17.30    2.60
  -6  -3   8   14.30    3.80
  -6   3  -8    8.10    4.10
   6   3   8   14.60    4.10
   6  -3  -8   17.10    3.60
  -6   3  -8   17.10    3.00
  -6  -3   8   18.40    3.50
   6  -4   8  198.28   11.70
   6   4  -8  200.38   12.50
  -6  -4  -8  185.98    8.60
  -6  -4  -8  198.38   11.30
  -6   4   8  194.38   13.30
  -6   4  -8  210.88   13.60
  -6   4  -8  195.48   10.10
   6   4   8  175.58   11.80
  -6  -4   8  199.88   11.90
  -6  -4   8  183.98   10.20
   6  -4  -8  190.38   10.80
  -6   5   8    2.20    4.60
  -6  -5  -8    1.30    2.10
  -6  -5  -8    2.00    4.10
   6  -5   8   -0.40    3.20
   6   5  -8    3.90    3.90
  -6   5  -8    3.00    4.40
  -6   5  -8    2.50    2.80
  -6  -5   8    0.50    3.70
  -6  -5   8   -0.30    2.30
   6   5   8    0.60    3.40
   6  -5  -8   -1.70    3.20
  -6   6   8   25.40    6.70
   6   6  -8   44.60    7.60
   6  -6   8   37.10    6.10
  -6  -6  -8   38.30    6.70
   6   6   8   37.70    6.60
  -6   6  -8   26.60    7.20
  -6  -6   8   40.20    7.00
   6  -6  -8   46.10    6.40
   6  -7   8   77.29    8.70
   6   7  -8   78.89   10.30
  -6  -7  -8   73.99    8.90
  -6   7   8   61.49    9.70
  -6   7  -8   68.49   10.60
   6   7   8   78.99    9.70
   6  -7  -8   71.79    8.10
  -6  -7   8   79.49   10.20
   6   0   9  494.05   22.20
   6   0  -9  520.75   21.40
  -6   0   9  503.65   18.50
  -6   0   9  494.55   19.30
  -6   0  -9  506.25   19.40
  -6   0   9  470.35   22.00
  -6   0  -9  508.85   20.60
   6   1  -9   23.80    4.40
   6  -1   9   26.40    4.90
  -6  -1  -9   21.60    3.40
  -6  -1  -9   29.90    3.80
  -6   1   9   27.70    5.40
  -6  -1   9   34.10    5.30
   6   1   9   37.70    5.70
  -6   1  -9   28.80    4.70
   6  -1  -9   25.30    4.30
  -6   1  -9   28.70    3.70
  -6  -1   9   26.50    3.50
  -6  -2  -9  106.49    6.80
  -6   2   9  105.19    9.30
  -6  -2  -9  103.29    6.00
   6  -2   9  103.09    8.30
   6   2  -9  102.79    8.10
   6   2   9   92.19    8.40
  -6  -2   9   85.49    6.70
   6  -2  -9   79.29    6.90
  -6   2  -9   87.79    6.20
  -6  -2   9   97.69    7.70
  -6   2  -9   83.39    8.00
  -6   3   9   73.09    8.80
   6   3  -9   65.59    7.70
   6  -3   9   69.59    7.30
  -6  -3  -9   68.99    4.80
  -6  -3  -9   63.69    6.60
  -6   3  -9   75.89    5.80
  -6   3  -9   70.79    8.40
   6  -3  -9   69.89    6.60
  -6  -3   9   69.29    6.60
  -6  -3   9   60.99    6.80
   6   3   9   63.69    7.80
  -6  -4  -9   59.69    4.50
  -6   4   9   55.69    7.90
   6  -4   9   61.09    7.30
  -6  -4  -9   59.99    6.60
   6   4  -9   68.99    8.10
  -6   4  -9   49.70    8.10
  -6  -4   9   57.59    6.30
  -6   4  -9   53.19    5.70
   6  -4  -9   56.59    6.40
  -6  -4   9   62.89    7.30
   6   4   9   52.89    7.30
   6   5  -9    0.90    3.70
  -6   5   9    1.90    4.70
   6  -5   9    2.90    3.70
  -6  -5  -9    6.00    4.20
  -6  -5   9    4.50    2.80
  -6   5  -9    4.20    4.80
   6   5   9    3.90    4.10
  -6  -5   9    1.30    3.90
   6  -5  -9    2.60    3.70
   6   6  -9   66.49    9.30
  -6  -6  -9   51.79    7.40
  -6   6   9   76.19   10.40
   6  -6   9   75.89    8.60
   6  -6  -9   58.69    7.20
   6   6   9   60.39    8.50
  -6   6  -9   70.19   10.10
  -6  -6   9   65.99    8.90
  -6   0  10  451.65   20.90
   6   0  10  418.66   20.40
  -6   0  10  431.66   16.40
  -6   0 -10  429.26   17.70
   6   0 -10  445.26   19.60
  -6   0 -10  428.46   18.80
   6  -1  10  129.39    9.80
  -6  -1 -10  124.09    7.40
   6   1 -10  115.39    9.00
  -6  -1 -10  115.09    7.60
  -6   1  10  111.89   10.00
  -6  -1  10  120.89    9.50
   6  -1 -10  140.79    9.00
  -6   1 -10  123.59    7.50
   6   1  10  119.89    9.60
  -6  -1  10  120.89    7.30
  -6   1 -10  121.39    9.00
   6   2 -10   94.29    8.60
  -6   2  10  110.39   10.20
  -6  -2 -10  110.29    6.90
   6  -2  10  117.09    9.40
  -6  -2 -10  110.99    7.60
  -6  -2  10  100.59    8.70
   6  -2 -10  100.29    8.00
  -6  -2  10  103.59    7.60
  -6   2 -10   91.59    7.00
   6   2  10  108.39    9.50
  -6   2 -10  103.89    9.20
  -6  -3 -10  185.88   10.50
   6  -3  10  191.68   12.40
   6   3 -10  172.58   12.30
  -6   3  10  165.18   13.20
  -6  -3 -10  181.28    9.10
  -6  -3  10  179.98   11.30
   6  -3 -10  183.68   10.90
  -6   3 -10  184.58   13.10
  -6   3 -10  192.68   10.30
  -6  -3  10  195.38   11.40
   6   3  10  201.58   13.00
   6   4 -10   -2.30    3.40
   6  -4  10    2.40    3.60
  -6   4  10   -0.20    4.00
  -6  -4 -10    0.10    3.50
  -6  -4  10   -2.30    3.30
   6  -4 -10   -2.40    3.50
   6   4  10   -1.60    3.60
  -6  -4  10   -1.30    2.70
  -6   4 -10    1.10    4.20
   6   5 -10   24.90    6.40
  -6   5  10   32.70    7.80
  -6  -5 -10   23.60    5.50
   6  -5  10   21.90    5.40
   6   5  10   22.30    5.90
  -6   5 -10   27.70    7.00
  -6  -5  10   21.90    5.70
  -6  -5  10   16.20    6.30
   6  -5 -10   24.60    5.40
  -6  -6 -10   39.50    6.70
   6  -6 -10   32.60    6.30
  -6   0  11    7.00    4.10
  -6   0 -11   -0.90    2.40
  -6   0 -11   -0.90    2.80
   6   0 -11    4.20    3.20
   6   0  11    8.60    4.50
  -6   1  11  415.56   20.60
  -6  -1 -11  381.66   16.90
  -6  -1 -11  378.96   16.50
   6  -1  11  388.66   19.60
   6   1 -11  380.56   18.90
   6  -1 -11  393.96   18.40
  -6  -1  11  382.06   16.10
   6   1  11  357.36   19.20
  -6   1 -11  396.76   17.00
  -6  -1  11  377.56   19.30
  -6   1 -11  368.96   18.40
   6  -2  11    1.20    3.90
   6   2 -11   -0.80    3.10
  -6  -2 -11   -0.20    2.50
  -6  -2 -11    6.40    3.20
  -6   2  11    0.20    4.30
  -6  -2  11    0.20    3.60
  -6   2 -11   -2.70    3.70
  -6  -2  11   -0.30    2.90
   6  -2 -11   -2.00    3.40
  -6   2 -11    0.60    2.50
   6   2  11   -0.50    4.10
  -6  -3 -11   42.00    5.70
  -6   3  11   35.10    7.60
   6  -3  11   39.20    6.90
   6   3 -11   29.20    6.20
  -6  -3  11   57.59    6.80
   6  -3 -11   45.70    6.20
  -6  -3  11   46.60    6.70
  -6   3 -11   54.69    8.10
   6   3  11   46.50    7.50
  -6   3 -11   53.49    6.50
   6  -4  11   27.80    6.00
  -6  -4 -11   35.40    5.70
   6   4 -11   45.70    7.60
  -6   4  11   45.10    8.50
  -6  -4  11   49.00    6.80
   6  -4 -11   34.60    5.70
  -6   4 -11   51.29    8.20
  -6  -4  11   45.00    6.40
   6   4  11   49.00    7.60
  -6  -5 -11   45.00    6.70
   6   5 -11   55.19    8.70
  -6   5  11   59.79   10.30
   6  -5  11   48.90    7.50
   6  -5 -11   42.50    6.60
  -6   5 -11   58.39    9.60
   6   5  11   43.40    7.90
  -6  -5  11   53.09    7.90
  -6   0  12   34.60    6.90
   6   0 -12   43.50    6.40
   6   0  12   32.80    6.10
  -6   0 -12   30.90    4.60
  -6   0 -12   32.70    5.40
   6  -1  12   83.39    9.80
  -6  -1 -12   82.59    7.20
  -6   1  12   94.49   10.70
   6   1 -12   93.39    9.00
  -6  -1 -12  101.19   10.10
   6  -1 -12   87.39    8.80
  -6   1 -12   82.89    7.30
   6   1  12   93.49   10.50
  -6  -1  12   91.29    9.50
  -6   1 -12   79.19    8.30
   6  -2  12   97.79    9.90
   6   2 -12   94.19    9.30
  -6   2  12   94.59   10.90
  -6  -2 -12   88.49    7.80
  -6   2 -12   97.39    7.90
  -6   2 -12  108.69   10.20
  -6  -2  12   93.59    7.80
   6   2  12   74.29    9.30
  -6  -2  12  100.39    9.80
   6  -2 -12   96.89    8.80
   6  -3  12   45.10    7.30
  -6  -3 -12   39.80    5.90
  -6   3  12   39.70    8.40
   6   3 -12   27.10    6.30
   6  -3 -12   30.70    5.80
  -6  -3  12   46.30    7.20
  -6   3 -12   36.10    7.10
  -6  -3  12   35.60    5.80
   6   3  12   42.90    7.90
   6   4 -12   52.69    8.50
  -6   4  12   50.59    9.20
  -6  -4 -12   51.69    6.80
   6  -4  12   48.70    7.90
   6  -4 -12   60.59    7.50
  -6  -4  12   64.29    7.80
  -6  -4  12   54.49    7.40
   6   4  12   62.79    9.10
  -6   4 -12   48.20    8.60
   6   0 -13  111.09    9.90
  -6   0  13  118.09   11.40
   6   0  13  116.39   11.30
  -6   0 -13  123.49    8.80
  -6  -1 -13   25.00    4.60
   6   1 -13   23.50    5.50
  -6   1  13   25.20    6.70
   6  -1  13   18.10    6.10
  -6   1 -13   24.10    5.70
   6  -1 -13   14.20    5.00
  -6  -1  13   16.70    5.80
   6   1  13   12.20    5.20
  -6   1 -13   25.20    4.80
  -6   2  13  305.67   19.40
  -6  -2 -13  280.77   14.80
   6   2 -13  315.37   17.70
   6  -2  13  292.77   17.90
  -6  -2  13  297.17   17.50
  -6   2 -13  307.07   17.50
   6  -2 -13  275.17   16.00
   6   2  13  304.57   18.60
  -6  -3 -13   10.20    4.50
   6   3 -13   11.10    5.00
  -6   3  13   17.90    6.30
   6  -3  13   12.80    5.10
  -6  -3  13   12.70    5.10
  -6   3 -13   12.30    5.50
   6  -3 -13    6.20    4.70
   6   3  13    6.40    5.80
   7   0   0    0.60    1.40
  -7   0   0   -0.40    0.90
   7   0   0    0.10    0.80
   7   0   0    1.80    1.50
  -7   0   0    0.30    0.90
   7   0   0   -0.30    0.90
  -7   1   0 2112.19   70.79
   7   1   0 2057.39   71.29
   7  -1   0 2062.39   71.79
   7   1   0 2108.09   70.59
  -7   1   0 2053.29   69.99
  -7  -1   0 2078.69   70.49
   7  -1   0 2130.49   70.09
  -7  -1   0 2079.89   71.19
   7  -1   0 2066.29   70.39
   7   1   0 2136.99   70.49
   7  -2   0 1668.93   56.89
   7  -2   0 1733.23   57.49
   7  -2   0 1712.43   56.59
  -7  -2   0 1654.83   57.49
   7   2   0 1687.53   56.19
  -7   2   0 1616.74   57.89
  -7  -2   0 1683.83   56.29
   7   2   0 1649.04   58.39
  -7   2   0 1680.73   58.79
  -7  -3   0 2207.88   76.59
  -7   3   0 2186.58   77.79
   7   3   0 2222.18   77.79
   7  -3   0 2201.88   75.59
  -7   3   0 2250.07   77.29
   7  -3   0 2323.37   76.39
  -7  -4   0   -2.50    2.00
   7   4   0   -0.50    2.30
  -7   4   0    0.10    2.50
  -7   5   0  187.88   11.30
  -7  -5   0  195.78   10.70
  -7  -5   0  225.28    8.00
   7  -5   0  201.58   11.90
   7   5   0  195.68   11.90
   7  -6   0   30.10    5.60
  -7  -6   0   38.10    2.80
  -7   6   0   39.00    4.70
   7   6   0   35.30    6.10
  -7  -6   0   27.90    5.00
  -7   6   0   29.20    5.60
   7  -7   0    2.10    4.00
   7   7   0   16.60    5.40
  -7  -7   0   11.00    4.60
   7   8   0   14.40    5.60
   7  -8   0    6.50    4.60
   7  -8   0    7.00    4.30
  -7  -8   0   18.80    4.90
   7   0  -1  721.83   24.90
   7   0   1  721.03   25.80
  -7   0  -1  726.53   25.10
   7   0  -1  714.63   25.70
  -7   0  -1  734.43   26.00
  -7   0  -1  725.03   24.90
  -7   0   1  731.33   25.90
  -7   0   1  747.13   25.30
   7   0  -1  700.83   25.30
   7   0   1  709.33   25.00
  -7   0   1  701.53   24.80
  -7  -1  -1  785.32   26.20
   7   1  -1  768.02   26.30
   7  -1   1  801.42   26.10
  -7   1   1  713.23   25.70
   7   1  -1  774.02   26.80
  -7   1   1  827.92   26.00
  -7  -1  -1  744.23   25.80
  -7   1   1  795.72   27.40
   7  -1   1  778.52   27.30
   7  -1   1  759.02   25.10
   7   1  -1  790.12   25.90
  -7  -1  -1  782.42   26.60
  -7  -1   1  699.73   25.90
   7  -1  -1  691.53   27.00
  -7  -1   1  705.93   26.50
   7  -1  -1  719.93   25.70
  -7   1  -1  716.73   26.30
   7   1   1  668.83   26.40
  -7  -1   1  711.13   25.80
   7   1   1  700.33   25.90
  -7   1  -1  693.43   24.90
   7  -1  -1  720.53   25.50
  -7   2   1  186.78    9.70
   7  -2   1  212.18    8.00
   7  -2   1  216.48    9.90
   7   2  -1  203.28    9.70
   7  -2   1  205.58    7.60
  -7   2   1  210.28    8.90
  -7   2   1  217.58    8.40
  -7  -2  -1  219.18    8.10
  -7  -2  -1  202.08    8.60
  -7  -2   1  196.18    8.80
  -7   2  -1  190.98    9.20
   7  -2  -1  200.48    8.10
   7   2   1  204.88    8.00
   7   2   1  203.48    9.60
   7  -2  -1  206.38    8.30
   7  -3   1  421.66   17.70
  -7  -3  -1  419.66   16.30
   7  -3   1  429.56   15.90
  -7   3   1  403.16   17.60
   7   3  -1  442.66   17.80
  -7   3   1  439.26   16.90
  -7  -3  -1  434.66   15.00
   7   3   1  415.56   15.10
   7   3   1  397.86   17.50
  -7  -3   1  397.86   16.60
   7  -3  -1  415.86   15.70
  -7   3  -1  414.96   17.50
  -7  -4  -1 1087.29   39.50
  -7  -4  -1 1093.69   37.60
  -7   4   1 1105.49   40.30
  -7   4   1 1080.19   41.10
   7   4  -1 1123.99   41.30
   7  -4   1 1096.79   41.00
  -7  -4   1 1107.09   40.10
  -7   4  -1 1080.99   41.00
   7  -4  -1 1114.99   39.00
   7   4   1 1076.59   40.90
   7   4   1 1111.49   37.90
  -7   4  -1 1092.49   38.80
  -7  -5  -1  411.76   15.40
  -7   5   1  421.36   19.10
   7  -5   1  415.86   18.90
   7   5  -1  413.86   19.30
  -7  -5  -1  419.36   17.70
  -7   5   1  418.36   18.50
   7  -5  -1  411.86   17.10
   7   5   1  414.56   15.70
   7   5   1  412.26   19.20
  -7  -5   1  429.46   18.30
  -7   5  -1  415.06   17.10
  -7   5  -1  425.96   19.30
  -7  -6  -1   53.99    6.00
   7  -6   1   57.89    7.10
   7   6  -1   68.09    7.90
  -7   6   1   69.29    7.60
  -7   6  -1   65.69    6.00
   7   6   1   71.09    8.00
  -7   6  -1   85.99    9.00
   7  -6  -1   63.49    6.10
  -7  -6   1   75.59    7.20
  -7  -7  -1  212.08   12.40
   7  -7   1  180.38   13.00
   7   7  -1  229.18   14.60
   7  -7  -1  200.98   12.30
   7  -7  -1  219.38   14.00
  -7   7  -1  220.08   12.00
  -7  -7   1  225.78   13.40
   7   7   1  234.88   14.70
  -7   7  -1  225.08   14.40
   7  -7  -1  224.68   12.20
   7   8  -1   16.20    5.90
  -7  -8  -1   16.00    5.20
   7  -8   1   29.90    6.30
   7  -8   1   15.90    5.30
   7  -8  -1   37.80    7.30
   7   8   1   31.00    7.10
  -7   8  -1   26.70    5.20
  -7  -8   1   18.40    5.50
   7  -8  -1   20.70    5.30
   7  -8  -1   23.20    5.00
  -7   0  -2  359.66   13.50
   7   0  -2  371.06   13.90
   7   0   2  353.96   13.10
  -7   0   2  398.16   13.80
  -7   0   2  373.96   14.30
   7   0  -2  376.76   14.20
   7   0  -2  370.66   13.20
  -7   0   2  370.96   13.00
   7   0   2  365.56   14.30
   7   0   2  338.47   13.30
  -7   0  -2  361.36   13.20
  -7   0  -2  343.47   14.20
  -7  -1  -2  162.48    7.00
  -7  -1  -2  150.88    6.30
  -7   1   2  156.08    7.80
   7   1  -2  161.88    6.90
   7   1  -2  145.49    7.20
  -7  -1  -2  154.58    7.10
   7   1  -2  161.38    6.50
  -7   1   2  146.29    6.40
  -7   1   2  167.38    6.20
   7   1   2  141.49    6.70
   7  -1  -2  150.38    6.60
  -7   1  -2  148.29    7.00
  -7  -1   2  146.59    6.60
   7  -1  -2  147.99    5.80
   7   1   2  152.18    6.40
  -7  -1   2  143.89    6.50
   7   1   2  145.19    6.90
  -7  -2  -2 2023.90   68.59
   7   2  -2 1956.80   69.89
  -7   2   2 1966.90   70.29
   7  -2   2 1980.60   67.39
  -7   2   2 1970.50   68.89
   7  -2   2 1869.01   69.89
  -7  -2  -2 1974.20   68.49
  -7   2   2 2019.00   68.69
   7  -2   2 1975.80   67.59
   7   2  -2 2026.70   67.59
   7  -2  -2 2072.09   68.59
   7   2   2 2072.39   68.69
   7  -2  -2 2136.29   68.09
  -7  -2   2 2074.09   67.69
  -7   2  -2 2076.79   70.09
  -7  -2   2 2063.59   69.29
   7   2   2 2053.29   69.79
  -7  -3  -2    0.70    1.20
   7   3  -2    0.90    2.30
   7  -3   2    3.60    1.30
  -7   3   2    0.30    1.80
   7  -3   2    0.70    2.50
  -7  -3  -2    1.80    1.60
  -7   3   2    0.60    2.30
   7  -3  -2    0.80    1.50
  -7   3  -2   -0.40    2.10
  -7  -3   2    5.50    2.30
   7   3   2    2.60    1.40
   7  -3  -2    0.40    1.30
  -7   3  -2    2.20    1.30
   7   3   2    0.60    2.20
   7  -4   2  336.27   13.60
  -7   4   2  330.57   14.30
   7   4  -2  324.97   15.60
  -7  -4  -2  323.67   12.80
  -7  -4  -2  315.77   13.70
   7  -4   2  340.77   15.40
  -7   4   2  314.27   15.40
  -7   4  -2  319.47   13.20
  -7   4  -2  325.37   15.70
   7  -4  -2  329.97   13.60
   7   4   2  345.07   15.60
   7   4   2  340.47   13.10
  -7  -4   2  333.67   14.80
   7  -5   2  111.29    8.50
  -7   5   2  132.19    9.40
  -7   5   2  127.69    8.30
   7   5  -2  120.59    9.10
  -7  -5  -2  123.29    6.20
  -7  -5  -2  121.59    7.60
  -7   5  -2  118.49    9.30
   7  -5  -2  129.59    7.70
   7   5   2  129.79    6.70
  -7   5  -2  125.29    7.20
  -7  -5   2  133.39    8.70
   7   5   2  119.69    9.10
  -7  -6  -2  529.75   21.80
   7   6  -2  559.44   24.30
  -7   6   2  519.05   23.80
   7  -6   2  567.94   23.70
  -7   6  -2  518.55   21.30
   7  -6  -2  496.35   21.40
   7   6   2  504.05   20.10
  -7   6  -2  531.05   24.50
  -7  -6   2  494.25   22.70
   7   6   2  508.55   23.70
   7  -7   2  244.18   14.40
  -7  -7  -2  249.18   13.70
   7   7  -2  249.58   15.50
  -7   7   2  257.97   15.40
   7   7   2  263.37   16.00
   7  -7  -2  248.08   13.50
  -7   7  -2  253.47   13.30
  -7   7  -2  262.17   16.30
   7  -7  -2  254.37   13.40
  -7  -7   2  277.07   15.10
   7  -8   2   28.40    6.60
   7  -8   2   18.00    5.30
  -7  -8  -2   19.30    5.20
   7   8  -2   12.60    5.60
   7  -8  -2   27.60    5.20
   7  -8  -2   21.70    6.40
  -7   8  -2   20.30    4.80
   7   8   2   25.80    6.40
   7  -8  -2   20.30    4.80
  -7  -8   2   25.30    5.90
  -7   0  -3 1485.25   50.09
   7   0  -3 1494.95   50.09
   7   0  -3 1514.65   50.99
  -7   0  -3 1437.76   50.39
   7   0   3 1448.96   51.19
   7   0   3 1474.25   50.59
  -7   0  -3 1491.95   52.49
  -7   0   3 1466.65   49.70
   7   0   3 1476.55   49.80
  -7   0   3 1433.26   51.19
   7   0  -3 1472.35   51.09
  -7   1   3  221.98    8.20
   7   1  -3  224.78    9.40
   7  -1   3  222.18   10.20
   7   1  -3  221.68    9.10
   7   1  -3  207.68    9.80
  -7   1   3  200.58   10.00
  -7  -1  -3  220.38    9.70
  -7  -1  -3  207.68    8.70
  -7  -1  -3  212.88    9.50
  -7  -1   3  238.48    9.40
   7  -1  -3  227.78    9.30
   7   1   3  226.08    9.60
   7   1   3  230.38    9.40
  -7  -1   3  236.38    9.20
   7   1   3  220.38    9.40
  -7   1  -3  227.28    9.70
   7  -1  -3  238.68    8.20
   7  -2   3 5234.78  178.18
   7   2  -3 5196.48  177.98
   7   2  -3 5276.97  175.98
  -7  -2  -3 5379.76  177.08
  -7   2   3 5207.18  178.48
  -7   2   3 5279.67  176.18
  -7  -2  -3 5258.77  176.28
   7   2   3 5224.08  177.08
   7   2   3 5272.07  177.68
   7  -2  -3 5327.97  176.68
  -7  -2   3 5222.68  177.28
  -7   2  -3 5343.77  178.28
   7  -2  -3 5407.46  175.58
  -7  -2   3 5206.18  176.08
  -7   3   3  633.34   25.40
  -7   3   3  611.94   23.10
   7   3  -3  593.44   24.80
   7  -3   3  633.14   22.40
  -7  -3  -3  599.64   23.20
   7  -3   3  653.93   25.10
  -7  -3  -3  608.74   22.90
   7   3  -3  643.54   21.90
  -7   3  -3  653.93   25.50
   7   3   3  627.24   24.70
  -7   3  -3  646.74   22.40
  -7  -3   3  639.04   21.90
   7   3   3  628.24   23.40
  -7  -3   3  624.74   24.30
   7  -3  -3  653.23   23.40
   7  -3  -3  662.93   22.60
  -7  -4  -3  414.16   16.40
  -7   4   3  403.96   18.70
   7  -4   3  422.76   16.00
  -7   4   3  428.26   16.80
   7  -4   3  425.66   18.20
   7   4  -3  405.36   18.40
   7   4   3  397.06   16.30
  -7   4  -3  421.66   16.00
  -7   4  -3  399.86   18.70
   7   4   3  421.46   18.30
   7  -4  -3  410.66   16.60
  -7  -4   3  403.66   17.70
   7  -5   3   65.09    6.50
   7   5  -3   74.49    7.40
  -7   5   3   87.39    7.80
  -7  -5  -3   77.39    5.90
   7   5   3   71.59    7.60
  -7   5  -3   67.09    7.70
   7  -5  -3   69.99    5.90
  -7   5  -3   72.59    5.40
   7   5   3   61.29    5.10
  -7  -5   3   59.49    6.30
   7   6  -3  125.89   10.40
  -7   6   3  120.99   10.10
  -7  -6  -3  121.89    7.90
   7  -6   3  113.19    8.80
   7   6   3  114.99    7.30
  -7  -6   3  111.89    9.10
   7  -6  -3   99.49    7.40
  -7   6  -3  100.09    9.90
   7  -6  -3   96.59    7.80
  -7   6  -3  112.59    7.50
   7   6   3  101.79    9.50
  -7   7   3   30.60    6.40
   7  -7   3   32.70    5.80
  -7  -7  -3   20.90    4.60
   7   7  -3   29.00    6.60
   7  -7  -3   33.80    5.40
   7  -7  -3   28.70    4.70
  -7   7  -3   29.90    5.00
  -7  -7   3   25.00    5.80
  -7   7  -3   21.20    6.20
   7   7   3   36.30    6.80
  -7  -8  -3    8.20    4.00
   7   8  -3    7.10    4.80
  -7   8   3   12.40    5.30
   7  -8   3    5.60    4.20
   7  -8  -3    8.00    3.80
   7  -8  -3    2.60    3.90
  -7  -8   3   10.30    5.20
   7   8   3    6.80    5.00
  -7   8  -3    8.80    4.20
  -7   0  -4   50.69    2.90
   7   0  -4   53.19    3.30
  -7   0  -4   51.59    3.60
  -7   0   4   52.59    2.90
   7   0   4   44.50    4.20
   7   0  -4   59.09    4.20
  -7   0   4   47.60    4.20
  -7   0  -4   49.30    3.20
  -7   1   4 1359.16   43.40
  -7  -1  -4 1305.57   45.20
   7   1  -4 1328.77   44.90
   7   1  -4 1322.17   45.00
   7   1  -4 1320.77   45.80
   7  -1   4 1262.07   45.80
  -7  -1  -4 1270.67   44.20
  -7   1   4 1272.47   46.10
  -7  -1   4 1255.17   45.00
  -7   1  -4 1255.37   45.40
  -7   1  -4 1280.37   43.50
   7   1   4 1298.27   45.50
   7  -1  -4 1297.27   43.50
  -7  -1   4 1249.77   44.50
   7  -1  -4 1264.07   44.90
   7   1   4 1240.18   44.60
  -7   1  -4 1304.97   43.40
   7  -2   4  190.48    6.80
  -7   2   4  182.98    9.90
  -7   2   4  183.68    7.30
  -7  -2  -4  188.58    7.80
   7   2  -4  189.58    8.10
   7   2  -4  184.18    9.50
   7  -2   4  177.68    9.50
   7  -2  -4  192.08    6.80
   7   2   4  197.68    9.20
   7  -2  -4  199.98    8.70
  -7   2  -4  180.58    9.80
  -7  -2   4  197.88    9.20
  -7   2  -4  188.38    7.20
   7   2   4  189.68    9.30
  -7  -2   4  189.18    8.20
   7  -3   4  537.15   21.90
  -7   3   4  540.95   22.50
  -7  -3  -4  538.55   19.70
   7   3  -4  576.04   19.40
   7  -3   4  542.05   19.00
  -7   3   4  535.35   19.50
   7   3  -4  542.05   21.90
  -7  -3   4  522.25   19.30
  -7   3  -4  523.25   19.30
   7   3   4  513.95   21.40
   7   3   4  524.55   20.70
   7  -3  -4  547.25   18.80
  -7   3  -4  516.55   22.20
  -7  -3   4  532.85   21.30
   7  -3  -4  515.75   20.20
   7   4  -4  130.09    8.80
   7   4  -4  125.19    5.70
  -7   4   4  137.09    9.30
   7  -4   4  128.99    8.40
   7  -4   4  138.69    6.50
  -7  -4  -4  123.59    6.60
  -7   4  -4  123.69    9.10
   7  -4  -4  116.39    6.00
   7  -4  -4  114.19    7.20
  -7  -4   4  120.19    5.50
   7   4   4  111.99    8.20
  -7   4  -4  130.39    6.60
  -7  -4   4  128.99    8.40
   7   4   4  120.69    7.40
   7  -5   4   83.29    7.10
  -7  -5  -4   79.59    5.80
   7   5  -4   76.69    7.60
  -7   5   4   70.39    7.40
  -7  -5   4   56.59    6.80
   7   5   4   83.89    7.50
   7  -5  -4   75.09    6.20
   7  -5  -4   66.19    5.30
  -7  -5   4   68.09    3.70
  -7   5  -4   83.89    5.70
  -7  -5   4   76.59    3.60
  -7   5  -4   68.89    8.40
   7   5   4   74.99    6.00
   7   6  -4   87.09    9.60
  -7   6   4  108.79    9.70
  -7  -6  -4   95.09    6.90
   7  -6   4   95.99    8.30
   7  -6  -4  108.59    7.10
   7   6   4   94.29    9.20
  -7   6  -4   83.39    9.70
   7  -6  -4   98.89    7.70
  -7   6  -4  102.69    7.20
  -7  -6   4   89.29    9.00
   7   6   4  100.29    7.50
   7   7  -4   56.99    8.30
   7  -7   4   53.29    7.20
  -7   7   4   69.79    9.10
  -7  -7  -4   60.09    6.20
   7  -7  -4   50.49    6.40
  -7   7  -4   58.89    9.30
   7  -7  -4   60.59    6.20
   7   7   4   58.19    8.00
  -7  -7   4   62.29    8.10
  -7   7  -4   56.69    6.20
  -7  -8  -4    0.00    3.10
   7   8  -4   -0.10    4.20
   7  -8   4    2.20    4.20
  -7   8   4    1.30    4.40
  -7  -8   4   -2.20    4.00
   7   8   4    7.70    4.80
   7  -8  -4   -2.50    3.60
  -7   0   5   44.80    2.90
   7   0   5   40.50    4.10
  -7   0   5   44.20    4.50
   7   0  -5   46.00    4.20
  -7   0  -5   48.10    3.00
  -7   0  -5   47.90    3.80
  -7   0  -5   50.79    3.50
  -7   1   5  218.48   11.50
   7  -1   5  216.38   11.20
   7   1  -5  238.98   11.20
  -7   1   5  230.58    8.60
  -7  -1  -5  222.08    9.80
  -7  -1  -5  235.28   10.10
  -7  -1   5  264.77   11.10
  -7   1  -5  220.18    9.20
  -7  -1   5  267.17   12.30
  -7   1  -5  270.67   11.40
   7   1   5  279.67   11.60
  -7  -1   5  272.67   10.40
   7  -1  -5  265.47   10.90
   7   2  -5  411.26   16.80
  -7  -2  -5  414.36   16.10
   7   2  -5  418.56   18.20
   7  -2   5  408.06   18.20
   7  -2   5  425.06   15.40
  -7   2   5  412.56   18.70
   7  -2  -5  449.26   17.30
  -7   2  -5  463.25   18.80
  -7   2  -5  469.45   15.90
  -7  -2   5  458.85   17.70
  -7  -2   5  458.15   17.20
   7   2   5  455.45   17.60
   7   2   5  469.05   18.20
  -7   3   5  629.94   25.40
   7  -3   5  623.64   24.60
   7   3  -5  621.04   24.70
   7  -3   5  625.74   21.40
  -7  -3  -5  631.64   22.10
   7   3  -5  634.04   22.50
   7   3   5  570.94   23.70
   7   3   5  586.54   23.90
  -7  -3   5  597.74   22.40
   7  -3  -5  606.14   21.10
   7  -3  -5  615.34   20.70
  -7  -3   5  589.94   23.90
   7  -3  -5  600.04   23.10
  -7   3  -5  588.04   21.90
  -7   3  -5  603.64   25.20
   7  -4   5  285.77   14.30
  -7  -4  -5  297.77   12.10
   7   4  -5  284.87   11.90
   7   4  -5  307.97   15.10
   7  -4   5  282.57   11.70
  -7   4   5  285.57   15.00
  -7  -4   5  293.07   14.40
   7   4   5  303.47   14.40
   7  -4  -5  293.57   11.40
  -7  -4   5  294.17   11.70
  -7   4  -5  282.47   15.30
   7  -4  -5  310.57   11.20
  -7   4  -5  285.77   12.20
   7   4   5  292.77   13.70
   7  -4  -5  290.07   13.10
   7   5  -5   54.19    7.00
  -7   5   5   63.39    7.60
  -7  -5  -5   64.79    5.10
   7  -5   5   67.99    7.00
   7  -5  -5   63.79    6.10
  -7   5  -5   61.89    8.10
  -7   5  -5   59.79    5.30
   7  -5  -5   71.39    4.80
   7   5   5   59.79    5.90
   7   5   5   69.69    7.10
  -7  -5   5   70.39    7.60
  -7  -5   5   61.09    3.90
   7   6  -5  230.88   14.60
  -7  -6  -5  271.77   12.00
   7  -6   5  224.38   13.50
  -7   6   5  256.17   15.40
  -7   6  -5  242.78   12.20
   7   6   5  234.68   12.90
   7  -6  -5  244.48   13.10
  -7  -6   5  228.18   14.20
  -7   6  -5  246.58   16.00
   7  -6  -5  257.87   11.60
   7   6   5  254.77   14.60
   7   7  -5    9.60    5.10
  -7  -7  -5    6.00    3.40
  -7   7   5    3.40    4.60
   7  -7   5    4.40    3.80
  -7  -7   5    5.80    4.60
   7   7   5    3.80    4.40
   7  -7  -5    7.20    4.10
  -7   7  -5    2.20    4.60
  -7   0   6 1131.09   38.50
   7   0  -6 1008.10   40.30
  -7   0  -6 1126.29   39.90
   7   0   6 1148.79   41.10
  -7   0  -6 1127.39   39.60
  -7   0   6 1113.69   41.00
  -7   0  -6 1159.68   38.70
  -7   0   6 1143.19   39.20
   7  -1   6  680.73   26.70
  -7  -1  -6  670.73   24.90
  -7   1   6  693.13   27.30
  -7  -1  -6  684.23   25.00
   7   1  -6  696.33   26.70
   7  -1   6  700.13   24.40
  -7  -1   6  710.63   26.40
  -7  -1   6  704.63   25.20
   7   1   6  705.13   26.90
  -7   1  -6  607.04   24.30
   7  -1  -6  711.83   26.00
  -7   1  -6  717.63   26.50
  -7  -2  -6 1670.53   58.69
   7   2  -6 1693.53   60.19
   7  -2   6 1583.24   59.89
  -7  -2  -6 1587.84   57.59
   7  -2   6 1660.53   56.89
  -7   2   6 1650.83   60.79
   7  -2  -6 1725.53   58.89
  -7   2  -6 1765.02   57.59
  -7  -2   6 1705.53   59.09
   7   2   6 1740.13   60.19
  -7  -2   6 1722.83   59.09
  -7   2  -6 1702.13   60.49
  -7   3   6  194.88   11.50
   7   3  -6  175.78   10.40
   7  -3   6  172.98    7.30
  -7  -3  -6  162.18    7.80
   7  -3   6  165.78    9.90
  -7  -3  -6  167.58    9.70
  -7   3  -6  192.38    8.20
  -7  -3   6  184.18    8.80
   7   3   6  188.08   10.10
  -7  -3   6  193.98   10.10
  -7   3  -6  178.58   10.80
   7   4  -6  407.36   19.00
   7  -4   6  396.46   16.40
  -7   4   6  402.26   19.60
   7  -4   6  396.16   18.20
  -7  -4  -6  383.76   15.50
   7  -4  -6  414.26   14.20
   7   4   6  394.26   17.90
  -7   4  -6  412.26   16.20
  -7  -4   6  395.26   18.20
   7   4   6  393.66   17.90
   7  -4  -6  416.76   17.20
  -7   4  -6  432.66   20.20
   7  -4  -6  410.86   14.00
  -7  -4   6  381.56   15.90
   7  -5   6   19.50    4.40
  -7   5   6   18.40    5.30
   7   5  -6   19.90    4.80
  -7  -5  -6   21.20    3.20
   7   5   6    9.00    3.70
   7  -5  -6   13.70    2.20
   7  -5  -6   11.00    3.70
  -7   5  -6   16.60    5.20
  -7  -5   6   15.30    2.60
   7   5   6   20.30    4.60
  -7   5  -6   16.30    3.40
  -7  -5   6   17.50    4.70
  -7  -6  -6  149.88    8.40
  -7   6   6  145.99   12.00
   7  -6   6  141.79   10.70
   7   6  -6  135.59   11.40
  -7   6  -6  166.08    9.60
   7   6   6  163.08   10.70
   7   6   6  165.98   11.40
   7  -6  -6  169.08   10.40
  -7  -6   6  163.08   11.80
  -7   6  -6  145.99   12.30
  -7   7   6  112.79   11.30
   7   7  -6  112.19   11.20
  -7  -7  -6  110.69    7.80
   7  -7   6   96.49    9.00
   7   7   6  110.09   10.30
  -7   7  -6  105.19   12.80
   7  -7  -6  112.69    9.30
  -7  -7   6   83.49    9.80
   7   0  -7  128.89    8.00
   7   0   7  132.79    8.50
  -7   0  -7  147.29    6.50
  -7   0   7  140.09    6.60
  -7   0  -7  137.19    7.60
  -7   0   7  135.19    6.10
  -7   0   7  146.39    8.80
   7   1  -7  120.09    7.90
  -7  -1  -7  129.79    6.70
   7  -1   7  125.59    6.20
  -7  -1  -7  129.29    6.50
  -7   1   7  123.79    8.60
   7  -1   7  131.29    8.20
  -7   1  -7  115.69    7.80
   7   1   7  111.79    8.00
   7  -1  -7  120.29    7.40
  -7  -1   7  116.09    6.50
  -7   1  -7  124.39    6.10
  -7  -1   7  119.29    7.70
   7   2  -7  775.52   29.50
  -7  -2  -7  724.33   26.60
   7  -2   7  744.33   26.00
  -7  -2  -7  748.03   27.60
  -7   2   7  774.12   30.30
   7  -2   7  746.93   29.20
   7   2   7  732.83   29.20
  -7   2  -7  750.82   26.70
  -7  -2   7  719.53   27.90
  -7  -2   7  702.23   28.20
   7  -2  -7  729.93   27.90
  -7   2  -7  721.43   29.30
   7   3  -7  336.77   15.80
   7  -3   7  314.27   15.10
  -7  -3  -7  306.77   14.20
  -7   3   7  320.17   16.40
   7  -3   7  314.67   11.80
  -7  -3  -7  323.97   12.50
  -7   3  -7  303.87   15.90
  -7   3  -7  307.97   12.70
  -7  -3   7  280.17   14.20
  -7  -3   7  306.77   13.70
   7  -3  -7  303.67   13.90
   7   3   7  289.37   14.80
   7   4  -7   95.39    8.40
   7  -4   7   97.49    8.00
  -7   4   7  100.69    9.40
  -7  -4  -7  112.09    8.60
  -7  -4  -7  110.59    5.80
  -7  -4   7   93.49    8.00
   7   4   7   89.59    8.00
  -7   4  -7  106.49    6.40
  -7   4  -7   96.19    9.50
  -7  -4   7  106.09    6.60
   7  -4  -7   88.29    7.10
  -7  -5  -7   86.49    5.70
  -7  -5  -7   88.29    8.60
   7  -5   7   87.09    8.40
   7   5  -7   82.59    8.70
  -7   5   7   79.09    9.30
  -7   5  -7   87.09    6.60
  -7  -5   7   84.99    8.50
   7  -5  -7   90.49    7.70
  -7   5  -7   88.69   10.30
  -7  -5   7   94.69    6.00
   7   5   7   93.59    8.30
   7   6  -7   95.09   10.10
  -7  -6  -7  104.49    6.60
  -7   6   7  106.79   10.80
  -7  -6  -7   94.99    9.70
   7  -6   7   97.09    9.10
  -7   6  -7  114.49   11.50
   7  -6  -7  107.69    9.00
   7   6   7  116.79    9.60
  -7  -6   7  105.99   10.10
   7  -7   7   53.09    7.50
  -7  -7  -7   58.89    5.80
  -7   7   7   43.70    8.70
   7   7  -7   39.00    7.60
  -7  -7  -7   40.20    7.20
  -7   7  -7   45.50    8.60
   7  -7  -7   51.29    6.80
  -7  -7   7   48.90    7.80
   7   7   7   40.70   10.10
   7   0  -8  154.18    9.20
   7   0   8  147.79    9.50
  -7   0  -8  169.08    8.90
  -7   0   8  164.28    7.30
  -7   0  -8  158.48    7.50
  -7   0   8  158.48    9.70
  -7   0   8  154.68    6.90
  -7   1   8  286.57   14.30
   7   1  -8  237.98   12.90
  -7  -1  -8  274.77   11.70
  -7  -1  -8  271.47   11.30
   7  -1   8  297.67   13.80
   7  -1  -8  255.57   12.50
  -7   1  -8  248.48   11.00
   7   1   8  238.38   13.20
  -7  -1   8  244.98   13.00
  -7   1  -8  250.57   12.80
  -7  -1   8  247.48   11.20
   7   2  -8  248.28   13.40
  -7  -2  -8  231.18   11.60
  -7   2   8  238.88   13.90
   7  -2   8  246.18   13.30
  -7  -2  -8  246.88   10.90
  -7   2  -8  263.27   13.80
  -7   2  -8  280.27   11.30
   7   2   8  255.97   13.30
  -7  -2   8  263.27   12.80
  -7  -2   8  253.67   12.10
   7  -2  -8  263.27   12.40
   7   3  -8   63.49    7.00
   7  -3   8   61.39    6.50
  -7  -3  -8   71.59    6.40
  -7   3   8   61.19    7.90
  -7  -3   8   40.60    5.40
  -7  -3   8   47.80    5.40
  -7   3  -8   35.90    6.00
   7  -3  -8   33.70    4.50
   7   3   8   36.90    5.60
  -7   3  -8   47.40    4.30
   7  -4   8   82.79    7.80
  -7   4   8   82.09    9.40
  -7  -4  -8   86.69    5.40
   7   4  -8   92.69    8.60
  -7  -4  -8   80.79    7.70
  -7  -4   8   72.69    6.20
  -7   4  -8   78.79    9.30
  -7   4  -8   79.49    6.00
  -7  -4   8   79.79    7.70
   7  -4  -8   77.49    7.20
   7   4   8   68.99    7.70
  -7   5   8  179.28   13.70
  -7  -5  -8  178.08   11.80
  -7  -5  -8  179.38    8.80
   7  -5   8  180.88   12.00
   7   5  -8  202.38   13.40
  -7   5  -8  198.48   14.20
  -7  -5   8  200.38   10.10
   7  -5  -8  190.98   11.40
  -7  -5   8  192.88   12.60
   7   5   8  184.38   12.20
  -7  -6  -8   22.80    5.80
  -7   6   8   23.80    6.60
   7  -6   8   24.70    5.40
   7   6  -8   30.00    6.70
  -7  -6  -8   20.30    3.70
  -7   6  -8   17.30    6.00
   7  -6  -8   13.50    4.90
   7   6   8   12.80    5.00
  -7  -6   8   26.20    6.00
   7   0   9    8.80    3.30
  -7   0   9    9.60    1.80
  -7   0   9    7.70    3.40
  -7   0  -9   10.90    3.20
  -7   0  -9   10.70    2.60
   7   0  -9   11.50    3.40
  -7  -1  -9  461.35   17.80
  -7   1   9  431.26   20.60
   7  -1   9  450.15   20.20
   7   1  -9  395.26   19.50
  -7  -1  -9  461.85   18.30
  -7   1  -9  423.46   19.30
  -7  -1   9  432.16   17.50
  -7  -1   9  415.36   19.80
   7   1   9  446.46   20.50
   7  -1  -9  449.56   19.20
  -7   1  -9  483.25   17.90
  -7   2   9   46.10    7.10
  -7  -2  -9   40.30    4.50
   7   2  -9   44.30    6.20
  -7  -2  -9   39.20    4.10
   7  -2   9   36.10    5.70
  -7  -2   9   44.10    5.60
   7   2   9   43.40    6.20
   7  -2  -9   40.90    5.10
  -7   2  -9   35.30    5.80
  -7   2  -9   43.60    4.40
  -7  -2   9   45.80    5.00
  -7   3   9  359.66   19.00
   7   3  -9  360.96   17.90
  -7  -3  -9  343.17   14.20
  -7  -3  -9  339.87   15.60
   7  -3   9  332.17   17.10
  -7   3  -9  350.06   14.90
  -7   3  -9  331.07   17.90
  -7  -3   9  342.77   16.20
   7   3   9  325.27   17.30
   7  -3  -9  358.16   16.00
  -7  -3   9  354.16   16.40
  -7  -4  -9   36.20    5.40
  -7  -4  -9   30.80    3.60
  -7   4   9   40.00    7.00
   7   4  -9   38.80    6.50
   7  -4   9   29.90    5.70
   7   4   9   26.00    5.60
  -7   4  -9   33.50    5.50
  -7  -4   9   38.00    6.00
  -7   4  -9   41.40    7.40
   7  -4  -9   30.50    5.00
  -7  -4   9   32.90    5.10
   7  -5   9   30.10    5.60
  -7  -5  -9   32.20    5.70
  -7   5   9   47.10    8.40
   7   5  -9   26.50    6.30
  -7  -5   9   39.00    6.80
  -7   5  -9   30.90    6.90
   7   5   9   36.30    6.70
   7  -5  -9   28.20    5.20
  -7  -6  -9    6.40    5.10
   7   6  -9    9.20    5.00
  -7   6   9    4.20    5.40
   7  -6   9    6.30    4.40
  -7  -6   9    3.80    4.40
  -7   6  -9    3.00    5.40
   7  -6  -9    7.40    4.50
   7   6   9    7.80    4.80
  -7   0  10  225.38   13.50
  -7   0  10  219.38    9.20
   7   0  10  230.98   13.50
   7   0 -10  236.28   12.70
  -7   0 -10  214.58   11.70
  -7   0 -10  213.48   10.50
  -7  -1 -10   28.90    4.20
  -7  -1 -10   33.80    4.20
  -7   1  10   37.70    6.50
   7   1 -10   42.20    6.10
   7  -1  10   40.40    6.30
   7   1  10   27.30    5.50
  -7  -1  10   27.10    5.40
  -7   1 -10   34.90    5.40
  -7  -1  10   30.90    3.90
  -7   1 -10   36.10    4.40
   7  -1 -10   23.50    4.60
  -7  -2 -10  321.07   13.60
   7  -2  10  295.57   15.60
   7   2 -10  249.78   15.20
  -7  -2 -10  315.47   13.30
  -7   2  10  324.87   17.30
   7   2  10  288.87   16.00
  -7  -2  10  279.87   13.60
   7  -2 -10  289.67   14.30
  -7   2 -10  236.58   12.70
  -7   2 -10  294.57   15.70
  -7  -2  10  270.87   14.90
  -7  -3 -10   15.40    3.10
  -7   3  10   28.60    6.80
  -7  -3 -10   19.90    4.30
   7   3 -10   23.00    5.60
   7  -3  10   18.40    5.10
  -7  -3  10   25.90    5.00
  -7  -3  10   29.70    5.20
   7  -3 -10   23.30    4.70
   7   3  10   22.10    5.60
  -7   3 -10   25.60    5.90
  -7   3 -10   24.80    3.90
  -7  -4 -10  143.09   10.10
  -7   4  10  136.39   12.40
   7  -4  10  136.79   10.70
   7   4 -10  141.39   11.60
   7  -4 -10  120.79    9.40
  -7   4 -10  137.29   12.30
  -7  -4  10  130.89    9.50
   7   4  10  131.19   11.10
  -7  -4  10  131.29   10.00
   7  -5  10   19.10    5.60
  -7   5  10   23.60    7.00
   7   5 -10   15.20    5.70
  -7  -5 -10   14.60    5.00
  -7  -5  10   25.50    5.90
   7  -5 -10   13.70    4.80
   7   5  10   15.10    5.70
  -7   5 -10   19.80    6.60
   7   0  11  151.28   11.50
   7   0 -11  161.38   10.80
  -7   0 -11  153.98   10.10
  -7   0  11  148.19   11.60
  -7   0 -11  153.78    8.80
  -7  -1 -11   10.60    3.20
   7  -1  11   12.10    4.60
  -7  -1 -11   14.00    3.80
  -7   1  11   12.60    5.20
   7   1 -11   13.80    4.50
  -7  -1  11   15.00    3.20
  -7  -1  11   12.00    4.70
   7  -1 -11   17.60    4.50
  -7   1 -11   11.60    4.30
   7   1  11   12.80    4.90
  -7   1 -11   12.50    3.50
  -7  -2 -11  307.07   14.00
   7   2 -11  278.47   16.40
  -7   2  11  299.37   17.90
   7  -2  11  317.37   17.30
  -7  -2 -11  323.87   14.50
  -7  -2  11  307.67   16.40
  -7   2 -11  323.17   17.00
   7   2  11  308.27   17.40
   7  -2 -11  272.27   15.10
  -7  -2  11  314.57   14.50
  -7   2 -11  274.87   13.90
  -7   3  11   26.40    7.00
   7  -3  11   21.10    5.70
  -7  -3 -11   21.00    4.60
   7   3 -11   27.30    5.90
   7  -3 -11   23.60    5.10
   7   3  11   25.00    5.90
  -7  -3  11   14.70    4.70
  -7   3 -11   23.20    6.10
  -7  -3  11   26.50    4.90
   7   4 -11   43.70    7.80
   7  -4  11   46.10    7.30
  -7  -4 -11   40.20    6.00
  -7   4  11   34.30    7.50
  -7  -4  11   57.79    7.10
  -7  -4  11   54.59    7.10
  -7   4 -11   63.09    9.10
   7   4  11   50.99    8.20
   7  -4 -11   48.30    6.40
   7   5 -11    4.90    4.80
  -7   5  11    8.40    6.00
   7  -5  11    4.80    4.50
  -7  -5 -11    7.00    4.50
   7  -5 -11    3.00    4.20
  -7  -5  11    0.00    4.30
   7   5  11    3.00    4.70
  -7   5 -11    5.70    5.60
  -7   0 -12   65.29    7.10
   7   0 -12   55.59    7.30
   7   0  12   53.29    7.70
  -7   0 -12   60.99    6.10
  -7   0  12   55.09    7.90
  -7  -1 -12   27.40    4.80
   7  -1  12   25.80    6.10
  -7  -1 -12   23.30    4.20
   7   1 -12   30.90    6.00
  -7   1  12   26.40    6.10
   7   1  12   16.20    5.60
  -7  -1  12   26.10    5.90
  -7   1 -12   22.90    5.50
   7  -1 -12   18.50    4.70
  -7   1 -12   24.20    4.40
  -7   2  12  186.38   14.70
   7  -2  12  202.08   14.10
  -7  -2 -12  220.18   11.50
   7   2 -12  188.48   13.30
   7  -2 -12  206.38   12.70
  -7   2 -12  202.18   13.60
  -7  -2  12  198.88   13.40
   7   2  12  177.08   13.70
   7  -3  12  163.88   12.80
  -7   3  12  168.38   14.30
   7   3 -12  131.09   11.90
  -7  -3 -12  161.18   10.50
   7  -3 -12  182.08   11.70
  -7   3 -12  165.98   13.10
  -7  -3  12  168.48   10.90
   7   3  12  169.78   13.20
  -7  -3  12  174.68   12.30
   7  -4  12    5.30    4.60
  -7   4  12    3.80    5.50
   7   4 -12    1.50    4.10
  -7  -4 -12    5.90    4.30
  -7  -4  12    1.70    4.10
   7  -4 -12    6.20    4.70
   7   4  12    6.80    5.00
  -7  -4  12   11.50    4.40
  -7   4 -12   -0.10    4.70
   7   0 -13    7.90    4.30
   7   0  13    7.90    5.20
  -7   0  13    4.60    4.70
  -7   0 -13    6.30    3.50
   7  -1  13  121.69   11.50
   7   1 -13  131.39   10.80
  -7  -1 -13  121.59    8.90
  -7   1  13  118.29   11.90
   7  -1 -13  118.39   10.50
   7   1  13  116.69   11.50
  -7   1 -13  116.09   10.30
  -7  -1  13  132.79   12.00
   7   2 -13   76.89    9.30
  -7  -2 -13   61.79    7.00
   7  -2  13   79.19   10.10
  -7   2  13   83.89   11.50
   7  -2 -13   89.59    9.00
  -7  -2  13   76.69    9.60
  -7   2 -13   92.09   10.20
   7   2  13   77.59    9.80
   8   0   0 6599.84  224.08
   8   0   0 6574.14  223.88
  -8   0   0 6672.33  225.28
   8   0   0 6778.62  224.88
  -8   0   0 6775.62  223.98
   8   0   0 6928.31  225.08
   8   1   0  392.66   15.10
   8  -1   0  369.66   15.60
  -8  -1   0  384.96   14.90
  -8  -1   0  372.56   14.20
  -8   1   0  366.16   13.80
   8  -1   0  406.06   13.90
   8  -1   0  403.16   14.20
  -8   1   0  402.56   14.60
   8   1   0  392.26   14.50
   8   1   0  398.76   14.40
  -8  -2   0  702.53   25.70
   8   2   0  713.73   24.50
   8  -2   0  774.52   26.50
  -8   2   0  693.43   26.10
   8  -2   0  703.03   25.00
   8  -2   0  699.03   24.70
   8   2   0  725.33   26.80
   8  -3   0    4.70    1.40
  -8  -3   0    1.90    1.70
  -8   3   0    5.50    2.50
   8   3   0    2.70    2.40
   8  -3   0    5.40    1.70
  -8   4   0 1198.78   44.10
   8  -4   0 1206.38   41.90
  -8  -4   0 1192.28   43.10
   8   4   0 1188.38   44.60
   8   5   0   79.59    7.60
   8  -5   0   68.99    7.30
  -8  -5   0   75.39    6.30
   8  -5   0   87.49    5.70
  -8   5   0   77.99    6.90
  -8  -6   0  285.97   14.70
  -8   6   0  315.97   16.30
   8   6   0  305.77   16.50
   8  -6   0  290.07   13.60
   8  -6   0  315.27   16.50
   8  -7   0  351.16   18.60
  -8  -7   0  355.36   17.40
  -8   7   0  325.67   18.40
   8  -7   0  338.07   16.00
   8   7   0  350.16   19.10
   8   8   0  116.49   11.60
   8  -8   0  110.99   10.50
   8  -8   0  103.29    8.80
   8  -8   0  110.69    9.80
  -8  -8   0  100.59    9.50
  -8   0   1 1128.99   37.90
   8   0  -1 1104.49   37.50
  -8   0  -1 1114.99   37.70
  -8   0  -1 1109.19   37.50
  -8   0   1 1111.69   38.60
  -8   0  -1 1092.39   38.70
   8   0  -1 1082.69   38.50
  -8   0   1 1080.69   37.40
   8   0   1 1079.89   37.60
   8   0  -1 1060.39   37.90
   8   0   1 1106.19   38.60
   8   1  -1 1162.58   40.20
  -8   1   1 1098.29   40.00
  -8  -1  -1 1126.29   40.10
  -8  -1  -1 1179.78   40.90
   8  -1   1 1137.99   41.70
  -8   1   1 1115.69   41.60
  -8   1   1 1214.78   40.30
   8   1  -1 1136.29   40.50
   8  -1   1 1133.49   39.40
   8   1  -1 1134.49   41.00
   8  -1   1 1217.38   40.40
  -8  -1  -1 1140.69   40.60
  -8  -1   1 1210.78   41.00
   8   1   1 1208.48   40.50
  -8  -1   1 1170.78   40.30
   8  -1  -1 1218.98   39.90
   8  -1  -1 1226.98   40.20
   8   1   1 1160.08   40.90
  -8   1  -1 1220.98   40.80
  -8  -1   1 1221.98   40.40
  -8   1  -1 1170.08   39.30
   8  -2   1  992.40   36.50
  -8   2   1  943.81   35.10
  -8  -2  -1 1020.50   34.40
  -8   2   1 1018.60   36.70
   8   2  -1  961.60   36.10
   8  -2   1 1024.80   34.10
   8   2  -1  975.50   33.60
  -8  -2  -1  993.50   34.80
   8  -2   1  992.40   33.70
   8   2  -1 1013.90   33.60
  -8   2   1 1021.90   34.60
   8   2   1 1011.10   34.30
   8  -2  -1 1031.50   34.60
   8  -2  -1  985.50   34.40
  -8   2  -1  988.00   35.80
  -8  -2   1  963.70   35.10
   8   2   1  991.70   36.00
  -8  -3  -1   82.19    3.70
   8  -3   1   75.39    3.80
   8  -3   1   79.49    4.30
  -8  -3  -1   81.29    4.90
   8  -3   1   89.29    6.40
  -8   3   1   78.99    6.20
   8   3  -1   74.69    6.10
  -8   3   1   72.39    5.20
   8  -3  -1   59.59    4.00
   8   3   1   60.39    3.50
  -8   3  -1   62.89    5.50
  -8  -3   1   59.79    4.90
   8   3   1   64.69    5.70
  -8  -4  -1  246.88    9.30
  -8   4   1  231.98   12.60
   8  -4   1  238.38   12.40
  -8   4   1  261.97   12.20
   8   4  -1  246.18   12.90
  -8  -4  -1  233.28   11.10
   8   4   1  251.77    9.50
  -8   4  -1  230.28   12.60
   8   4   1  258.07   12.90
   8  -4  -1  245.98   10.50
  -8  -4   1  241.78   11.60
  -8  -5  -1   74.69    3.80
  -8   5   1   77.59    7.40
   8  -5   1   77.29    7.20
  -8  -5  -1   70.39    6.10
   8   5  -1   66.09    7.40
  -8   5   1   67.99    6.40
   8   5   1   74.29    4.10
   8  -5  -1   73.99    5.50
  -8  -5   1   74.99    6.60
  -8   5  -1   83.39    7.50
  -8   5  -1   75.59    5.40
   8   5   1   73.99    7.40
  -8  -6  -1  123.09    8.30
   8   6  -1  107.49    9.50
   8  -6   1  121.39    9.50
  -8   6   1  114.49    8.80
   8   6   1  111.79    9.80
   8  -6  -1  106.89    7.40
  -8  -6   1   92.99    8.30
  -8   6  -1   99.29    7.10
  -8   6  -1  110.69    9.40
  -8  -7  -1    8.70    4.20
   8   7  -1   12.20    5.10
   8  -7   1    8.20    4.50
   8   7   1    6.10    4.70
   8  -7  -1   10.30    3.60
  -8   7  -1    3.70    4.50
  -8  -7   1   11.20    4.60
   8  -7  -1   10.90    5.00
  -8  -8  -1   96.69    9.10
   8  -8   1   95.39   10.60
   8   8  -1   97.79   11.20
   8  -8   1   95.89    9.70
   8  -8  -1   90.29    8.40
  -8  -8   1   84.99    9.20
   8  -8  -1   96.49   10.30
   8  -8  -1   93.69    9.00
   8   8   1   97.89   11.00
   8   0  -2  159.48    7.20
  -8   0  -2  163.78    6.50
  -8   0   2  157.18    7.50
  -8   0   2  168.88    7.10
  -8   0  -2  156.78    7.70
   8   0  -2  152.58    6.50
   8   0  -2  163.68    7.50
   8   0   2  163.48    6.50
   8   0   2  157.08    7.50
  -8   0  -2  152.48    6.80
  -8   0   2  153.28    6.30
  -8  -1  -2 2558.94   85.79
  -8   1   2 2478.85   86.59
  -8   1   2 2609.04   85.29
  -8  -1  -2 2609.34   85.89
  -8  -1  -2 2554.14   84.99
   8   1  -2 2602.84   85.29
   8   1  -2 2607.14   85.69
   8   1  -2 2477.55   86.09
   8  -1   2 2537.35   86.69
  -8   1   2 2682.33   84.89
  -8   1  -2 2543.45   85.89
  -8  -1   2 2422.36   85.29
  -8  -1   2 2463.85   85.19
   8   1   2 2428.66   85.49
   8  -1  -2 2458.15   84.49
   8   1   2 2375.56   85.59
   8  -1  -2 2513.35   85.29
   8   2  -2 1214.98   39.40
  -8   2   2 1174.18   42.30
   8   2  -2 1146.89   41.80
   8  -2   2 1137.99   42.10
  -8   2   2 1152.48   40.50
  -8  -2  -2 1208.28   40.50
  -8  -2  -2 1165.58   40.30
  -8   2  -2 1154.58   41.70
  -8  -2   2 1186.68   39.60
   8  -2  -2 1163.88   40.30
   8   2   2 1143.49   40.40
   8  -2  -2 1160.68   39.80
  -8  -2   2 1172.88   41.00
   8   2   2 1112.29   41.40
  -8  -3  -2  142.69    7.40
  -8  -3  -2  150.78    7.00
   8  -3   2  152.28    9.00
   8  -3   2  146.89    6.70
  -8   3   2  142.29    9.10
  -8   3   2  149.99    7.80
   8   3  -2  158.38    9.10
   8   3   2  170.08    9.10
   8   3   2  171.98    7.20
   8  -3  -2  187.58    7.60
   8  -3  -2  180.78    7.50
  -8  -3   2  176.98    8.60
  -8   3  -2  163.58    9.10
  -8   4   2   37.20    4.30
  -8  -4  -2   35.10    3.90
   8  -4   2   44.20    3.70
   8   4  -2   44.80    5.60
  -8  -4  -2   38.30    3.00
  -8   4   2   34.00    4.90
   8  -4   2   45.30    5.30
  -8   4  -2   37.20    3.40
  -8   4  -2   45.90    5.80
   8   4   2   43.20    5.30
   8  -4  -2   38.70    3.90
   8   4   2   41.00    3.30
  -8  -4   2   36.10    4.50
  -8   5   2  230.28   11.70
  -8   5   2  218.88   12.80
  -8  -5  -2  223.48   10.90
   8  -5   2  225.68   12.50
  -8  -5  -2  223.58    9.30
   8   5  -2  239.18   13.20
   8  -5  -2  220.38   10.60
  -8   5  -2  212.98   10.20
  -8   5  -2  208.08   12.80
  -8  -5   2  210.18   11.80
   8   5   2  217.78   12.70
   8   5   2  219.58    9.70
   8   6  -2  138.19   10.80
   8  -6   2  146.09   10.70
  -8  -6  -2  137.09    8.90
  -8   6   2  124.19   10.30
  -8   6   2  140.99    9.60
  -8   6  -2  146.49   11.20
   8   6   2  144.39   11.00
   8  -6  -2  135.19    8.50
   8   6   2  141.59    7.30
  -8   6  -2  141.09    8.40
  -8  -6   2  135.09    9.60
   8   7  -2  153.78   12.40
  -8  -7  -2  169.48   10.80
   8  -7   2  171.48   12.00
  -8   7   2  162.08   12.30
   8  -7  -2  191.88   11.10
   8   7   2  175.08   12.80
  -8   7  -2  142.49   12.40
  -8  -7   2  156.98   11.20
  -8   7  -2  166.58   10.10
   8  -7  -2  174.78   10.50
   8   8  -2    6.20    5.00
  -8  -8  -2    7.20    4.30
   8  -8   2   11.80    5.00
  -8   8  -2   13.40    4.00
  -8  -8   2    7.80    4.70
   8  -8  -2    5.40    3.80
   8  -8  -2   14.30    4.60
   8  -8  -2   12.80    5.70
   8   8   2   11.90    5.30
   8   0   3 1010.30   35.30
  -8   0   3 1008.30   36.80
  -8   0   3 1044.80   35.30
   8   0  -3 1043.00   36.70
  -8   0  -3 1013.30   36.00
   8   0  -3 1085.39   36.70
   8   0   3  999.90   36.80
   8   0  -3 1063.99   35.70
  -8   0  -3 1032.50   35.60
   8   1  -3 1321.47   45.10
  -8   1   3 1320.87   46.10
   8   1  -3 1277.47   45.40
  -8   1   3 1378.66   43.80
   8   1  -3 1340.17   44.70
  -8  -1  -3 1354.96   45.50
   8  -1   3 1285.17   45.90
  -8  -1  -3 1321.77   45.10
  -8  -1  -3 1282.77   44.20
  -8  -1   3 1259.77   44.70
  -8   1  -3 1263.57   45.20
   8  -1  -3 1289.27   43.60
   8   1   3 1224.48   44.90
  -8  -1   3 1263.67   44.40
   8  -1  -3 1199.08   44.60
   8   1   3 1251.27   44.80
  -8   2   3 2544.25   89.29
  -8  -2  -3 2538.65   86.89
   8  -2   3 2511.55   88.79
   8   2  -3 2626.14   86.59
   8   2  -3 2535.45   88.69
  -8  -2  -3 2636.44   87.69
  -8   2   3 2595.94   86.89
   8  -2  -3 2671.73   86.19
   8   2   3 2561.44   88.29
  -8  -2   3 2550.34   86.69
  -8   2  -3 2626.54   88.89
   8   2   3 2585.44   87.69
  -8  -2   3 2495.85   87.79
   8  -2  -3 2545.15   87.29
   8  -3   3  418.66   18.80
  -8   3   3  419.16   17.00
   8   3  -3  437.66   15.60
   8   3  -3  415.36   18.80
  -8  -3  -3  430.36   16.90
  -8  -3  -3  412.06   17.00
  -8   3   3  409.86   19.00
   8  -3   3  444.16   16.00
  -8   3  -3  457.45   19.30
  -8  -3   3  472.35   15.70
   8  -3  -3  477.05   17.30
  -8   3  -3  467.55   16.00
  -8  -3   3  479.45   18.40
   8   3   3  471.25   17.40
   8  -3  -3  475.15   16.40
   8   3   3  466.05   18.80
  -8  -4  -3   33.20    3.70
  -8   4   3   35.40    5.30
   8  -4   3   39.90    5.00
   8  -4   3   33.00    3.30
  -8   4   3   35.40    4.00
   8   4  -3   33.50    5.10
   8   4   3   47.50    4.00
  -8   4  -3   38.70    5.70
  -8  -4   3   48.90    5.40
   8   4   3   50.99    5.70
  -8   4  -3   44.10    3.40
   8  -4  -3   40.30    4.30
   8   5  -3  112.59    8.90
   8  -5   3  122.19    8.50
  -8   5   3  113.09    9.10
  -8  -5  -3  117.09    7.00
  -8   5   3  102.49    7.20
  -8   5  -3   83.09    8.50
  -8  -5   3   95.79    7.90
  -8   5  -3   94.99    6.10
   8  -5  -3  105.99    7.00
   8   5   3  101.29    8.60
   8   5   3   92.39    6.20
   8   6  -3  108.69    9.70
  -8  -6  -3   99.39    7.40
  -8   6   3  111.69    9.80
   8  -6   3  104.19    8.70
   8   6   3   94.29    6.60
  -8   6  -3   92.39    6.80
  -8   6  -3   93.19   10.20
   8   6   3   94.49    9.30
  -8  -6   3   91.39    8.60
   8  -6  -3   92.79    7.30
   8  -6  -3  100.89    7.50
   8   7  -3  129.09   11.30
  -8   7   3  116.69   10.80
  -8  -7  -3  122.09    9.10
   8  -7   3  107.29   10.00
  -8   7  -3  144.39    8.90
   8  -7  -3  126.29    9.00
   8  -7  -3  127.39    9.30
  -8  -7   3  134.29   10.80
   8   7   3  135.09   11.30
  -8   7  -3  136.99   12.20
   8   8  -3    2.40    4.60
   8  -8   3    6.30    4.30
  -8  -8  -3   -0.90    3.50
   8  -8  -3    1.10    3.40
  -8  -8   3    1.40    4.50
   8   8   3    5.90    4.90
   8  -8  -3    5.70    3.60
   8   0  -4 1767.02   59.69
   8   0  -4 1779.12   60.89
  -8   0  -4 1730.23   60.09
  -8   0   4 1795.02   59.19
  -8   0  -4 1722.03   59.09
   8   0   4 1750.32   61.09
  -8   0   4 1722.13   60.99
  -8   0  -4 1748.33   59.69
   8   1  -4  808.22   28.20
  -8   1   4  813.72   26.70
  -8   1   4  756.52   29.40
  -8  -1  -4  777.52   27.50
  -8  -1  -4  792.72   28.40
   8  -1   4  747.33   29.10
   8   1  -4  787.82   29.00
  -8  -1   4  764.22   28.30
  -8   1  -4  793.92   26.40
   8   1   4  792.22   28.00
   8  -1  -4  799.32   26.80
  -8   1  -4  761.92   28.60
  -8   1  -4  787.22   26.60
  -8  -1   4  766.72   27.70
   8   1   4  770.12   28.60
   8  -1  -4  734.33   28.10
  -8  -2  -4  152.88    7.00
   8   2  -4  160.38    7.10
   8   2  -4  149.99    8.60
   8  -2   4  148.89    8.60
  -8   2   4  163.98    6.60
  -8   2   4  165.68    9.40
  -8  -2   4  160.38    7.30
  -8   2  -4  151.08    8.80
   8   2   4  165.28    8.30
  -8  -2   4  166.08    8.10
   8  -2  -4  163.98    6.00
   8  -2  -4  166.38    7.70
   8   2   4  160.98    8.10
   8  -3   4   34.50    4.70
   8   3  -4   35.00    2.50
   8   3  -4   27.00    4.20
   8  -3   4   32.80    2.10
  -8   3   4   29.00    4.70
  -8   3   4   32.20    3.00
  -8  -3  -4   29.60    3.00
  -8  -3   4   31.40    2.60
  -8   3  -4   29.10    4.70
  -8   3  -4   24.10    2.30
  -8  -3   4   29.40    4.10
   8   3   4   24.20    3.80
   8   3   4   33.30    3.90
   8  -3  -4   30.60    3.50
   8  -3  -4   25.00    2.20
  -8   4   4  446.96   18.20
   8   4  -4  495.25   16.80
  -8   4   4  448.26   21.00
   8  -4   4  487.15   20.50
   8   4  -4  444.46   20.60
  -8  -4  -4  446.96   18.00
   8  -4   4  471.45   17.50
  -8  -4   4  475.15   20.00
   8  -4  -4  482.55   18.80
   8   4   4  456.15   18.80
  -8  -4   4  474.55   16.70
   8  -4  -4  492.05   17.60
  -8   4  -4  474.85   17.60
   8   4   4  464.75   20.20
  -8   4  -4  452.95   21.30
  -8   5   4    6.40    4.10
  -8  -5  -4    5.90    2.60
   8   5  -4    7.60    3.80
   8  -5   4    6.90    3.40
   8  -5  -4    8.00    2.50
  -8  -5   4    6.60    3.20
  -8   5  -4   -0.80    3.30
   8  -5  -4    9.50    2.90
  -8   5  -4    5.40    2.30
   8   5   4    8.90    2.80
   8   5   4   11.60    3.90
  -8   6   4  156.08   11.80
  -8  -6  -4  141.79    8.90
   8  -6   4  137.09   10.30
   8   6  -4  142.79   11.60
  -8   6  -4  161.48    8.90
   8   6   4  150.28    9.10
   8  -6  -4  182.38   10.10
  -8   6  -4  156.18   12.40
   8  -6  -4  155.18    8.90
  -8  -6   4  149.29   11.00
   8   6   4  166.78   11.60
   8   7  -4   37.80    7.00
  -8   7   4   40.30    7.50
   8  -7   4   27.50    5.90
  -8  -7  -4   33.90    5.10
   8  -7  -4   41.90    5.80
   8   7   4   34.30    6.60
  -8  -7   4   37.50    6.80
  -8   7  -4   47.50    6.00
  -8   7  -4   29.80    7.00
   8  -7  -4   44.70    5.30
  -8  -8  -4   41.20    5.90
  -8   8   4   24.70    6.80
   8   8  -4   36.80    7.50
   8  -8   4   37.20    6.90
   8   8   4   50.39    8.40
  -8   8  -4   27.70    7.50
  -8  -8   4   41.40    7.40
   8  -8  -4   32.40    5.80
  -8   0   5 2787.52   92.29
   8   0  -5 2674.93   94.19
  -8   0   5 2756.32   94.69
  -8   0  -5 2743.73   92.99
  -8   0  -5 2738.13   92.29
  -8   0  -5 2768.72   93.69
   8   0  -5 2761.42   92.79
   8   0   5 2753.82   94.59
   8  -1   5  639.54   25.20
  -8  -1  -5  608.54   23.40
   8   1  -5  687.63   25.30
  -8   1   5  646.04   25.60
  -8  -1  -5  641.84   23.60
  -8   1   5  653.93   22.30
  -8   1  -5  650.13   22.80
  -8  -1   5  661.83   23.70
  -8  -1   5  664.43   24.70
   8   1   5  625.24   24.80
   8  -1  -5  670.23   24.50
  -8   1  -5  649.74   24.80
   8  -1  -5  668.53   22.60
  -8  -2  -5 1018.90   34.90
   8   2  -5 1003.00   35.50
   8   2  -5 1021.60   37.30
   8  -2   5 1021.60   37.30
  -8   2   5 1044.10   38.00
   8  -2   5 1044.30   33.80
  -8  -2   5  973.40   35.70
   8   2   5  974.00   36.60
  -8  -2   5  981.90   36.10
  -8   2  -5  997.40   34.10
  -8   2  -5  978.50   37.30
   8   2   5  967.00   36.10
   8  -2  -5  957.90   35.70
  -8   3   5  435.46   19.40
  -8  -3  -5  413.36   16.00
   8  -3   5  426.76   18.60
   8   3  -5  442.46   16.20
   8  -3   5  417.46   14.90
   8   3  -5  440.26   18.80
   8  -3  -5  425.56   14.60
  -8  -3   5  426.66   16.20
   8   3   5  405.86   17.60
   8  -3  -5  413.96   16.90
  -8  -3   5  416.26   17.80
  -8   3  -5  416.76   15.50
  -8   3  -5  426.36   19.10
   8   3   5  408.76   17.80
   8   4  -5  512.95   22.30
  -8   4   5  503.05   22.60
  -8  -4  -5  523.15   19.10
   8   4  -5  538.75   18.80
   8  -4   5  516.95   21.80
   8  -4   5  505.35   18.50
  -8   4  -5  490.25   22.80
   8   4   5  484.95   21.40
  -8  -4   5  502.15   18.60
   8  -4  -5  505.25   18.50
   8  -4  -5  494.15   20.10
  -8  -4   5  486.85   21.30
   8   4   5  484.55   20.60
  -8   4  -5  492.95   18.80
   8  -4  -5  495.85   18.00
   8   5  -5  153.58   10.80
   8  -5   5  153.98   10.20
  -8   5   5  176.28   11.90
  -8  -5  -5  162.18    8.10
  -8  -5   5  150.98   10.40
   8   5   5  149.59   10.40
   8   5   5  155.88    9.20
  -8   5  -5  146.99    8.10
   8  -5  -5  149.59    9.00
  -8  -5   5  157.18    6.70
   8  -5  -5  151.98    7.70
  -8   5  -5  140.39   11.50
  -8   6   5    6.80    4.40
   8  -6   5    5.70    3.90
   8   6  -5    0.00    3.50
  -8  -6  -5    4.60    2.90
   8  -6  -5    2.40    2.40
   8   6   5    2.40    3.80
   8   6   5   -0.70    2.80
   8  -6  -5    0.60    3.00
  -8   6  -5    3.80    4.10
  -8  -6   5    4.10    3.70
  -8   6  -5    3.10    2.60
  -8   7   5   14.80    5.90
  -8  -7  -5   20.80    4.20
   8   7  -5   17.60    5.80
   8  -7   5   28.50    5.80
   8   7   5   20.00    5.80
  -8  -7   5   13.70    5.10
   8  -7  -5   15.10    4.60
  -8   7  -5   16.50    6.60
  -8   0  -6  210.18    8.30
  -8   0   6  198.48    8.10
  -8   0   6  200.38   10.40
   8   0   6  207.38   10.40
   8   0  -6  189.58   10.10
  -8   0  -6  203.18    9.50
  -8   0  -6  209.38    9.10
  -8   0   6  220.98    9.10
   8  -1   6   82.09    6.30
  -8  -1  -6   90.69    5.40
   8   1  -6   94.69    6.70
  -8   1   6   77.09    3.60
  -8   1   6   89.29    4.20
  -8  -1  -6   83.59    5.20
  -8   1   6   73.99    6.70
  -8  -1   6  119.19    6.80
  -8  -1   6  108.19    5.60
  -8   1  -6   98.39    4.70
   8  -1  -6  103.59    6.30
   8   1   6  103.99    6.60
  -8   1  -6  105.09    6.60
  -8   1  -6  112.69    5.00
   8   2  -6 1558.04   54.89
   8  -2   6 1506.85   51.29
  -8  -2  -6 1484.05   52.19
  -8   2   6 1515.75   55.49
  -8  -2  -6 1515.65   53.19
   8  -2   6 1494.45   54.69
  -8   2  -6 1560.54   51.69
   8  -2  -6 1523.95   53.39
  -8  -2   6 1489.55   53.39
   8   2   6 1529.05   54.49
  -8  -2   6 1537.65   53.49
  -8   2  -6 1460.55   54.69
   8   3  -6  817.12   32.10
  -8  -3  -6  833.62   29.00
  -8   3   6  805.92   32.60
   8  -3   6  792.42   31.50
   8  -3   6  817.32   27.90
   8  -3  -6  801.92   30.20
  -8  -3   6  830.52   29.80
  -8   3  -6  794.82   28.60
  -8  -3   6  782.22   30.90
  -8   3  -6  840.42   32.70
   8   3   6  787.02   31.10
   8   4  -6   11.90    4.10
  -8  -4  -6   13.70    2.60
  -8   4   6    9.60    4.40
   8  -4   6   11.60    3.70
   8  -4   6    9.60    1.90
   8  -4  -6   12.20    3.30
   8  -4  -6   15.90    1.60
   8  -4  -6   12.20    1.30
  -8  -4   6   13.00    3.70
   8   4   6   13.10    3.60
  -8  -4   6   20.00    2.90
   8   4   6   14.20    3.70
  -8   4  -6   10.00    4.20
  -8   4  -6   17.50    2.60
  -8   5   6  291.37   17.20
   8   5  -6  299.07   16.60
  -8  -5  -6  315.97   13.30
   8  -5   6  300.57   15.90
   8  -5  -6  329.27   12.40
   8   5   6  326.87   15.50
  -8   5  -6  317.37   18.00
  -8  -5   6  317.77   16.30
  -8   5  -6  307.57   13.50
   8  -5  -6  321.17   14.80
   8   5   6  320.77   16.30
  -8  -5   6  317.87   12.80
  -8   6   6    5.20    4.70
  -8  -6  -6   12.80    3.20
   8  -6   6   10.50    4.30
   8   6  -6   16.80    5.10
  -8  -6   6   11.40    4.70
   8   6   6    4.70    3.80
   8  -6  -6    7.10    3.70
  -8   6  -6   -0.70    4.20
   8   6   6    8.90    3.90
   8  -7   6  137.49   10.90
  -8   7   6  125.19   12.10
   8   7  -6  144.79   12.20
  -8  -7  -6  135.89    8.60
   8   7   6  136.19   11.30
   8  -7  -6  129.29   10.20
  -8  -7   6  127.39   11.40
  -8   7  -6  104.69   13.00
  -8   0   7   71.39    4.50
  -8   0   7   70.99    3.90
  -8   0  -7   72.49    4.30
   8   0  -7   68.29    5.90
  -8   0  -7   70.69    5.30
   8   0   7   79.19    6.40
  -8   0   7   75.49    6.50
  -8   1   7  143.59    9.50
  -8  -1  -7  156.68    7.90
   8   1  -7  146.19    9.30
   8  -1   7  161.18    9.40
  -8  -1  -7  156.48    7.60
  -8   1  -7  179.48    9.60
   8   1   7  160.68    9.40
  -8   1  -7  165.08    7.30
  -8  -1   7  163.38    7.80
  -8  -1   7  164.08    9.20
   8  -1  -7  169.08    9.00
   8  -2   7   34.00    2.80
   8  -2   7   28.80    4.50
  -8  -2  -7   32.50    4.00
   8   2  -7   35.40    5.20
  -8  -2  -7   32.80    3.40
  -8   2   7   27.00    4.80
   8  -2  -7   36.70    4.30
  -8  -2   7   43.10    4.80
  -8  -2   7   40.70    4.50
  -8   2  -7   41.30    3.30
  -8   2  -7   41.30    5.30
   8   2   7   30.20    4.70
   8   3  -7  370.96   17.30
   8  -3   7  360.86   16.60
  -8   3   7  384.46   18.20
  -8  -3  -7  383.76   14.10
  -8  -3  -7  374.06   15.80
   8  -3   7  373.36   13.00
  -8  -3   7  323.47   15.70
  -8   3  -7  338.77   13.80
  -8  -3   7  322.77   14.90
   8   3   7  311.57   16.20
  -8   3  -7  336.77   17.30
   8  -3  -7  309.17   15.00
   8   4  -7   23.60    5.30
   8  -4   7   22.00    5.00
  -8  -4  -7   31.30    3.50
  -8  -4  -7   26.90    4.90
  -8   4   7   38.20    6.40
  -8   4  -7   33.80    3.70
  -8   4  -7   33.20    6.20
   8   4   7   31.80    5.20
   8  -4  -7   29.60    4.50
  -8  -4   7   32.20    4.00
  -8  -4   7   39.70    5.60
  -8  -5  -7  188.08   12.00
  -8  -5  -7  199.28    9.30
   8  -5   7  191.58   12.00
   8   5  -7  203.48   13.40
  -8   5   7  201.78   13.80
   8  -5  -7  191.88   11.10
   8   5   7  185.68   11.60
  -8  -5   7  193.68   12.30
  -8   5  -7  186.28   13.80
  -8  -5   7  195.48   10.20
  -8  -6  -7   11.00    3.20
   8  -6   7    9.10    4.20
  -8   6   7    6.50    4.70
   8   6  -7    7.00    4.70
  -8  -6  -7   10.10    4.90
  -8   6  -7   12.60    5.50
  -8  -6   7   12.40    4.90
   8  -6  -7    4.80    3.80
   8   6   7    6.70    4.10
   8   7  -7   86.89   10.80
  -8  -7  -7   86.99    9.60
  -8  -7  -7   97.29    6.90
  -8   7   7   97.29   11.70
   8  -7   7   75.99    9.00
  -8   7  -7   81.89   11.40
   8  -7  -7  105.99    9.50
  -8  -7   7   92.39   10.30
  -8   0   8  472.85   20.70
  -8   0   8  467.45   17.60
   8   0   8  480.25   20.60
  -8   0  -8  479.05   17.70
  -8   0  -8  465.95   19.20
  -8   0   8  461.55   17.00
   8   0  -8  440.56   19.80
   8   1  -8   59.99    6.30
  -8  -1  -8   67.59    5.00
  -8   1   8   70.19    7.70
  -8  -1  -8   74.19    5.30
   8  -1   8   69.79    6.60
  -8  -1   8   65.09    4.80
  -8  -1   8   60.59    6.00
   8  -1  -8   66.39    6.00
  -8   1  -8   59.89    6.20
   8   1   8   64.49    6.70
  -8   1  -8   70.69    4.60
   8   2  -8  611.14   24.90
  -8   2   8  596.84   25.60
  -8  -2  -8  602.34   22.50
   8  -2   8  605.94   24.70
  -8  -2  -8  577.64   21.90
  -8   2  -8  563.64   24.50
  -8  -2   8  555.24   23.50
  -8   2  -8  563.44   21.60
   8  -2  -8  581.24   23.20
  -8  -2   8  553.84   22.70
   8   2   8  541.95   24.20
  -8  -3  -8    8.80    2.40
   8   3  -8    3.80    3.10
   8  -3   8    4.30    3.40
  -8  -3  -8    5.40    3.20
  -8   3   8    4.90    3.70
  -8  -3   8    5.60    3.00
  -8  -3   8    6.90    3.30
   8   3   8    5.60    3.50
   8  -3  -8    6.40    3.10
  -8   3  -8    7.70    4.40
  -8   3  -8    8.20    2.30
  -8  -4  -8  161.48   10.30
  -8   4   8  161.38   12.40
   8   4  -8  159.98   11.40
   8  -4   8  160.98   10.90
  -8  -4  -8  165.68    8.10
  -8  -4   8  172.18   11.00
  -8   4  -8  164.68    8.50
   8   4   8  160.78   11.10
  -8   4  -8  159.68   12.30
  -8  -4   8  156.78    9.20
   8  -4  -8  151.28   10.10
  -8  -5  -8   24.40    3.50
  -8   5   8   24.50    6.80
  -8  -5  -8   25.60    5.40
   8   5  -8   25.90    6.10
   8  -5   8   24.60    5.30
  -8  -5   8   25.90    5.70
   8   5   8   27.80    5.60
  -8   5  -8   31.30    6.90
   8  -5  -8   23.10    4.80
  -8  -6  -8  162.18   11.80
   8  -6   8  130.39   10.90
  -8  -6  -8  147.89    8.20
   8   6  -8  144.49   12.20
  -8   6   8  155.48   13.20
  -8   6  -8  132.09   13.10
   8   6   8  152.38   11.50
  -8  -6   8  149.29   11.80
   8  -6  -8  161.88   10.70
  -8   0  -9  149.29    9.00
  -8   0   9  147.19    6.60
   8   0   9  147.79   10.20
   8   0  -9  149.29    9.70
  -8   0  -9  151.78    7.60
  -8   0   9  148.39   10.00
  -8  -1  -9  267.37   12.40
   8  -1   9  263.07   14.30
  -8  -1  -9  275.27   11.80
   8   1  -9  242.58   13.70
  -8   1   9  278.67   15.20
  -8   1  -9  277.67   11.70
   8  -1  -9  275.27   13.60
  -8  -1   9  253.17   13.90
   8   1   9  277.07   14.40
  -8  -1   9  257.47   11.60
  -8   1  -9  242.38   13.30
   8  -2   9   73.19    7.50
  -8   2   9   92.09    9.00
   8   2  -9   82.99    8.10
  -8  -2  -9   85.29    5.70
  -8  -2  -9   78.39    6.10
  -8  -2   9   73.29    6.30
  -8   2  -9   72.69    7.80
  -8  -2   9   78.49    7.30
   8   2   9   81.29    7.80
   8  -2  -9   66.29    6.60
  -8   2  -9   77.99    5.40
  -8  -3  -9   85.89    7.10
  -8   3   9   70.89    8.80
   8   3  -9   71.59    8.20
   8  -3   9   77.79    8.00
  -8  -3  -9   77.09    5.40
  -8  -3   9   85.39    7.30
  -8   3  -9   78.69    5.60
   8  -3  -9   72.59    6.90
  -8  -3   9   67.39    7.00
   8   3   9   75.59    8.50
  -8   3  -9   62.19    7.90
   8  -4   9  369.46   18.80
  -8  -4  -9  359.36   15.40
  -8  -4  -9  400.96   17.90
  -8   4   9  389.96   21.00
   8   4  -9  405.16   20.10
  -8   4  -9  394.96   20.80
  -8  -4   9  408.66   18.80
   8   4   9  361.86   19.10
  -8  -4   9  364.56   17.10
   8  -4  -9  368.16   17.50
   8  -5   9    4.40    3.90
  -8   5   9    0.30    4.70
  -8  -5  -9   -1.60    2.40
   8   5  -9    5.60    4.30
  -8  -5  -9    3.90    4.10
  -8  -5   9    0.50    3.90
   8   5   9    1.80    3.80
   8  -5  -9   -5.50    3.30
  -8   5  -9    4.70    5.10
  -8  -6  -9   99.19    9.80
   8  -6   9   89.49    9.50
   8   6  -9  103.69   10.90
  -8   6   9   93.89   11.80
   8  -6  -9   82.69    8.90
  -8  -6   9  106.89   10.40
   8   6   9   95.69   10.10
  -8   6  -9   94.29   12.10
   8   0  10  105.99    9.10
  -8   0 -10  130.79    8.80
  -8   0 -10  120.89    7.10
   8   0 -10  117.39    9.10
  -8   0  10  125.39    6.20
  -8   0  10  124.69   10.20
  -8   1  10  212.08   13.50
   8  -1  10  201.98   12.70
  -8  -1 -10  195.18   10.00
  -8  -1 -10  207.98   10.80
   8   1 -10  201.38   12.40
  -8  -1  10  183.88   12.10
  -8  -1  10  199.68    9.70
  -8   1 -10  204.18   10.00
  -8   1 -10  198.88   12.00
   8  -1 -10  203.48   11.90
   8   1  10  212.08   13.00
  -8  -2 -10  124.09    7.50
  -8   2  10  118.79   10.80
   8  -2  10  102.49    9.00
   8   2 -10   96.59    9.00
  -8  -2 -10  112.29    7.60
  -8  -2  10   93.89    8.70
  -8  -2  10  118.29    7.90
  -8   2 -10  105.59    7.00
   8  -2 -10  119.69    8.80
   8   2  10  108.79    9.60
  -8   2 -10  100.69    9.50
   8   3 -10  123.89   10.50
  -8  -3 -10  126.19    8.60
  -8   3  10  137.39   11.90
   8  -3  10  123.19   10.20
  -8  -3 -10  128.79    7.60
  -8   3 -10  129.89   10.80
   8  -3 -10  107.89    8.90
  -8  -3  10  123.49    9.00
   8   3  10  127.09   10.50
  -8  -3  10  116.89    9.20
  -8  -4 -10   87.49    8.70
  -8   4  10   94.29   11.00
   8  -4  10  103.49    9.50
   8   4 -10  108.89   10.40
  -8  -4  10   78.69    8.40
   8   4  10   95.19    9.90
  -8   4 -10   84.79   10.20
  -8  -4  10   85.79    7.80
   8  -4 -10   86.19    8.20
   8  -5  10   24.50    5.90
  -8   5  10   24.70    6.60
  -8  -5 -10   22.10    5.40
   8   5 -10   12.90    5.60
   8  -5 -10   18.00    4.90
  -8  -5  10   31.10    6.30
   8   5  10   26.10    6.30
  -8   5 -10   23.10    6.50
  -8   0  11   10.50    4.70
  -8   0 -11    8.60    2.80
   8   0 -11   12.20    4.30
   8   0  11    5.90    4.10
  -8   0 -11   10.30    3.90
  -8  -1 -11  151.78    9.60
  -8  -1 -11  145.99    8.50
   8  -1  11  145.39   11.40
  -8   1  11  147.09   11.60
   8   1 -11  157.68   11.10
  -8  -1  11  136.39   10.90
   8  -1 -11  156.98   10.70
  -8   1 -11  150.78    8.70
  -8   1 -11  154.98   10.70
   8   1  11  135.79   11.20
  -8  -2 -11   76.19    7.10
   8   2 -11   68.59    8.40
   8  -2  11   79.69    9.20
  -8   2  11   81.99    9.80
  -8  -2 -11   88.79    6.80
  -8  -2  11   72.49    6.70
   8   2  11   83.69    9.60
  -8   2 -11   68.69    8.50
   8  -2 -11   79.39    8.00
  -8   2 -11   72.69    7.00
  -8  -2  11   82.39    8.30
  -8  -3 -11  159.08   10.10
  -8   3  11  165.28   13.50
   8   3 -11  115.19   10.90
   8  -3  11  156.88   11.80
  -8   3 -11  142.29   12.00
   8   3  11  141.29   11.60
   8  -3 -11  138.49   10.20
  -8  -3  11  148.29    9.90
  -8  -3  11  131.29   10.40
   8   4 -11    0.90    4.00
  -8  -4 -11   -3.20    3.40
   8  -4  11   -1.70    3.50
  -8   4  11   -5.60    4.80
  -8   4 -11   -3.70    4.20
  -8  -4  11    2.00    3.70
   8   4  11   -0.90    4.00
   8  -4 -11   -4.30    3.70
  -8  -4  11   -1.70    3.20
  -8  -5 -11   48.90    6.80
   8  -5  11   53.69    8.30
   8   5 -11   49.10    8.50
  -8   5  11   39.40    8.80
  -8   5 -11   43.90    8.80
   8   5  11   37.10    7.40
  -8  -5  11   39.10    6.90
   8  -5 -11   41.50    6.70
   8   0  12   65.49    8.40
  -8   0  12   77.39    9.50
  -8   0 -12   77.09    7.60
   8   0 -12   61.19    7.80
  -8   0 -12   71.89    6.40
  -8  -1 -12  203.98   11.40
   8  -1  12  195.68   13.50
  -8   1  12  197.98   14.30
   8   1 -12  165.88   12.50
  -8  -1 -12  181.38   10.20
   8  -1 -12  167.68   12.00
  -8  -1  12  196.08   13.30
  -8   1 -12  186.58   10.40
   8   1  12  167.38   13.10
  -8   1 -12  170.78   12.20
  -8   2  12  107.79   12.20
   8  -2  12   99.39   10.50
   8   2 -12  100.19   10.20
  -8  -2 -12  107.79    8.30
   8   2  12  111.79   11.00
  -8   2 -12  105.19   10.30
  -8  -2  12  112.99   10.20
   8  -2 -12  111.79    9.70
  -8   3  12   36.20    8.00
  -8  -3 -12   24.30    5.20
   8  -3  12   27.20    6.60
   8   3 -12   14.70    5.70
  -8  -3  12   28.70    6.00
   8  -3 -12   38.50    6.40
  -8  -3  12   30.40    5.40
  -8   3 -12   30.60    7.00
   8   3  12   24.60    6.40
  -8  -4 -12    1.80    4.30
  -8   4  12    7.80    6.20
   8   4 -12    8.00    5.00
   8  -4  12    3.80    4.70
  -8  -4  12    3.80    4.30
  -8  -4  12   10.00    4.20
  -8   4 -12    2.30    4.80
   8   4  12   -1.10    4.60
   8  -4 -12    4.80    4.50
  -8   0  13  114.09   11.30
  -8   0 -13  102.09    8.00
  -8   0 -13  106.09   12.90
   8   0  13  112.69   10.90
   8   0 -13  114.89   10.50
  -8   1  13    0.00    4.60
   8   1 -13   -0.10    3.60
   8  -1  13   -4.00    3.60
  -8  -1 -13   -2.60    2.90
  -8   1 -13   -3.30    3.90
   8  -1 -13    1.60    3.70
  -8  -1  13   -3.80    4.00
   8   1  13    8.00    5.10
  -8  -2 -13    7.40    3.90
   8   2 -13    9.00    4.80
  -8   2  13   13.40    6.50
   8  -2  13   10.00    5.40
   8   2  13   26.50    7.00
  -8   2 -13   21.40    6.30
   8  -2 -13   14.10    5.20
  -8  -2  13   19.90    5.80
   9   0   0   -0.50    1.50
   9   0   0    1.30    1.20
  -9   0   0   -0.10    1.00
   9   0   0   -1.40    0.80
   9   0   0    0.90    1.70
   9  -1   0 1158.58   41.50
  -9   1   0 1173.28   40.10
  -9   1   0 1051.69   39.20
  -9  -1   0 1143.39   39.70
  -9  -1   0 1159.88   40.50
   9   1   0 1169.98   40.10
   9   1   0 1162.08   40.00
   9   1   0 1149.29   40.70
   9  -1   0 1155.38   39.40
   9  -1   0 1213.68   39.70
  -9   2   0   51.99    3.10
   9   2   0   55.59    2.80
  -9  -2   0   49.80    3.80
   9   2   0   53.49    3.00
  -9   2   0   50.89    4.10
   9  -2   0   49.70    3.00
   9   2   0   55.49    4.80
  -9   3   0    1.30    2.20
   9  -3   0    8.60    1.90
   9   3   0    6.60    2.60
   9  -3   0    5.80    1.50
  -9  -3   0    6.70    2.20
   9   4   0   64.29    6.60
  -9  -4   0   71.99    5.70
  -9   4   0   61.89    6.40
   9  -4   0   94.29    7.60
   9  -4   0   66.99    4.50
   9   5   0  161.18   10.60
  -9   5   0  140.19    9.70
   9  -5   0  160.98   10.30
   9  -5   0  152.68    7.80
  -9  -5   0  149.69    9.10
  -9  -6   0    6.30    3.70
   9  -6   0    7.90    4.50
   9  -6   0   10.70    3.00
   9   6   0   13.40    4.80
  -9   6   0    9.70    4.40
   9  -7   0  561.84   27.20
   9   7   0  601.24   27.80
  -9  -7   0  623.34   25.70
   9  -7   0  590.24   24.10
  -9   7   0  580.24   27.10
   9  -8   0    9.80    5.20
   9  -8   0    9.50    4.50
  -9  -8   0   11.20    4.90
   9   8   0   12.30    5.80
   9  -8   0   12.80    4.00
   9   0   1 1063.79   38.10
   9   0  -1 1061.99   38.00
  -9   0  -1 1122.59   38.50
   9   0   1 1066.99   37.10
  -9   0   1 1110.89   37.30
  -9   0   1 1090.79   38.20
  -9   0  -1 1061.89   37.10
  -9   0   1 1075.59   36.90
   9   0  -1 1076.09   36.90
   9   0  -1 1032.50   37.40
  -9   0  -1 1079.59   36.90
   9  -1   1  714.93   26.60
  -9  -1  -1  722.43   24.80
  -9   1   1  755.72   25.00
   9  -1   1  724.93   24.20
  -9  -1  -1  728.53   25.50
  -9   1   1  703.33   26.40
   9   1  -1  693.93   25.80
   9   1  -1  716.03   25.10
  -9  -1  -1  744.23   25.60
  -9   1   1  714.13   24.70
  -9  -1   1  606.64   26.10
   9  -1  -1  719.93   24.60
   9  -1  -1  721.73   24.90
   9   1   1  686.63   25.60
  -9   1  -1  641.94   23.90
   9   1   1  704.83   25.20
  -9   1  -1  708.93   25.40
  -9  -1   1  679.23   24.90
  -9   2   1  604.24   23.40
   9  -2   1  656.03   25.00
  -9   2   1  664.03   22.80
   9  -2   1  622.34   22.10
   9   2  -1  649.64   24.50
  -9   2   1  638.94   24.90
  -9  -2  -1  687.93   22.90
   9  -2   1  656.13   21.80
  -9  -2  -1  624.14   23.00
   9   2  -1  598.14   21.90
   9   2  -1  655.43   22.00
   9  -2  -1  626.34   22.50
   9   2   1  636.44   22.50
   9  -2  -1  640.94   22.70
   9   2   1  617.04   24.20
  -9   2  -1  642.64   24.00
  -9  -2   1  615.54   23.30
   9   3  -1  752.52   29.40
  -9  -3  -1  717.73   27.60
  -9  -3  -1  767.02   26.60
   9  -3   1  754.82   26.50
   9  -3   1  765.42   29.70
   9  -3   1  759.32   27.10
  -9   3   1  748.93   28.40
  -9   3   1  751.12   29.70
   9   3   1  787.32   26.50
   9   3   1  772.42   29.40
  -9   3  -1  778.72   29.30
  -9  -3   1  782.52   28.30
   9  -3  -1  788.72   27.10
   9  -4   1  279.77   11.40
   9  -4   1  298.57   14.60
  -9   4   1  276.27   13.40
  -9  -4  -1  271.87   12.60
   9   4  -1  286.97   14.50
  -9   4   1  273.57   14.30
  -9  -4  -1  298.17   10.70
   9   4   1  297.67   10.80
  -9   4  -1  294.57   14.40
  -9  -4   1  289.37   13.00
   9   4   1  290.77   14.40
   9  -4  -1  296.57   12.00
   9  -5   1  119.99    9.30
  -9  -5  -1  132.49    5.60
   9   5  -1  142.39   10.00
   9  -5   1  135.49    7.10
  -9  -5  -1  125.49    8.10
  -9   5   1  131.69    8.90
  -9   5   1  130.69    9.70
  -9  -5   1  133.99    8.70
   9   5   1  147.39    5.90
  -9   5  -1  135.59    9.70
   9   5   1  139.79    9.90
   9  -5  -1  140.19    7.50
  -9  -6  -1  195.38   10.70
  -9   6   1  172.48   11.20
   9  -6   1  170.88    9.20
   9  -6   1  185.58   12.10
   9   6  -1  185.38   12.40
  -9  -6   1  157.08   10.60
   9   6   1  169.78   12.10
  -9   6  -1  177.68   12.00
   9  -6  -1  170.78    9.40
   9  -7   1   95.79    7.50
   9   7  -1  113.59   10.60
  -9  -7  -1   84.69    8.30
   9  -7   1  120.49   10.50
  -9  -7   1   96.69    9.00
   9  -7  -1   93.29    7.60
   9   7   1  105.49   10.60
  -9   7  -1   81.79    9.80
   9  -7  -1   95.89   10.20
   9   8  -1    0.80    4.80
   9  -8   1    4.80    5.00
  -9  -8  -1    4.10    4.20
   9  -8   1    5.00    3.30
   9   8   1    4.80    4.60
  -9  -8   1   -3.40    3.80
   9  -8  -1    5.80    3.90
   9  -8  -1    9.50    5.40
   9  -8  -1    0.60    3.10
  -9   0  -2 3257.67  106.89
  -9   0   2 3293.07  104.59
  -9   0   2 3095.99  103.59
  -9   0   2 2979.60  104.99
  -9   0  -2 3013.30  104.09
   9   0  -2 3008.50  104.89
   9   0   2 2928.51  103.69
   9   0   2 3181.88  105.29
   9   0  -2 3109.99  104.59
   9   0  -2 3072.29  103.89
  -9   0  -2 3089.89  103.69
   9  -1   2  329.97   13.50
  -9  -1  -2  322.27   12.60
   9   1  -2  305.97   12.00
  -9   1   2  311.97   11.90
  -9   1   2  321.37   13.50
  -9  -1  -2  311.67   12.40
   9   1  -2  291.07   12.70
  -9  -1  -2  291.97   11.70
  -9   1   2  322.17   11.60
  -9  -1   2  298.57   12.10
   9   1   2  301.87   12.20
  -9   1  -2  306.37   12.50
   9  -1  -2  314.07   12.10
   9   1   2  291.77   12.30
  -9  -1   2  300.87   11.90
   9  -1  -2  301.27   11.20
  -9  -2  -2 1701.63   56.89
  -9   2   2 1625.84   56.79
   9   2  -2 1695.73   55.69
   9   2  -2 1655.83   58.19
   9  -2   2 1688.43   58.69
  -9  -2  -2 1637.64   56.49
  -9   2   2 1619.34   58.59
   9   2   2 1667.23   56.69
  -9  -2   2 1680.63   55.99
   9  -2  -2 1609.04   56.49
  -9  -2   2 1625.44   57.09
   9   2   2 1569.34   57.69
  -9   2  -2 1662.83   57.99
   9  -2  -2 1680.33   56.09
  -9   3   2   55.59    5.80
  -9   3   2   52.19    4.40
   9  -3   2   51.79    3.20
   9  -3   2   54.79    5.70
   9  -3   2   51.39    2.80
  -9  -3  -2   50.69    3.50
  -9  -3  -2   53.49    4.10
   9   3  -2   54.99    5.50
   9   3   2   61.49    3.80
  -9   3  -2   54.39    5.50
   9   3   2   51.69    5.20
   9  -3  -2   56.19    3.90
  -9  -3   2   58.49    4.80
  -9  -4  -2  495.05   19.20
  -9  -4  -2  477.45   18.00
   9  -4   2  475.85   18.40
   9   4  -2  474.15   21.10
  -9   4   2  472.65   21.40
  -9   4   2  491.35   19.80
   9  -4   2  469.85   20.90
   9   4   2  493.05   21.10
  -9  -4   2  510.25   20.20
   9  -4  -2  496.85   18.80
   9   4   2  506.45   18.20
  -9   4  -2  482.35   21.30
  -9  -5  -2   54.99    5.30
  -9   5   2   57.29    7.10
   9  -5   2   48.50    6.30
   9   5  -2   56.69    7.20
  -9   5   2   54.59    5.70
  -9  -5  -2   57.39    3.70
   9   5   2   55.09    4.10
   9   5   2   54.49    6.70
  -9   5  -2   57.99    7.40
   9  -5  -2   55.89    5.00
  -9  -5   2   39.40    5.30
  -9   5  -2   55.19    4.40
  -9   6   2    5.40    3.40
  -9   6   2    1.40    3.90
   9   6  -2    3.30    4.10
   9  -6   2    7.20    4.20
  -9  -6  -2    6.50    3.20
   9   6   2   13.80    4.90
   9  -6  -2   15.40    3.40
  -9  -6   2    8.90    4.10
  -9   6  -2   13.30    4.80
  -9   6  -2   15.90    3.10
   9  -7   2   13.00    4.70
   9   7  -2   17.30    5.50
  -9  -7  -2   11.00    3.90
   9   7   2   15.60    5.30
   9  -7  -2    5.80    3.40
   9  -7  -2   14.10    4.20
  -9   7  -2   11.00    5.30
  -9  -7   2   12.80    4.90
   9   8  -2   62.69    9.60
   9  -8   2   54.99    8.10
  -9  -8  -2   45.70    6.70
  -9  -8   2   51.99    7.60
   9  -8  -2   72.79    9.90
   9  -8  -2   55.59    6.60
   9   8   2   61.59    9.20
   9  -8  -2   61.39    7.30
  -9   0  -3 1335.07   46.70
   9   0  -3 1405.76   46.40
   9   0  -3 1152.78   48.00
  -9   0   3 1389.56   46.00
   9   0  -3 1364.56   47.40
   9   0   3 1398.26   47.80
  -9   0   3 1365.06   47.70
   9   0   3 1358.06   46.10
  -9   0  -3 1393.26   46.30
   9  -1   3  659.03   25.10
   9   1  -3  641.64   24.50
   9   1  -3  647.24   23.60
  -9  -1  -3  621.94   23.90
  -9   1   3  668.03   22.80
  -9   1   3  625.74   24.90
  -9  -1  -3  626.74   23.20
   9   1   3  645.94   23.80
   9  -1  -3  675.93   22.70
   9  -1  -3  656.83   23.90
  -9  -1   3  670.33   23.50
  -9   1  -3  673.33   24.40
   9   1   3  654.73   24.10
  -9  -1   3  667.43   23.90
   9   2  -3  608.34   22.50
   9  -2   3  576.54   22.60
   9   2  -3  622.94   20.20
  -9  -2  -3  596.04   20.50
  -9  -2  -3  609.84   22.30
  -9   2   3  573.14   22.80
  -9   2   3  607.34   20.60
   9  -2  -3  533.75   19.60
   9   2   3  521.95   20.90
  -9   2  -3  548.95   22.20
  -9  -2   3  527.95   21.10
  -9  -2   3  528.55   20.20
   9  -2  -3  514.75   20.60
   9   2   3  521.65   21.60
  -9   3   3  144.99    9.20
   9  -3   3  130.99    8.50
   9  -3   3  143.19    5.50
  -9   3   3  146.49    7.10
  -9  -3  -3  137.99    6.90
  -9  -3  -3  142.29    6.90
   9   3  -3  140.29    8.60
  -9  -3   3  131.49    7.70
   9   3   3  131.09    8.10
   9  -3  -3  130.79    6.90
   9   3   3  127.69    6.80
   9  -3  -3  132.89    6.00
  -9   3  -3  119.39    8.40
  -9  -3   3  133.09    5.30
   9  -4   3  504.55   18.30
   9  -4   3  482.05   21.10
  -9   4   3  498.15   19.50
  -9   4   3  483.85   21.70
  -9  -4  -3  487.75   19.00
   9   4  -3  520.75   21.70
  -9  -4   3  486.05   20.40
  -9   4  -3  485.55   18.10
  -9   4  -3  470.95   21.70
   9   4   3  502.85   19.00
   9   4   3  485.65   21.10
   9  -4  -3  486.55   19.10
   9   5  -3  180.48   11.40
  -9   5   3  177.38   11.70
  -9   5   3  176.78    9.60
   9  -5   3  167.88   10.60
  -9  -5  -3  182.48    9.10
   9   5   3  148.99   10.60
   9   5   3  153.08    8.20
  -9   5  -3  159.98    8.10
  -9  -5   3  164.48   10.30
   9  -5  -3  157.98    8.80
  -9   5  -3  153.08   11.40
   9  -6   3  222.68   13.60
   9   6  -3  220.78   14.70
  -9   6   3  235.38   14.80
  -9  -6  -3  245.48   12.30
   9   6   3  246.58   11.30
  -9   6  -3  253.67   11.60
  -9   6  -3  246.88   15.40
  -9  -6   3  248.18   13.90
   9  -6  -3  240.38   12.20
   9   6   3  246.88   14.70
  -9   7   3   23.00    6.10
   9  -7   3   15.10    4.90
  -9  -7  -3   15.80    4.20
   9   7  -3   10.10    5.10
   9   7   3   15.20    5.30
   9  -7  -3   18.70    4.10
  -9   7  -3   20.10    4.00
   9  -7  -3   17.10    4.20
  -9   7  -3   19.30    5.80
  -9  -7   3   15.90    5.20
  -9  -8  -3   84.09    8.00
   9   8  -3   91.19   11.30
   9  -8   3  100.69    9.90
   9  -8  -3   88.09    8.20
   9  -8  -3   90.09    8.70
   9   8   3   75.79    9.90
  -9   8  -3   80.19   11.00
  -9  -8   3   93.49   10.40
  -9   0  -4  637.44   22.10
   9   0   4  608.84   24.00
  -9   0   4  621.04   24.10
   9   0  -4  640.94   22.70
  -9   0  -4  641.74   22.60
  -9   0   4  638.04   22.20
   9   0  -4  648.44   24.00
  -9   0  -4  615.24   23.10
  -9  -1  -4 1661.23   56.69
  -9   1   4 1753.42   55.89
  -9   1   4 1653.33   58.69
   9   1  -4 1687.73   58.19
   9   1  -4 1676.63   57.19
  -9  -1  -4 1606.44   57.39
   9  -1   4 1675.33   58.59
   9  -1  -4 1665.83   55.89
  -9   1  -4 1608.44   57.79
  -9  -1   4 1648.14   56.79
   9  -1  -4 1594.44   57.39
  -9  -1   4 1615.44   57.39
   9   1   4 1649.93   57.09
   9   1   4 1662.43   57.79
  -9  -2  -4  303.67   12.00
  -9   2   4  306.77   14.40
   9   2  -4  295.27   13.80
  -9   2   4  311.67   11.70
   9  -2   4  330.37   14.40
   9   2  -4  315.67   12.10
  -9  -2   4  290.27   12.20
  -9   2  -4  304.77   13.90
   9  -2  -4  300.47   11.00
   9   2   4  321.77   13.40
   9   2   4  321.87   13.20
   9  -2  -4  293.07   12.60
  -9  -2   4  305.87   12.90
   9   3  -4  888.01   35.10
   9   3  -4  931.21   32.00
  -9   3   4  923.11   32.60
   9  -3   4  913.21   35.20
  -9  -3  -4  920.31   32.70
  -9   3   4  908.31   35.70
   9   3   4  912.81   34.60
  -9  -3   4  944.61   32.20
   9  -3  -4  926.41   33.30
   9   3   4  906.71   33.70
  -9   3  -4  945.81   35.60
  -9  -3   4  915.11   34.20
   9  -3  -4  948.61   31.70
   9   4  -4   57.89    6.60
  -9  -4  -4   60.19    4.70
  -9   4   4   65.59    4.90
   9  -4   4   71.59    4.00
  -9   4   4   69.89    6.90
   9  -4   4   59.09    6.40
   9   4   4   77.59    6.90
  -9  -4   4   66.69    6.30
   9  -4  -4   71.29    5.50
  -9   4  -4   61.59    7.30
  -9   4  -4   72.29    4.10
   9   4   4   75.29    5.50
  -9   5   4  277.47   15.70
   9   5  -4  280.07   15.40
   9  -5   4  281.77   14.70
  -9  -5  -4  303.87   12.70
  -9  -5   4  268.67   14.50
   9   5   4  271.37   14.90
  -9   5  -4  278.57   11.90
   9   5   4  292.77   13.00
  -9   5  -4  266.77   15.90
   9  -5  -4  292.37   13.20
  -9  -6  -4  114.79    7.80
   9  -6   4  114.59    9.50
  -9   6   4  116.99   10.60
   9   6  -4  114.39   10.40
  -9   6  -4  118.59   11.10
   9   6   4  124.99   10.30
  -9  -6   4  128.89   10.20
   9  -6  -4  129.09    8.70
   9   6   4  119.49    7.80
  -9   6  -4  121.49    7.50
   9  -6  -4  127.29    7.90
   9   7  -4    9.50    5.10
  -9  -7  -4    7.50    3.60
   9  -7   4    6.10    4.40
  -9   7   4    7.60    5.00
  -9  -7   4    7.40    4.60
  -9   7  -4    9.60    5.10
   9  -7  -4   11.30    3.40
   9  -7  -4    3.50    3.70
   9   7   4   13.80    5.20
  -9  -8  -4   16.80    4.60
  -9   8   4   27.10    6.90
   9  -8   4   16.50    5.40
   9   8  -4   21.60    6.60
  -9   8  -4   23.30    7.40
  -9  -8   4    9.50    5.40
   9   8   4   13.10    6.10
   9  -8  -4   22.50    5.20
  -9   0  -5  113.99    5.30
  -9   0  -5  122.29    6.50
   9   0  -5  121.89    5.90
  -9   0   5  125.79    5.40
   9   0  -5  124.09    7.20
  -9   0   5  126.89    7.50
   9   0   5  125.19    7.30
  -9   0  -5  116.49    6.00
  -9   1   5 1040.60   36.10
  -9   1   5 1037.30   39.50
  -9  -1  -5 1055.09   37.40
   9  -1   5 1024.60   39.00
   9   1  -5 1110.69   39.20
  -9  -1  -5 1041.70   37.40
  -9   1  -5 1060.69   36.40
  -9  -1   5 1094.79   38.60
   9  -1  -5 1116.79   36.50
  -9   1  -5 1085.99   38.70
   9  -1  -5 1064.49   38.40
  -9  -1   5 1070.99   37.40
   9   1   5 1033.60   38.70
   9   2  -5  142.09    8.60
   9  -2   5  143.79    8.70
  -9   2   5  134.79    8.70
  -9  -2  -5  131.19    6.60
  -9   2   5  136.99    5.70
   9   2  -5  124.59    7.30
   9   2   5  137.99    7.70
  -9   2  -5  143.39    8.70
  -9  -2   5  136.79    7.60
   9  -2  -5  142.79    5.40
   9  -2  -5  158.08    7.70
   9   2   5  142.89    8.00
  -9  -2   5  143.59    7.30
  -9   3   5  129.69    9.10
   9   3  -5  121.79    8.40
  -9   3   5  128.69    5.50
  -9  -3  -5  132.99    6.20
   9  -3   5  124.79    4.50
   9  -3   5  126.09    8.30
   9   3  -5  124.79    5.90
   9   3   5   99.99    7.10
  -9   3  -5  104.89    4.80
  -9  -3   5  108.39    5.90
  -9   3  -5   96.99    8.20
  -9  -3   5  101.49    7.20
   9   3   5  103.89    7.30
   9  -3  -5  101.49    4.50
   9  -4   5  171.78   10.60
   9   4  -5  162.48   10.80
  -9  -4  -5  188.18    8.50
  -9   4   5  163.68   11.10
   9  -4   5  183.28    7.30
   9   4  -5  202.48    7.80
   9  -4  -5  168.88    7.10
   9   4   5  167.08   10.50
  -9  -4   5  167.48   10.20
  -9  -4   5  174.98    7.60
  -9   4  -5  165.08    7.60
   9  -4  -5  163.38    9.00
  -9   4  -5  156.68   11.40
   9   4   5  167.98    9.50
   9   5  -5  123.29   10.20
   9  -5   5  104.99    8.90
  -9   5   5  132.09   10.60
  -9  -5  -5  122.09    7.20
   9   5   5  134.79    8.30
  -9   5  -5  128.89    6.90
  -9  -5   5  125.89    9.40
   9  -5  -5  130.79    8.20
  -9   5  -5  128.99   10.90
   9   5   5  137.49   10.00
   9  -5  -5  133.59    7.00
   9   6  -5   84.09    9.60
  -9   6   5   75.49    9.40
  -9  -6  -5   83.19    6.70
   9  -6   5   74.69    8.00
   9  -6  -5   92.49    6.40
   9   6   5   87.39    7.20
   9  -6  -5   88.59    7.70
   9   6   5   84.49    8.80
  -9   6  -5   82.09   10.60
  -9  -6   5   84.99    8.70
  -9  -7  -5  103.09    7.90
   9   7  -5  104.49   10.80
  -9   7   5  100.19   10.90
   9  -7   5   93.89    9.20
   9  -7  -5  111.29    8.80
  -9   7  -5  100.19   12.00
  -9  -7   5  111.29   10.50
   9   7   5  113.79   10.70
  -9   0  -6  360.06   14.20
  -9   0   6  363.06   13.30
   9   0  -6  335.17   15.40
  -9   0   6  368.46   16.00
  -9   0  -6  352.46   14.80
  -9   0  -6  363.76   13.40
   9   0   6  358.36   15.70
   9  -1   6   80.79    6.40
   9   1  -6   80.49    6.30
  -9   1   6   73.29    6.60
  -9  -1  -6   72.39    4.80
  -9  -1  -6   74.59    4.90
  -9   1   6   65.79    3.30
   9   1   6   84.59    6.30
  -9  -1   6   88.69    6.10
  -9  -1   6   86.49    5.10
   9  -1  -6   79.29    5.80
  -9   1  -6   87.29    4.40
  -9   1  -6   81.09    6.00
  -9   1  -6   87.69    4.10
   9   2  -6  516.85   19.90
  -9   2   6  488.95   20.40
  -9  -2  -6  462.15   17.00
   9  -2   6  466.85   19.50
  -9  -2  -6  474.85   18.00
  -9  -2   6  415.46   17.80
  -9  -2   6  420.76   17.80
  -9   2  -6  419.16   15.90
  -9   2  -6  413.56   19.10
   9   2   6  402.86   18.50
   9  -2  -6  420.76   17.90
   9  -3   6  129.29    8.90
   9   3  -6  133.59    9.10
  -9  -3  -6  119.59    6.50
   9  -3   6  130.99    5.10
  -9   3   6  131.89    9.40
  -9   3  -6  120.99    9.20
  -9  -3   6  126.69    8.20
   9  -3  -6  117.09    7.60
   9   3   6  119.39    8.20
  -9  -3   6  119.69    6.90
   9   3   6  126.19    7.90
  -9   3  -6  123.79    5.70
   9  -4   6  335.37   16.60
  -9   4   6  350.56   17.90
   9   4  -6  319.07   16.80
  -9  -4  -6  338.37   13.80
  -9  -4   6  350.66   16.30
  -9   4  -6  331.77   17.80
   9   4   6  323.17   15.70
   9  -4  -6  351.36   12.40
   9  -4  -6  351.36   12.90
  -9   4  -6  335.57   13.20
   9  -4  -6  320.87   14.90
  -9  -4   6  347.67   13.80
   9   4   6  354.76   16.30
  -9  -5  -6  130.59    7.50
   9  -5   6  120.49    9.60
  -9   5   6  136.19   11.30
   9   5  -6  140.19   10.70
   9   5   6  134.39    9.30
  -9   5  -6  145.49    7.80
   9  -5  -6  144.79    8.10
  -9   5  -6  134.29   11.50
   9   5   6  142.09   10.10
   9  -5  -6  130.39    8.80
  -9  -5   6  141.09   10.10
  -9   6   6  115.39   11.20
   9  -6   6  105.99    9.30
   9   6  -6  110.69   10.30
  -9  -6  -6  119.59    7.30
   9   6   6  109.09    8.50
  -9  -6   6   90.09    9.40
   9   6   6  109.29    9.80
   9  -6  -6  100.39    8.50
  -9   6  -6  100.89   10.50
   9  -7   6    9.10    4.60
   9   7  -6   11.70    5.50
  -9   7   6   20.10    6.20
  -9  -7  -6   11.70    3.70
   9  -7  -6   10.60    4.40
   9   7   6   12.60    5.10
  -9  -7   6   25.20    6.30
  -9   7  -6   24.90    7.10
   9   0  -7  452.15   20.00
  -9   0  -7  496.15   17.80
   9   0   7  479.75   20.50
  -9   0  -7  466.65   19.30
  -9   0   7  489.85   20.70
  -9   0   7  491.15   18.40
  -9   0   7  490.35   17.40
  -9   1   7  251.47    9.50
  -9  -1  -7  272.47   11.30
  -9   1   7  264.47   13.90
  -9   1   7  262.97    9.90
   9  -1   7  258.97   13.30
   9   1  -7  266.27   13.40
  -9  -1  -7  252.07   11.60
  -9   1  -7  285.27   10.80
   9  -1  -7  285.77   12.90
  -9  -1   7  278.87   11.40
   9   1   7  274.97   13.30
  -9   1  -7  271.07   11.00
  -9   1  -7  279.87   13.10
  -9  -1   7  272.87   13.00
  -9  -2  -7  597.74   22.50
   9   2  -7  612.04   24.70
   9  -2   7  557.94   24.10
   9  -2   7  584.34   20.70
  -9  -2  -7  585.24   21.90
  -9   2   7  602.14   25.40
   9  -2  -7  576.04   23.10
  -9   2  -7  572.64   24.40
  -9  -2   7  586.14   23.30
  -9  -2   7  567.94   22.70
  -9   2  -7  582.14   21.10
   9   2   7  579.54   24.10
   9   3  -7  167.88   10.80
   9  -3   7  163.28    6.80
  -9   3   7  164.78   11.30
   9  -3   7  147.59   10.30
  -9  -3  -7  165.18    8.10
  -9  -3  -7  157.98    9.70
  -9   3  -7  168.68    7.50
   9   3   7  189.08   10.80
  -9   3  -7  168.08   11.20
   9  -3  -7  162.28    9.40
  -9  -3   7  170.98    9.80
  -9  -3   7  180.88    9.20
  -9  -4  -7  171.18   10.70
   9   4  -7  170.28   11.70
  -9  -4  -7  168.18    8.30
   9  -4   7  161.08   10.50
  -9   4   7  175.88   12.40
  -9  -4   7  168.48    8.70
   9   4   7  159.88   10.30
  -9   4  -7  173.98   12.30
  -9   4  -7  167.18    7.90
  -9  -4   7  167.88   10.60
   9  -4  -7  161.78    9.70
   9  -5   7  152.88   10.70
  -9  -5  -7  129.69    7.30
   9   5  -7  127.39   10.70
  -9   5   7  137.59   11.70
  -9  -5   7  125.09   10.00
  -9   5  -7  145.39   12.10
   9  -5  -7  120.99    9.10
   9   5   7  127.69    9.70
  -9   6   7   26.60    6.80
   9  -6   7   32.80    6.20
   9   6  -7   41.90    7.30
  -9  -6  -7   38.60    4.40
   9  -6  -7   41.20    5.90
   9   6   7   48.30    6.70
  -9  -6   7   38.90    6.60
  -9   6  -7   25.40    6.60
  -9   7   7   38.10    8.20
   9  -7   7   33.60    6.40
  -9  -7  -7   32.30    4.60
   9   7  -7   28.90    7.10
   9  -7  -7   31.40    5.80
  -9   7  -7   31.10    8.10
  -9  -7   7   31.50    7.00
  -9   0   8    3.40    1.40
  -9   0  -8    0.60    2.10
   9   0  -8    1.40    2.30
  -9   0   8    2.00    2.80
  -9   0  -8    3.80    1.70
   9   0   8    0.30    2.70
  -9   0   8   -0.60    1.50
  -9  -1  -8  109.69    6.30
  -9  -1  -8  113.39    6.80
   9   1  -8  104.59    8.20
  -9   1   8  120.99    9.10
   9  -1   8  107.79    7.90
  -9  -1   8  100.29    6.10
   9  -1  -8  105.59    7.70
  -9  -1   8  108.39    7.90
  -9   1  -8  109.59    5.80
   9   1   8   98.99    8.10
  -9   1  -8   95.99    7.70
  -9  -2  -8  126.29    6.90
  -9   2   8  119.99    9.50
   9  -2   8  130.29    9.10
   9  -2   8  114.09    5.80
   9   2  -8  121.29    9.00
  -9  -2  -8  126.79    7.40
   9   2   8  109.29    8.60
  -9  -2   8  110.99    7.30
  -9   2  -8  124.99    9.10
   9  -2  -8  102.89    7.70
  -9   2  -8  119.89    6.20
  -9  -2   8  109.09    7.90
  -9  -3  -8  739.83   28.40
  -9  -3  -8  692.33   26.70
  -9   3   8  735.23   31.50
   9   3  -8  750.92   30.70
   9  -3   8  700.53   29.70
   9   3   8  744.43   30.00
   9  -3  -8  725.63   28.50
  -9   3  -8  732.23   26.50
  -9  -3   8  726.93   28.80
  -9   3  -8  733.33   31.00
  -9  -3   8  735.83   28.50
  -9   4   8  217.68   14.40
   9  -4   8  235.38   13.60
  -9  -4  -8  243.28   13.10
   9   4  -8  258.57   14.70
  -9  -4  -8  242.48   10.60
  -9  -4   8  226.98   11.50
  -9   4  -8  245.08   15.10
  -9  -4   8  213.08   12.90
   9  -4  -8  219.88   12.10
   9   4   8  197.18   12.80
   9   5  -8   80.99    9.70
  -9   5   8   88.59    9.70
   9  -5   8   91.09    8.70
  -9  -5  -8   84.39    6.10
  -9  -5  -8   92.39    9.20
  -9   5  -8   84.69   10.70
   9   5   8   88.49    8.50
   9  -5  -8   97.79    8.10
  -9  -5   8   94.59    8.90
   9  -6   8   30.10    5.90
  -9  -6  -8   22.90    6.20
  -9   6   8   20.50    6.20
  -9  -6  -8   25.90    3.90
   9   6  -8   24.30    6.30
  -9   6  -8   14.00    6.50
   9   6   8   23.60    5.60
   9  -6  -8   22.70    5.00
  -9  -6   8   24.90    6.10
   9   0   9   65.59    7.00
  -9   0   9   62.39    3.80
   9   0  -9   54.29    6.30
  -9   0   9   60.79    7.20
  -9   0  -9   58.49    5.80
  -9   0  -9   66.09    4.70
  -9  -1  -9  230.68   11.20
  -9  -1  -9  242.18   10.40
  -9   1   9  246.58   14.10
   9   1  -9  208.08   12.70
   9  -1   9  228.98   13.00
  -9  -1   9  202.98   10.00
  -9   1  -9  228.28   10.10
  -9  -1   9  208.58   12.60
  -9   1  -9  214.48   12.10
   9  -1  -9  221.78   12.20
   9   1   9  211.38   12.70
   9   2  -9   22.10    5.00
  -9  -2  -9   21.40    3.40
  -9   2   9   19.20    5.30
  -9  -2  -9   21.70    3.80
   9  -2   9   23.30    5.00
  -9   2  -9   25.80    5.20
   9  -2  -9   32.20    5.20
  -9   2  -9   28.10    3.40
  -9  -2   9   30.00    4.20
   9   2   9   25.40    4.90
  -9  -2   9   25.10    4.60
   9  -3   9  216.48   13.00
   9   3  -9  214.08   13.30
  -9  -3  -9  207.08    9.90
  -9  -3  -9  212.18   11.30
  -9   3   9  194.48   13.50
  -9  -3   9  179.18   11.00
  -9   3  -9  198.88   13.20
   9  -3  -9  207.38   11.60
  -9  -3   9  186.28   11.10
   9   3   9  199.48   12.70
   9  -4   9   56.79    7.40
  -9   4   9   61.89    9.20
  -9  -4  -9   63.99    7.00
   9   4  -9   75.89    9.00
  -9  -4  -9   60.39    5.20
  -9  -4   9   50.59    6.60
   9  -4  -9   46.80    6.00
  -9   4  -9   50.99    7.90
   9   4   9   60.29    7.80
  -9  -4   9   57.69    6.20
  -9   5   9   46.00    8.40
   9   5  -9   53.09    8.70
  -9  -5  -9   60.79    7.30
   9  -5   9   59.49    7.80
  -9  -5  -9   47.90    4.90
   9   5   9   49.10    7.40
   9  -5  -9   44.80    6.20
  -9   5  -9   59.39    8.90
  -9  -5   9   44.40    6.90
   9   6  -9   16.90    5.70
  -9   6   9   10.90    6.20
  -9  -6  -9   12.70    5.50
   9  -6   9   10.60    4.70
   9   6   9    7.30    4.90
  -9  -6   9   10.10    5.00
  -9   6  -9   12.80    6.20
   9  -6  -9    5.80    4.40
  -9   0 -10  150.98    7.90
  -9   0 -10  149.59    9.60
  -9   0  10  136.49   10.80
   9   0 -10  141.89   10.20
   9   0  10  141.49   10.40
   9   1 -10   11.70    4.10
  -9  -1 -10   11.70    3.00
  -9  -1 -10   11.00    3.30
  -9   1  10    7.50    4.60
   9  -1  10   14.80    4.50
  -9   1 -10   10.50    4.10
  -9  -1  10    5.30    4.00
  -9   1 -10   10.40    2.80
  -9  -1  10    7.30    2.60
   9  -1 -10    6.40    3.70
   9   1  10    8.80    4.40
  -9  -2 -10  149.88    8.40
   9   2 -10  114.69   10.00
   9  -2  10  138.59   10.20
  -9   2  10  151.38   11.90
  -9  -2 -10  137.69    8.50
  -9  -2  10  136.89    8.50
  -9   2 -10  128.49    7.60
   9   2  10  127.79   10.40
   9  -2 -10  131.89    9.50
  -9   2 -10  122.69   10.10
  -9  -2  10  127.89    9.60
  -9  -3 -10  121.99    8.50
  -9  -3 -10  124.09    7.60
   9   3 -10  114.69   10.70
   9  -3  10  116.79   10.10
  -9   3  10  108.29   11.10
   9   3  10  123.39   10.30
  -9   3 -10  112.99   10.50
  -9  -3  10  121.89    9.10
  -9  -3  10  112.59    8.70
   9  -3 -10  109.39    9.00
  -9  -4 -10   38.50    5.30
   9   4 -10   41.80    7.50
  -9   4  10   49.70    8.70
  -9  -4 -10   50.79    6.30
   9  -4  10   44.50    6.80
   9  -4 -10   47.40    6.30
  -9  -4  10   58.59    6.70
  -9   4 -10   49.00    8.30
   9   4  10   46.60    7.40
  -9  -4  10   55.79    7.00
  -9  -5 -10   26.30    5.60
  -9   5  10   34.00    7.50
   9   5 -10   20.90    6.40
   9  -5  10   21.00    5.60
  -9   5 -10   24.50    6.80
   9   5  10   23.50    6.20
  -9  -5  10   34.10    6.20
   9  -5 -10   10.50    4.60
   9   0  11  370.66   19.50
  -9   0 -11  377.46   17.90
  -9   0 -11  371.46   15.90
  -9   0  11  369.46   19.70
   9   0 -11  387.66   19.00
  -9   1  11   20.20    6.10
   9   1 -11   16.60    4.60
  -9  -1 -11   10.40    3.10
   9  -1  11   11.20    4.90
  -9  -1 -11   14.90    3.90
   9   1  11   16.50    4.80
   9  -1 -11   11.80    4.30
  -9   1 -11   17.50    3.50
  -9  -1  11   18.50    5.00
  -9   1 -11   11.20    4.40
  -9   2  11  110.39   11.20
   9   2 -11   93.19    9.50
   9  -2  11  102.49    9.50
  -9  -2 -11  114.09    8.10
  -9  -2 -11  112.89    8.00
   9  -2 -11  119.39    9.50
  -9  -2  11  125.99   10.10
  -9   2 -11  108.89   10.30
   9   2  11  120.09   10.80
  -9  -2  11  118.89    8.00
  -9   3  11   38.50    7.80
   9  -3  11   30.40    6.00
   9   3 -11   24.70    6.20
  -9  -3 -11   23.90    4.90
   9  -3 -11   25.80    5.40
   9   3  11   27.50    6.20
  -9  -3  11   29.10    4.90
  -9   3 -11   23.20    6.30
  -9  -3  11   27.80    5.40
  -9   4  11   40.70    8.20
   9   4 -11   54.29    8.80
   9  -4  11   49.99    8.00
  -9  -4 -11   51.99    6.50
  -9   4 -11   43.50    8.40
  -9  -4  11   41.70    6.40
   9   4  11   45.70    7.70
   9  -4 -11   44.20    6.40
  -9  -4  11   37.70    6.00
   9   0 -12   53.49    7.20
  -9   0 -12   54.09    5.70
  -9   0 -12   45.80    6.50
  -9   0  12   59.69    8.60
   9   0  12   55.39    8.30
   9   1 -12  145.59   11.40
   9  -1  12  135.29   11.80
  -9   1  12  131.09   12.30
  -9  -1 -12  158.08   10.20
  -9  -1 -12  141.49    8.80
   9   1  12  145.79   11.50
  -9  -1  12  144.79   11.70
  -9   1 -12  144.09   11.20
   9  -1 -12  153.58   11.20
   9  -2  12   21.30    6.10
  -9   2  12   19.90    6.80
   9   2 -12   20.80    5.50
  -9  -2 -12   15.30    4.20
   9   2  12   20.10    5.90
  -9   2 -12    5.00    5.00
  -9  -2  12   21.40    5.70
   9  -2 -12    7.10    4.30
  -9  -3 -12  112.69    8.80
   9   3 -12   59.19    9.00
  -9   3  12  104.29   12.50
   9  -3  12  112.99   10.70
   9   3  12  104.39   10.80
  -9  -3  12  100.29    8.30
  -9  -3  12   94.09    9.30
  -9   3 -12   79.69   10.20
   9  -3 -12   86.39    9.00
   9   0  13   22.10    6.20
   9   0 -13   12.70    4.90
  -9   0  13   22.30    6.40
  -9   0 -13   10.50    4.70
   9  -1  13   97.89   10.60
  -9   1  13  106.09   12.00
  -9  -1 -13   95.39    7.60
   9   1 -13  106.89   10.10
   9  -1 -13   91.79    9.30
  -9  -1  13   89.89   10.70
  -9   1 -13   94.19    9.80
   9   1  13   79.19   10.00
  -9   2  13   28.20    7.10
  -9  -2 -13   21.40    4.60
   9  -2  13   22.20    6.30
   9   2 -13   30.50    6.60
  -9  -2  13   35.50    6.90
   9  -2 -13   15.10    5.30
  -9   2 -13   28.00    6.80
   9   2  13   22.20    6.50
  10   0   0  509.15   19.00
  10   0   0  507.85   19.90
 -10   0   0  509.85   18.70
  10   0   0  533.55   20.00
 -10   0   0  533.85   18.80
 -10   1   0    1.40    1.30
 -10   1   0    3.20    1.00
 -10  -1   0    2.50    1.50
 -10  -1   0    1.00    1.20
  10   1   0    2.10    1.50
  10  -1   0    1.90    1.10
  10  -1   0   -1.60    2.00
  10   1   0    0.60    1.60
  10   1   0    1.50    1.40
 -10  -2   0 2832.32   97.19
 -10   2   0 2828.72   96.29
  10   2   0 2865.41   96.29
  10   2   0 2880.61   98.59
  10  -2   0 2898.11   99.39
  10  -2   0 2902.21   96.29
  10   2   0 2912.01   96.49
 -10   2   0 2837.62   97.89
  10  -3   0  479.05   18.40
  10   3   0  490.55   20.60
 -10  -3   0  477.85   19.00
  10  -3   0  507.65   17.90
 -10   3   0  483.05   20.00
  10  -3   0  519.55   21.40
  10  -4   0   87.69    4.90
  10   4   0   85.19    7.30
  10  -4   0   76.79    7.50
 -10   4   0   82.49    6.80
 -10  -4   0   89.39    6.20
  10  -5   0   44.40    4.20
  10   5   0   55.69    6.80
 -10   5   0   39.60    5.60
  10  -5   0   40.00    6.20
 -10  -5   0   40.30    5.40
 -10   6   0  156.28   11.10
  10   6   0  157.68   11.50
  10  -6   0  157.88   11.70
 -10  -6   0  147.99   10.00
  10  -6   0  143.69    8.30
 -10   7   0   62.19    8.40
 -10  -7   0   63.29    7.50
  10  -7   0   79.69    9.50
  10   7   0   71.79    8.90
  10  -7   0   60.39    6.20
  10  -8   0   33.20    5.20
 -10  -8   0   26.80    5.80
  10  -8   0   38.00    7.70
  10   8   0   26.10    6.90
 -10   0   1  352.26   14.60
  10   0  -1  355.66   13.90
  10   0   1  366.56   13.70
 -10   0  -1  360.96   13.40
 -10   0   1  366.66   13.70
  10   0   1  352.16   14.60
  10   0  -1  368.66   14.10
 -10   0   1  356.96   13.30
 -10   0  -1  354.66   15.00
 -10   0  -1  371.16   13.70
  10   0  -1  367.46   14.50
  10   1  -1 2135.39   73.69
 -10  -1  -1 2219.78   74.09
 -10   1   1 2159.08   73.19
 -10   1   1 2215.88   73.49
 -10  -1  -1 2190.78   74.09
 -10  -1  -1 2126.39   73.29
  10  -1   1 2139.99   72.69
 -10   1   1 2133.89   75.19
  10   1  -1 2226.08   73.89
  10   1  -1 2106.89   74.39
  10  -1   1 2138.59   75.19
 -10  -1   1 2146.59   73.39
 -10   1  -1 2243.78   73.99
  10   1   1 2147.19   74.19
  10  -1  -1 2279.27   73.09
 -10   1  -1 1933.31   72.39
  10  -1  -1 2237.88   73.49
  10   1   1 2202.58   73.89
  10  -2   1  368.76   15.80
  10  -2   1  359.86   12.50
 -10   2   1  361.56   13.30
  10   2  -1  339.07   15.00
 -10  -2  -1  369.96   13.60
  10   2  -1  370.46   12.90
  10  -2   1  358.86   12.70
  10   2  -1  361.36   12.80
 -10  -2  -1  349.27   13.60
 -10   2   1  356.76   14.10
 -10   2  -1  333.87   14.50
  10   2   1  338.67   13.10
 -10  -2   1  328.07   13.80
  10  -2  -1  336.87   13.20
  10   2   1  333.37   14.80
 -10  -3  -1  377.16   13.00
  10  -3   1  337.77   12.60
  10   3  -1  334.97   15.70
 -10   3   1  339.87   14.80
  10  -3   1  338.27   15.90
 -10  -3  -1  346.77   14.10
  10  -3   1  339.57   13.20
 -10   3   1  330.47   15.90
 -10   3  -1  352.36   15.50
 -10  -3   1  351.66   14.50
  10   3   1  340.97   15.50
  10  -3  -1  350.56   13.30
  10   3   1  348.27   12.80
  10  -4   1  403.86   18.90
 -10   4   1  398.06   19.00
 -10  -4  -1  400.36   17.00
  10  -4   1  409.16   15.60
  10   4  -1  423.56   19.10
 -10   4   1  430.66   18.20
  10  -4   1  435.26   18.50
 -10  -4  -1  411.06   15.00
  10   4   1  421.76   15.00
  10  -4  -1  430.16   16.20
 -10   4  -1  427.06   18.90
 -10  -4   1  421.26   17.50
  10   4   1  440.46   19.20
 -10  -5  -1   12.70    3.20
 -10   5   1   24.60    4.40
  10  -5   1   16.00    2.60
  10  -5   1   11.80    3.90
 -10   5   1   22.70    5.00
  10   5  -1   16.90    4.30
  10  -5  -1   12.90    2.80
 -10  -5   1    9.80    3.30
  10   5   1   12.10    4.00
 -10   5  -1   13.10    4.20
  10  -6   1  277.77   12.30
  10   6  -1  258.37   15.90
 -10  -6  -1  245.08   13.40
 -10   6   1  256.17   14.60
  10  -6   1  267.77   15.70
  10  -6  -1  284.37   12.70
  10   6   1  285.67   16.00
 -10  -6   1  272.37   14.30
  10  -6  -1  296.17   16.50
 -10   6  -1  267.07   15.40
  10  -7   1  122.09    8.00
  10  -7   1  134.29   11.10
  10   7  -1  117.49   11.10
 -10   7   1  118.59   10.40
 -10  -7  -1  118.09    9.40
  10   7   1  128.59   11.60
 -10   7  -1  116.49   10.90
 -10  -7   1  128.49   10.00
  10  -7  -1  129.89   11.50
  10  -7  -1  116.49    8.30
  10   8  -1   28.00    7.20
 -10  -8  -1   19.90    5.20
  10  -8   1   18.20    6.30
  10  -8   1   24.20    4.40
 -10  -8   1   16.90    5.40
  10   8   1   27.70    7.30
  10  -8  -1   16.40    6.30
  10  -8  -1   22.00    4.60
  10  -8  -1   23.00    5.50
  10   0  -2    3.80    1.30
  10   0  -2    4.10    1.60
 -10   0  -2    2.90    1.20
 -10   0  -2    2.90    1.40
  10   0   2    0.00    1.20
  10   0  -2    4.20    1.80
 -10   0   2    3.10    1.20
 -10   0   2    1.00    1.80
  10   0   2    2.20    1.80
 -10  -1  -2 1244.58   44.30
 -10  -1  -2 1229.28   44.50
  10   1  -2 1172.78   44.60
  10  -1   2 1192.28   45.20
 -10   1   2 1202.78   45.30
  10   1  -2 1225.68   43.90
 -10  -1  -2 1215.28   43.60
 -10   1   2 1327.87   43.50
 -10   1  -2 1325.47   44.60
 -10  -1   2 1321.57   44.30
  10  -1  -2 1332.97   44.10
  10   1   2 1321.17   44.30
 -10  -1   2 1296.17   43.80
  10  -1  -2 1308.87   43.20
  10   1   2 1263.97   44.30
  10  -2   2  366.16   16.50
 -10  -2  -2  377.26   15.00
 -10   2   2  353.36   14.80
  10   2  -2  392.46   14.00
  10   2  -2  390.96   16.30
 -10   2   2  383.56   16.80
 -10  -2  -2  383.46   14.70
 -10   2  -2  383.56   16.10
  10  -2  -2  405.26   14.20
  10   2   2  396.46   16.10
 -10  -2   2  385.46   14.20
  10  -2  -2  377.86   14.70
  10   2   2  403.36   14.80
 -10  -2   2  397.06   15.30
 -10   3   2  665.03   24.90
  10  -3   2  676.93   26.80
 -10   3   2  696.03   27.00
  10  -3   2  647.84   22.70
  10   3  -2  630.74   26.20
 -10  -3  -2  688.33   24.00
 -10  -3  -2  666.13   24.40
  10  -3   2  658.63   23.20
 -10   3  -2  656.03   26.20
  10   3   2  644.44   23.80
  10   3   2  642.24   25.90
  10  -3  -2  658.33   24.00
 -10  -3   2  659.83   25.10
  10   4  -2  104.19    8.10
 -10   4   2   97.19    6.70
  10  -4   2   95.89    4.80
 -10  -4  -2   99.49    5.10
  10  -4   2   96.99    5.40
  10  -4   2  101.89    8.00
 -10  -4  -2  100.09    6.30
 -10   4   2  106.39    8.40
  10  -4  -2   95.29    5.70
 -10   4  -2   86.29    7.70
  10   4   2   88.49    5.00
  10   4   2   89.99    7.50
 -10  -4   2   94.29    6.90
 -10   5   2  311.67   14.80
 -10  -5  -2  325.07   12.30
  10  -5   2  310.67   12.70
 -10   5   2  298.27   16.40
  10   5  -2  312.67   16.40
  10  -5   2  332.77   16.40
 -10  -5  -2  312.17   14.00
  10   5   2  306.97   12.40
  10  -5  -2  315.67   13.50
  10   5   2  305.97   16.10
 -10   5  -2  285.47   16.10
 -10  -5   2  305.57   15.00
 -10   6   2   -1.00    3.50
  10   6  -2    2.90    3.90
 -10   6   2    0.90    3.00
  10  -6   2    5.60    2.30
  10  -6   2    0.90    3.70
 -10  -6  -2    5.30    3.30
  10  -6  -2    2.80    2.70
  10   6   2    1.20    3.90
 -10   6  -2    1.80    3.70
 -10  -6   2   -0.60    3.40
  10   7  -2  120.69   11.50
  10  -7   2  130.59   11.20
 -10  -7  -2  131.09    9.40
  10  -7   2  131.89    8.20
 -10   7  -2  144.39   12.10
  10  -7  -2  135.69    9.00
 -10  -7   2  121.49   10.20
  10   7   2  140.59   11.80
 -10  -8  -2   75.19    7.90
  10   8  -2   59.09    9.10
  10  -8   2   54.99    8.40
 -10   8  -2   71.19   10.30
  10  -8  -2   46.80    8.40
 -10  -8   2   65.29    8.10
  10   8   2   66.19    9.50
  10  -8  -2   68.69    7.20
  10  -8  -2   64.79    7.60
 -10   0   3 2507.65   86.79
 -10   0  -3 2568.74   85.19
 -10   0  -3 2389.46   85.69
  10   0   3 2578.94   86.89
  10   0  -3 2562.74   86.39
 -10   0   3 2587.84   84.99
  10   0  -3 2533.55   85.39
  10   0   3 2480.25   84.99
 -10   1   3  324.97   14.20
  10   1  -3  337.67   13.80
  10   1  -3  336.97   12.90
 -10   1   3  349.07   12.10
 -10  -1  -3  331.87   12.50
 -10  -1  -3  333.67   13.20
  10  -1   3  331.97   14.20
  10   1   3  292.67   12.80
 -10  -1   3  312.57   12.50
  10  -1  -3  308.47   11.80
 -10   1  -3  321.77   13.40
  10  -1  -3  310.67   13.00
 -10  -1   3  298.07   12.90
  10   1   3  307.57   13.10
 -10   2   3  371.06   15.90
  10   2  -3  366.96   12.90
 -10  -2  -3  349.17   13.20
 -10   2   3  375.16   13.40
  10   2  -3  342.27   15.00
  10  -2   3  333.27   15.10
 -10  -2   3  319.87   13.00
 -10  -2   3  327.47   13.80
  10  -2  -3  325.27   13.50
 -10   2  -3  346.77   15.00
  10   2   3  310.17   14.30
  10  -2  -3  331.07   12.40
  10   2   3  329.37   13.70
 -10   3   3  770.72   31.50
  10   3  -3  796.52   31.30
  10  -3   3  768.02   31.20
 -10   3   3  795.72   29.30
 -10  -3  -3  791.22   28.90
  10   3  -3  772.12   27.30
 -10  -3   3  858.21   27.60
 -10   3  -3  827.02   31.50
 -10  -3   3  814.02   30.10
  10   3   3  808.02   30.80
  10   3   3  794.62   29.30
  10  -3  -3  825.52   29.20
  10  -3  -3  829.82   28.30
  10  -4   3   60.69    3.60
 -10  -4  -3   64.39    5.00
  10   4  -3   70.09    6.90
  10  -4   3   67.39    4.00
 -10   4   3   58.39    5.20
 -10   4   3   70.49    7.20
  10  -4   3   63.79    6.60
 -10  -4   3   67.49    6.10
  10   4   3   73.99    4.90
  10   4   3   66.59    6.70
  10  -4  -3   76.79    5.20
 -10   4  -3   73.09    7.30
 -10  -5  -3  209.38   10.60
  10  -5   3  192.98   12.00
 -10   5   3  213.38   11.20
  10   5  -3  194.48   12.80
 -10   5   3  210.08   13.30
  10   5   3  239.88   13.10
  10   5   3  212.58    9.90
  10  -5  -3  231.18   10.70
 -10  -5   3  221.78   12.10
 -10   5  -3  211.78   13.50
  10   6  -3   47.60    7.30
 -10   6   3   64.79    8.50
  10  -6   3   35.60    6.20
 -10   6   3   44.50    6.10
 -10  -6  -3   41.70    5.40
  10  -6  -3   49.60    5.50
 -10   6  -3   48.50    7.50
 -10  -6   3   46.30    6.70
  10   6   3   47.40    7.10
  10   7  -3   34.10    6.90
 -10   7   3   40.80    7.30
 -10  -7  -3   44.60    5.90
  10  -7   3   31.20    6.30
  10  -7  -3   59.39    6.50
 -10  -7   3   46.90    6.70
  10  -7  -3   42.10    5.50
 -10   7  -3   45.00    7.80
  10   7   3   40.80    7.30
  10   8  -3    3.00    5.20
 -10  -8  -3   13.00    4.60
  10  -8   3    3.20    4.20
 -10   8  -3   -0.30    4.50
  10  -8  -3    9.80    4.10
  10   8   3    4.60    5.20
 -10  -8   3    2.60    4.70
  10  -8  -3   10.60    4.10
  10   0  -4 1690.43   58.19
 -10   0   4 1692.73   56.29
 -10   0  -4 1657.83   56.69
  10   0   4 1669.53   58.39
 -10   0  -4 1610.84   57.39
  10   0  -4 1680.33   56.89
 -10   0   4 1616.14   58.39
 -10  -1  -4  111.09    7.20
 -10   1   4  111.99    7.50
 -10   1   4  120.99    5.20
  10   1  -4  125.79    7.20
  10  -1   4  112.79    7.30
 -10  -1  -4  117.99    6.00
  10  -1  -4  111.89    5.20
  10   1   4  126.19    6.90
 -10   1  -4  113.89    6.80
 -10  -1   4  119.09    6.60
 -10  -1   4  120.19    6.00
  10   1   4  131.19    6.40
  10  -1  -4  115.79    6.60
 -10   2   4 1865.31   59.29
 -10  -2  -4 1772.42   59.59
  10   2  -4 1733.23   61.59
  10  -2   4 1743.93   61.99
 -10   2   4 1702.73   62.19
  10   2  -4 1826.32   59.59
  10  -2  -4 1722.93   58.39
 -10  -2   4 1687.33   60.29
 -10   2  -4 1688.83   61.49
  10  -2  -4 1700.63   60.19
 -10  -2   4 1700.63   59.69
  10   2   4 1726.53   60.59
  10   2   4 1684.43   60.69
 -10  -3  -4   48.70    3.90
 -10   3   4   51.19    6.30
  10   3  -4   43.90    5.20
  10   3  -4   52.29    2.90
  10  -3   4   36.40    4.80
 -10   3   4   44.00    3.70
  10  -3  -4   45.00    4.20
  10   3   4   47.80    4.40
 -10  -3   4   37.50    4.40
 -10  -3   4   43.90    3.10
 -10   3  -4   42.30    5.50
  10   3   4   40.00    4.70
  10  -3  -4   38.40    2.80
 -10   4   4  272.67   14.70
 -10   4   4  284.77   11.90
  10  -4   4  278.87   10.40
  10   4  -4  261.97   14.20
  10  -4   4  260.57   13.70
 -10  -4  -4  273.87   11.70
  10   4   4  264.57   12.20
  10  -4  -4  274.87   12.20
 -10   4  -4  262.77   14.80
  10   4   4  269.97   13.80
 -10   4  -4  268.17   10.30
 -10  -4   4  260.97   13.00
  10  -5   4   13.10    4.10
  10   5  -4   12.50    4.50
 -10   5   4    9.50    3.10
 -10  -5  -4   12.00    3.00
 -10   5   4   15.10    5.00
  10   5   4   11.90    4.00
 -10   5  -4   10.80    5.00
  10   5   4   13.10    3.00
 -10   5  -4   15.10    2.40
 -10  -5   4    5.20    3.70
  10  -5  -4   12.70    3.20
  10   6  -4  154.98   11.80
  10  -6   4  158.78   10.70
 -10  -6  -4  146.29    8.60
 -10   6   4  166.68   12.40
 -10   6  -4  113.69   11.30
 -10   6  -4  127.49    7.80
 -10  -6   4  114.79   10.00
  10   6   4  125.59   10.50
  10  -6  -4  121.19    8.20
  10  -6  -4  131.49    8.80
  10   6   4  117.29    8.30
 -10  -7  -4   15.30    4.00
  10  -7   4    8.00    4.70
  10   7  -4   13.70    5.50
 -10   7   4   18.80    6.10
 -10  -7   4   11.20    4.70
 -10   7  -4    6.50    5.30
  10   7   4   17.60    5.60
  10  -7  -4   12.70    4.00
  10  -7  -4   15.70    3.90
  10   0  -5  795.12   27.70
  10   0   5  767.42   29.40
 -10   0   5  746.03   29.30
  10   0  -5  790.02   29.30
 -10   0  -5  761.32   27.60
 -10   0  -5  769.52   26.90
 -10   0  -5  766.52   28.30
 -10   0   5  787.92   27.00
  10  -1   5  653.73   25.70
 -10  -1  -5  643.44   23.90
 -10   1   5  654.53   22.70
  10   1  -5  661.43   25.60
 -10   1   5  669.03   26.20
  10  -1  -5  666.13   23.00
 -10  -1   5  667.53   25.00
 -10  -1   5  652.73   23.80
 -10   1  -5  647.34   25.10
 -10   1  -5  627.84   22.60
  10  -1  -5  626.54   24.80
  10   1   5  667.83   25.20
  10   2  -5  541.75   22.40
  10  -2   5  520.45   22.30
 -10   2   5  543.85   19.30
 -10   2   5  528.95   23.00
 -10  -2  -5  535.75   20.10
  10  -2  -5  558.04   18.90
  10  -2  -5  550.44   21.10
  10   2   5  542.75   21.30
 -10  -2   5  544.95   21.00
  10   2   5  562.64   21.80
 -10   2  -5  554.24   22.50
 -10  -2   5  532.65   20.70
 -10   3   5   19.80    2.30
  10   3  -5   22.30    4.20
  10   3  -5   20.50    2.40
 -10  -3  -5   14.50    2.50
 -10   3   5   19.60    4.40
  10  -3   5   14.20    3.70
  10   3   5   18.00    3.50
 -10  -3   5   26.60    2.90
  10  -3  -5   26.40    3.60
 -10  -3   5   18.80    3.40
  10   3   5   20.10    3.40
 -10   3  -5   26.40    4.90
  10  -3  -5   23.20    1.80
 -10   4   5  243.08   10.60
 -10  -4  -5  252.27   10.90
  10   4  -5  221.88   13.40
  10  -4   5  253.07   13.60
 -10   4   5  239.58   14.00
  10  -4   5  246.48    9.40
 -10   4  -5  246.98    9.60
  10  -4  -5  263.47   11.90
  10   4   5  269.87   13.40
  10  -4  -5  253.47    9.60
 -10  -4   5  248.18    9.90
 -10   4  -5  242.08   14.30
 -10  -4   5  256.77   12.90
  10   4   5  246.98   12.10
 -10  -5  -5   13.50    3.00
  10   5  -5   21.20    5.20
  10  -5   5   12.70    4.30
 -10   5   5   22.80    5.70
  10   5   5   14.20    3.40
 -10   5  -5   13.00    4.70
  10  -5  -5   20.10    3.90
 -10  -5   5   11.30    4.20
  10   5   5   16.00    4.50
  10  -5  -5   20.70    3.10
 -10   5  -5   15.50    2.50
 -10   6   5  244.38   15.80
 -10  -6  -5  255.97   12.00
  10   6  -5  221.08   14.90
  10  -6   5  248.08   14.50
 -10   6  -5  215.88   15.60
 -10  -6   5  255.67   14.50
  10   6   5  241.98   14.70
  10  -6  -5  230.38   11.50
  10   6   5  240.88   12.50
  10  -6  -5  239.58   12.60
 -10  -7  -5   58.29    6.20
  10  -7   5   60.99    8.10
  10   7  -5   39.30    7.50
 -10   7   5   69.29    9.50
 -10  -7   5   48.50    7.80
 -10   7  -5   47.80    8.70
  10   7   5   57.09    8.30
  10  -7  -5   58.39    6.60
  10   0  -6  401.46   17.50
  10   0   6  411.66   17.70
 -10   0   6  400.96   15.00
  10   0  -6  416.66   15.80
 -10   0  -6  412.36   16.70
 -10   0   6  409.26   17.80
 -10   0  -6  403.66   15.90
 -10   0  -6  417.56   15.00
 -10  -1  -6  707.63   25.90
 -10   1   6  723.43   28.30
 -10  -1  -6  728.63   25.50
  10  -1   6  707.03   27.70
 -10   1   6  624.74   24.10
  10   1  -6  746.13   27.90
 -10  -1   6  702.33   25.50
  10   1   6  724.33   27.50
 -10   1  -6  703.33   24.80
  10  -1  -6  671.53   26.80
 -10   1  -6  677.13   24.40
 -10   1  -6  696.83   27.10
 -10  -1   6  710.13   27.10
  10  -1  -6  710.73   24.60
 -10  -2  -6  208.98    9.90
  10   2  -6  212.98   11.50
 -10   2   6  229.08   12.30
 -10  -2  -6  205.28    9.10
  10  -2   6  199.68   11.20
 -10  -2   6  189.28    9.70
  10   2   6  194.28   10.60
  10  -2  -6  202.48   10.20
 -10   2  -6  182.98   11.00
 -10  -2   6  193.88    9.80
 -10  -3  -6  263.97   11.00
 -10   3   6  253.77   14.40
  10  -3   6  262.57   13.50
  10   3  -6  264.87   13.90
  10   3   6  253.07   12.60
 -10   3  -6  244.08   13.70
 -10  -3   6  258.37   11.40
  10   3   6  261.77   12.80
 -10  -3   6  246.28   12.40
  10  -3  -6  252.37   12.00
 -10  -4  -6   91.19    5.70
  10  -4   6   90.09    8.00
 -10   4   6   99.19    9.30
  10   4  -6   98.99    8.60
 -10   4  -6  101.29    9.30
 -10   4  -6   92.89    4.60
 -10  -4   6   89.99    5.50
  10  -4  -6   91.79    4.50
  10  -4  -6   80.79    6.90
  10   4   6   96.19    7.90
 -10  -4   6   89.99    7.60
  10   4   6   85.89    7.20
 -10   5   6  107.99    9.70
  10   5  -6   97.89    9.40
  10  -5   6   95.39    8.70
 -10  -5  -6  109.09    6.40
  10   5   6   91.79    8.50
 -10   5  -6   92.59   10.30
 -10  -5   6   95.49    8.60
  10  -5  -6   91.99    7.30
  10   5   6  103.29    7.90
  10   6  -6    5.20    4.50
 -10   6   6    9.90    5.40
  10  -6   6    4.00    4.00
 -10  -6  -6    7.40    3.00
  10  -6  -6   10.80    3.90
  10   6   6    5.00    3.50
 -10   6  -6    7.40    5.30
 -10  -6   6   12.50    4.70
  10   6   6    9.80    4.40
 -10   7   6   45.80    8.50
  10  -7   6   43.00    7.10
  10   7  -6   39.30    7.80
 -10  -7  -6   40.50    5.10
 -10  -7   6   41.10    7.30
 -10   7  -6   40.20    8.20
  10   7   6   44.80    7.30
  10  -7  -6   46.20    6.20
 -10   0  -7  136.59    6.20
 -10   0   7  130.69    8.80
 -10   0   7  131.39    5.90
 -10   0  -7  130.49    7.70
  10   0   7  119.99    8.20
  10   0  -7  127.39    8.40
 -10   0   7  137.59    7.00
  10  -1   7  344.37   16.10
 -10   1   7  341.37   16.60
 -10   1   7  342.97   12.80
 -10  -1  -7  350.96   13.80
 -10   1   7  329.37   12.10
 -10  -1  -7  345.17   14.40
  10   1  -7  351.66   16.20
 -10   1  -7  342.17   13.40
 -10  -1   7  355.86   15.80
 -10   1  -7  355.66   13.10
 -10  -1   7  348.97   13.90
  10  -1  -7  336.57   15.40
  10   1   7  338.77   15.90
 -10   1  -7  323.67   15.40
 -10   2   7  168.58   11.20
 -10  -2  -7  184.08    9.10
  10   2  -7  185.78   10.90
  10  -2   7  183.68   10.70
 -10  -2  -7  172.08    8.40
 -10   2  -7  172.98    7.20
 -10  -2   7  161.88    8.90
  10   2   7  159.88   10.00
  10  -2  -7  178.78    9.60
 -10  -2   7  156.48    9.30
 -10   2  -7  162.18   10.40
 -10   2  -7  165.08    7.10
 -10  -3  -7  454.35   18.20
  10  -3   7  486.55   17.10
  10   3  -7  481.95   21.80
 -10  -3  -7  460.85   19.80
 -10   3   7  475.35   22.40
  10  -3   7  476.15   21.30
  10   3   7  466.35   20.60
 -10  -3   7  473.85   19.20
 -10   3  -7  470.25   17.00
 -10   3  -7  480.15   21.90
 -10  -3   7  467.85   19.90
  10  -3  -7  457.95   19.50
 -10  -4  -7    6.70    2.60
  10   4  -7    3.40    3.60
  10  -4   7    8.10    4.00
 -10   4   7   10.90    4.80
 -10  -4   7    5.60    3.60
  10   4   7    5.90    3.20
 -10  -4   7    9.80    2.60
 -10   4  -7    0.60    3.50
  10  -4  -7    2.90    3.00
 -10  -5  -7  161.38    8.30
 -10   5   7  169.18   12.90
  10   5  -7  161.88   12.30
  10  -5   7  153.38   11.00
 -10   5  -7  139.99   12.00
  10  -5  -7  134.69    9.70
  10   5   7  140.89   10.30
 -10  -5   7  159.68   11.00
  10   6  -7    2.80    4.40
  10  -6   7   -2.20    3.80
 -10  -6  -7    6.00    2.90
 -10   6   7    1.70    4.80
 -10  -6   7   -0.90    3.90
 -10   6  -7   -1.00    4.30
  10   6   7   -2.60    3.10
  10  -6  -7   -4.10    3.10
 -10   7   7   10.20    5.90
  10   7  -7   16.50    6.10
 -10  -7  -7   12.10    3.60
  10  -7   7   12.30    5.30
 -10  -7   7   24.10    6.50
  10  -7  -7   15.00    4.90
 -10   7  -7   10.80    5.90
  10   0   8  114.59    8.60
 -10   0   8  113.59    5.40
 -10   0  -8  125.39    7.90
 -10   0   8  116.79    8.90
 -10   0  -8  116.79    6.00
  10   0  -8  108.89    8.20
 -10   0   8  121.29    6.50
  10  -1   8   82.79    7.30
 -10  -1  -8   91.19    6.30
 -10   1   8   96.49    8.10
  10   1  -8   75.69    7.40
 -10  -1  -8   91.49    5.70
 -10   1  -8  100.59    7.60
  10   1   8  107.19    8.20
  10  -1  -8  105.99    7.60
 -10  -1   8   96.49    5.90
 -10   1  -8  107.59    5.50
 -10  -1   8  105.09    7.90
 -10   2   8  153.28   11.20
  10   2  -8  148.49   10.40
  10  -2   8  154.58   10.40
 -10  -2  -8  167.38    8.70
 -10  -2  -8  152.08    8.10
 -10  -2   8  150.48    8.60
 -10  -2   8  151.68    9.40
  10  -2  -8  150.78    9.30
  10   2   8  138.09    9.70
 -10   2  -8  151.88   10.30
 -10   2  -8  156.98    7.20
  10   3  -8  373.76   18.40
  10  -3   8  379.86   18.00
 -10  -3  -8  352.76   16.00
 -10  -3  -8  353.66   14.80
 -10   3   8  361.76   18.90
 -10  -3   8  346.57   16.30
  10   3   8  330.67   17.20
  10  -3  -8  353.46   16.30
 -10  -3   8  355.86   16.10
 -10   3  -8  354.16   18.40
  10  -4   8   80.09    8.30
 -10  -4  -8   87.89    6.00
  10   4  -8   85.59    8.70
 -10  -4  -8   90.89    8.40
 -10   4   8   60.09    8.50
 -10  -4   8   83.59    6.50
  10  -4  -8   74.39    7.10
  10   4   8   77.19    7.70
 -10  -4   8   95.09    8.40
 -10   4  -8   72.69    9.00
 -10  -5  -8   18.50    5.20
 -10  -5  -8   21.30    3.70
  10  -5   8   29.00    5.80
  10   5  -8   32.30    6.50
 -10   5   8   27.10    7.00
  10  -5  -8   15.30    4.40
 -10  -5   8   22.90    5.40
  10   5   8   24.40    5.50
 -10   5  -8   21.00    6.20
  10   6  -8   64.89    9.40
 -10  -6  -8   54.09    5.30
 -10  -6  -8   54.59    7.80
  10  -6   8   54.79    7.80
 -10   6   8   43.90    8.30
  10   6   8   55.49    7.60
 -10  -6   8   48.40    7.40
  10  -6  -8   42.70    6.30
 -10   6  -8   45.90    8.70
 -10   0  -9    7.90    2.20
 -10   0  -9    6.20    3.10
  10   0  -9    2.00    3.10
 -10   0   9    1.60    3.60
  10   0   9    8.50    3.60
 -10   0   9    5.20    1.60
 -10   1   9  122.69    9.60
 -10  -1  -9  110.49    7.40
 -10  -1  -9  120.09    6.80
  10  -1   9  103.39    9.00
  10   1  -9  108.99    8.90
  10   1   9  117.79    9.20
  10  -1  -9  123.29    8.80
 -10  -1   9   95.79    6.50
 -10   1  -9  112.99    6.30
 -10   1  -9  105.49    8.50
 -10  -1   9  115.49    9.10
 -10   2   9  428.06   21.40
 -10  -2  -9  440.96   18.20
  10  -2   9  432.16   20.50
  10   2  -9  426.86   20.90
 -10  -2  -9  459.65   18.20
  10   2   9  449.56   20.80
 -10   2  -9  446.36   20.90
 -10   2  -9  443.16   17.20
 -10  -2   9  434.96   19.80
  10  -2  -9  436.56   19.50
 -10  -2   9  437.26   18.40
 -10  -3  -9  171.08   10.40
  10  -3   9  173.88   11.90
  10   3  -9  166.58   12.10
 -10  -3  -9  186.68    9.30
 -10   3   9  171.78   13.20
 -10   3  -9  170.68   12.50
  10  -3  -9  181.88   10.90
  10   3   9  186.48   12.00
 -10  -3   9  179.98   10.70
 -10  -3   9  182.68   10.60
  10  -4   9   48.10    7.10
 -10  -4  -9   51.99    5.10
  10   4  -9   41.30    7.30
 -10  -4  -9   44.00    6.10
 -10   4   9   61.29    9.00
  10  -4  -9   44.00    6.00
  10   4   9   44.50    6.70
 -10  -4   9   42.90    6.20
 -10  -4   9   43.20    5.60
 -10   4  -9   43.40    7.50
 -10  -5  -9    2.30    2.80
  10   5  -9   11.20    5.10
  10  -5   9    2.30    4.00
 -10  -5  -9    5.60    4.50
 -10   5   9   -0.10    4.70
  10  -5  -9    5.70    4.00
 -10  -5   9    5.80    4.10
 -10   5  -9    2.20    4.70
  10   5   9    4.00    4.10
 -10   6   9    6.80    5.50
  10  -6   9   11.90    5.10
  10   6  -9   15.40    5.90
 -10  -6  -9    9.00    5.00
 -10   6  -9    8.30    5.80
 -10  -6   9   12.90    5.10
  10   6   9    9.50    5.20
  10  -6  -9    9.40    4.50
 -10   0 -10  107.59    6.40
  10   0  10   91.39    9.00
  10   0 -10  107.19    9.00
 -10   0 -10   98.99    8.20
 -10   0  10  103.59    9.60
 -10  -1 -10  568.34   22.10
  10  -1  10  564.54   25.60
 -10  -1 -10  587.84   23.70
  10   1 -10  546.55   25.30
 -10   1  10  615.04   27.00
 -10  -1  10  542.55   21.70
  10   1  10  567.14   25.60
 -10   1 -10  573.54   24.90
  10  -1 -10  579.64   24.90
 -10  -1  10  558.04   25.30
 -10   1 -10  597.24   22.20
  10  -2  10   87.29    8.90
 -10   2  10   86.59   10.00
 -10  -2 -10   71.39    6.30
  10   2 -10   73.49    8.50
 -10  -2 -10   75.49    6.70
 -10   2 -10   74.59    8.40
  10  -2 -10   85.69    8.10
 -10  -2  10   85.29    6.60
 -10  -2  10   82.79    8.20
  10   2  10   77.69    8.20
 -10   3  10  160.88   13.10
  10  -3  10  160.58   11.70
 -10  -3 -10  168.78   10.00
 -10  -3 -10  162.48    8.90
  10   3 -10  160.28   12.20
  10  -3 -10  139.19   10.00
 -10   3 -10  141.29   12.00
 -10  -3  10  139.79    9.60
 -10  -3  10  132.39    9.90
  10   3  10  124.09   10.90
  10   4 -10  108.29   10.60
 -10   4  10  101.49   12.10
 -10  -4 -10   91.49    8.50
  10  -4  10  107.99   10.00
 -10  -4 -10  103.19    7.00
  10   4  10  102.29    9.90
 -10   4 -10   96.19   11.20
 -10  -4  10   90.89    8.10
 -10  -4  10  111.19    8.90
  10  -4 -10  107.19    9.00
  10   5 -10   21.10    6.40
 -10   5  10   31.00    8.00
 -10  -5 -10   23.30    5.60
  10  -5  10   21.50    5.70
  10   5  10   25.10    6.20
 -10   5 -10   21.20    7.00
 -10  -5  10   31.10    6.20
  10  -5 -10   19.10    5.10
  10   0 -11    5.40    3.90
 -10   0 -11    3.90    3.50
  10   0  11   12.40    4.80
 -10   0  11    3.80    4.40
 -10   0 -11    3.20    2.40
 -10  -1 -11  167.88   10.50
 -10   1  11  163.98   13.10
 -10  -1 -11  165.08    9.30
  10   1 -11  176.28   12.50
  10  -1  11  158.78   11.90
 -10  -1  11  185.18   12.50
 -10   1 -11  201.68   11.80
  10  -1 -11  180.48   11.90
  10   1  11  170.78   12.50
 -10   1 -11  187.18   11.90
  10   2 -11   21.30    5.70
 -10  -2 -11   30.20    4.60
  10  -2  11   33.60    6.60
 -10   2  11   25.20    6.70
 -10  -2 -11   25.90    4.70
  10  -2 -11   35.00    5.80
  10   2  11   23.30    5.60
 -10  -2  11   38.50    4.80
 -10  -2  11   32.50    6.10
 -10   2 -11   24.90    6.00
 -10  -3 -11  114.69    8.90
  10   3 -11   93.99   10.80
 -10  -3 -11  125.79   10.40
  10  -3  11  142.29   11.40
 -10   3  11  133.69   12.70
 -10   3 -11  124.19   11.60
 -10  -3  11  119.99    9.80
 -10  -3  11  118.69    8.80
  10   3  11  145.29   11.50
  10  -3 -11  111.09    9.60
  10  -4  11   16.00    5.20
 -10  -4 -11    6.70    4.20
 -10   4  11   12.50    6.60
  10   4 -11    8.70    5.40
 -10   4 -11    4.40    5.60
  10   4  11   15.70    5.70
  10  -4 -11    6.50    4.50
 -10  -4  11    9.70    4.30
 -10   0  12  142.59   12.30
  10   0  12  126.89   10.90
 -10   0 -12  126.09   10.00
  10   0 -12  125.69   10.70
 -10   0 -12  128.59    8.20
 -10   1  12   25.60    6.40
  10  -1  12   25.90    6.30
 -10  -1 -12   16.00    3.80
 -10  -1 -12   25.40    5.00
  10   1 -12   24.30    5.80
  10   1  12   12.50    5.50
 -10   1 -12   18.90    5.40
  10  -1 -12   15.20    5.00
 -10  -1  12   14.90    5.40
  10  -2  12   25.50    6.20
  10   2 -12   28.00    6.40
 -10   2  12   19.00    6.60
 -10  -2 -12   22.30    4.40
 -10  -2  12   16.60    5.40
  10  -2 -12   14.60    4.80
  10   2  12   18.20    6.00
 -10   2 -12   15.10    5.50
  10   3 -12   38.70    7.50
 -10   3  12   56.79    9.60
  10  -3  12   57.09    8.80
 -10  -3 -12   48.20    6.20
 -10   3 -12   56.99    8.90
 -10  -3  12   57.99    7.80
  10  -3 -12   39.80    6.50
 -10  -3  12   49.70    7.40
  10   3  12   64.69    9.00
  10   0  13   21.10    5.90
 -10   0 -13   18.00    5.20
  10   0 -13   13.10    5.20
 -10   0  13   19.70    6.60
 -10   1  13    4.00    5.50
  10   1 -13    6.40    4.60
  10  -1  13    5.90    5.10
 -10  -1 -13    5.40    3.30
 -10  -1  13    4.30    5.00
  10  -1 -13   11.20    5.00
 -10   1 -13    7.70    5.00
  10   1  13    1.80    4.90
 -10   2  13  123.69   13.20
 -10  -2 -13  128.39    9.00
 -10  -2  13  122.69   11.20
  11   0   0    0.20    1.70
 -11   0   0    0.60    1.20
  11   0   0   -1.10    1.20
  11   0   0    2.60    2.00
 -11   0   0   -0.90    0.90
 -11   1   0 3575.94  117.89
 -11   1   0 3494.05  116.89
  11   1   0 3521.35  118.59
  11   1   0 3561.54  118.09
  11  -1   0 3491.45  119.59
  11  -1   0 3395.26  117.09
  11   1   0 3525.05  118.09
 -11  -1   0 3379.46  117.39
  11   2   0   30.90    2.40
 -11  -2   0   29.20    3.10
 -11   2   0   32.10    3.50
  11  -2   0   30.20    2.50
  11  -2   0   24.00    4.20
  11   2   0   27.90    3.70
 -11   2   0   32.10    2.50
  11   2   0   35.40    2.80
  11   3   0 1132.99   38.80
  11  -3   0 1146.59   39.60
  11   3   0 1164.28   42.70
  11  -3   0 1233.88   43.80
  11  -3   0 1129.69   40.20
 -11  -3   0 1146.99   40.90
  11   3   0 1179.28   39.00
 -11   3   0 1080.99   41.90
  11  -4   0   24.30    5.00
  11  -4   0   33.40    3.00
  11   4   0   26.30    4.50
 -11   4   0   32.50    4.90
 -11  -4   0   21.10    3.40
  11  -5   0  205.68   12.70
 -11   5   0  196.28   11.50
  11   5   0  184.48   12.00
 -11  -5   0  177.48   10.40
  11  -5   0  186.08    8.80
  11  -6   0    9.10    2.70
  11  -6   0    1.90    4.20
  11   6   0   11.50    4.70
 -11   6   0   11.20    4.30
 -11  -6   0   -2.40    3.10
 -11   7   0   -0.90    3.90
 -11  -7   0   -0.10    3.50
  11   7   0   -1.90    3.80
  11  -7   0    1.70    4.30
  11  -7   0   -1.50    2.40
  11   8   0    5.30    5.20
  11  -8   0   -0.70    2.70
  11  -8   0   -3.70    4.00
 -11  -8   0    2.60    4.10
 -11   0   1 1474.55   48.80
 -11   0  -1 1448.36   48.70
  11   0  -1 1265.17   50.59
 -11   0   1 1451.75   48.40
 -11   0  -1 1449.55   48.40
  11   0   1 1404.26   48.70
  11   0  -1 1391.46   49.00
  11   0   1 1414.36   49.90
 -11   0   1 1418.46   49.90
  11   1  -1  112.09    5.90
 -11   1   1  117.49    5.10
  11   1  -1  112.39    5.70
 -11   1   1  112.69    5.30
 -11   1   1  113.29    6.90
  11  -1   1  121.49    4.80
 -11  -1  -1  115.69    6.20
 -11  -1  -1  106.39    5.90
 -11  -1  -1  108.69    5.30
  11  -1   1  112.99    6.90
  11   1  -1  112.59    6.30
  11  -1  -1   79.99    5.00
  11   1   1   82.19    5.70
  11   1   1   80.09    5.40
 -11   1  -1   87.69    5.50
 -11   2   1  390.46   17.70
  11   2  -1  437.06   15.10
 -11  -2  -1  412.76   15.80
  11  -2   1  414.26   18.00
 -11   2   1  416.56   16.30
  11   2  -1  414.46   15.10
 -11  -2  -1  383.06   15.60
 -11   2   1  420.26   15.40
  11   2  -1  424.86   17.40
  11  -2   1  401.76   14.60
  11  -2  -1  414.06   15.30
 -11  -2   1  406.96   16.00
  11   2   1  394.06   17.00
  11   2   1  422.96   15.40
 -11   2  -1  420.06   16.80
 -11  -3  -1  451.75   15.50
 -11   3   1  419.16   18.70
  11  -3   1  439.96   15.00
  11  -3   1  445.86   18.90
  11  -3   1  446.06   15.70
 -11  -3  -1  422.16   16.40
 -11   3   1  425.86   17.40
  11   3  -1  447.16   18.50
  11   3   1  396.96   17.90
 -11  -3   1  374.96   16.50
 -11   3  -1  375.16   17.60
  11   3   1  368.06   15.00
  11  -3  -1  392.06   15.60
  11   4  -1   86.89    7.40
  11  -4   1   94.19    4.50
  11  -4   1   67.39    7.10
 -11   4   1   85.49    6.50
 -11   4   1   87.59    7.70
 -11  -4  -1   82.49    5.90
  11  -4   1   91.59    5.50
 -11  -4  -1   78.59    3.90
  11   4   1   70.29    7.00
  11  -4  -1   74.89    4.80
 -11   4  -1   64.09    6.60
 -11  -4   1   69.89    6.00
  11   4   1   65.99    3.60
  11  -5   1  259.07   14.90
  11   5  -1  285.57   15.30
 -11   5   1  270.77   14.00
 -11  -5  -1  280.47   13.10
  11  -5   1  266.97   11.40
  11  -5  -1  272.27   12.00
 -11  -5   1  272.47   13.60
 -11   5  -1  260.87   14.70
  11   5   1  299.77   15.30
  11  -6   1  139.79    7.70
  11  -6   1  131.69   10.90
 -11  -6  -1  137.79    9.30
  11   6  -1  142.69   11.30
 -11   6   1  138.99   10.10
 -11   6  -1  150.78   11.20
  11   6   1  144.59   11.30
  11  -6  -1  134.29   11.30
  11  -6  -1  133.69    8.10
 -11  -6   1  125.79    9.60
 -11  -7  -1  216.28   12.60
  11   7  -1  216.48   14.90
 -11   7   1  225.78   14.20
  11  -7   1  219.58   11.00
  11  -7   1  194.78   14.20
  11  -7  -1  213.68   11.40
 -11   7  -1  223.88   15.10
 -11  -7   1  231.08   13.50
  11  -7  -1  232.48   15.40
  11   7   1  235.48   15.40
  11   8  -1   90.99   10.90
 -11  -8  -1   87.39    8.60
  11  -8   1   91.69   11.00
  11  -8  -1   77.09    7.30
 -11  -8   1   71.19    8.50
  11  -8  -1   71.49    8.50
 -11   8  -1   75.59   10.20
  11   8   1   85.99   10.60
  11  -8  -1   70.19   10.10
 -11   0  -2 3923.71  130.49
  11   0  -2 3936.01  131.49
  11   0   2 3748.53  130.49
  11   0   2 3868.21  132.09
 -11   0  -2 3837.02  130.99
 -11   0   2 3958.60  130.49
 -11   0   2 3976.80  132.29
 -11  -1  -2  215.58    8.70
 -11  -1  -2  207.08    9.20
  11  -1   2  223.88   10.50
  11   1  -2  199.28    9.60
  11  -1   2  204.18    7.60
 -11   1   2  221.48    8.60
  11   1  -2  220.68    9.10
 -11   1   2  208.08   10.40
  11  -1  -2  203.38    8.30
  11   1   2  203.88    9.20
 -11   1  -2  207.48    9.30
 -11   1  -2  180.68    7.20
 -11  -1   2  203.88    8.60
  11  -1  -2  188.38    8.80
  11   1   2  206.78    9.20
 -11  -1   2  200.48    9.10
  11  -2   2  958.20   36.90
  11   2  -2  951.40   36.40
  11   2  -2 1013.10   34.10
 -11   2   2  907.71   34.90
 -11  -2  -2  969.80   35.10
 -11   2   2  953.00   37.00
 -11  -2  -2  979.30   34.80
  11   2   2  983.70   36.10
  11  -2  -2 1017.40   34.80
  11   2   2 1032.70   34.90
 -11  -2   2 1006.40   35.20
 -11   2  -2 1059.59   36.50
  11   3  -2  156.38    9.40
 -11   3   2  154.98    9.60
 -11  -3  -2  154.08    7.50
  11  -3   2  153.28    5.90
 -11  -3  -2  153.48    7.20
  11  -3   2  148.39    9.40
  11  -3   2  155.18    6.30
 -11   3   2  159.38    8.10
 -11  -3   2  165.48    8.40
  11  -3  -2  151.68    7.40
  11   3   2  155.78    9.10
  11   3   2  143.09    7.00
 -11   3  -2  155.78    9.30
  11  -4   2  236.58   13.70
  11   4  -2  242.58   13.70
  11  -4   2  235.48   10.00
 -11   4   2  272.27   14.40
 -11  -4  -2  249.58   11.60
  11  -4   2  258.67   10.80
 -11   4   2  246.18   12.30
 -11  -4  -2  265.37   10.70
  11  -4  -2  289.07   11.50
  11   4   2  280.77   13.90
 -11   4  -2  260.47   13.90
 -11  -4   2  268.67   12.70
  11   4   2  291.57   10.80
  11  -5   2  130.49   10.10
 -11   5   2  140.39   10.70
  11   5  -2  140.79   10.40
  11  -5   2  132.19    6.80
 -11  -5  -2  134.29    8.50
 -11   5   2  131.79    8.90
  11  -5  -2  144.09    7.80
 -11   5  -2  143.49   10.50
  11   5   2  145.19    6.70
  11   5   2  154.28   10.60
 -11  -5   2  146.99    9.40
 -11   6   2   93.79    8.30
 -11  -6  -2   99.39    7.80
  11  -6   2  111.39    9.90
  11  -6   2   96.09    6.20
 -11   6   2  106.79   10.00
  11   6  -2  106.89   10.20
 -11   6  -2  100.29    9.80
  11   6   2  113.19   10.30
  11  -6  -2   99.79    7.10
 -11  -6   2  108.49    8.90
  11  -7   2   14.60    3.20
 -11  -7  -2   12.80    4.10
  11   7  -2   18.30    6.00
  11  -7   2   15.00    5.50
 -11   7   2   17.30    4.90
  11   7   2   21.80    6.10
 -11   7  -2   15.70    5.90
  11  -7  -2   13.50    3.80
 -11  -7   2   17.80    4.70
 -11  -8  -2   83.99    8.40
  11  -8   2   80.69    9.90
  11   8  -2   85.49   10.90
  11  -8  -2   69.89    7.30
  11   8   2   74.39   10.20
  11  -8  -2   76.79   10.80
  11  -8  -2   81.79    8.70
 -11   8  -2   79.49   10.70
 -11  -8   2   72.19    8.80
  11   0  -3 1673.93   57.89
 -11   0  -3 1639.44   57.19
  11   0   3 1657.53   56.49
 -11   0   3 1683.03   56.39
 -11   0  -3 1679.83   56.59
 -11   0   3 1637.04   58.29
  11   0   3 1651.13   58.39
 -11  -1  -3  702.03   27.20
  11   1  -3  734.13   28.00
  11  -1   3  768.62   28.70
 -11   1   3  730.93   28.60
 -11   1   3  790.92   26.30
  11   1  -3  761.42   27.20
 -11  -1  -3  730.03   26.70
  11   1   3  723.93   27.10
 -11   1  -3  753.92   27.70
  11  -1  -3  780.22   27.50
  11   1   3  744.93   27.50
 -11  -1   3  724.13   27.30
  11  -1  -3  766.82   26.10
 -11  -1   3  732.03   26.70
  11  -2   3  721.83   30.40
 -11   2   3  772.92   31.00
 -11   2   3  745.33   28.40
  11   2  -3  754.12   30.20
 -11  -2  -3  768.62   28.40
  11   2  -3  785.22   28.00
 -11   2  -3  847.12   30.50
 -11  -2   3  837.52   28.50
  11  -2  -3  802.42   28.90
  11   2   3  812.22   29.80
  11   2   3  860.11   29.20
 -11  -2   3  808.42   29.10
  11  -2  -3  838.12   27.70
 -11   3   3   99.09    6.00
 -11   3   3   95.99    8.00
  11   3  -3  100.29    7.60
 -11  -3  -3   84.89    5.50
  11   3  -3  103.29    4.10
  11  -3   3  100.49    7.50
 -11   3  -3   95.19    7.50
  11  -3  -3  105.39    6.00
  11   3   3  106.09    7.30
 -11  -3   3  107.39    6.60
  11   3   3  110.49    6.00
 -11   4   3  129.99    7.60
  11  -4   3  124.09    5.90
 -11  -4  -3  136.39    7.30
 -11   4   3  121.89    9.50
  11  -4   3  124.99    5.40
  11  -4   3  131.29    9.00
  11   4  -3  137.09    9.50
 -11  -4   3  133.59    8.30
  11   4   3  129.39    6.80
  11   4   3  128.49    9.00
 -11   4  -3  130.29    9.50
  11  -4  -3  117.69    7.00
  11  -5   3  116.39    6.00
 -11   5   3  106.49    9.40
 -11  -5  -3  117.39    7.70
  11  -5   3  135.89    9.80
 -11   5   3  123.09    8.10
  11   5  -3  108.89    9.60
  11   5   3  131.89    9.90
  11  -5  -3  129.69    7.60
 -11   5  -3  130.19   10.50
  11   5   3  132.59    7.00
 -11  -5   3  132.79    9.10
 -11   6   3  332.37   18.40
  11  -6   3  319.47   13.30
  11  -6   3  334.07   17.30
  11   6  -3  281.07   17.30
 -11   6   3  316.27   15.80
 -11  -6  -3  342.07   15.10
  11   6   3  328.37   17.60
  11  -6  -3  296.67   14.30
 -11  -6   3  296.97   16.10
 -11   6  -3  296.97   17.90
  11   7  -3   24.90    6.60
  11  -7   3   20.30    5.80
 -11   7   3   19.50    6.00
 -11  -7  -3   27.60    5.00
 -11  -7   3   22.00    5.60
 -11   7  -3   24.40    6.50
  11   7   3   28.70    6.50
  11  -7  -3   20.30    4.30
  11  -7  -3   27.00    4.80
  11   0  -4    8.50    2.40
 -11   0   4    4.60    2.40
 -11   0   4    7.80    1.50
  11   0   4    3.60    2.10
 -11   0  -4    2.80    1.80
  11   0   4    3.70    1.20
 -11   0  -4    5.00    1.60
 -11   1   4 1021.00   39.30
  11   1  -4 1032.50   38.70
 -11   1   4 1082.59   36.50
 -11  -1  -4 1021.60   37.20
  11  -1   4 1010.20   39.10
 -11  -1   4 1072.09   38.20
  11   1   4 1045.30   38.30
 -11  -1   4 1082.29   37.20
  11  -1  -4 1101.89   36.60
  11   1   4 1050.99   37.50
 -11   1  -4 1064.59   38.40
  11  -1  -4 1119.69   38.40
 -11   2   4   74.09    4.30
  11   2  -4   83.39    4.60
  11  -2   4   73.29    6.60
  11   2  -4   68.39    6.10
 -11  -2  -4   75.49    4.70
 -11   2   4   77.19    6.90
 -11  -2   4   75.79    5.30
  11   2   4   81.49    5.40
  11  -2  -4   81.19    5.50
 -11   2  -4   76.39    6.20
  11  -2  -4   77.69    3.70
  11   2   4   76.19    5.70
 -11  -2   4   77.69    4.90
 -11  -3  -4  285.17   12.20
  11   3  -4  288.97   11.30
 -11   3   4  292.97   12.30
 -11   3   4  271.67   14.80
  11  -3   4  282.37   14.60
  11   3  -4  272.07   14.40
  11  -3  -4  313.27   11.20
 -11   3  -4  303.27   14.90
 -11  -3   4  317.87   13.60
  11  -3  -4  315.27   12.90
  11   3   4  317.47   14.20
 -11  -3   4  314.97   11.60
  11   3   4  304.27   13.20
  11  -4   4   23.60    2.00
 -11   4   4   33.10    5.90
 -11  -4  -4   24.30    3.20
  11   4  -4   26.40    4.80
  11  -4   4   17.50    4.00
 -11   4   4   25.30    3.60
  11  -4   4   26.20    1.90
 -11   4  -4   23.40    5.10
  11   4   4   28.50    4.80
  11   4   4   23.90    3.50
  11  -4  -4   21.50    3.40
 -11  -4   4   20.60    3.90
  11   5  -4  108.79    9.50
  11  -5   4  116.59    9.10
 -11  -5  -4  127.59    7.40
 -11   5   4  106.49    7.30
 -11   5   4  128.89   10.40
 -11  -5   4   99.09    8.50
 -11   5  -4   94.69   10.20
  11   5   4  102.09    6.80
  11  -5  -4   94.09    7.00
  11   5   4  103.09    8.90
  11  -6   4  394.86   19.90
 -11  -6  -4  432.86   17.70
 -11   6   4  417.86   21.20
  11   6  -4  382.16   20.70
 -11  -6   4  373.86   19.10
 -11   6  -4  380.46   21.30
  11   6   4  422.76   20.50
  11  -6  -4  380.16   17.30
  11  -7   4   26.90    6.00
 -11  -7  -4   25.00    4.80
  11   7  -4   12.20    5.70
 -11   7   4   20.10    6.20
 -11  -7   4   22.90    6.00
  11   7   4   21.90    6.10
  11  -7  -4   25.90    4.80
  11  -7  -4   29.00    6.50
 -11   7  -4   25.20    6.90
  11   0  -5   33.00    4.20
 -11   0  -5   30.90    3.00
 -11   0   5   27.20    3.90
 -11   0  -5   27.00    3.30
  11   0   5   27.60    3.80
 -11   0  -5   31.10    2.50
  11   0  -5   32.60    3.60
 -11   0   5   36.30    2.60
 -11   1   5 1115.79   41.20
 -11   1   5 1074.19   37.70
  11  -1   5 1107.89   40.90
  11   1  -5 1142.29   40.70
 -11  -1  -5 1071.59   38.90
  11   1   5 1126.69   38.90
  11  -1  -5 1089.29   40.00
  11   1   5 1094.09   40.20
 -11  -1   5 1104.39   38.60
 -11  -1   5 1067.79   39.80
 -11   1  -5 1091.79   40.10
  11  -1  -5 1111.99   38.00
 -11   2   5  366.06   13.00
 -11   2   5  334.97   16.20
  11  -2   5  343.47   15.90
  11   2  -5  322.07   15.60
 -11  -2  -5  348.77   13.70
  11   2   5  327.87   14.50
 -11  -2   5  340.77   14.30
  11  -2  -5  346.47   14.50
  11  -2  -5  352.46   12.40
 -11  -2   5  337.27   14.20
 -11   2  -5  315.17   15.30
  11   2   5  344.67   15.00
 -11  -3  -5  177.18    8.40
  11   3  -5  177.28   10.80
 -11   3   5  182.98   11.50
  11   3  -5  173.08    7.90
 -11   3   5  170.38    7.90
  11  -3   5  183.98   11.00
 -11   3  -5  179.38   11.10
 -11  -3   5  188.38    9.90
  11  -3  -5  182.48    7.00
 -11  -3   5  198.38    8.50
  11   3   5  179.78    9.60
  11   3   5  190.08   10.30
  11  -3  -5  179.18    9.30
 -11   4   5   32.70    5.70
  11  -4   5   37.30    5.40
  11   4  -5   46.40    6.40
 -11  -4  -5   39.60    4.00
 -11   4   5   48.00    3.90
  11   4   5   35.70    5.10
 -11  -4   5   37.50    2.90
  11  -4  -5   39.80    4.60
  11   4   5   29.50    4.20
 -11  -4   5   27.80    4.80
  11  -4  -5   33.90    3.20
 -11   4  -5   38.00    6.30
 -11   5   5  135.59   11.20
  11   5  -5  118.29   10.10
 -11  -5  -5  124.59    7.30
  11  -5   5  127.59    9.80
 -11   5  -5  123.29   10.90
  11   5   5  119.89    9.50
 -11  -5   5  122.29    9.40
  11   5   5  114.69    7.80
  11  -5  -5  118.89    7.90
  11   6  -5  175.58   13.00
  11  -6   5  166.68   12.00
 -11   6   5  179.38   13.60
 -11  -6  -5  173.58    9.70
  11   6   5  164.28   13.70
 -11  -6   5  179.28   12.10
  11   6   5  173.28   12.60
  11  -6  -5  179.18   10.30
 -11   6  -5  157.88   13.00
 -11   7   5   35.90    7.90
 -11  -7  -5   22.50    4.40
  11   7  -5   26.50    6.90
  11  -7   5   20.20    5.60
 -11  -7   5   21.40    5.90
  11   7   5   17.90    5.50
 -11   7  -5   31.80    7.50
  11  -7  -5   18.60    4.60
 -11   0   6  524.85   21.80
  11   0  -6  546.35   20.80
 -11   0  -6  494.25   20.50
 -11   0   6  519.35   18.80
  11   0  -6  540.85   21.70
  11   0   6  529.45   21.70
 -11   0  -6  517.15   18.70
 -11   0  -6  510.05   19.60
 -11  -1  -6   17.30    2.70
  11  -1   6   18.40    3.80
  11   1  -6   20.20    3.90
 -11   1   6   17.00    4.10
 -11  -1  -6   21.80    3.00
 -11   1   6   17.00    1.70
 -11  -1   6   16.80    2.60
 -11  -1   6   11.10    3.10
 -11   1  -6   10.30    2.90
  11  -1  -6   13.10    1.90
 -11   1  -6   14.60    1.90
  11  -1  -6   12.90    3.00
  11   1   6   12.70    3.10
 -11   1  -6   18.00    1.70
 -11   2   6  764.72   27.00
 -11  -2  -6  757.32   28.50
  11  -2   6  777.12   31.00
  11   2  -6  767.72   31.00
 -11   2   6  779.42   31.60
  11  -2  -6  799.02   29.70
  11  -2  -6  803.62   27.00
 -11  -2   6  801.52   29.50
 -11  -2   6  791.02   29.20
 -11   2  -6  776.12   30.90
  11   2   6  785.12   30.40
  11   3  -6   52.59    6.50
 -11  -3  -6   42.10    4.20
 -11   3   6   44.80    6.30
  11  -3   6   33.60    5.10
 -11   3  -6   38.00    6.00
  11   3   6   34.10    4.60
  11   3   6   51.39    5.70
 -11  -3   6   37.20    4.80
  11  -3  -6   31.50    4.50
 -11  -3   6   32.00    3.80
 -11  -4  -6  217.58    9.90
  11  -4   6  212.98   12.80
 -11   4   6  206.28   13.60
  11   4  -6  220.18   13.10
 -11  -4   6  210.18   11.70
  11   4   6  190.08   11.10
 -11   4  -6  207.58   13.40
  11   4   6  203.18   11.80
 -11  -4   6  211.58    9.30
  11  -4  -6  210.48   11.00
  11   5  -6   -1.00    3.40
 -11   5   6   11.80    5.10
  11  -5   6    4.80    3.80
 -11  -5  -6    1.90    2.60
 -11  -5   6    2.40    3.50
  11   5   6    4.50    3.10
  11  -5  -6    1.90    3.10
 -11   5  -6   -1.00    3.90
  11   5   6    8.00    3.90
  11  -6   6   95.29    9.20
 -11   6   6   98.69   11.30
 -11  -6  -6   92.29    6.80
  11   6  -6   94.69   10.70
  11   6   6   93.29    9.40
  11   6   6   83.79    7.70
 -11   6  -6   91.69   11.20
 -11  -6   6   89.09    9.20
  11  -6  -6   90.29    7.70
 -11   7   6    5.50    5.30
  11  -7   6    1.60    4.20
  11   7  -6   -6.00    3.60
 -11  -7  -6    1.10    3.20
 -11   7  -6    3.30    5.30
 -11  -7   6    2.50    4.20
  11  -7  -6   -0.30    3.60
  11   7   6    3.80    4.50
 -11   0   7  499.75   18.20
  11   0  -7  493.85   21.30
 -11   0   7  516.85   21.80
 -11   0  -7  510.05   18.40
  11   0   7  493.45   21.30
 -11   0  -7  486.85   20.30
 -11   0   7  521.05   20.40
 -11   1   7   81.29    7.50
 -11  -1  -7   88.69    5.30
  11   1  -7   85.39    7.10
 -11  -1  -7   82.69    5.60
 -11   1   7   81.39    3.70
 -11   1   7   87.69    4.60
  11  -1   7   88.69    7.20
 -11   1  -7   64.59    6.20
 -11   1  -7   67.19    4.40
 -11  -1   7   79.39    5.10
 -11  -1   7   72.49    6.40
  11   1   7   72.49    6.30
 -11   1  -7   74.99    4.10
  11  -1  -7   65.09    6.20
 -11  -2  -7  227.98   10.90
 -11   2   7  238.68   13.30
  11  -2   7  225.58   12.40
  11   2  -7  238.98   12.90
 -11  -2  -7  230.68   10.40
  11  -2  -7  224.48   11.60
  11   2   7  214.38   12.00
 -11   2  -7  219.38   12.50
 -11  -2   7  224.58   11.40
 -11  -2   7  210.98   10.70
 -11   3   7   17.70    4.70
 -11  -3  -7   15.10    2.90
  11   3  -7   17.70    4.30
  11  -3   7   22.00    5.00
 -11  -3  -7    9.50    3.60
 -11   3  -7   12.90    4.50
 -11  -3   7   14.20    3.20
  11   3   7   14.20    3.80
 -11  -3   7   10.10    3.40
  11  -3  -7   13.60    3.70
 -11   4   7  311.37   17.60
 -11  -4  -7  308.07   13.10
  11  -4   7  295.57   16.00
  11   4  -7  305.47   16.70
  11  -4  -7  306.67   14.40
 -11  -4   7  311.67   13.30
  11   4   7  288.47   15.00
 -11   4  -7  323.97   17.60
 -11  -4   7  291.27   15.10
 -11   5   7   15.20    5.60
 -11  -5  -7    8.80    3.10
  11   5  -7   13.60    5.00
  11  -5   7    9.10    4.20
  11   5   7   12.50    4.10
 -11  -5   7    5.00    4.00
  11   5   7    6.80    3.60
  11  -5  -7   12.10    4.00
 -11   5  -7   -0.60    4.40
 -11  -6  -7   66.99    5.90
 -11   6   7   55.99    9.40
  11  -6   7   63.59    8.40
  11   6  -7   73.79    9.60
  11  -6  -7   65.09    7.00
 -11   6  -7   51.39    8.80
  11   6   7   56.39    7.60
 -11  -6   7   66.29    8.30
  11   6   7   69.79    7.80
 -11   0  -8  196.48    8.20
  11   0  -8  177.18   10.80
 -11   0  -8  183.38   10.10
 -11   0   8  165.98   11.20
 -11   0   8  172.58    7.60
  11   0   8  194.58   11.30
 -11  -1  -8  438.56   18.00
 -11  -1  -8  435.66   16.90
  11  -1   8  445.06   19.90
  11   1  -8  413.56   19.60
 -11   1   8  457.35   15.10
 -11   1   8  437.36   20.50
 -11   1  -8  429.76   16.30
  11  -1  -8  435.56   19.30
 -11   1  -8  417.56   19.20
 -11  -1   8  402.86   16.80
 -11  -1   8  429.96   19.50
  11   1   8  411.86   19.40
  11   2  -8  171.38   11.10
 -11  -2  -8  148.59    8.40
 -11   2   8  159.48   11.20
 -11  -2  -8  175.98    9.10
  11  -2   8  153.48   10.30
 -11   2  -8  162.28    7.00
  11  -2  -8  149.79    9.70
  11   2   8  154.08   10.20
 -11   2  -8  148.19   10.40
 -11  -2   8  148.59    8.70
 -11  -2   8  152.78    9.70
 -11   3   8   87.49    9.50
  11   3  -8   92.59    9.00
  11  -3   8   92.99    8.60
 -11  -3  -8   93.29    6.40
 -11  -3  -8  108.49    7.90
 -11  -3   8  107.49    7.40
  11   3   8  107.49    8.60
 -11  -3   8   94.89    7.60
  11  -3  -8   96.59    7.70
 -11   3  -8  105.39    9.70
 -11  -4  -8   84.99    6.20
  11   4  -8   88.59    9.30
 -11   4   8   93.29   10.50
 -11  -4  -8   95.59    8.90
  11  -4   8   86.19    8.80
  11   4   8   91.49    8.30
 -11  -4   8   92.49    8.10
 -11   4  -8   98.29   10.10
 -11  -4   8   95.29    6.90
  11  -4  -8   79.49    7.60
  11  -5   8   94.49    9.60
 -11   5   8  112.39   11.60
 -11  -5  -8  124.49   10.00
 -11  -5  -8  113.69    7.10
  11   5  -8  107.19   10.50
  11  -5  -8  102.69    8.50
 -11  -5   8   98.29    9.30
 -11   5  -8  111.89   11.60
  11   5   8  107.69    9.40
  11  -6   8   31.20    6.40
 -11  -6  -8   28.80    4.30
  11   6  -8   29.60    7.20
 -11   6   8   26.10    7.40
 -11  -6  -8   31.00    6.40
 -11  -6   8   28.70    6.10
  11  -6  -8   25.70    5.30
 -11   6  -8   20.20    6.90
  11   6   8   23.10    5.60
  11   0   9    7.80    3.90
 -11   0  -9    4.20    2.90
 -11   0  -9   10.30    2.30
  11   0  -9   12.10    3.90
 -11   0   9    8.80    1.80
 -11   0   9    1.10    3.80
 -11   1   9  606.94   26.10
  11  -1   9  526.25   24.50
  11   1  -9  483.05   24.20
 -11  -1  -9  550.74   22.90
 -11  -1  -9  550.84   21.50
  11   1   9  560.64   25.00
 -11  -1   9  562.14   21.50
 -11   1  -9  604.24   24.60
 -11   1  -9  592.04   21.30
 -11  -1   9  577.64   24.90
  11  -1  -9  618.24   24.70
 -11   2   9   17.60    5.40
  11   2  -9   19.10    4.80
 -11  -2  -9   12.00    3.40
 -11  -2  -9   12.90    3.30
  11  -2   9   12.60    4.60
 -11  -2   9    7.40    3.60
 -11  -2   9    8.00    2.90
  11  -2  -9   11.10    4.00
 -11   2  -9    4.80    3.80
  11   2   9   11.20    4.10
  11   3  -9  148.39   11.50
 -11  -3  -9  155.48    9.60
 -11   3   9  136.79   12.10
  11  -3   9  128.79   10.30
 -11  -3  -9  144.29    8.30
 -11  -3   9  163.58    9.80
  11   3   9  154.78   11.10
 -11   3  -9  140.69   11.80
 -11  -3   9  154.98    9.70
  11  -3  -9  149.79    9.90
 -11  -4  -9  101.39    7.00
  11  -4   9  102.79    9.70
  11   4  -9  103.69   10.40
 -11   4   9   82.69   10.30
 -11  -4  -9   85.69    8.40
 -11  -4   9  108.89    8.70
  11   4   9  112.99    9.90
 -11   4  -9  111.39   10.90
 -11  -4   9  102.09    7.90
  11  -4  -9  100.39    8.50
 -11   5   9   70.89   10.30
  11  -5   9   63.79    8.60
 -11  -5  -9   63.99    7.70
 -11  -5  -9   81.59    6.40
  11   5  -9   78.89   10.40
 -11   5  -9   80.09   10.30
  11  -5  -9   81.29    8.40
  11   5   9   74.59    8.90
 -11  -5   9   82.59    8.50
 -11  -6  -9   -3.00    4.40
  11  -6  -9    1.30    4.00
  11   0 -10   76.89    8.00
 -11   0 -10   63.49    7.00
  11   0  10   77.99    8.80
 -11   0  10   63.29    8.00
 -11   0 -10   70.79    5.20
 -11   1  10   14.10    5.20
 -11  -1 -10   15.80    3.90
 -11  -1 -10   17.40    3.40
  11   1 -10   14.70    4.70
  11  -1  10   17.20    4.70
  11  -1 -10   19.50    4.70
 -11   1 -10   23.10    3.40
 -11  -1  10   24.10    5.50
 -11   1 -10   21.50    4.90
  11   1  10   26.50    5.20
 -11  -1  10   25.00    3.40
 -11  -2 -10  135.19    8.40
 -11   2  10  132.89   11.70
  11  -2  10  124.99   10.10
  11   2 -10  121.19   10.50
 -11  -2 -10  130.69    8.60
  11   2  10  144.09   10.80
 -11   2 -10  127.19   10.60
 -11  -2  10  149.59   10.30
 -11  -2  10  142.19    8.30
  11  -2 -10  124.89    9.90
  11   3 -10  132.99   11.50
 -11  -3 -10  139.19    9.30
 -11   3  10  129.59   11.70
 -11  -3 -10  134.39    8.30
  11  -3  10  138.99   10.70
 -11  -3  10  130.79    9.20
  11   3  10  130.69   10.70
  11  -3 -10  119.69    9.70
 -11  -3  10  126.29    9.50
 -11   3 -10  126.09   11.20
  11   4 -10   85.69   10.40
 -11  -4 -10   79.19    6.40
 -11  -4 -10   75.59    7.70
 -11   4  10   86.89   10.60
  11  -4  10   87.29    9.30
  11   4  10   68.39    8.80
 -11  -4  10   77.69    8.00
  11  -4 -10   70.39    7.70
 -11   4 -10   65.19    9.30
  11  -5  10   94.29   10.10
  11   5 -10   94.29   11.50
 -11  -5 -10  112.09   10.20
 -11   5  10  118.29   13.30
  11   5  10  100.59   10.60
  11  -5 -10  115.09    9.60
 -11  -5  10  101.69    9.80
 -11   5 -10   86.09   11.20
  11   0 -11  271.07   15.40
  11   0  11  263.77   15.80
 -11   0  11  263.07   16.00
 -11   0 -11  240.88   11.70
 -11   0 -11  263.17   14.30
 -11   1  11   28.40    6.40
  11  -1  11   34.90    6.60
 -11  -1 -11   31.80    5.20
  11   1 -11   34.50    6.20
 -11  -1 -11   29.40    4.10
  11  -1 -11   26.30    5.40
  11   1  11   35.50    6.60
 -11   1 -11   23.70    5.50
 -11  -1  11   28.20    6.00
  11  -2  11  242.88   15.10
 -11  -2 -11  235.18   12.40
 -11   2  11  254.77   16.40
 -11  -2 -11  237.08   11.80
  11   2 -11  197.18   14.10
 -11   2 -11  227.98   14.50
 -11  -2  11  220.88   11.40
 -11  -2  11  219.98   14.00
  11  -2 -11  205.58   13.30
  11   2  11  216.48   14.40
 -11  -3 -11   19.40    4.10
  11   3 -11   17.60    5.70
  11  -3  11   14.60    5.50
 -11   3  11   20.80    6.30
 -11  -3 -11   19.70    4.70
  11  -3 -11   15.80    5.00
 -11   3 -11   13.40    5.80
  11   3  11   23.90    6.10
 -11  -3  11   23.20    5.20
 -11  -3  11   15.90    4.00
 -11   4  11   36.70    8.00
  11   4 -11   33.20    7.40
  11  -4  11   29.20    6.50
 -11  -4 -11   36.60    5.90
 -11   4 -11   32.20    7.60
  11   4  11   44.90    7.90
  11  -4 -11   28.80    5.90
 -11  -4  11   39.20    6.10
 -11   0 -12   36.60    6.30
  11   0 -12   38.20    6.80
 -11   0  12   36.20    7.20
  11   0  12   51.29    8.20
  11  -1  12   65.89    9.20
 -11  -1 -12   60.49    7.00
 -11   1  12   68.39    9.80
 -11  -1 -12   56.69    6.00
  11   1 -12   59.59    8.20
 -11   1 -12   74.99    8.70
  11  -1 -12   50.39    7.50
  11   1  12   50.09    7.90
 -11  -1  12   52.79    7.90
 -11   2  12   55.49    9.10
 -11  -2 -12   48.10    5.70
  11   2 -12   57.89    8.20
  11  -2  12   55.79    8.50
  11  -2 -12   51.49    7.50
 -11   2 -12   44.90    7.60
 -11  -2  12   53.19    7.90
  11   2  12   55.39    8.00
  11  -3  12   14.10    5.80
  11   3 -12    8.60    5.10
 -11  -3 -12    7.40    4.10
 -11   3  12   10.00    5.90
  11  -3 -12   13.20    5.20
 -11   3 -12   10.30    5.40
 -11  -3  12   19.40    5.40
  11   3  12    9.00    5.00
  11   0 -13    0.80    3.60
 -11   0 -13   -1.80    3.90
 -11   0  13   -2.00    4.40
  11   0  13   -0.30    4.60
 -11   1  13   63.79   10.20
  11  -1  13   68.79    9.20
  11   1 -13   73.49    9.50
 -11  -1  13   79.49   10.20
  11   1  13   76.89   10.20
  11  -1 -13   64.19    8.70
 -11   1 -13   76.19    9.20
  12   0   0 4339.07  149.69
  12   0   0 4504.25  150.98
 -12   0   0 4429.36  149.29
 -12   0   0 4540.25  149.49
  12   1   0 1290.97   44.90
 -12   1   0 1296.57   44.60
  12  -1   0 1262.07   46.30
 -12   1   0 1307.67   43.60
  12   1   0 1302.77   44.90
 -12  -1   0 1213.88   44.00
  12  -1   0 1244.68   43.90
  12   1   0 1285.97   45.30
  12  -2   0 1144.19   38.60
 -12   2   0 1118.49   40.10
  12  -2   0 1140.49   41.90
  12   2   0 1129.49   39.00
  12   2   0 1095.49   38.70
 -12  -2   0 1076.89   39.30
[truncated: 344,346 more chars]
