# Supplementary material for: The Electronic Properties of Cadmium Naphthalene Diimide Coordination Complex
Source: Molecules. 2023 Apr 25;28(9):3709. doi: 10.3390/molecules28093709 (PMC10180404; doi:10.3390/molecules28093709)
Supplement: Supplementary file 1 [file molecules-28-03709-s001.zip › molecules-2308228 supplementary materials.pdf]

## Supplementary Materials

### The Electronic Properties of Cadmium Naphthalene Diimide Coordination Complex

Wajid Hussain, Maroof Ahmad Khan, Zhongkui Li, Muhammad Javed Iqbal, Mubashar

Ilyas and Hui Li\*

*Key Laboratory of Cluster Sciences of Ministry of Education Beijing Key Laboratory of Photoelectronic/ Electro photonic Conversion Materials, School of Chemistry and Chemical Engineering, Beijing Institute of Technology, Beijing 102488, People's Republic of China.*

\* Correspondence: [lihui@bit.edu.cn](mailto:lihui@bit.edu.cn)

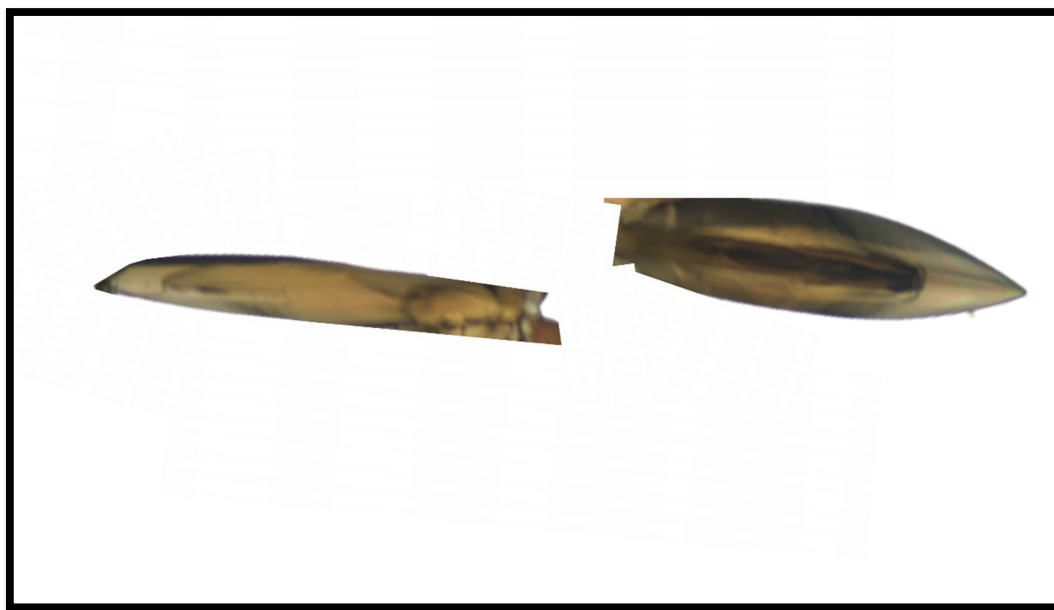

Figure S1: Image of Cd-NDI complex crystal.

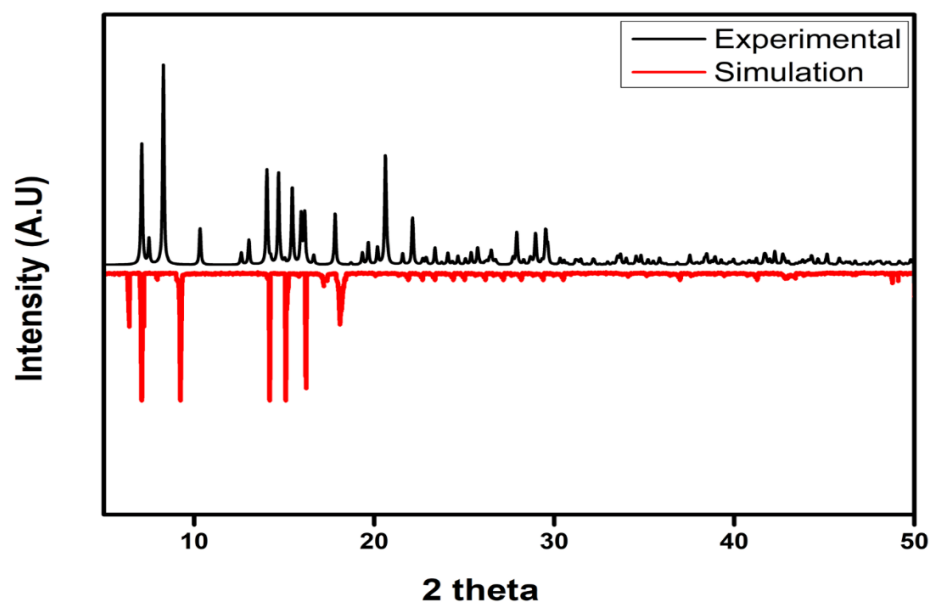

Figure S2: PXRD of Cd-NDI complex crystal.

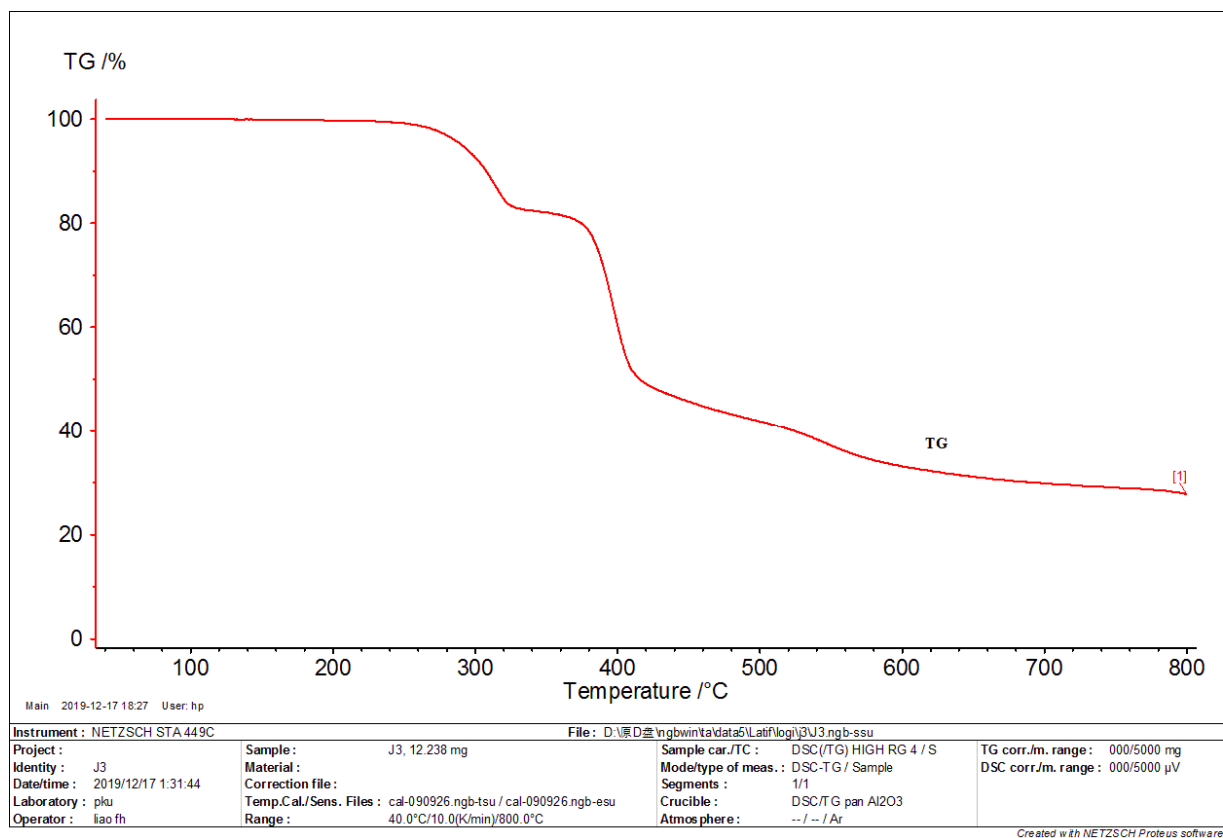

Figure S3: TGA of Cd-NDI complex crystal.

**Table S1: Fractional Atomic Coordinates ( $\times 10^4$ ) and Equivalent Isotropic Displacement Parameters ( $\text{\AA}^2 \times 10^3$ ) for *Cd*-NDI complex.  $U_{\text{eq}}$  is defined as 1/3 of of the trace of the orthogonalised  $U_{ij}$  tensor.**

| Atom | <i>x</i>   | <i>Y</i>  | <i>z</i>  | $U(\text{eq})$ |
|------|------------|-----------|-----------|----------------|
| Cd1  | 5000       | 0         | 1159.0(5) | 43.1(2)        |
| O1   | 1371.0(17) | 7616(6)   | 6733(4)   | 38.9(10)       |
| O4   | 4062.3(16) | 1154(6)   | 1492(3)   | 37.2(9)        |
| O6   | 2256.3(19) | 10626(6)  | 4541(4)   | 37.7(10)       |
| O8   | 3889(2)    | 5283(7)   | 938(4)    | 54.2(13)       |
| O10  | 996(2)     | 6133(7)   | 4510(5)   | 55.0(13)       |
| N1   | 1619(2)    | 8403(7)   | 4510(4)   | 32.9(11)       |
| O12  | 2531(2)    | 1205(6)   | 533(4)    | 55.7(13)       |
| O3   | 577.1(19)  | 9029(8)   | 6548(5)   | 56.6(14)       |
| N2   | 3207(2)    | 3254(7)   | 731(4)    | 38.3(12)       |
| C1   | 2462(2)    | 7999(7)   | 3452(5)   | 29.2(11)       |
| C4   | 2271(2)    | 6301(7)   | 3056(5)   | 31.3(12)       |
| O7   | 4400(3)    | 872(9)    | -195(4)   | 74.7(19)       |
| C6   | 2955(3)    | 8638(7)   | 3109(5)   | 33.5(12)       |
| C8   | 1241(3)    | 9578(8)   | 5151(5)   | 40.1(14)       |
| C10  | 2699(3)    | 2591(8)   | 983(5)    | 39.8(14)       |
| C12  | 2384(3)    | 3625(8)   | 1818(5)   | 37.5(13)       |
| C14  | 4035(3)    | 1399(9)   | 449(5)    | 39.7(14)       |
| C16  | 2582(2)    | 5285(8)   | 2278(4)   | 32.4(12)       |
| C18  | 2119(2)    | 9111(8)   | 4211(5)   | 30.1(13)       |
| C20  | 1023(3)    | 8684(9)   | 6197(5)   | 40.0(13)       |
| C5   | 1764(3)    | 5611(8)   | 3398(6)   | 38.1(13)       |
| C11  | 3426(3)    | 4881(9)   | 1169(4)   | 40.2(13)       |
| C3   | 3273(3)    | 7612(8)   | 2359(5)   | 36.4(13)       |
| C13  | 1432(3)    | 6667(8)   | 4181(5)   | 38.6(14)       |
| C7   | 1875(3)    | 3039(9)   | 2130(7)   | 50.8(18)       |
| C15  | 3091(3)    | 5972(8)   | 1950(5)   | 33.1(12)       |
| C2   | 3532(3)    | 2203(9)   | -94(5)    | 44.3(16)       |
| C17  | 3648(4)    | 3288(10)  | -1178(5)  | 61(2)          |
| C9   | 793(3)     | 10273(11) | 4369(7)   | 57(2)          |
| C19  | 1571(3)    | 4021(9)   | 2947(7)   | 50.4(17)       |
| O2   | 4749(4)    | -2500(14) | 2002(8)   | 68(4)          |

**Table S2: Anisotropic Displacement Parameters ( $\text{\AA}^2 \times 10^3$ ) for *Cd-NDI complex*. The Anisotropic displacement factor exponent takes the form:  $-2\pi^2[h^2a^{*2}U_{11}+2hka^*b^*U_{12}+\dots]$ .**

| Atom | U <sub>11</sub> | U <sub>22</sub> | U <sub>33</sub> | U <sub>23</sub> | U <sub>13</sub> | U <sub>12</sub> |
|------|-----------------|-----------------|-----------------|-----------------|-----------------|-----------------|
| Cd1  | 27.6(3)         | 61.9(4)         | 39.8(3)         | 0               | 0               | -13.7(3)        |
| O1   | 33(2)           | 51(3)           | 33(2)           | 4(2)            | -1.2(18)        | 13.5(19)        |
| O4   | 33(2)           | 48(2)           | 31(2)           | 0.9(18)         | -4.3(17)        | -8.9(18)        |
| O6   | 46(2)           | 30(2)           | 37(2)           | -7.7(17)        | 0(2)            | -3.3(18)        |
| O8   | 74(3)           | 48(3)           | 41(2)           | -17(2)          | 22(2)           | -19(3)          |
| O10  | 53(3)           | 54(3)           | 58(3)           | 2(2)            | 15(2)           | -18(2)          |
| N1   | 41(3)           | 33(3)           | 25(2)           | 4.6(18)         | 0(2)            | -3(2)           |
| O12  | 73(3)           | 33(2)           | 61(3)           | -20(2)          | -20(3)          | -2(2)           |
| O3   | 41(3)           | 71(3)           | 57(3)           | 17(3)           | 8(2)            | 27(2)           |
| N2   | 56(3)           | 28(3)           | 31(2)           | -8(2)           | -12(2)          | 6(2)            |
| C1   | 40(3)           | 24(2)           | 23(2)           | 4(2)            | -5(2)           | -1(2)           |
| C4   | 42(3)           | 23(2)           | 28(3)           | 6(2)            | -7(2)           | -9(2)           |
| O7   | 101(5)          | 90(4)           | 34(3)           | -6(3)           | 3(3)            | 48(4)           |
| C6   | 47(3)           | 21(2)           | 32(3)           | -4(2)           | -3(2)           | -11(2)          |
| C8   | 39(3)           | 38(4)           | 43(3)           | 5(3)            | -1(3)           | 0(2)            |
| C10  | 55(4)           | 28(3)           | 36(3)           | 1(3)            | -17(3)          | -1(3)           |
| C12  | 54(4)           | 22(3)           | 36(3)           | -3(2)           | -10(3)          | -5(3)           |
| C14  | 58(4)           | 31(3)           | 30(3)           | -6(2)           | -1(3)           | -1(3)           |
| C16  | 47(3)           | 23(3)           | 28(2)           | 1(2)            | -9(2)           | -4(3)           |
| C18  | 37(3)           | 32(3)           | 22(3)           | 5(2)            | -4(2)           | -7(2)           |
| C20  | 42(3)           | 44(3)           | 34(3)           | 5(3)            | -3(3)           | 7(3)            |
| C5   | 48(3)           | 31(3)           | 36(3)           | 8(2)            | -3(3)           | -7(2)           |
| C11  | 61(4)           | 34(3)           | 26(2)           | 0(4)            | -1(2)           | -3(3)           |
| C3   | 46(3)           | 29(3)           | 34(3)           | 2(2)            | -1(3)           | -8(3)           |
| C13  | 49(4)           | 30(3)           | 37(3)           | 8(2)            | -2(3)           | -11(3)          |
| C7   | 64(5)           | 25(3)           | 64(4)           | -11(3)          | -13(4)          | -14(3)          |
| C15  | 50(3)           | 22(3)           | 28(3)           | -1(2)           | -7(2)           | -3(2)           |
| C2   | 70(5)           | 36(3)           | 26(3)           | -10(2)          | -11(3)          | 7(3)            |
| C17  | 105(6)          | 51(4)           | 27(3)           | -8(3)           | -14(4)          | 36(4)           |
| C9   | 51(4)           | 54(5)           | 66(4)           | 33(4)           | -6(3)           | 6(4)            |
| C19  | 53(4)           | 33(3)           | 65(5)           | -2(3)           | -3(4)           | -15(3)          |
| O2   | 67(4)           | 68(4)           | 69(4)           | 2.9(13)         | -0.5(13)        | -1.0(13)        |

Table S3: Bond Lengths for Cd-NDI complex

| Atom | Atom             | Length/Å   | Atom | Atom | Length/Å  |
|------|------------------|------------|------|------|-----------|
| Cd1  | Cd1 <sup>1</sup> | 0.0000(11) | C1   | C4   | 1.408(8)  |
| Cd1  | O4 <sup>1</sup>  | 2.512(4)   | C1   | C6   | 1.373(8)  |
| Cd1  | O4               | 2.512(4)   | C1   | C18  | 1.479(9)  |
| Cd1  | O7               | 2.276(6)   | C4   | C16  | 1.410(8)  |
| Cd1  | O7 <sup>1</sup>  | 2.276(6)   | C4   | C5   | 1.417(9)  |
| Cd1  | C14 <sup>1</sup> | 2.740(7)   | O7   | C14  | 1.244(9)  |
| Cd1  | O2 <sup>1</sup>  | 2.171(10)  | C6   | C3   | 1.403(9)  |
| Cd1  | O2               | 2.171(10)  | C8   | C20  | 1.497(9)  |
| O1   | C20              | 1.327(7)   | C8   | C9   | 1.531(9)  |
| O4   | C14              | 1.242(8)   | C10  | C12  | 1.466(9)  |
| O6   | C18              | 1.221(7)   | C12  | C16  | 1.417(8)  |
| O8   | C11              | 1.220(8)   | C12  | C7   | 1.387(10) |
| O10  | C13              | 1.217(8)   | C14  | C2   | 1.524(10) |
| N1   | C8               | 1.481(8)   | C16  | C15  | 1.417(9)  |
| N1   | C18              | 1.394(8)   | C5   | C13  | 1.458(10) |
| N1   | C13              | 1.405(8)   | C5   | C19  | 1.365(9)  |
| O12  | C10              | 1.217(7)   | C11  | C15  | 1.475(9)  |
| O3   | C20              | 1.209(8)   | C3   | C15  | 1.368(8)  |
| N2   | C10              | 1.387(9)   | C7   | C19  | 1.419(11) |
| N2   | C11              | 1.406(8)   | C2   | C17  | 1.530(10) |
| N2   | C2               | 1.480(8)   |      |      |           |

<sup>1</sup>1-X,-Y,+Z

Table S4: Bond Angles for Cd-NDI complex.

| Atom Atom Atom                        | Angle/°    | Atom Atom Atom          | Angle/°  |
|---------------------------------------|------------|-------------------------|----------|
| Cd1 <sup>1</sup> Cd1 O4               | 0(10)      | C14 O7 Cd1              | 97.9(4)  |
| Cd1 <sup>1</sup> Cd1 O4 <sup>1</sup>  | 0(10)      | C14 O7 Cd1 <sup>1</sup> | 97.9(4)  |
| Cd1 <sup>1</sup> Cd1 O7               | 0(10)      | C1 C6 C3                | 120.5(5) |
| Cd1 <sup>1</sup> Cd1 O7 <sup>1</sup>  | 0(10)      | N1 C8 C20               | 113.4(5) |
| Cd1 <sup>1</sup> Cd1 C14 <sup>1</sup> | 0(10)      | N1 C8 C9                | 110.4(5) |
| Cd1 <sup>1</sup> Cd1 O2 <sup>1</sup>  | 0(10)      | C20 C8 C9               | 112.1(5) |
| Cd1 <sup>1</sup> Cd1 O2               | 0(10)      | O12 C10 N2              | 120.7(6) |
| O4 Cd1 O4 <sup>1</sup>                | 162.06(19) | O12 C10 C12             | 122.5(7) |
| O4 Cd1 C14 <sup>1</sup>               | 170.67(16) | N2 C10 C12              | 116.8(5) |
| O4 <sup>1</sup> Cd1 C14 <sup>1</sup>  | 26.92(16)  | C16 C12 C10             | 120.8(6) |
| O7 Cd1 O4 <sup>1</sup>                | 144.39(17) | C7 C12 C10              | 120.4(6) |
| O7 Cd1 O4                             | 53.52(17)  | C7 C12 C16              | 118.7(6) |
| O7 <sup>1</sup> Cd1 O4                | 144.39(17) | O4 C14 O7               | 121.2(6) |
| O7 <sup>1</sup> Cd1 O4 <sup>1</sup>   | 53.52(17)  | O4 C14 C2               | 121.0(6) |
| O7 <sup>1</sup> Cd1 O7                | 91.1(3)    | O7 C14 C2               | 117.6(6) |
| O7 Cd1 C14 <sup>1</sup>               | 117.77(19) | C4 C16 C12              | 120.6(5) |
| O7 <sup>1</sup> Cd1 C14 <sup>1</sup>  | 26.71(19)  | C4 C16 C15              | 118.7(5) |
| O2 <sup>1</sup> Cd1 O4 <sup>1</sup>   | 86.8(3)    | C15 C16 C12             | 120.7(6) |
| O2 <sup>1</sup> Cd1 O4                | 85.0(3)    | O6 C18 N1               | 120.4(6) |
| O2 Cd1 O4 <sup>1</sup>                | 85.0(3)    | O6 C18 C1               | 122.0(6) |
| O2 Cd1 O4                             | 86.8(3)    | N1 C18 C1               | 117.6(5) |
| O2 <sup>1</sup> Cd1 O7                | 105.9(3)   | O1 C20 C8               | 114.3(5) |
| O2 Cd1 O7 <sup>1</sup>                | 105.9(3)   | O3 C20 O1               | 124.0(6) |
| O2 <sup>1</sup> Cd1 O7 <sup>1</sup>   | 111.5(3)   | O3 C20 C8               | 121.5(6) |
| O2 Cd1 O7                             | 111.5(3)   | C4 C5 C13               | 119.7(5) |
| O2 <sup>1</sup> Cd1 C14 <sup>1</sup>  | 101.6(3)   | C19 C5 C4               | 120.4(7) |
| O2 Cd1 C14 <sup>1</sup>               | 94.5(3)    | C19 C5 C13              | 119.8(6) |
| O2 <sup>1</sup> Cd1 O2                | 125.5(5)   | O8 C11 N2               | 119.2(6) |
| Cd1 <sup>1</sup> O4 Cd1               | 0.00(3)    | O8 C11 C15              | 122.9(6) |
| C14 O4 Cd1 <sup>1</sup>               | 86.8(4)    | N2 C11 C15              | 117.8(5) |
| C14 O4 Cd1                            | 86.8(4)    | C15 C3 C6               | 120.1(6) |
| C18 N1 C8                             | 118.8(5)   | O10 C13 N1              | 119.7(6) |
| C18 N1 C13                            | 124.1(5)   | O10 C13 C5              | 122.5(6) |
| C13 N1 C8                             | 117.0(5)   | N1 C13 C5               | 117.7(5) |
| C10 N2 C11                            | 124.8(5)   | C12 C7 C19              | 120.7(6) |
| C10 N2 C2                             | 117.2(5)   | C16 C15 C11             | 118.9(5) |
| C11 N2 C2                             | 117.9(6)   | C3 C15 C16              | 120.7(6) |
| C4 C1 C18                             | 119.3(5)   | C3 C15 C11              | 120.4(6) |
| C6 C1 C4                              | 120.2(5)   | N2 C2 C14               | 111.9(5) |
| C6 C1 C18                             | 120.4(5)   | N2 C2 C17               | 112.5(5) |

| Atom             | Atom | Atom | Angle/°  | Atom             | Atom | Atom | Angle/°  |
|------------------|------|------|----------|------------------|------|------|----------|
| C1               | C4   | C16  | 119.6(5) | C14              | C2   | C17  | 113.2(7) |
| C1               | C4   | C5   | 121.3(6) | C5               | C19  | C7   | 120.4(7) |
| C16              | C4   | C5   | 119.1(5) | Cd1 <sup>1</sup> | O2   | Cd1  | 0.00(3)  |
| Cd1 <sup>1</sup> | O7   | Cd1  | 0.00(2)  |                  |      |      |          |

<sup>1</sup>1-X,-Y,+Z

Table S5: Hydrogen Bonds for Cd-NDI complex.

| D  | H  | A               | d(D-H)/Å | d(H-A)/Å | d(D-A)/Å | D-H-A/° |
|----|----|-----------------|----------|----------|----------|---------|
| O1 | H1 | O4 <sup>1</sup> | 0.82     | 1.80     | 2.584(6) | 158.2   |

<sup>1</sup>1/2-X,1/2+Y,1-Z

Table S6: Torsion Angles for Cd-NDI complex.

| A                   | B   | C   | D   | Angle/°   | A   | B   | C   | D   | Angle/°   |
|---------------------|-----|-----|-----|-----------|-----|-----|-----|-----|-----------|
| Cd1 <sup>1</sup> O4 | C14 | O7  |     | 6.7(7)    | C8  | N1  | C13 | O10 | -6.4(8)   |
| Cd1                 | O4  | C14 | O7  | 6.7(7)    | C8  | N1  | C13 | C5  | 170.4(5)  |
| Cd1                 | O4  | C14 | C2  | -178.8(6) | C10 | N2  | C11 | O8  | 176.0(6)  |
| Cd1 <sup>1</sup> O4 | C14 | C2  |     | -178.8(6) | C10 | N2  | C11 | C15 | -0.3(8)   |
| Cd1                 | O7  | C14 | O4  | -7.4(8)   | C10 | N2  | C2  | C14 | -115.4(6) |
| Cd1 <sup>1</sup> O7 | C14 | O4  |     | -7.4(8)   | C10 | N2  | C2  | C17 | 115.8(7)  |
| Cd1                 | O7  | C14 | C2  | 177.9(5)  | C10 | C12 | C16 | C4  | 178.2(5)  |
| Cd1 <sup>1</sup> O7 | C14 | C2  |     | 177.9(5)  | C10 | C12 | C16 | C15 | -0.6(8)   |
| O4                  | C14 | C2  | N2  | 22.1(9)   | C10 | C12 | C7  | C19 | 179.2(6)  |
| O4                  | C14 | C2  | C17 | 150.5(6)  | C12 | C16 | C15 | C11 | -3.3(8)   |
| O8                  | C11 | C15 | C16 | -172.4(6) | C12 | C16 | C15 | C3  | 177.3(6)  |
| O8                  | C11 | C15 | C3  | 7.0(9)    | C12 | C7  | C19 | C5  | 3.2(11)   |
| N1                  | C8  | C20 | O1  | 35.9(8)   | C16 | C4  | C5  | C13 | -178.5(5) |
| N1                  | C8  | C20 | O3  | -148.9(6) | C16 | C4  | C5  | C19 | -2.6(9)   |
| O12                 | C10 | C12 | C16 | -176.6(6) | C16 | C12 | C7  | C19 | -3.8(10)  |
| O12                 | C10 | C12 | C7  | 0.3(9)    | C18 | N1  | C8  | C20 | -128.7(6) |
| N2                  | C10 | C12 | C16 | 4.1(8)    | C18 | N1  | C8  | C9  | 104.6(6)  |
| N2                  | C10 | C12 | C7  | -179.0(6) | C18 | N1  | C13 | O10 | 177.7(6)  |
| N2                  | C11 | C15 | C16 | 3.8(8)    | C18 | N1  | C13 | C5  | -5.5(8)   |
| N2                  | C11 | C15 | C3  | -176.8(5) | C18 | C1  | C4  | C16 | 176.2(5)  |
| C1                  | C4  | C16 | C12 | -176.3(5) | C18 | C1  | C4  | C5  | -2.0(8)   |
| C1                  | C4  | C16 | C15 | 2.5(8)    | C18 | C1  | C6  | C3  | -177.9(5) |
| C1                  | C4  | C5  | C13 | -0.3(9)   | C5  | C4  | C16 | C12 | 1.9(8)    |
| C1                  | C4  | C5  | C19 | 175.7(6)  | C5  | C4  | C16 | C15 | -179.2(5) |

| A  | B     | C      | D   | Angle/°   | A     | B         | C      | D | Angle/°   |
|----|-------|--------|-----|-----------|-------|-----------|--------|---|-----------|
| C1 | C6    | C3     | C15 | 0.9(9)    | C11N2 | C10O12    |        |   | 177.1(6)  |
| C4 | C1    | C6     | C3  | 0.1(8)    | C11N2 | C10C12    |        |   | -3.6(8)   |
| C4 | C1    | C18O6  |     | -176.9(5) | C11N2 | C2        | C14    |   | 66.9(7)   |
| C4 | C1    | C18N1  |     | 0.6(7)    | C11N2 | C2        | C17    |   | -61.9(8)  |
| C4 | C16   | C15C11 |     | 177.8(5)  | C13N1 | C8        | C20    |   | 55.2(7)   |
| C4 | C16   | C15C3  |     | -1.5(8)   | C13N1 | C8        | C9     |   | -71.5(6)  |
| C4 | C5    | C13O10 |     | -179.4(6) | C13N1 | C18O6     |        |   | -179.1(5) |
| C4 | C5    | C13N1  |     | 3.9(9)    | C13N1 | C18C1     |        |   | 3.3(8)    |
| C4 | C5    | C19C7  |     | 0.1(10)   | C13C5 | C19C7     |        |   | 176.0(7)  |
| O7 | C14C2 | N2     |     | -163.2(6) | C7    | C12C16C4  |        |   | 1.2(8)    |
| O7 | C14C2 | C17    |     | -34.8(9)  | C7    | C12C16C15 |        |   | -177.6(6) |
| C6 | C1    | C4     | C16 | -1.9(8)   | C2    | N2        | C10O12 |   | -0.4(8)   |
| C6 | C1    | C4     | C5  | 179.9(6)  | C2    | N2        | C10C12 |   | 178.9(5)  |
| C6 | C1    | C18O6  |     | 1.2(8)    | C2    | N2        | C11O8  |   | -6.5(8)   |
| C6 | C1    | C18N1  |     | 178.7(5)  | C2    | N2        | C11C15 |   | 177.2(5)  |
| C6 | C3    | C15C16 |     | -0.2(9)   | C9    | C8        | C20O1  |   | 161.7(6)  |
| C6 | C3    | C15C11 |     | -179.5(5) | C9    | C8        | C20O3  |   | -23.1(9)  |
| C8 | N1    | C18O6  |     | 5.0(8)    | C19C5 | C13O10    |        |   | 4.6(10)   |
| C8 | N1    | C18C1  |     | -172.6(5) | C19C5 | C13N1     |        |   | -172.1(6) |

<sup>11</sup>X<sub>7</sub>-Y<sub>7</sub>+Z

**Table S7: Hydrogen Atom Coordinates (Å×10<sup>4</sup>) and Isotropic Displacement Parameters (Å<sup>2</sup>×10<sup>3</sup>) for Cd-NDI complex.**

| Atom | <i>x</i> | <i>y</i> | <i>z</i> | U(eq) |
|------|----------|----------|----------|-------|
| H1   | 1260.98  | 7399.98  | 7375.42  | 58    |
| H6   | 3078.56  | 9759.08  | 3375.17  | 40    |
| H8   | 1443.84  | 10654.2  | 5400.63  | 48    |
| H3   | 3608.29  | 8047.17  | 2139.21  | 44    |
| H7   | 1731.54  | 1990.65  | 1800.34  | 61    |
| H2   | 3310.32  | 1157.95  | -324.66  | 53    |
| H17A | 3315.77  | 3667.37  | -1516.77 | 92    |
| H17B | 3842.68  | 2530.51  | -1702.01 | 92    |
| H17C | 3859.59  | 4346.56  | -993.95  | 92    |
| H9A  | 944.88   | 10644.42 | 3656.17  | 86    |
| H9B  | 617.31   | 11298.79 | 4718.14  | 86    |
| H9C  | 536.83   | 9312.65  | 4244.01  | 86    |
| H19  | 1237.88  | 3579.13  | 3176.62  | 60    |

| Atom | <i>x</i> | <i>y</i> | <i>z</i> | U(eq) |
|------|----------|----------|----------|-------|
| H2A  | 4489.55  | -3569.2  | 1993.55  | 102   |
| H2B  | 4791.3   | -3059.44 | 2779.3   | 102   |

Table S8: Atomic Occupancy for *Cd-NDI complex*.

| Atom | Occupancy | Atom | Occupancy | Atom | Occupancy |
|------|-----------|------|-----------|------|-----------|
| O2   | 0.64(2)   | H2A  | 0.64(2)   | H2B  | 0.64(2)   |

Table S9: Solvent masks information for *Cd-NDI complex*.

| Number | X     | Y      | Z     | Volume | Electron count | Content |
|--------|-------|--------|-------|--------|----------------|---------|
| 1      | 0.000 | -0.593 | 0.264 | 168.6  | 44.2 4.4       | water   |
| 2      | 0.500 | 0.003  | 0.736 | 168.6  | 44.5 4.4       | water   |

## Experimental

Single crystals of  $C_{40}H_{28.65}CdN_4O_{17.32}$  *Cd-NDI complex* were yellow-redish in color. A suitable crystal was selected and mount on a Bruker APEX-II CCD diffractometer. The crystal was kept at 296.15 K during data collection. Using Olex2 [1], the structure was solved with the Unknown [2] structure solution program using Unknown and refined with the Unknown [3] refinement package using Unknown minimisation.

## Crystal structure determination of *Cd-NDI complex*

**Crystal Data** for  $C_{40}H_{28.645}CdN_4O_{17.32}$  ( $M = 954.83$  g/mol): orthorhombic, space group  $P2_12_12$  (no. 18),  $a = 24.891(2)$  Å,  $b = 7.3061(7)$  Å,  $c = 11.7772(11)$  Å,  $V = 2141.7(3)$  Å<sup>3</sup>,  $Z = 2$ ,  $T = 296.15$  K,  $\mu(\text{MoK}\alpha) = 0.588$  mm<sup>-1</sup>,  $D_{\text{calc}} = 1.481$  g/cm<sup>3</sup>, 21339 reflections measured ( $3.458^\circ \leq 2\theta \leq 50.76^\circ$ ), 3935 unique ( $R_{\text{int}} = 0.0251$ ,  $R_{\text{sigma}} = 0.0206$ ) which were used in all calculations. The final  $R_1$  was 0.0442 ( $I > 2\sigma(I)$ ) and  $wR_2$  was 0.1298 (all data).

## Refinement model description

Number of restraints - 6, number of constraints - unknown.

Details:

1. Uiso/Uanis restraints and constraints

Uanis(O2)  $\approx$  Ueq: with sigma of 0.001 and sigma for terminal atoms of 0.002

2. Others

Sof(O2)=Sof(H13)=Sof(H7)=FVAR(1)

3.a Rotating group:

O2(H13,H7)

3.b Ternary CH refined with riding coordinates:

C8(H6), C2(H12)

3.c Aromatic/amide H refined with riding coordinates:

C6(H4), C3(H8), C7(H10), C19(H3)

3.d Idealised Me refined as rotating group:

C17(H14,H15,H2), C9(H9,H5,H11)

3.e Idealised tetrahedral OH refined as rotating group:

O1(H1)

This report has been created with Olex2, compiled on 2020.11.12 svn.r5f609507 for OlexSys. Please let us know if there are any errors or if you would like to have additional features.

Table S10: All DOS information

| Column1 | Column2    | Column3    | Column4 | Column5 | Column6 | Column7 |
|---------|------------|------------|---------|---------|---------|---------|
| MO      | Energy(eV) | Energy(eV) | Sym. 0  | Sym.1   | Sym. 2  | Sym. 3  |
|         |            |            |         |         |         |         |
| 1       |            | -515.214   | 0       | 100.1   | 0       | -0.1    |
| 2       |            | -515.045   | 100     | 0       | 0       | 0       |
| 3       |            | -514.989   | 0       | 100.1   | 0       | -0.1    |
| 4       |            | -514.88    | 0       | 100.1   | 0       | -0.1    |
| 5       |            | -514.866   | 0       | 100.1   | 0       | -0.1    |
| 6       |            | -514.808   | 100.1   | 0       | -0.1    | 0       |
| 7       |            | -514.773   | 100.1   | 0       | -0.1    | 0       |
| 8       |            | -514.77    | 100.1   | 0       | -0.1    | 0       |
| 9       |            | -514.743   | 1.4     | 98.6    | 0       | 0       |
| 10      |            | -514.741   | 100.1   | 0       | -0.1    | 0       |
| 11      |            | -514.73    | 98.6    | 1.4     | 0       | 0       |
| 12      |            | -513.686   | 0       | 100     | 0       | 0       |
| 13      |            | -513.574   | 100.1   | 0       | -0.1    | 0       |
| 14      |            | -512.762   | 0       | 100.1   | 0       | -0.1    |
| 15      |            | -512.704   | 0.2     | 99.9    | 0       | -0.1    |
| 16      |            | -512.628   | 99.3    | 0.8     | -0.1    | 0       |
| 17      |            | -512.619   | 99.9    | 0.2     | -0.1    | 0       |
| 18      |            | -512.608   | 0.8     | 99.3    | 0       | -0.1    |
| 19      |            | -387.087   | 0       | 100.1   | 0       | -0.1    |
| 20      |            | -386.951   | 0       | 100.1   | 0       | -0.1    |

|    |  |          |       |      |       |       |
|----|--|----------|-------|------|-------|-------|
| 21 |  | -386.897 | 100.1 | 0    | -0.1  | 0     |
| 22 |  | -386.619 | 100.1 | 0    | -0.1  | 0     |
| 23 |  | -276.469 | 0     | -0.1 | 0     | 100.1 |
| 24 |  | -276.445 | 0     | -0.1 | 0     | 100.1 |
| 25 |  | -276.344 | -0.1  | 0    | 100.1 | 0     |
| 26 |  | -276.14  | 0     | -0.1 | 0     | 100.1 |
| 27 |  | -276.055 | 0     | -0.1 | 0     | 100.1 |
| 28 |  | -275.981 | -0.1  | 0    | 100.1 | 0     |
| 29 |  | -275.973 | -0.1  | 0    | 100.1 | 0     |
| 30 |  | -275.955 | -0.1  | 0    | 100.1 | 0     |
| 31 |  | -274.868 | -0.1  | 0    | 100.1 | 0     |
| 32 |  | -274.333 | 0     | -0.1 | 0     | 100.1 |
| 33 |  | -274.32  | -0.1  | 0    | 100.1 | 0     |
| 34 |  | -274.318 | 0     | -0.1 | 0     | 100.1 |
| 35 |  | -274.315 | 0     | 0    | 0     | 100   |
| 36 |  | -274.309 | -0.1  | 0    | 100.1 | 0     |
| 37 |  | -274.286 | 0     | 0    | 0     | 100   |
| 38 |  | -274.205 | 0     | 0    | 0     | 100   |
| 39 |  | -274.199 | 0     | 0    | 100   | 0     |
| 40 |  | -274.176 | 0     | 0    | 100   | 0     |
| 41 |  | -274.158 | 0     | 0    | 0     | 100   |
| 42 |  | -274.148 | 0     | 0    | 0     | 100   |
| 43 |  | -274.145 | 0     | 0    | 0     | 100   |
| 44 |  | -274.133 | 0     | -0.1 | 0     | 100.1 |
| 45 |  | -274.097 | -0.1  | 0    | 95.3  | 4.8   |
| 46 |  | -274.081 | 0     | -0.1 | 4.9   | 95.2  |
| 47 |  | -274.077 | 0     | 0    | 99.9  | 0.1   |
| 48 |  | -274.054 | 0     | 0    | 100   | 0     |
| 49 |  | -274.002 | 0     | 0    | 100   | 0     |
| 50 |  | -273.979 | 0     | 0    | 100   | 0     |
| 51 |  | -273.904 | 0     | -0.1 | 0     | 100.1 |
| 52 |  | -273.897 | 0     | -0.1 | 0     | 100.1 |
| 53 |  | -273.873 | 0     | -0.1 | 0     | 100.1 |
| 54 |  | -273.854 | 0     | -0.1 | 0     | 100.1 |
| 55 |  | -273.825 | -0.1  | 0    | 100.1 | 0     |
| 56 |  | -273.783 | -0.1  | 0    | 100.1 | 0     |
| 57 |  | -273.741 | -0.1  | 0    | 100.1 | 0     |
| 58 |  | -273.716 | -0.1  | 0    | 100.1 | 0     |
| 59 |  | -272.971 | 0     | -0.2 | 0     | 100.2 |
| 60 |  | -272.794 | -0.2  | 0    | 100.2 | 0     |
| 61 |  | -272.746 | 0     | -0.2 | 0     | 100.2 |
| 62 |  | -272.729 | -0.2  | 0    | 100.2 | 0     |
| 63 |  | -28.057  | 0     | 69.1 | 0     | 30.9  |

|     |  |         |      |      |      |      |
|-----|--|---------|------|------|------|------|
| 64  |  | -27.834 | 0    | 68.1 | 0    | 31.9 |
| 65  |  | -27.795 | 67.8 | 0    | 32.2 | 0    |
| 66  |  | -27.779 | 68.1 | 0.1  | 31.8 | 0    |
| 67  |  | -27.617 | 0    | 70.9 | 0    | 29.1 |
| 68  |  | -27.476 | 0    | 71.3 | 0    | 28.7 |
| 69  |  | -27.433 | 72.4 | 0    | 27.6 | 0    |
| 70  |  | -27.393 | 71.2 | 0.1  | 28.7 | 0    |
| 71  |  | -27.346 | 73.1 | 0    | 26.9 | 0    |
| 72  |  | -26.633 | 0    | 72.5 | 0    | 27.5 |
| 73  |  | -26.359 | 19.2 | 48.8 | 10.5 | 21.6 |
| 74  |  | -26.286 | 48.5 | 19.5 | 22.9 | 9.1  |
| 75  |  | -25.992 | 5.6  | 91.3 | 1.1  | 2    |
| 76  |  | -25.922 | 82.6 | 14.9 | 2.4  | 0.1  |
| 77  |  | -25.53  | 82.3 | 0    | 17.7 | 0    |
| 78  |  | -24.732 | 0    | 81.2 | 0    | 18.8 |
| 79  |  | -24.442 | 0    | 59.1 | 0    | 40.9 |
| 80  |  | -24.286 | 0.1  | 64.3 | 0.1  | 35.5 |
| 81  |  | -24.261 | 54.9 | 0.2  | 44.9 | 0    |
| 82  |  | -24.134 | 65.8 | 0    | 34.1 | 0    |
| 83  |  | -23.782 | 0.4  | 36.8 | 0.6  | 62.2 |
| 84  |  | -23.72  | 64.6 | 0.6  | 33.3 | 1.5  |
| 85  |  | -23.674 | 0.9  | 60.6 | 1.5  | 37   |
| 86  |  | -23.599 | 33.3 | 0.1  | 66.6 | 0    |
| 87  |  | -22.453 | 0    | 5.4  | 0    | 94.6 |
| 88  |  | -22.343 | 5.3  | 0    | 94.7 | 0    |
| 89  |  | -21.63  | 0    | 8.4  | 0    | 91.6 |
| 90  |  | -21.522 | 8.2  | 0    | 91.8 | 0    |
| 91  |  | -20.34  | 0    | 11.2 | 0    | 88.8 |
| 92  |  | -20.244 | 12   | 0    | 88   | 0    |
| 93  |  | -20.186 | 0    | 8    | 0    | 92   |
| 94  |  | -20.059 | 7.5  | 0    | 92.5 | 0    |
| 95  |  | -19.982 | 0    | 21.4 | 0    | 78.5 |
| 96  |  | -19.905 | 20.7 | 0    | 79.3 | 0    |
| 97  |  | -19.736 | 0.1  | 25.2 | 0.3  | 74.5 |
| 98  |  | -19.671 | 25.2 | 0.1  | 74.6 | 0.2  |
| 99  |  | -18.086 | 0    | 18.7 | 0    | 81.2 |
| 100 |  | -17.928 | 17.6 | 0    | 82.3 | 0    |
| 101 |  | -17.785 | 0    | 22.5 | 0.1  | 77.5 |
| 102 |  | -17.673 | 22.6 | 0    | 77.4 | 0    |
| 103 |  | -17.07  | 0.1  | 26.2 | 2.8  | 71   |
| 104 |  | -17.03  | 27.8 | 0.1  | 72   | 0.1  |
| 105 |  | -16.767 | 0.3  | 14.1 | 34.9 | 50.8 |
| 106 |  | -16.731 | 2.7  | 14.9 | 56.5 | 25.9 |

|     |  |         |      |      |      |      |
|-----|--|---------|------|------|------|------|
| 107 |  | -16.719 | 2    | 20   | 45.1 | 32.9 |
| 108 |  | -16.682 | 0.5  | 12.5 | 51.3 | 35.7 |
| 109 |  | -16.651 | 2.8  | 1.7  | 93.6 | 2    |
| 110 |  | -16.624 | 14.2 | 0.7  | 84   | 1.1  |
| 111 |  | -16.588 | 2.8  | 1    | 94.9 | 1.3  |
| 112 |  | -16.551 | 2.9  | 0.3  | 96.5 | 0.2  |
| 113 |  | -16.526 | 33.7 | 0.1  | 66.2 | 0    |
| 114 |  | -16.158 | 1.7  | 23.7 | 8.7  | 65.8 |
| 115 |  | -16.128 | 22.2 | 1.9  | 71   | 4.9  |
| 116 |  | -16.054 | 0.1  | 30.7 | 1.8  | 67.4 |
| 117 |  | -15.901 | 31.6 | 0.1  | 68.4 | 0    |
| 118 |  | -14.769 | 0    | 28.9 | 0.1  | 71   |
| 119 |  | -14.588 | 24.6 | 0    | 75.3 | 0    |
| 120 |  | -14.568 | 0.1  | 23.8 | 0.7  | 75.4 |
| 121 |  | -14.468 | 25.2 | 0.2  | 74.5 | 0.1  |
| 122 |  | -14.015 | 0    | 30.7 | 0.2  | 69.1 |
| 123 |  | -13.937 | 32.5 | 0.2  | 67.2 | 0.1  |
| 124 |  | -13.704 | 0.5  | 20.7 | 1.1  | 77.7 |
| 125 |  | -13.664 | 31.4 | 0.6  | 66.9 | 1.1  |
| 126 |  | -13.48  | 1.1  | 62.1 | 1    | 35.7 |
| 127 |  | -13.409 | 50.6 | 0.9  | 48.3 | 0.3  |
| 128 |  | -13.24  | 52.7 | 11.5 | 31.3 | 4.5  |
| 129 |  | -13.174 | 5.7  | 49.4 | 3.1  | 41.9 |
| 130 |  | -12.945 | 1.5  | 46.8 | 2    | 49.7 |
| 131 |  | -12.894 | 38.6 | 4.5  | 55.3 | 1.6  |
| 132 |  | -12.611 | 0.1  | 32.9 | 0.1  | 66.9 |
| 133 |  | -12.533 | 1    | 37.1 | 2.9  | 59   |
| 134 |  | -12.507 | 35.2 | 2.2  | 61   | 1.6  |
| 135 |  | -12.499 | 34.8 | 0.5  | 64.3 | 0.4  |
| 136 |  | -12.207 | 16.3 | 0.6  | 82.5 | 0.5  |
| 137 |  | -12.165 | 0.2  | 24.3 | 0.7  | 74.8 |
| 138 |  | -11.814 | 0.1  | 39.3 | 0.2  | 60.5 |
| 139 |  | -11.752 | 40.5 | 0.2  | 59.3 | 0.1  |
| 140 |  | -11.697 | 0.4  | 34.6 | 0.9  | 64.1 |
| 141 |  | -11.674 | 33.8 | 1.2  | 64.2 | 0.9  |
| 142 |  | -11.492 | 0    | 25.7 | 0.2  | 74   |
| 143 |  | -11.373 | 24.5 | 0.3  | 75.2 | 0.1  |
| 144 |  | -11.36  | 0    | 16.8 | 0.1  | 83.1 |
| 145 |  | -11.25  | 3.2  | 32.9 | 15.2 | 48.8 |
| 146 |  | -11.246 | 13.2 | 7.6  | 68.2 | 11   |
| 147 |  | -11.162 | 39.6 | 0.2  | 60.1 | 0    |
| 148 |  | -10.88  | 0.7  | 55.7 | 1.5  | 42.1 |
| 149 |  | -10.808 | 0.5  | 33.7 | 0.7  | 65.1 |

|     |  |         |      |      |      |      |
|-----|--|---------|------|------|------|------|
| 150 |  | -10.749 | 39.2 | 1.6  | 58   | 1.3  |
| 151 |  | -10.659 | 42   | 3    | 53.9 | 1    |
| 152 |  | -10.64  | 0.6  | 30.8 | 1.2  | 67.5 |
| 153 |  | -10.54  | 29.4 | 6.7  | 57   | 6.8  |
| 154 |  | -10.511 | 9.1  | 41.7 | 16.8 | 32.4 |
| 155 |  | -10.497 | 9.9  | 23.7 | 22.3 | 44.1 |
| 156 |  | -10.479 | 23   | 14.5 | 38.9 | 23.7 |
| 157 |  | -10.396 | 36.9 | 3.1  | 57.8 | 2.2  |
| 158 |  | -10.359 | 1.1  | 47.8 | 1.5  | 49.7 |
| 159 |  | -10.27  | 18.7 | 36   | 11.8 | 33.5 |
| 160 |  | -10.212 | 42.9 | 22.2 | 21.7 | 13.2 |
| 161 |  | -10.052 | 50   | 0.9  | 48.8 | 0.3  |
| 162 |  | -9.964  | 0.1  | 53.4 | 0.1  | 46.5 |
| 163 |  | -9.89   | 5.3  | 38.3 | 4.1  | 52.4 |
| 164 |  | -9.829  | 46.3 | 6.9  | 35.8 | 10.9 |
| 165 |  | -9.787  | 13.6 | 24.5 | 19.4 | 42.6 |
| 166 |  | -9.773  | 31.4 | 6.7  | 49.5 | 12.4 |
| 167 |  | -9.729  | 5.5  | 43.5 | 9.3  | 41.7 |
| 168 |  | -9.711  | 30.4 | 6.4  | 54.4 | 8.8  |
| 169 |  | -9.688  | 42.8 | 2.7  | 52.4 | 2.2  |
| 170 |  | -9.649  | 1.5  | 42.2 | 2.3  | 54   |
| 171 |  | -9.534  | 38   | 16   | 28.9 | 17.1 |
| 172 |  | -9.513  | 18.7 | 30.6 | 14.1 | 36.7 |
| 173 |  | -9.472  | 43.8 | 1.2  | 53.6 | 1.4  |
| 174 |  | -9.334  | 41.8 | 7.5  | 44.6 | 6.1  |
| 175 |  | -9.301  | 13.1 | 31.7 | 19.4 | 35.8 |
| 176 |  | -9.273  | 0.4  | 40.9 | 0.4  | 58.3 |
| 177 |  | -9.232  | 22.8 | 27.9 | 26.4 | 22.9 |
| 178 |  | -9.148  | 19.1 | 24.1 | 28.9 | 27.9 |
| 179 |  | -9.112  | 16.4 | 24.5 | 22.5 | 36.6 |
| 180 |  | -9.01   | 41.8 | 3.8  | 50.7 | 3.7  |
| 181 |  | -8.928  | 4.3  | 43.3 | 4.4  | 48   |
| 182 |  | -8.891  | 38.5 | 11.8 | 34.3 | 15.4 |
| 183 |  | -8.834  | 23.4 | 22.7 | 31.7 | 22.2 |
| 184 |  | -8.766  | 30.1 | 15.9 | 38.9 | 15.1 |
| 185 |  | -8.625  | 71.6 | 0.8  | 27   | 0.6  |
| 186 |  | -8.486  | 34.9 | 23.2 | 29.6 | 12.3 |
| 187 |  | -8.372  | 54.9 | 0.1  | 45   | 0    |
| 188 |  | -8.189  | 3.7  | 48.3 | 2.5  | 45.5 |
| 189 |  | -8.132  | 7.1  | 54.3 | 6.1  | 32.5 |
| 190 |  | -8.065  | 16   | 38.8 | 21.9 | 23.2 |
| 191 |  | -8.029  | 11.4 | 37.6 | 17   | 34   |
| 192 |  | -8.005  | 22.7 | 38.7 | 16.1 | 22.5 |

|     |             |                       |            |                |              |              |
|-----|-------------|-----------------------|------------|----------------|--------------|--------------|
| 193 |             | -7.906                | 30.1       | 16.5           | 42.7         | 10.7         |
| 194 |             | -7.748                | 14.1       | 42.5           | 9.8          | 33.6         |
| 195 |             | -7.624                | 47.2       | 19.4           | 29.3         | 4.1          |
| 196 |             | -7.378                | 77.1       | 0              | 22.8         | 0            |
| 197 |             | -7.207                | 0.5        | 21.4           | 0.8          | 77.3         |
| 198 |             | -7.15                 | 0.1        | 78.8           | 0.4          | 20.7         |
| 199 |             | -7.082                | 21.6       | 1.2            | 76.5         | 0.8          |
| 200 |             | -6.51                 | 0          | 0.3            | 0            | 99.6         |
| 201 |             | -6.404                | 0.5        | 0              | 99.5         | 0            |
| 202 |             | -6.112                | 23.4       | 53.4           | 18           | 5.1          |
| 203 |             | -5.717                | 88         | 0.8            | 11           | 0.1          |
| 204 |             | -5.71                 | 0.8        | 89.9           | 0.1          | 9.2          |
| 205 |             | -5.617                | 24.6       | 60.7           | 3.6          | 11.1         |
| 206 |             | -5.578                | 18.2       | 69.9           | 2.2          | 9.7          |
| 207 |             | -5.553                | 76.7       | 6.3            | 13.4         | 3.6          |
| 208 | -19         | -5.495                | 25.8       | 26.1           | 6.1          | 42           |
| 209 | -18         | -5.444                | 20.7       | 44.2           | 9.6          | 25.5         |
| 210 | -17         | -5.401                | 69.7       | 16.6           | 10.3         | 3.3          |
| 211 | -16         | -5.358                | 46.1       | 3.3            | 50.4         | 0.2          |
| 212 | -15         | -5.342                | 0.4        | 88.4           | 0.2          | 11           |
| 213 | -14         | -5.317                | 78.4       | 0.7            | 20.8         | 0            |
| 214 | -13         | -5.127                | 0.2        | 91.4           | 0            | 8.5          |
| 215 | -12         | -5.049                | 90.8       | 1.2            | 7.9          | 0.1          |
| 216 | -11         | -4.959                | 0.1        | 92.9           | 0            | 7.1          |
| 217 | -10         | -4.935                | 93.6       | 0.6            | 5.8          | 0.1          |
| 218 | -9          | -4.918                | 95.4       | 0.4            | 4.2          | 0            |
| 219 | -8          | -4.861                | 30         | 49.1           | 16.2         | 4.7          |
| 220 | -7          | -4.181                | 40.6       | 36.3           | 16.1         | 6.9          |
| 221 | -6          | -4.109                | 0          | 98.7           | 0            | 1.3          |
| 222 | -5          | -3.995                | 89         | 0              | 11           | 0            |
| 223 | -4          | -3.508                | 52.2       | 47.1           | 0.6          | 0.1          |
| 224 | -3          | -3.485                | 47         | 52.8           | 0.2          | 0            |
| 225 | -2          | -3.429                | 0          | 87.7           | 0            | 12.3         |
| 226 | -1          | -3.304                | 53.6       | 45.3           | 0.9          | 0.2          |
| 227 | 0           | -3.207                | 45.9       | 53             | 1            | 0.2          |
| --- | <b>HOMO</b> | <b>- LUMO gap ---</b> | <b>1.6</b> | <b>56 eV -</b> | <b>-----</b> | <b>-----</b> |
| 228 | 0           | -1.551                | 0          | 28.3           | 0            | 71.6         |
| 229 | 1           | -1.392                | 27.6       | 0              | 72.3         | 0            |
| 230 | 2           | 0.362                 | 0          | 29.9           | 0.2          | 69.8         |
| 231 | 3           | 0.485                 | 29.2       | 0              | 70.7         | 0            |
| 232 | 4           | 0.722                 | 0          | 20.6           | 0.1          | 79.3         |
| 233 | 5           | 0.725                 | 0          | 14.3           | 0.1          | 85.7         |
| 234 | 6           | 0.825                 | 0.7        | 0              | 99.3         | 0            |

|     |    |       |      |      |      |      |
|-----|----|-------|------|------|------|------|
| 235 | 7  | 0.881 | 35.2 | 0.1  | 64.7 | 0    |
| 236 | 8  | 2.04  | 0.2  | 32.1 | 1.7  | 66   |
| 237 | 9  | 2.199 | 37.9 | 0.3  | 61.8 | 0.1  |
| 238 | 10 | 2.327 | 6.1  | 25.2 | 18.3 | 50.4 |
| 239 | 11 | 2.401 | 15.3 | 17.1 | 47.6 | 20.1 |
| 240 | 12 | 2.46  | 22.7 | 8.4  | 65.2 | 3.7  |
| 241 | 13 | 2.826 | 50.1 | 0    | 49.9 | 0    |
| 242 | 14 | 3.022 | 14.5 | 16.6 | 50.4 | 18.6 |
| 243 | 15 | 3.241 | 0    | 50.3 | 0    | 49.7 |
| 244 | 16 | 3.32  | 18.8 | 17.7 | 45.7 | 17.8 |
| 245 | 17 | 4.018 | 9.1  | 23.2 | 49.3 | 18.4 |
| 246 | 18 | 4.186 | 10.5 | 8    | 25.4 | 56.1 |
| 247 | 19 | 4.28  | 7.9  | 11.9 | 37.4 | 42.8 |
| 248 |    | 4.379 | 6.5  | 3.3  | 79.3 | 10.8 |
| 249 |    | 4.436 | 2.3  | 19.6 | 14.5 | 63.6 |
| 250 |    | 4.538 | 23.2 | 4.3  | 70.3 | 2.2  |
| 251 |    | 5.916 | 0    | 29.5 | 0    | 70.5 |
| 252 |    | 5.919 | 30.2 | 0    | 69.8 | 0    |
| 253 |    | 6.123 | 0.3  | 29.1 | 1.7  | 68.9 |
| 254 |    | 6.257 | 24.9 | 3.4  | 70.3 | 1.5  |
| 255 |    | 6.474 | 14.8 | 15.3 | 63.1 | 6.7  |
| 256 |    | 6.977 | 0    | 3.8  | 0.1  | 96.2 |
| 257 |    | 7.079 | 3.8  | 0.1  | 95.8 | 0.2  |
| 258 |    | 7.205 | 2.7  | 19.7 | 9.6  | 68   |
| 259 |    | 7.243 | 21.3 | 3    | 67.4 | 8.3  |
| 260 |    | 7.593 | 30.3 | 0.4  | 69   | 0.3  |
| 261 |    | 7.691 | 0.1  | 25.1 | 0.2  | 74.7 |
| 262 |    | 7.899 | 35   | 0.4  | 64.2 | 0.4  |
| 263 |    | 7.92  | 0    | 43.1 | 0    | 56.9 |
| 264 |    | 8.075 | 1.2  | 40.4 | 2.9  | 55.5 |
| 265 |    | 8.117 | 55.2 | 0.5  | 43.8 | 0.5  |
| 266 |    | 8.234 | 45.8 | 0.4  | 53.1 | 0.7  |
| 267 |    | 8.362 | 0    | 16.1 | 0.1  | 83.8 |
| 268 |    | 8.492 | 14.9 | 0.4  | 83.5 | 1.1  |
| 269 |    | 8.505 | 0.3  | 25.1 | 1.7  | 72.9 |
| 270 |    | 8.637 | 54.3 | 0.1  | 45.4 | 0.2  |
| 271 |    | 8.705 | 0.1  | 41.2 | 0.1  | 58.6 |
| 272 |    | 8.748 | 0    | 33.3 | 0.1  | 66.6 |
| 273 |    | 8.783 | 39.5 | 0    | 60.4 | 0    |
| 274 |    | 8.878 | 35.8 | 0.2  | 63.9 | 0.1  |
| 275 |    | 9.413 | 24.1 | 6.5  | 61.3 | 8.1  |
| 276 |    | 9.439 | 4.6  | 35.3 | 4.5  | 55.7 |
| 277 |    | 9.579 | 0.1  | 48.7 | 0.3  | 50.9 |

|     |  |        |      |      |      |      |
|-----|--|--------|------|------|------|------|
| 278 |  | 9.939  | 0.3  | 20.7 | 0.4  | 78.7 |
| 279 |  | 9.983  | 17.8 | 2.3  | 79.6 | 0.3  |
| 280 |  | 10.11  | 15.7 | 40.2 | 28.7 | 15.5 |
| 281 |  | 10.194 | 13.9 | 2.3  | 83.4 | 0.4  |
| 282 |  | 10.267 | 9.1  | 26.4 | 28.1 | 36.4 |
| 283 |  | 10.335 | 4.8  | 12.6 | 38.4 | 44.2 |
| 284 |  | 10.39  | 3    | 15   | 7.8  | 74.2 |
| 285 |  | 10.438 | 14.4 | 42.9 | 22.5 | 20.1 |
| 286 |  | 10.453 | 19.1 | 19.4 | 24.2 | 37.3 |
| 287 |  | 10.519 | 20   | 6.4  | 31.7 | 41.9 |
| 288 |  | 10.557 | 14.7 | 11.6 | 27.5 | 46.2 |
| 289 |  | 10.626 | 7.9  | 0.8  | 90.1 | 1.1  |
| 290 |  | 10.693 | 18.7 | 13   | 42.2 | 26   |
| 291 |  | 10.785 | 2.4  | 32.2 | 4.6  | 60.9 |
| 292 |  | 10.949 | 32.7 | 9.2  | 37.6 | 20.6 |
| 293 |  | 11.031 | 15.1 | 17   | 38.2 | 29.7 |
| 294 |  | 11.135 | 26   | 11.7 | 46.6 | 15.8 |
| 295 |  | 11.268 | 1.8  | 49   | 2.2  | 47   |
| 296 |  | 11.284 | 12.1 | 34.3 | 14.4 | 39.2 |
| 297 |  | 11.351 | 32.9 | 11.3 | 43.5 | 12.2 |
| 298 |  | 11.571 | 0.2  | 40.9 | 0.5  | 58.3 |
| 299 |  | 11.704 | 42.3 | 0.1  | 57.5 | 0.1  |
| 300 |  | 11.814 | 28.6 | 0.2  | 71.1 | 0.1  |
| 301 |  | 11.949 | 0    | 38.8 | 0    | 61.1 |
| 302 |  | 12.066 | 40.9 | 0.1  | 59   | 0.1  |
| 303 |  | 12.229 | 1.7  | 54   | 1.7  | 42.7 |
| 304 |  | 12.364 | 59.6 | 2.8  | 35.3 | 2.2  |
| 305 |  | 12.509 | 7.1  | 39.7 | 7.3  | 46   |
| 306 |  | 12.567 | 1.4  | 53.3 | 1.3  | 44.1 |
| 307 |  | 12.594 | 14.3 | 34.6 | 13.1 | 38   |
| 308 |  | 12.629 | 29.8 | 18.7 | 30.8 | 20.8 |
| 309 |  | 12.649 | 51.9 | 1.3  | 45.3 | 1.6  |
| 310 |  | 12.822 | 48.6 | 7.8  | 37.5 | 6.2  |
| 311 |  | 12.854 | 8.2  | 48.5 | 6.7  | 36.6 |
| 312 |  | 12.955 | 0    | 42.1 | 0    | 57.8 |
| 313 |  | 12.982 | 43.8 | 0    | 56.1 | 0    |
| 314 |  | 13.148 | 36.9 | 0    | 63   | 0.1  |
| 315 |  | 13.215 | 0.2  | 36.6 | 0.5  | 62.6 |
| 316 |  | 13.275 | 39.3 | 0.3  | 60.1 | 0.3  |
| 317 |  | 13.535 | 0    | 32.1 | 0    | 67.9 |
| 318 |  | 13.764 | 29.6 | 0.1  | 70.3 | 0.1  |
| 319 |  | 13.899 | 0.4  | 38.5 | 0.7  | 60.5 |
| 320 |  | 13.912 | 0.4  | 35.5 | 0.8  | 63.3 |

|     |  |        |      |      |      |      |
|-----|--|--------|------|------|------|------|
| 321 |  | 14.068 | 26.7 | 3.2  | 64.2 | 5.9  |
| 322 |  | 14.229 | 5    | 17.6 | 10.8 | 66.7 |
| 323 |  | 14.258 | 13.4 | 11.1 | 48   | 27.5 |
| 324 |  | 14.27  | 15   | 6.7  | 64.7 | 13.6 |
| 325 |  | 14.376 | 0.4  | 32.3 | 1.1  | 66.2 |
| 326 |  | 14.439 | 26.9 | 0.4  | 71.8 | 0.8  |
| 327 |  | 14.698 | 19.3 | 19.8 | 31.6 | 29.2 |
| 328 |  | 15.174 | 0    | 23.7 | 0    | 76.3 |
| 329 |  | 15.513 | 2.3  | 18.4 | 6.5  | 72.7 |
| 330 |  | 15.532 | 23.5 | 1.8  | 67.7 | 7    |
| 331 |  | 15.736 | 19.4 | 0    | 80.4 | 0.1  |
| 332 |  | 15.879 | 30.6 | 0    | 69.3 | 0.1  |
| 333 |  | 15.89  | 0    | 29.5 | 0    | 70.4 |
| 334 |  | 16.1   | 9.6  | 21.5 | 23.2 | 45.7 |
| 335 |  | 16.117 | 20.5 | 10.7 | 46.9 | 21.9 |
| 336 |  | 17.098 | 36   | 0.4  | 62.8 | 0.7  |
| 337 |  | 17.174 | 15.4 | 20.6 | 27.1 | 37   |
| 338 |  | 17.259 | 21.4 | 14.6 | 37.6 | 26.3 |
| 339 |  | 17.437 | 0    | 29.1 | 0    | 70.9 |
| 340 |  | 17.48  | 0    | 20   | 0    | 79.9 |
| 341 |  | 17.564 | 9.2  | 0    | 90.8 | 0    |
| 342 |  | 18.13  | 0    | 9    | 0    | 91   |
| 343 |  | 18.241 | 8.6  | 0    | 91.4 | 0    |
| 344 |  | 18.288 | 0    | 22.2 | 0.1  | 77.7 |
| 345 |  | 18.369 | 21.2 | 0    | 78.8 | 0    |
| 346 |  | 20.32  | 0    | 4.4  | 0    | 95.6 |
| 347 |  | 20.396 | 4.3  | 0    | 95.7 | 0    |
| 348 |  | 20.571 | 0    | 6.1  | 0    | 93.9 |
| 349 |  | 20.677 | 6    | 0    | 94   | 0    |

Table S11: Electronic transition of Cd-NDI complex through CAM-CAM-B3LYP/LANL2DZ.

| Transition                                        | Energy J/mol | Translation                                       | Energy J/mol |
|---------------------------------------------------|--------------|---------------------------------------------------|--------------|
| $\sigma$ O4-C21 $\rightarrow$ $n^*(6)$ Cd1        | 0.57         | $\pi$ O53-C75 $\rightarrow$ $\pi^*$ C71-C89       | 4.83         |
| $\sigma$ O4-C21 $\rightarrow$ $n^*(7)$ Cd1        | 1.08         | $\sigma$ C43-H44 $\rightarrow$ $\sigma^*$ C13-C25 | 2.06         |
| $\sigma$ C15-H16 $\rightarrow$ $\sigma^*$ C27-C32 | 7.7          | $\sigma$ C15-H16 $\rightarrow$ $\sigma^*$ C12-C13 | 6.62         |
| $\pi$ C25-C43 $\rightarrow$ $\pi^*$ C20-C30       | 9.03         | $\sigma$ C30-H31 $\rightarrow$ $\sigma^*$ C20-C22 | 6.59         |
| $\pi$ C12-C15 $\rightarrow$ $\pi^*$ C27-C32       | 8.98         | $\sigma$ C15-H16 $\rightarrow$ $\sigma^*$ C20-C22 | 6.59         |
| $\pi$ C27-C32 $\rightarrow$ $\pi^*$ O6-C26        | 7.5          | $\sigma$ C27-H28 $\rightarrow$ $\sigma^*$ C22-C32 | 6.53         |
| $\pi$ C25-C43 $\rightarrow$ $\pi^*$ O7-C29        | 5.07         | $\sigma$ C35-H37 $\rightarrow$ $\sigma^*$ N11-C33 | 6.07         |
| $\pi$ O52-C72 $\rightarrow$ $\pi^*$ C73-C78       | 4.98         | $\sigma$ C39-H41 $\rightarrow$ $\sigma^*$ N8-C17  | 6.07         |
| $\pi$ O9-C19 $\rightarrow$ $\pi^*$ C20-C30        | 4.97         | $\sigma$ C33-H34 $\rightarrow$ $\sigma^*$ N11-C26 | 5.79         |
| $\pi$ O7-C29 $\rightarrow$ $\pi^*$ C25-C43        | 4.95         | $\sigma$ C17-H18 $\rightarrow$ $\sigma^*$ N8-C29  | 5.57         |
| $\pi$ O51-C69 $\rightarrow$ $\pi^*$ C58-C61       | 4.94         |                                                   |              |
| $\pi$ O5-C23 $\rightarrow$ $\pi^*$ C12-C15        | 4.86         |                                                   |              |

Table S12: Electronic transition of Cd-NDI complex through B3LYP/LANL2MB.

| Transitions                                      | Energy (J/mol) | Transitions                                      | Energy (J/mol) |
|--------------------------------------------------|----------------|--------------------------------------------------|----------------|
| $\sigma$ N11-C33 $\rightarrow$ n*(9) Cd1         | 0.07           | $\sigma$ O6-C26 $\rightarrow$ $\sigma^*$ N11-C26 | 1.91           |
| $\sigma$ O14-C21 $\rightarrow$ n*(6) Cd1         | 1.05           | $\sigma$ O6-C26 $\rightarrow$ $\sigma^*$ C22-C32 | 0.66           |
| $\sigma$ C35-H37 $\rightarrow$ n*(7) Cd1         | 0.13           | $\sigma$ O6-C26 $\rightarrow$ $\sigma^*$ C26-C32 | 1.2            |
| $\sigma$ C35-H38 $\rightarrow$ n*(7) Cd1         | 0.15           | $\pi$ O6-C26 $\rightarrow$ $\pi^*$ O6-C26        | 2.98           |
| $\sigma$ O2-H3 $\rightarrow$ $\sigma^*$ O2-C24   | 0.77           | $\pi$ O6-C26 $\rightarrow$ $\pi^*$ C27-C32       | 4.79           |
| $\sigma$ O2-H3 $\rightarrow$ $\sigma^*$ O10-C24  | 3.79           | $\sigma$ O7-C29 $\rightarrow$ $\sigma^*$ N8-C23  | 0.73           |
| $\sigma$ O2-H3 $\rightarrow$ $\sigma^*$ C17-C24  | 2.48           | $\sigma$ O7-C29 $\rightarrow$ $\sigma^*$ N8-C29  | 1.95           |
| $\sigma$ O2-C24 $\rightarrow$ $\sigma^*$ N8-C17  | 0.66           | $\sigma$ O7-C29 $\rightarrow$ $\sigma^*$ C13-C25 | 0.66           |
| $\sigma$ O2-C24 $\rightarrow$ $\sigma^*$ O10-C24 | 2.71           | $\sigma$ O7-C29 $\rightarrow$ $\sigma^*$ C25-C29 | 1.24           |
| $\sigma$ O2-C24 $\rightarrow$ $\sigma^*$ C17-C24 | 2.99           | $\pi$ O7-C29 $\rightarrow$ $\pi^*$ O7-C29        | 0.69           |
| $\sigma$ O2-C24 $\rightarrow$ $\sigma^*$ C17-C39 | 0.52           | $\pi$ O7-C29 $\rightarrow$ $\pi^*$ C25-C43       | 5.91           |
| $\sigma$ O4-C21 $\rightarrow$ $\sigma^*$ O14-C21 | 2.13           | $\sigma$ N8-C17 $\rightarrow$ $\sigma^*$ O2-H3   | 0.73           |
| $\sigma$ O4-C21 $\rightarrow$ $\sigma^*$ C21-C33 | 1.9            | $\sigma$ N8-C17 $\rightarrow$ $\sigma^*$ O2-C24  | 0.73           |
| $\sigma$ O5-C23 $\rightarrow$ $\sigma^*$ N8-C23  | 1.93           | $\sigma$ N8-C17 $\rightarrow$ $\sigma^*$ O5-C23  | 1.62           |
| $\sigma$ O5-C23 $\rightarrow$ $\sigma^*$ N8-C29  | 0.73           | $\sigma$ N8-C17 $\rightarrow$ $\sigma^*$ O7-C29  | 1.56           |
| $\sigma$ O5-C23 $\rightarrow$ $\sigma^*$ C12-C13 | 0.65           | $\sigma$ N8-C17 $\rightarrow$ $\sigma^*$ N8-C23  | 2.27           |
| $\sigma$ O5-C23 $\rightarrow$ $\sigma^*$ C12-C23 | 1.25           |                                                  |                |
| $\sigma$ O6-C26 $\rightarrow$ $\sigma^*$ N11-C19 | 0.76           |                                                  |                |

Table S13: Comparison on NLO properties of present work with already reported work.

| Complex                                  | Method            | $\alpha_{\text{iso}}$ (A.U.)/<br>$\times 10^{-22}$ esu | Averages second<br>harmonic<br>generation $\beta(-2w;w,w)a(a.u.)$ /<br>$\times 10^{-30}$ esu | Second order<br>hyperpolarizability<br>or SHG or $\gamma$ (A.U.)/<br>esu $\times 10^{-36}$ | References   |
|------------------------------------------|-------------------|--------------------------------------------------------|----------------------------------------------------------------------------------------------|--------------------------------------------------------------------------------------------|--------------|
| Cd-NDI                                   | CAM-B3LYP/LANL2DZ | 705/1.04                                               | 7967/68.8                                                                                    | 1000000000/5036.7                                                                          | Present work |
| Cd-NDI                                   | B3LYP/LANL2MB     | 465/0.7                                                | 78964/682.1                                                                                  | 363564000/1831.1                                                                           | Present work |
| H <sub>2</sub> -L-ala NDI                | CAM-B3LYP/LANL2DZ | 504/0.7                                                | 2000/17.2                                                                                    | 16993000/85.6                                                                              | Present work |
| KDP                                      | CAM-B3LYP/LANL2DZ | 41.8249/0.06                                           | 2766/23.9                                                                                    | 1363640/6.9                                                                                | Present work |
| Urea                                     | CAM-B3LYP/LANL2DZ | 26/0.004                                               | 10/0.009                                                                                     | 1858/0.01                                                                                  | Present work |
| NDI derivative                           | CAM-B3LYP         | 1141.0/1.7                                             | NA                                                                                           | 188215.6/ 0.9                                                                              | [1]          |
| NDI-COR                                  | CAM-B3LYP         | 913.4/1.4                                              | NA                                                                                           | 274907.7/1.4                                                                               | [1]          |
| NDI-2COR                                 | CAM-B3LYP         | 728.6/1.1                                              | NA                                                                                           | 392069.9/2.0                                                                               | [1]          |
| [Os(CO) <sub>3</sub> Cl <sub>2</sub> L1] | experimental      | NA                                                     | 43 esu                                                                                       | NA                                                                                         | [2]          |
| ZnTFP-L2                                 | experimental      | NA                                                     | 2.42 esu                                                                                     | NA                                                                                         | [3]          |
| ZnTPP-L2                                 | experimental      | NA                                                     | 0.74 esu                                                                                     | NA                                                                                         | [3]          |
| ZnTBP-L2                                 | experimental      | NA                                                     | 2.34 esu                                                                                     | NA                                                                                         | [3]          |
| ZnTNP-L2                                 | experimental      | NA                                                     | 1.71 esu                                                                                     | NA                                                                                         | [3]          |
| Cd <sup>2+</sup> -Complex                | experimental      | NA                                                     | NA                                                                                           | 4.1 $\gamma(X10^{-44}\text{m}^5/\text{V}^2)$                                               | [4]          |
| NDI-2NO <sub>2</sub>                     | CAM-B3LYP         | NA                                                     | NA                                                                                           | 62.43000 esu                                                                               | [5]          |
| Ni-Schiff-base                           | experimental      | NA                                                     | 235 esu                                                                                      | NA                                                                                         | [6]          |
| Cu-Schiff-base                           | experimental      | NA                                                     | 237 esu                                                                                      | NA                                                                                         | [6]          |

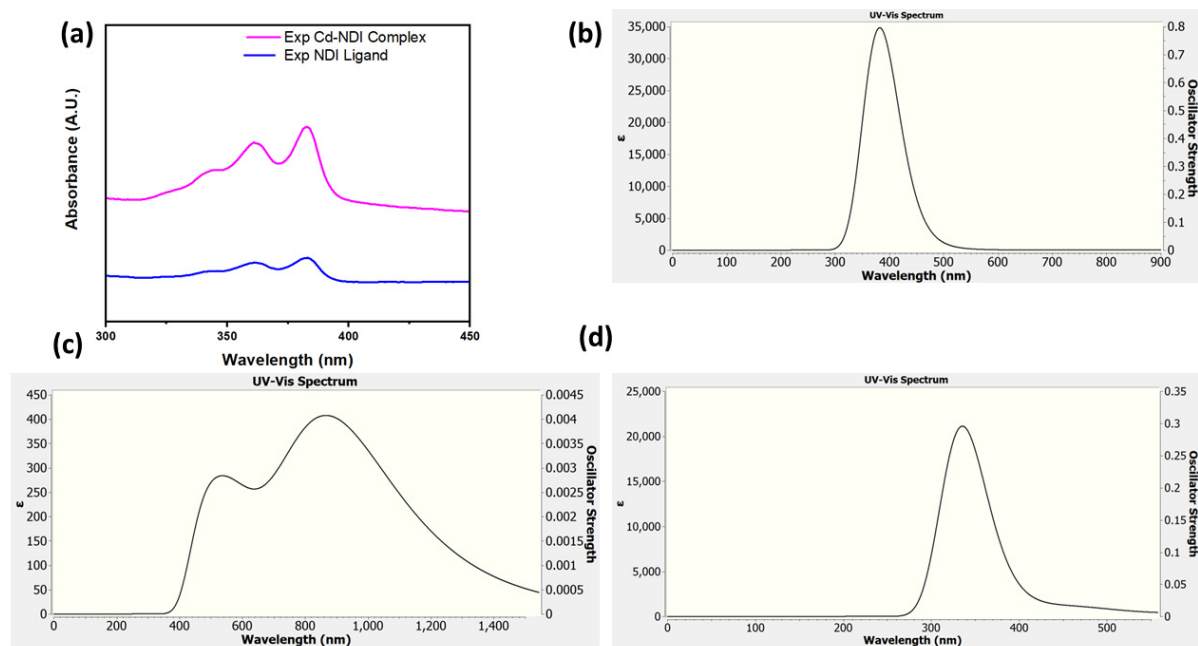

Figure S4: UV-visible absorption graphs of (a) experimental Cd-NDI complex, (b) computational of Cd-NDI complex through CAM-B3LYP/LANL2DZ (c) computational of Cd-NDI complex through B3LYP/LANL2MB and (d) computational of H<sub>2</sub>-L-ala NDI through CAM-B3LYP/LANL2DZ, respectively.

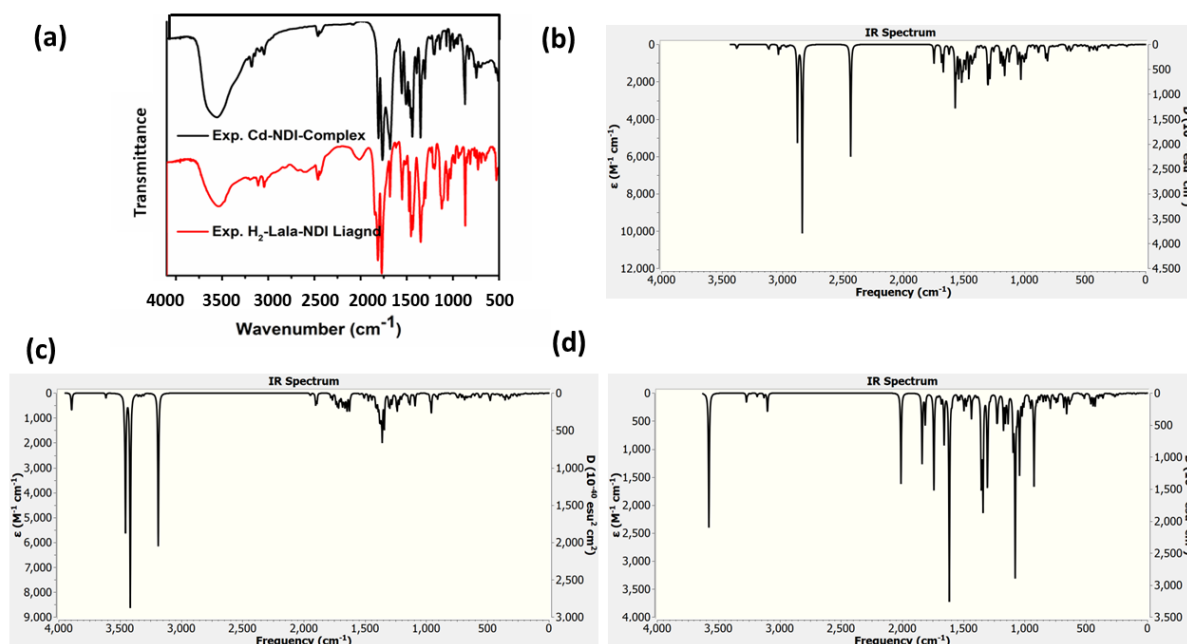

Figure S5: IR spectra of (a) experimental Cd-NDI complex, (b) computational of Cd-NDI complex through CAM-CAM-B3LYP/LANL2DZ (c) computational of Cd-NDI complex through B3LYP/LANL2MB and (d) computational of H<sub>2</sub>-L-ala NDI through CAM-CAM-B3LYP/LANL2DZ, respectively.

## References

1. Dolomanov, O.V.; Bourhis, L.J.; Gildea, R.J.; Howard, J.A.; Puschmann, H. OLEX2: A complete structure solution, refinement and analysis program. *J. Appl. Crystallogr.* **2009**, *42*, 339–341.
2. Wang, L.; Liu, Y.-L.; Wang, M.-S. The organic co-crystals formed using naphthalenediimide-based triangular macrocycles and coronene: intermolecular charge transfers and nonlinear optical properties. *Phys. Chem. Chem. Phys.* **2022**, *24*, 29747–29756, <https://doi.org/10.1039/d2cp03236h>.
3. Lucenti, E.; Cariati, E.; Dragonetti, C.; Manassero, L.; Tessore, F. Effect of the Coordination to the “Os<sub>3</sub> (CO)<sub>11</sub>” Cluster Core on the Quadratic Hyperpolarizability of trans-4-(4'-X-styryl) pyridines (X= NMe<sub>2</sub>, t-Bu, CF<sub>3</sub>) and trans, trans-4-(4'-NMe<sub>2</sub>-phenyl-1, 3-butadienyl) pyridine. *Organometallics* **2004**, *23*, 687–692. <https://doi.org/10.1021/om034086r>
4. Tessore, F.; Di Carlo, G.; Forni, A.; Righetto, S.; Limosani, F.; Biroli, A.O. Second Order Nonlinear Optical Properties of 4-Styrylpyridines Axially Coordinated to A<sub>4</sub> Zn<sup>II</sup> Porphyrins: A Comparative Experimental and Theoretical Investigation. *Inorganics* **2020**, *8*, 45, <https://doi.org/10.3390/inorganics8080045>.
5. Prasad, G.K.; Prashanth, S.; Srivastava, S.; Rao, G.N.; Babu, D.R. Synthesis, characterization, second and third order non-linear optical properties and luminescence properties of 1,10-phenanthroline-2,9-di(carboxaldehyde phenylhydrazone) and its transition metal complexes. *Open Chem.* **2017**, *15*, 283–292, <https://doi.org/10.1515/chem-2017-0036>.
6. Qiu, Y.-Q.; Li, Z.; Ma, N.-N.; Sun, S.-L.; Zhang, M.-Y.; Liu, P.-J. Third-order nonlinear optical properties of molecules containing aromatic diimides: Effects of the aromatic core size and a redox-switchable modification. *J. Mol. Graph. Model.* **2013**, *41*, 79–88.
7. Trujillo, A.; Fuentealba, M.; Carrillo, D.; Manzur, C.; Ledoux-Rak, I.; Hamon, J.-R.; Saillard, J.-Y. Synthesis, spectral, structural, second-order nonlinear optical properties and theoretical studies on new organometallic donor- acceptor substituted nickel (II) and Copper (II) unsymmetrical Schiff-base complexes. *Inorg. Chem.* **2010**, *49*, 2750–2764.
